# Supplementary material for: miR-26a and miR-384-5p are required for LTP maintenance and spine enlargement
Source: PubMed Central journal article supplement (PMC4403380; doi:10.1038/ncomms7789), 2015-04-10
Supplement: ncomms7789-s1.pdf [file ncomms7789-s1.pdf]

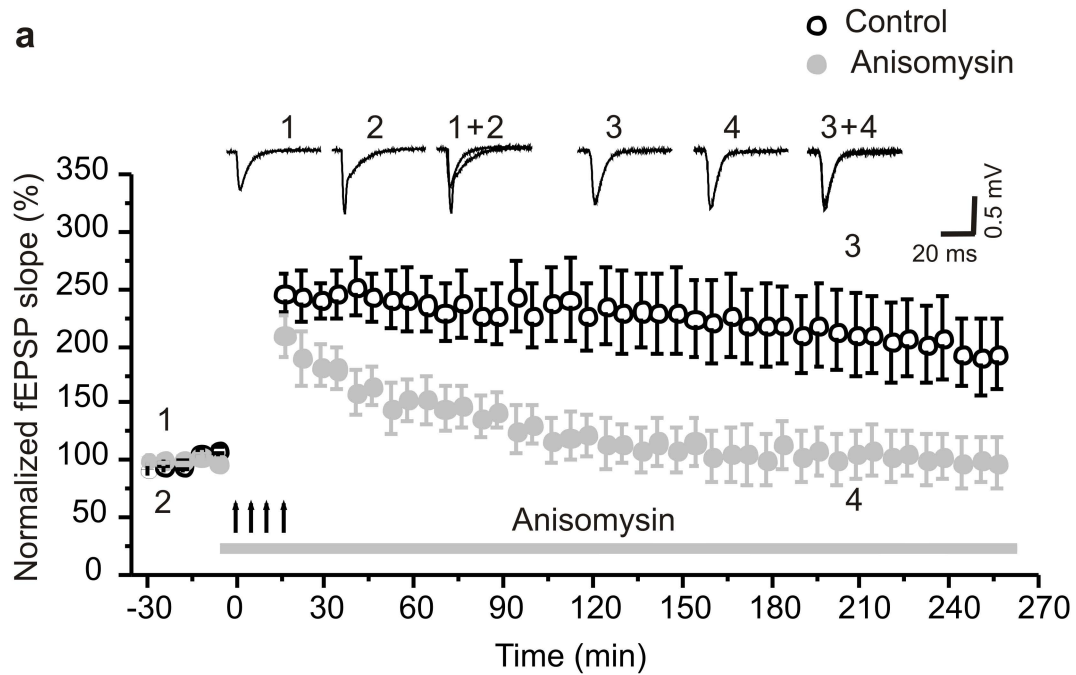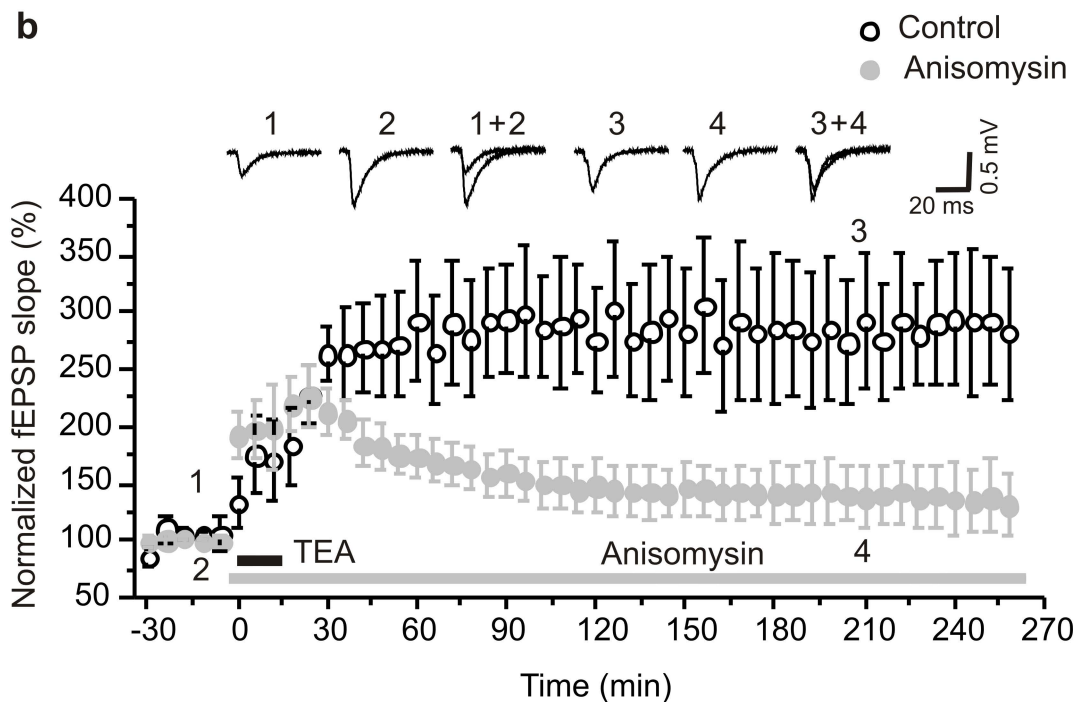

**Supplementary Figure 1.** Induction of translation-dependent LTP in the hippocampus. Hippocampal slices prepared from mice (2~3-week old) were stimulated at the Schaffer collateral pathway with 4 trains of 100 Hz pulses (a), or treated with TEA (b) for LTP induction. Anisomysin (20  $\mu$ M) was added at 5 min before LTP induction. The fEPSP slope normalized to the baseline prior to stimulation was plotted as mean  $\pm$  SEM.  $n = 5-6$  slices for each group.

### Color Key

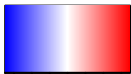

-1.5 0 1  
Value

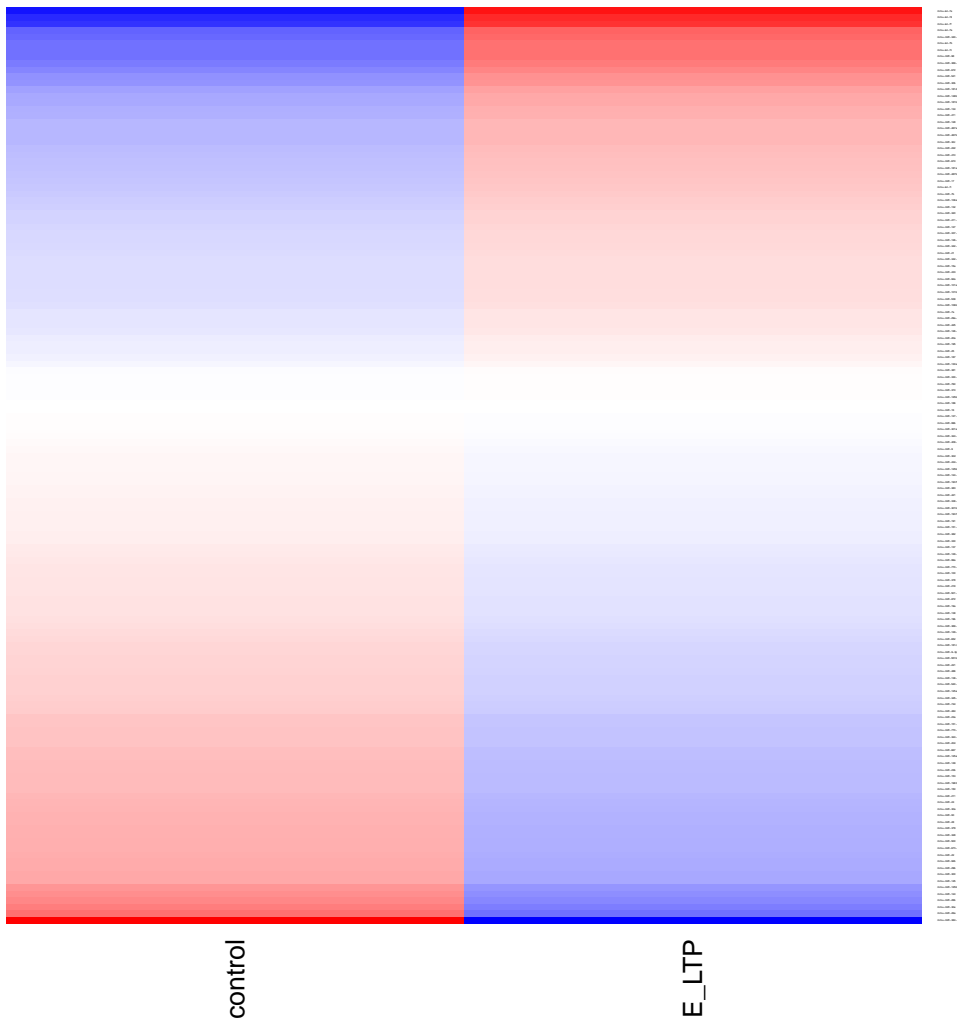

**Supplementary Figure 2.** Heat map of miRNAs analyzed for differential expression. Mean read counts of miRNAs following normalization are ordered by their p-values from small to large.

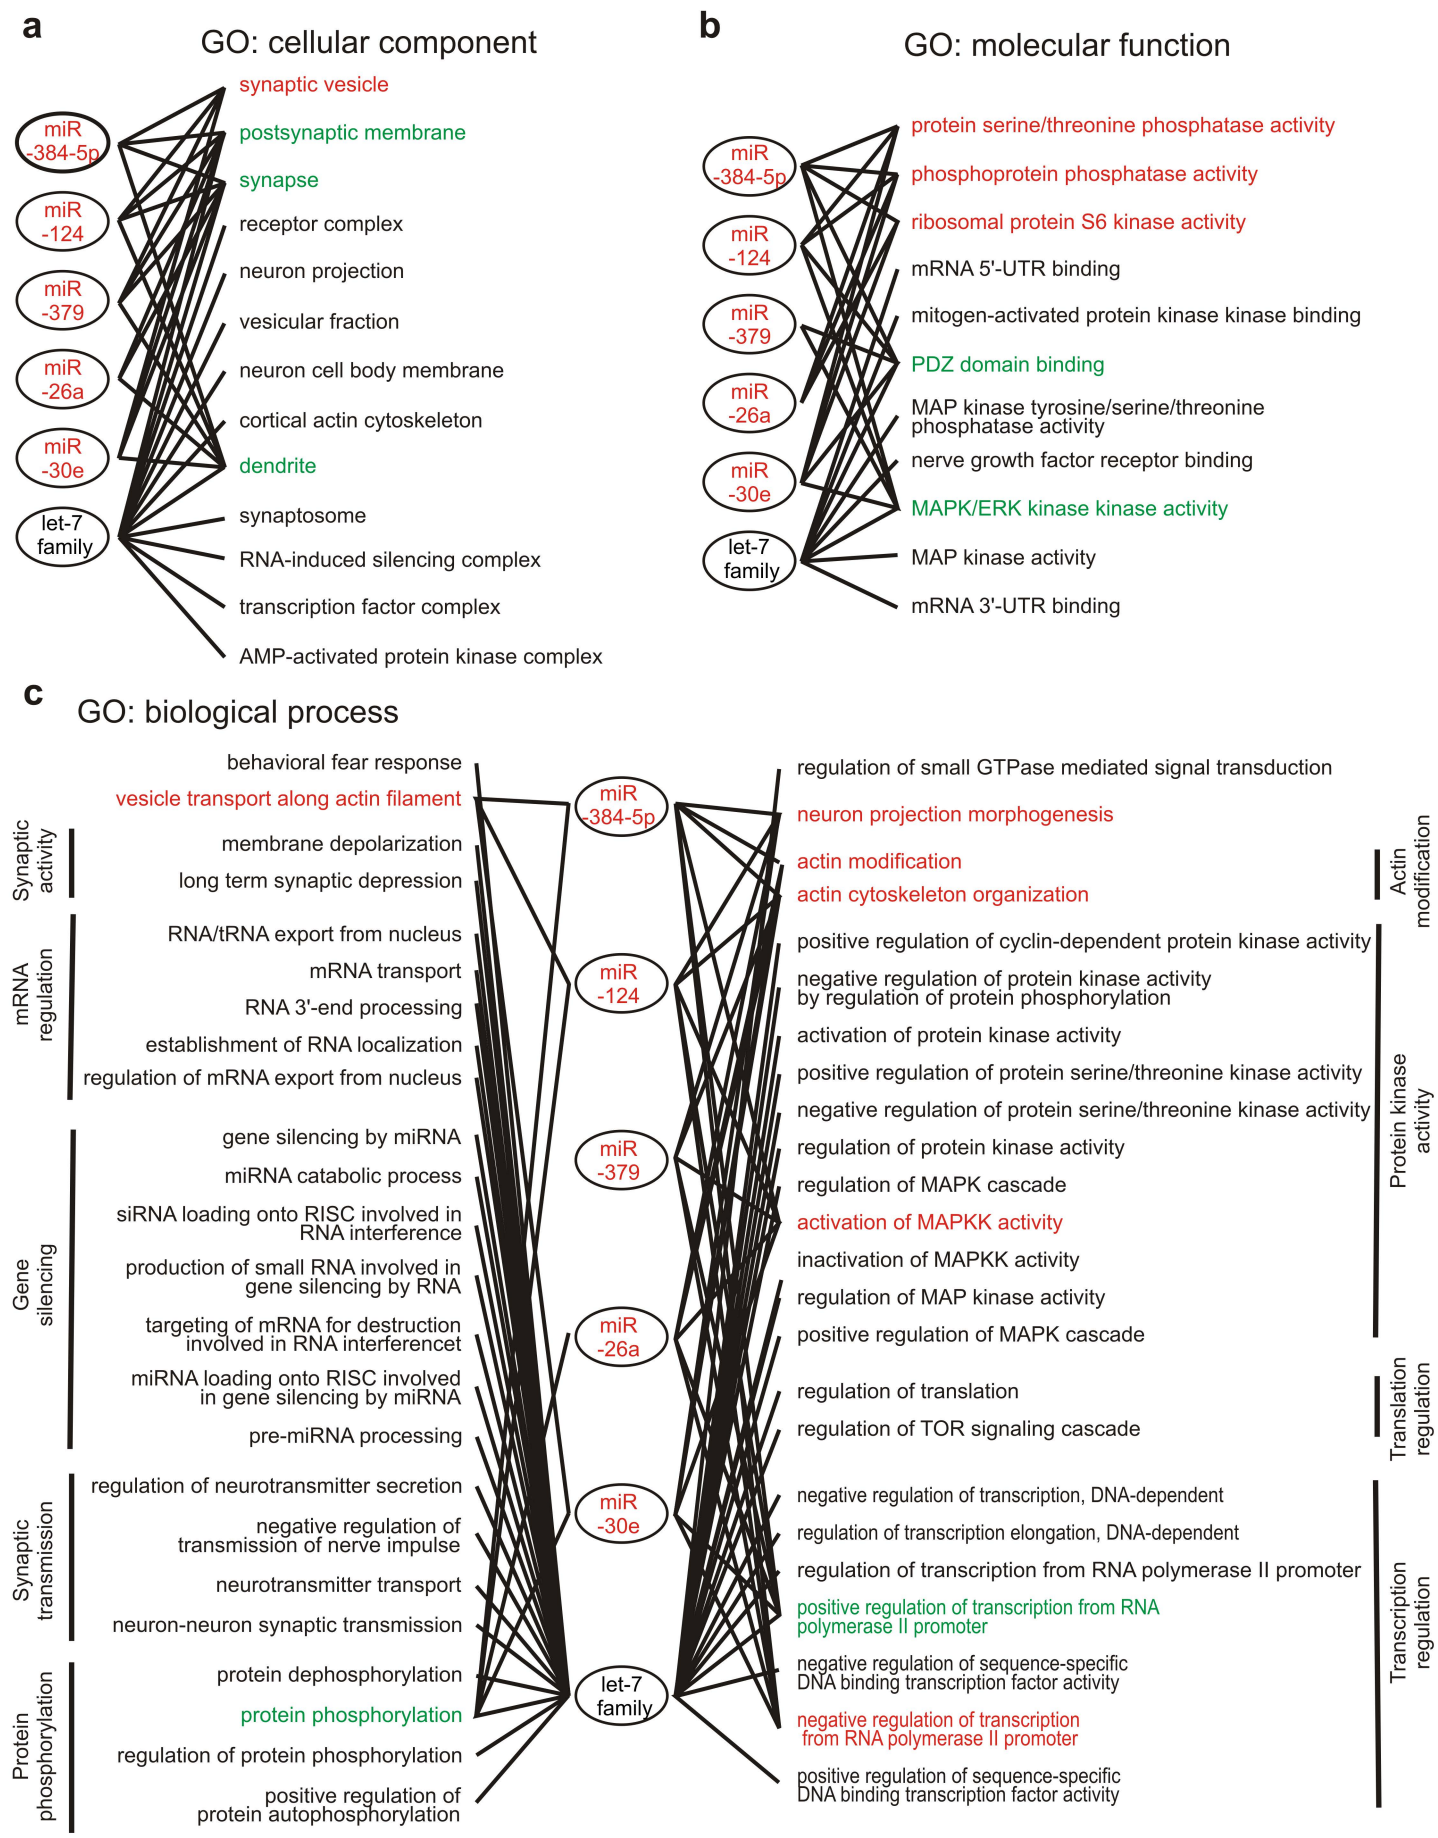

**Supplementary Figure 3.** Gene-ontology (GO) terms enriched by miRNAs differentially expressed in LTP. The enriched cellular component terms are shown in a, the enriched molecular function terms in b, the enriched biological process terms in c. GO terms enriched by down-regulated miRNAs are in red, by up-regulated miRNAs in black, and by both up- and down-regulated miRNAs in green.

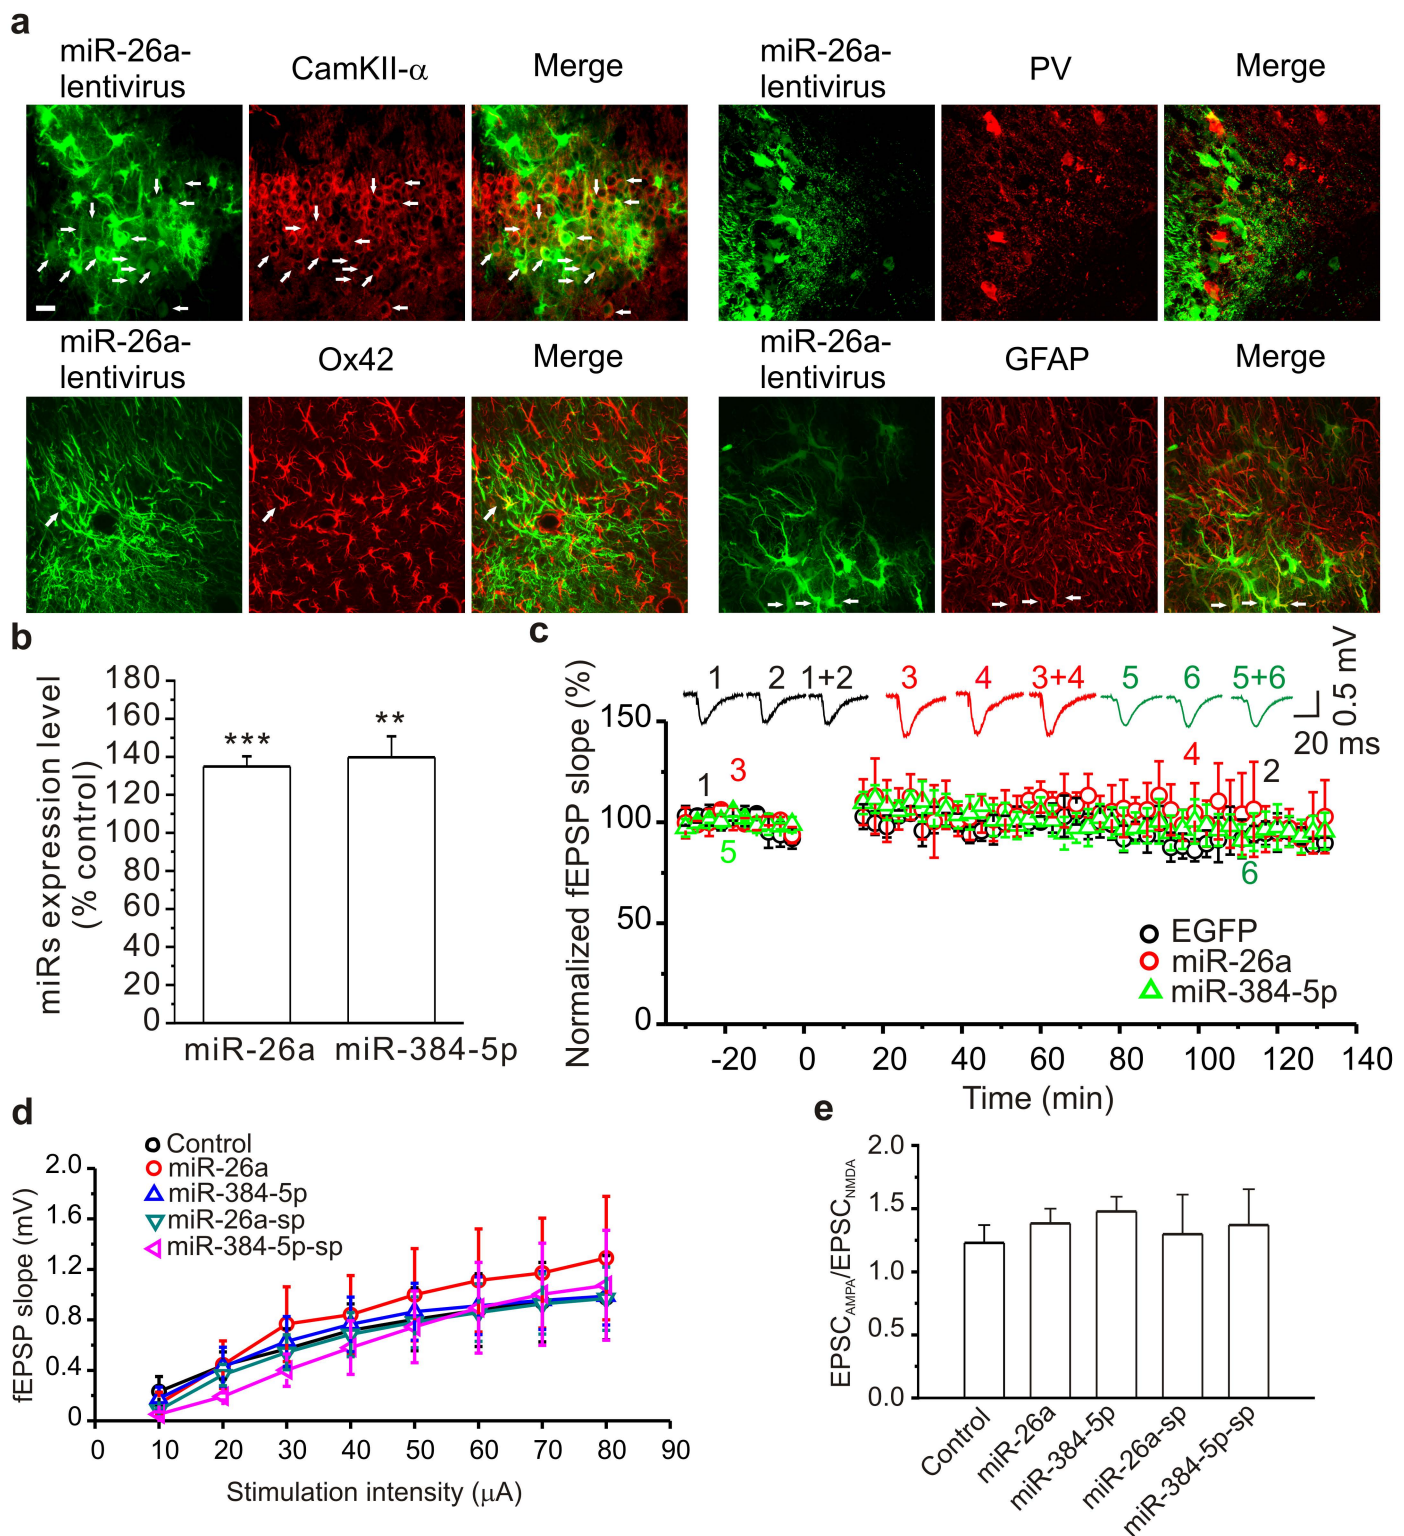

**Supplementary Figure 4.** miR-26a and miR-384-5p have no effect on the control pathway. (a) Representative images of the hippocampal CA1 region transduced with control virus or lentivirus expressing miR-26a or miR-384-5p, and stained with antibodies against Ca<sup>2+</sup>/calmodulin-dependent protein kinase II (CamkII), parvalbumin, glial fibrillary acidic protein (GFAP) or Ox42; arrows point to transduced cells colocalized with designated cell type markers; scale bar: 20  $\mu$ m. (b) Cultured hippocampal slices were transduced with control virus (expressing EGFP) or lentivirus expressing miR-26a or miR-384-5p for qRT-PCR analysis of miR-26a and miR-384-5p. (c) Electrophysiological recording at both the CA3-CA1 (stimulated with high-frequency stimulation) and the subicular-CA1(control) pathway. Data in c show fEPSPs recorded in the control pathway (presented as mean  $\pm$  SEM);  $n = 5-6$  slices for each condition. (d) The input-output relationship in cultured hippocampal slices transduced with designated lentivirus ( $n = 5-10$  slices in each group). (e) The ratio of AMPA and NMDA receptor-mediated currents in cultured hippocampal slices transduced with designated lentivirus ( $n = 6-10$  neurons in each group).

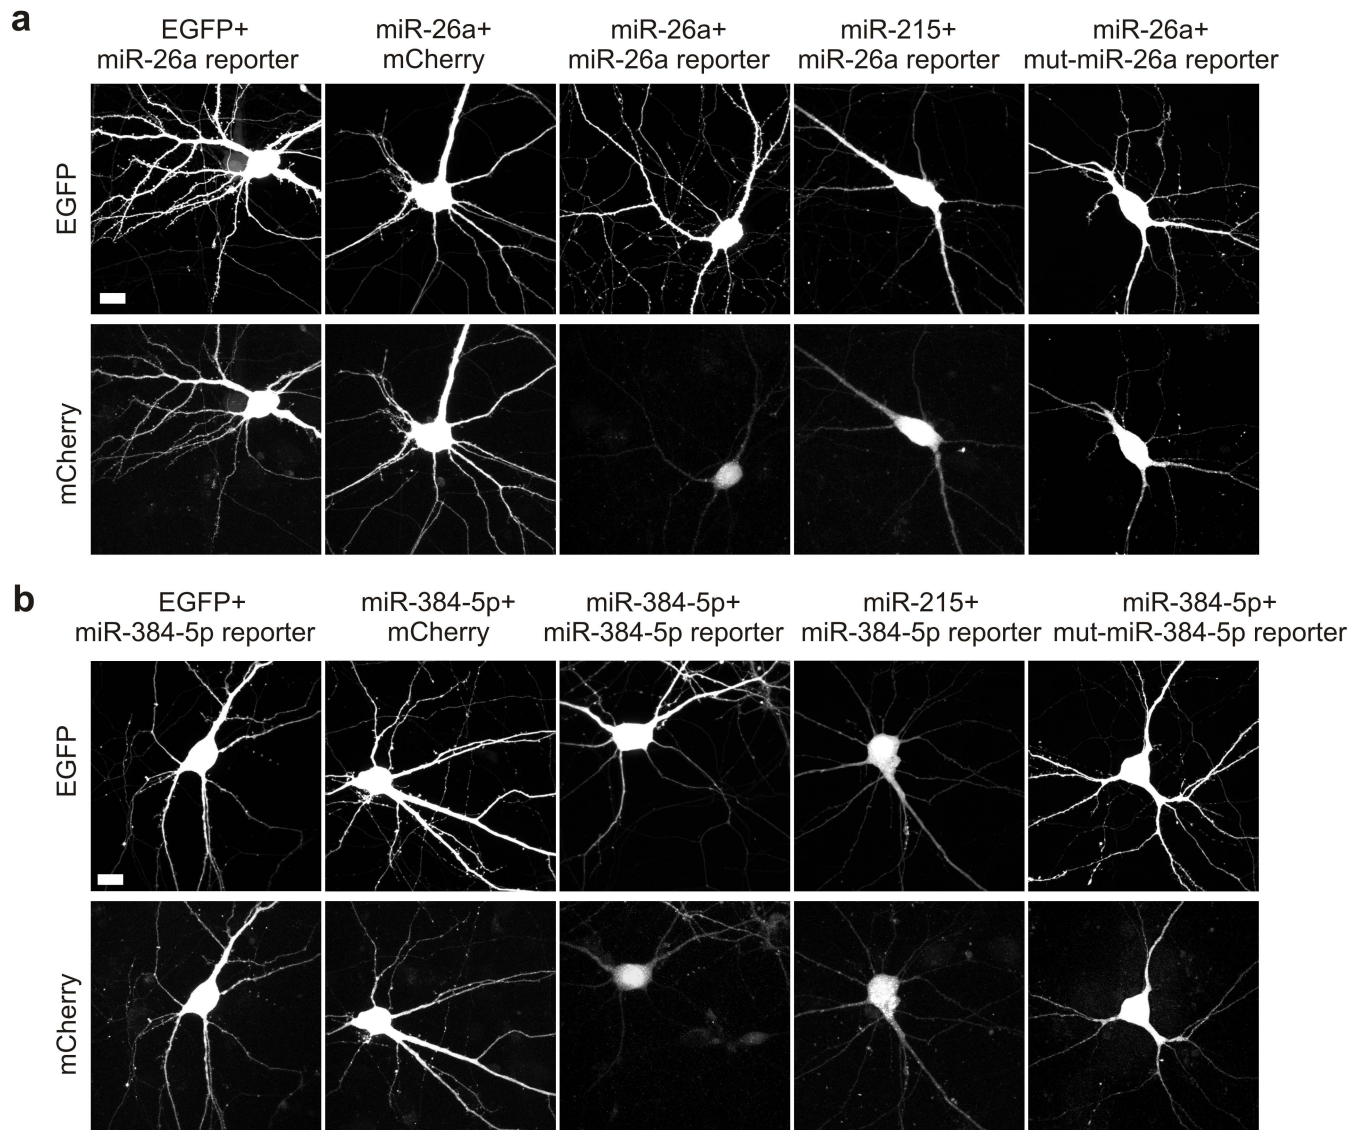

**Supplementary Figure 5.** RSK3 is a validated target of miR-26a and miR-384-5p. Cultured hippocampal neurons were transfected with designated constructs at DIV14 and fixed at DIV17. (a, b) Representative images of transfected neurons.

**a**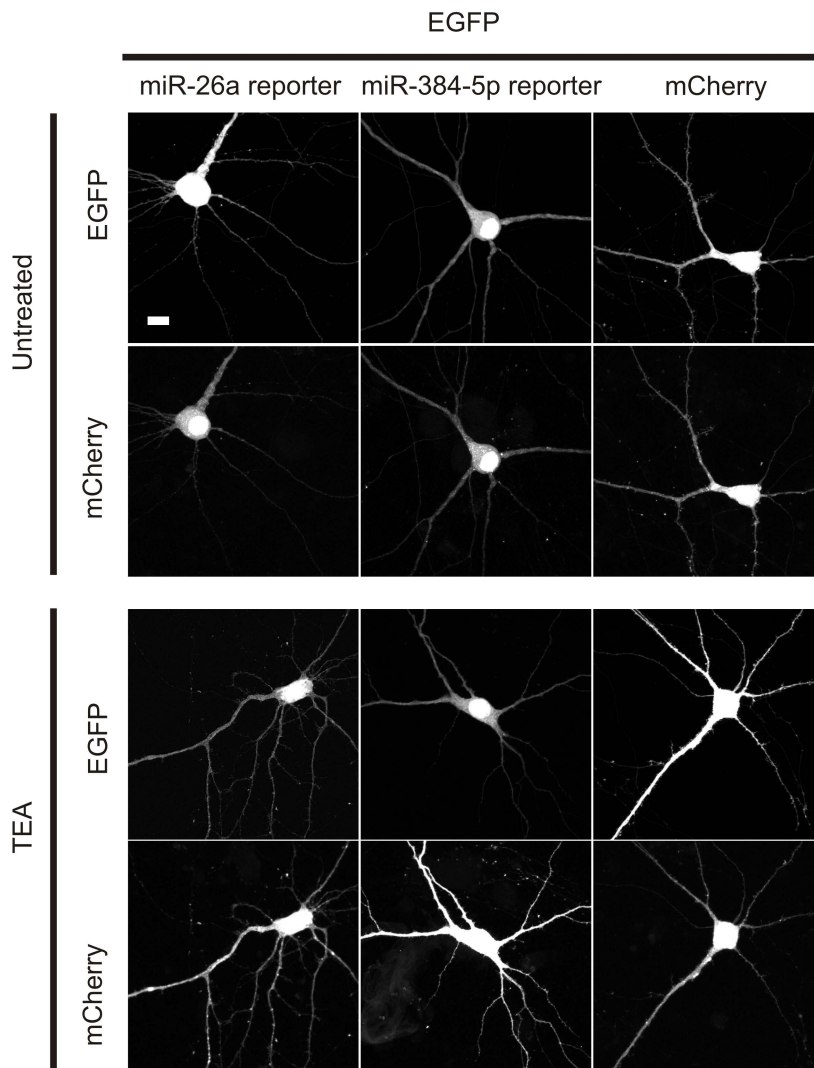**b**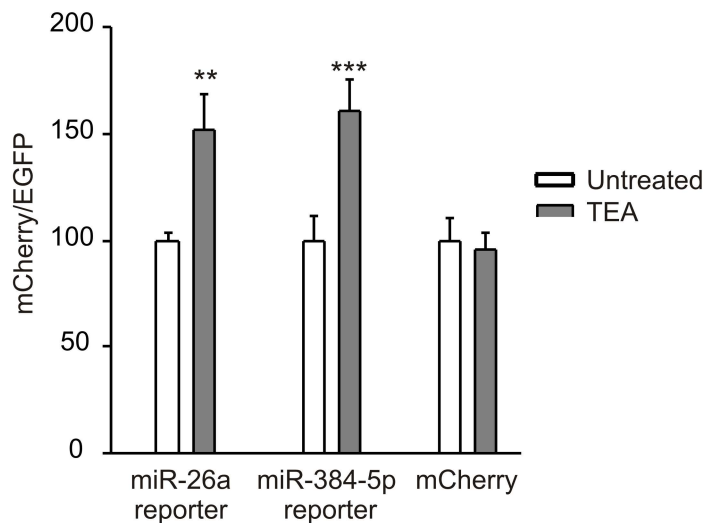

**Supplementary Figure 6.** TEA treatment alters the expression of reporters containing RSK3's miR-26a and miR-384-5p binding sites. Cultured hippocampal neurons (DIV 14) were co-transfected with the EGFP plasmid and the mCherry reporter constructs containing the miR-26a or miR-384-5p binding sites found in RSK3's 3'UTR. At 2-3 days after transfection, neurons were treated with TEA for 15 min, and fixed for image acquisition, neurons were treated with TEA for 15 min, and fixed for image acquisition at 90 min after treatment. (a) Representative images of transfected neurons. (b) Quantification of a. Scale bar, 20  $\mu$ m. n = 20-40 neurons for each condition. Data are presented as mean  $\pm$  SEM. Mann-Whitney U test is used for statistical analysis. \*\* p<0.01, \*\*\* p<0.001.

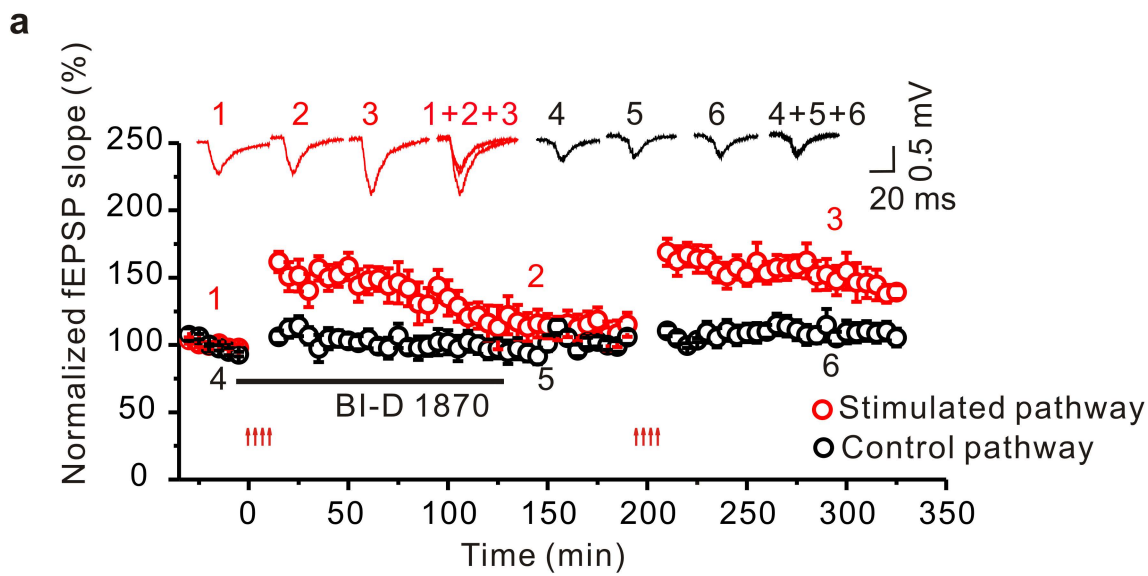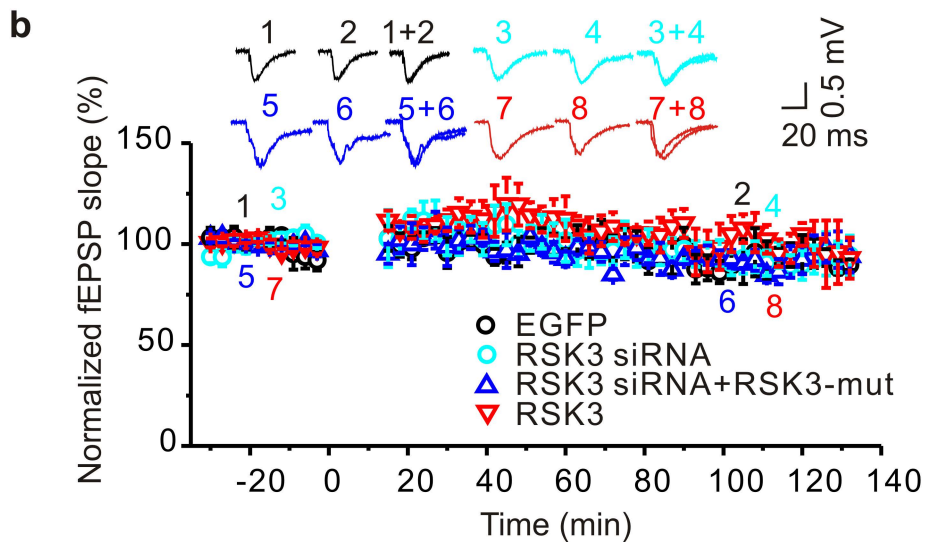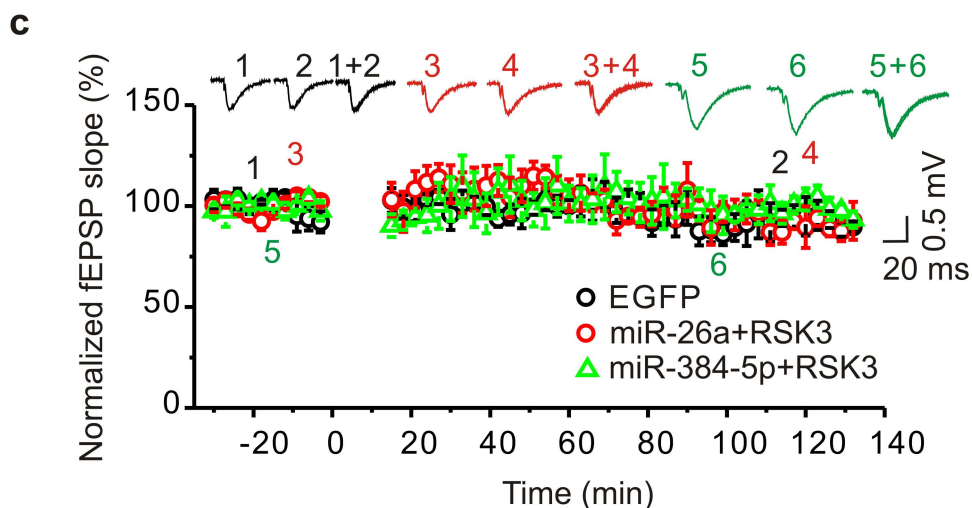

**Supplementary Figure 7.** The blockade of LTP maintenance by BI-D1870 is reversible. (a) Cultured hippocampal slices were treated with the RSK inhibitor BI-D1870 (200 nM) and stimulated with 4 tetanizations to induce LTP. At 2 hr after LTP induction, BI-D1870 was washed out, and slices were stimulated with tetanic stimulation again. (b, c) Cultured hippocampal slices were transduced with designated lentivirus and recorded at the CA1 region for responses evoked by stimulating the CA3-CA1 (for LTP induction) and the subicular-CA1 pathway (control pathway); data in b and c show the fEPSP (recorded from the control pathway) slope normalized to the baseline prior to stimulation (plotted as mean  $\pm$  SEM).  $n = 5$  slices for each condition.

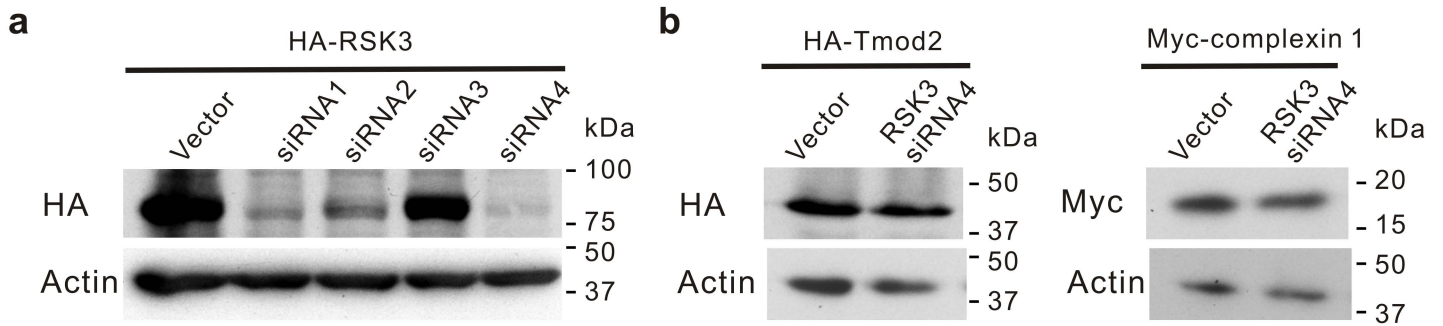

**Supplementary Figure 8.** The efficacy and specificity of RSK3 siRNA. Cos-7 cells were transfected with the RSK3 siRNA constructs along with HA tagged RSK3, TMOD2 or myc-tagged complexin 1. Cells were harvested at 2 days after transfection for immunoblotting against HA or myc.



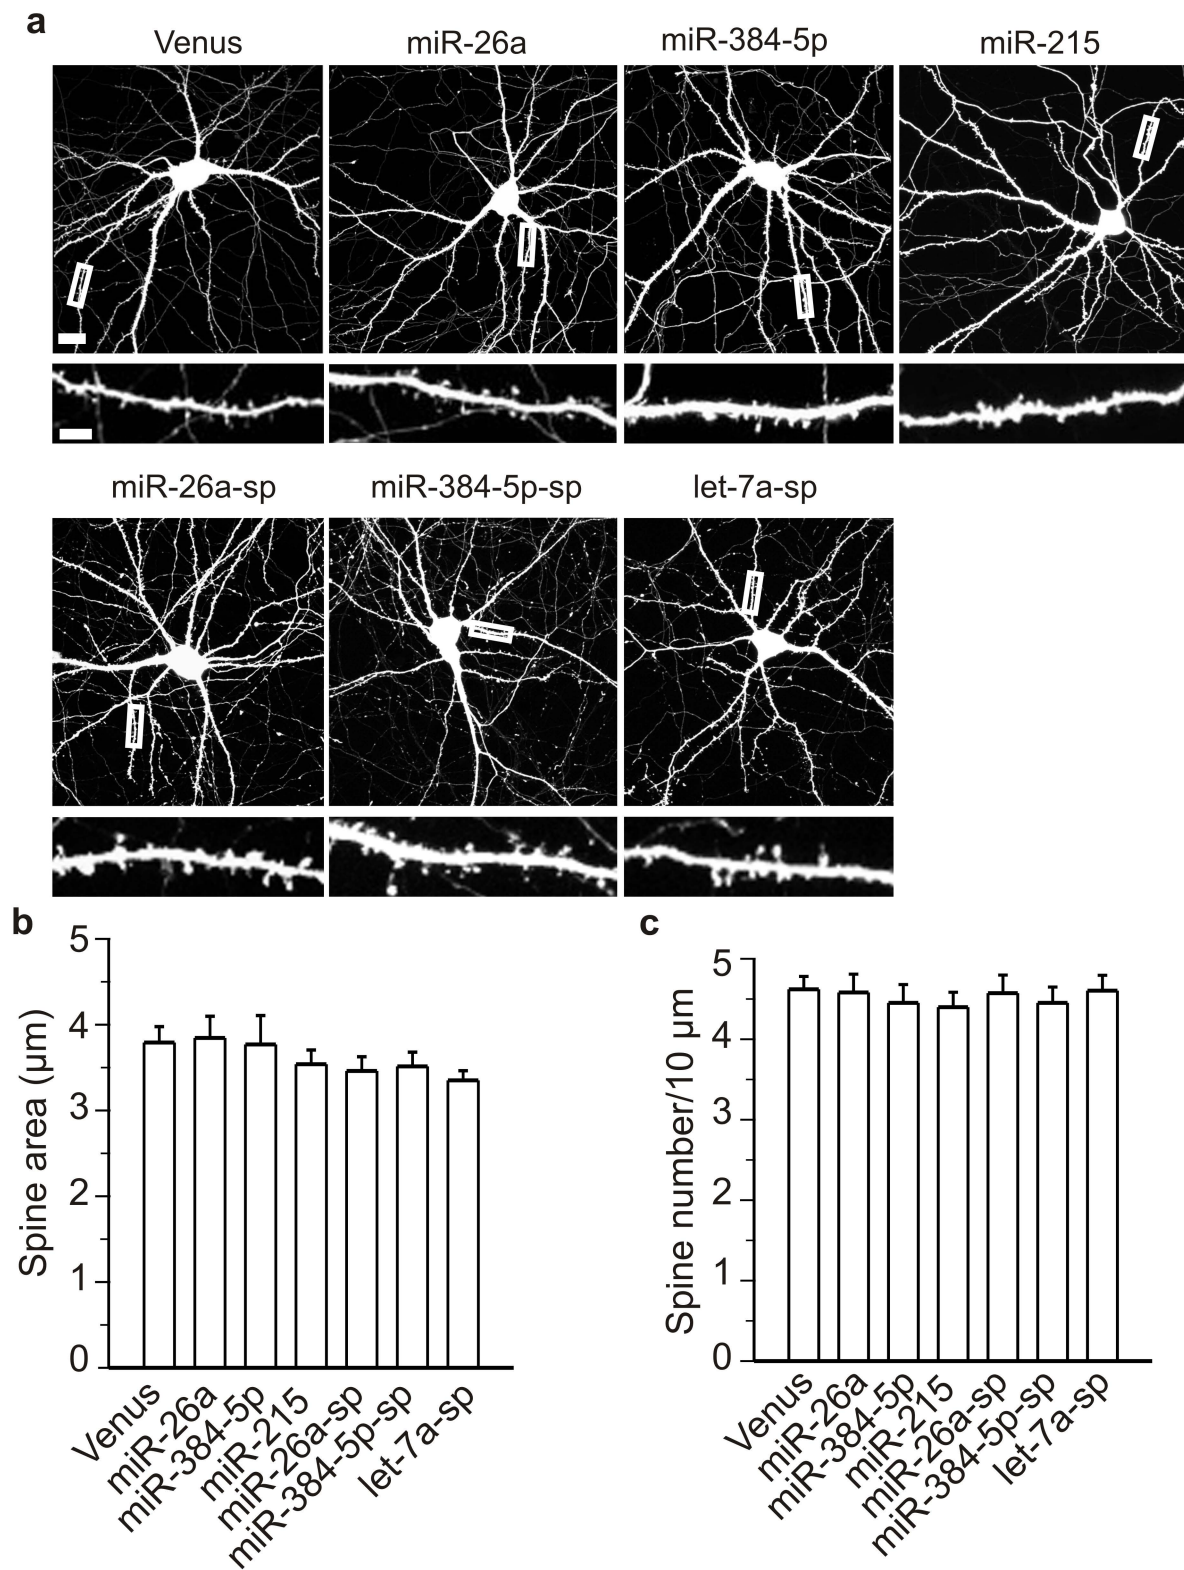

**Supplementary Figure 9.** miR-26a, miR-384-5p and let-7a do not affect the basal level of spine size and density. Cultured hippocampal neurons (DIV14) were transfected with the Venus constructs along with constructs expressing designated miRNAs or miRNA sponges, and imaged at 2-3 days after transfection. (a) Represented images. (b-c) Quantification of a. Data are presented as mean  $\pm$  SEM. Scale bar, 20  $\mu$ m for low- and 5  $\mu$ m for high-magnification images.

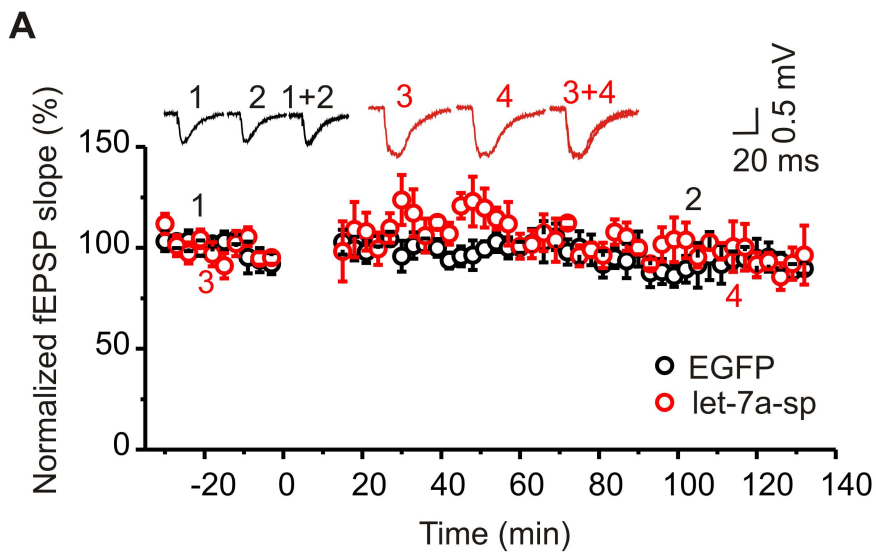

**Supplementary Figure 10.** Let-7a knockdown has no effect on the control pathway. Cultured hippocampal slices were transduced with the EGFP virus or lentivirus expressing let-7a sponge, and recorded at both the CA3-CA1 (stimulated with high-frequency stimulation) and the subicular-CA1 (control) pathway. Data show fEPSPs recorded in the control pathway (presented as mean  $\pm$  SEM).  $n = 5-6$  slices for each condition.

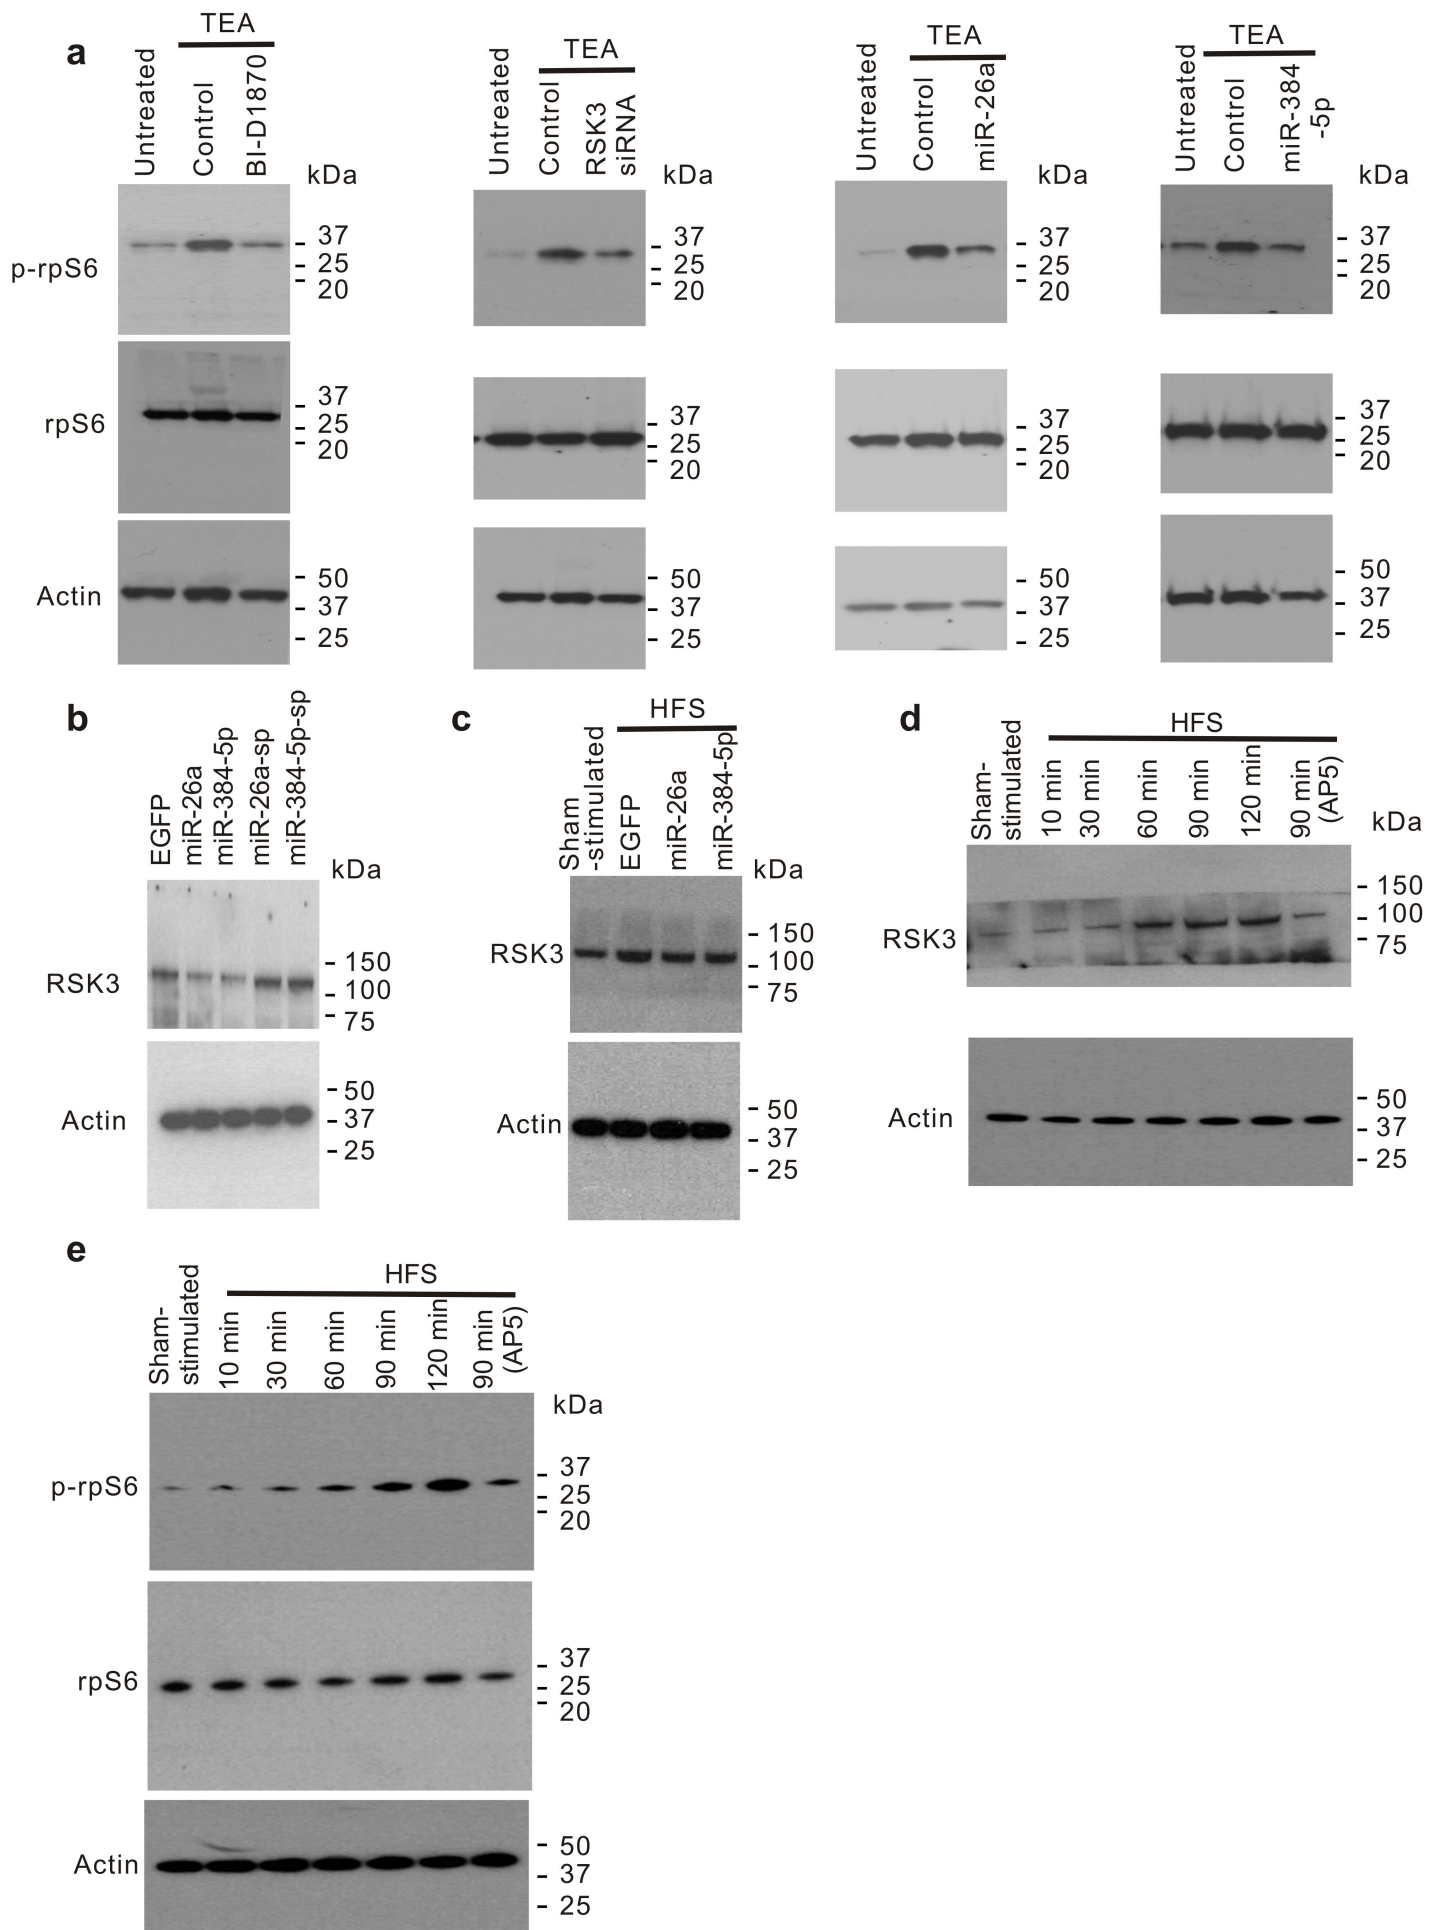

**Supplementary Figure 11.** Full-blot images of immunoblots. (a) Full-blot images of the cropped representative blots for p-rpS6, rpS6 and actin in Figure 4. (b, c) Full-blot images of the cropped representative blots for RSK and actin in Figure 3c,e. (d) Full-blot images of the cropped representative blots for RSK and actin in Figure 7e. (e) Full-blot images of the cropped representative blots for p-rpS6, rpS6 and actin in Figure 7g.

**Supplementary Table 1.** Summary of sequencing results.

| <b>Sample ID</b> | <b>Read count</b> | <b>Mapped read</b> | <b>% Mapped</b> |
|------------------|-------------------|--------------------|-----------------|
| Control-1        | 591741            | 434847             | 73              |
| Control-2        | 225731            | 173992             | 77              |
| Control-3        | 531646            | 363928             | 68.5            |
| LTP-1            | 76633             | 57790              | 75              |
| LTP-2            | 673645            | 446227             | 66.2            |
| LTP-3            | 728130            | 464387             | 63.8            |

**Supplementary Table 2. Genes enriched by miRNAs differentially expressed in LTP.**

| <b>Down-regulated miRNAs</b> |                                                                                                                                                                                                                                                                                                                                                                                                                                                                                                                                                                                                                                                                                                                                                                                                                                                                                                                                                                                                                                                                                                                                                                                                                                                                                                                                                                                                                                                                                                                                                                                                                                                                                                                                                                                                                                                                                                                                                                                                                                                                                                                                                                                                                                                                                                                                                                                                                                                                                                                                                                                                                                                                                                                                                                                                                                                                                                                                                                                                                                                                                                                                                                                                                                                                        |
|------------------------------|------------------------------------------------------------------------------------------------------------------------------------------------------------------------------------------------------------------------------------------------------------------------------------------------------------------------------------------------------------------------------------------------------------------------------------------------------------------------------------------------------------------------------------------------------------------------------------------------------------------------------------------------------------------------------------------------------------------------------------------------------------------------------------------------------------------------------------------------------------------------------------------------------------------------------------------------------------------------------------------------------------------------------------------------------------------------------------------------------------------------------------------------------------------------------------------------------------------------------------------------------------------------------------------------------------------------------------------------------------------------------------------------------------------------------------------------------------------------------------------------------------------------------------------------------------------------------------------------------------------------------------------------------------------------------------------------------------------------------------------------------------------------------------------------------------------------------------------------------------------------------------------------------------------------------------------------------------------------------------------------------------------------------------------------------------------------------------------------------------------------------------------------------------------------------------------------------------------------------------------------------------------------------------------------------------------------------------------------------------------------------------------------------------------------------------------------------------------------------------------------------------------------------------------------------------------------------------------------------------------------------------------------------------------------------------------------------------------------------------------------------------------------------------------------------------------------------------------------------------------------------------------------------------------------------------------------------------------------------------------------------------------------------------------------------------------------------------------------------------------------------------------------------------------------------------------------------------------------------------------------------------------------|
| <i>miRNA ID</i>              | <i>Enriched target gene</i>                                                                                                                                                                                                                                                                                                                                                                                                                                                                                                                                                                                                                                                                                                                                                                                                                                                                                                                                                                                                                                                                                                                                                                                                                                                                                                                                                                                                                                                                                                                                                                                                                                                                                                                                                                                                                                                                                                                                                                                                                                                                                                                                                                                                                                                                                                                                                                                                                                                                                                                                                                                                                                                                                                                                                                                                                                                                                                                                                                                                                                                                                                                                                                                                                                            |
| mmu-miR-124                  | Adamts9, Dmd, Ednrb, Fxr1, Gfpt2, Gnai2, Kif3a, Myo5a, P4ha2, Sypl, Rarg, Kctd8, Vat1l, Usp2, B4galt6, Sec61a2, Polr3g, Zfp706, Elovl5, Kctd5, 3110043O21Rik, Faf2, 2310046O06Rik, Bcl2l13, Sall4, Oaf, Osbpl11, Epha2, Gna13, 2700050L05Rik, Ccdc28a, Cldnd1, Slc9a2, Frmd4b, Slc2a13, Wipf3, Dapk1, Dram1, Sema6d, Reep3, Atad2b, Brwd3, Celsr3, Gpt2, Bcl6, Cbx2, Pip4k2a, Rwwd4a, Surf4, Usp49, Cadps, Zbtb11, Lrrc58, Dll4, Rffl, Ube2v2, Gria2, Mat2a, Map3k1, Zfp275, Stk39, Dlg5, Larp1, Ranbp10, Kif21b, Fbxo42, Slco5a1, Baz2b, Tet1, Nap1l5, Mtdh, Eaf1, Ovol2, Acp2, Calu, Eya2, P4ha1, Pnn, Snai2, Parp16, Ube2i, Sdad1, Lrrc3, Cpne5, Lrrfp2, Pgm2, Pus10, Usp48, Kalrn, At13, Pcdh17, Zfp608, Sh3rf1, Lnp, Zdhhc20, Fa2h, Tmed10, Abcc4, Fam174b, Fam150b, Slc15a4, Usp30, Hepacam2, Numa1, Gcom1, 10-Sep, Qsox1, Lmf2, Fbxo38, Rapgef1, Cstf2, Rnpepl1, Ccdc86, Pttg1ip, Sft2d2, Aif1l, Cyb5, Pecr, Abca2, Acadvl, Ache, Aspa, Adcy9, Acan, Ak2, Ampd3, Anxa4, Anxa5, Prdx6, Ap1m2, Arpc1b, Rab27a, Atp1a1, Barx2, Bckdha, Bmp6, Cacnb2, Capn1, Casq2, Cav1, Col12a1, Cpt1a, Cycs, Slc25a1, Dlx5, Dnajc1, Dsg2, Efnb1, Rhbdf1, Epha3, Eya1, Ube4a, Cacng5, Flot1, Fpgs, Fzd4, Xrcc6, Galc, Gas1, Gas2, Gdap2, Gnai1, Gnal, Gng10, Gpam, Lpcat3, Aes, Hadh, Nr4a1, Hoxb1, Itga7, Itgae, Stt3a, Itpr3, Kcnk2, Kif2a, Hivep3, Lhx2, Lipe, BC017612, Tmed1, Galnt10, Mdk, Cox4nb, Nthl1, Nxn, Pcdh8, Peg3, Pemt, Phex, Pip5k1a, Lcp1, Ppfibp2, Ppl, Casc3, Luc7l2, Wdr81, Ptporz1, BC046404, Rab3d, Rgs9, Rras, Rxra, Ryr1, Scd1, Scd2, Scn7a, Slc22a5, Slit1, Snta1, Sos2, Sox8, Sphk1, Pde2a, Yeats2, Rsrc2, Suclg2, Clic6, Sdc4, AF529169, Thsd7b, Mkk, Cspp1, Aldh4a1, Lman2l, Arrdc1, Aldh1l2, Pik3ip1, Rufy1, Pqlc3, L2hgdh, Tjp2, Zfp503, Spata13, Top3a, Tpst2, Ttc3, Eny2, Zbed4, Pim3, Lemd2, Enpp4, Zfp239, Arhgef4, Ctdsp1, Gsn, Smox, Trib3, Gdap11l, Cbln4, Galnt12, Zfp189, E130308A19Rik, Usp1, Zmpste24, Serinc2, B930041F14Rik, 9330182L06Rik, Galnt9, Tmem150a, Shisa7, Zscan22, Fbxo27, Nipa1, Thumpd1, Tpcn2, Tmco3, Ftsjd1, Sc5d, Slc17a5, Gk5, Lrfn5, 6430527G18Rik, Mtr, Fxr2, Tmem20, Tmem8b, Dmrta1, Tsku, Ssh3, Chodl, Ttc26, Plod3, Slc27a1, Homer2, Ror, Zscan20, Lpcat2, Yme11, Marveld1, Nynrin, Eif3b, Nsun2, Apln, Tor3a, Casc4, Tmem117, Sdk1, Ctxn1, Slc9a9, Slc2a12, 5930434B04Rik, Xkr8, Gpr114, Poc1b, Itrip1, Zfp213, Slc25a13, Agpat5, Dhrr1, Vamp4, Htatip2, Cd164, 9-Sep, Zkscan4, Sfrp5, Rcan1, Brp44l, Slc1a4, Hebp2, Rhog, Srpk3, Nme4, Aldh9a1, Apba3, Slc29a1, Sdf2l1, Suv39h2, Vps35, Twsg1, Tmem111, 1110031I02Rik, Tpd5l2, Farsa, Lix1, Nhlrc2, Pcyox1, Prpf38b, Cand2, 2410127L17Rik, Fundc2, Frmd8, Snap29, Akt1s1, Dctn4, Fam174a, Ccdc130, Dgat2, Sugt1, Trabd, Dcackd, A1846148, Lmbrd1, Steap3, Ppm1f, Acss1, 1110059M19Rik, 2310044H10Rik, Ttl, Zfp219, 2610018G03Rik, Tspan15, Inf2, Arhgap17, Hars2, Ccdc93, Osbpl7, Myo1e, Ankle2, Rnf135, Snx6, Kcnk10, Plekhf1, Pan3, Zkscan3, Spock3, 1110012D08Rik, Slc35f5, Paqr8, Chic2, Dhcr24, Mmd2, Rasd2, Fgfr1op, Ascc2, Pcdh1, Rilpl1, Morc4, Gstk1, Glt8d1, Clip3, Tbc1d9b, Fam81a, Lass2, Agl, Myh10, Zfp687, Mvp, Tsc22d4, Sp2, Gas2l1, Ern1, Trim39, Parp9, Nckipsd, Tcfap4, Ctns, Slc12a9, Tbx19, Narg2, C1galt1, Hadha, Efh1d, Rdh10, Stard7 |
| mmu-miR-26a                  | Mex3b, Pawr, Adam9, Ctnnd2, Twf1, Erlin1, Fkbp3, Jakmip2, Mfsd6, Oaf, Osbpl11, Epha2, Gna13, 2700050L05Rik, Ccdc28a, Cldnd1, Slc9a2, Frmd4b, Slc2a13, Dapk1, Dram1, Sema6d, Reep3, Atad2b, Brwd3, Epb4.1l3, Mab21l1, Smad1, Nid1, Ocln, Ppp3cb, Ptpn13, Rps6ka2, Tc11l2, Mkrn3, Cdh20, Abi2, Pcd10, Arl6ip6, Brap, Ube2ql1, Mat2a, Zfp275, Stk39, Dlg5, Larp1, Ranbp10, Kif21b, Fbxo42, Slco5a1, Baz2b, Tet1, Nap1l5, Mtdh, Eaf1, Usp48, Kalrn, At13, Zfp608, Sh3rf1, Lnp, Zdhhc20, Fa2h, Tmed10, Abcc4                                                                                                                                                                                                                                                                                                                                                                                                                                                                                                                                                                                                                                                                                                                                                                                                                                                                                                                                                                                                                                                                                                                                                                                                                                                                                                                                                                                                                                                                                                                                                                                                                                                                                                                                                                                                                                                                                                                                                                                                                                                                                                                                                                                                                                                                                                                                                                                                                                                                                                                                                                                                                                                                                                                                                                |
| mmu-miR-30e                  | Adamts9, Mex3b, Pawr, Adam9, Dmd, Ednrb, Fxr1, Gfpt2, Gnai2, Kif3a, Myo5a, Ctnnd2, P4ha2, Sypl, Twf1, Rarg, Sema3a, Erlin1, Kctd8, Vat1l, Fkbp3, Usp2, B4galt6, Sec61a2, Polr3g, Fbxo32, Zfp706, Elovl5, Kctd5, 3110043O21Rik, Jakmip2, Faf2, 2310046O06Rik, Bcl2l13, Mfsd6, Sall4, Wipf3, Sema6d, Reep3, Atad2b, Brwd3, Celsr3, Gpt2, Bcl6, Cbx2, Epb4.1l3, Fst, Mab21l1, Smad1, Nid1, Ocln, Pip4k2a, Ppp3cb, Rwwd4a, Ptpn13, Rps6ka2, Surf4, Tc11l2, Usp49, Mkrn3, Cdh20, Cadps, Zbtb11, Lrrc58, Abi2, Dll4, Pcd10, Arl6ip6, Edem3, Rffl, Ube2v2, Brap, Ube2ql1, Gria2, Mat2a, Map3k1, Zfp275, Stk39, Dlg5, Larp1, Ranbp10, Kif21b, Fbxo42, Slco5a1, Baz2b, Tet1, Nap1l5, Mtdh, Eaf1, Ovol2, Acp2, Calu, Eya2, P4ha1, Pnn, Snai2, Parp16, Ube2i, Sdad1, Lrrc3, Cpne5, Lrrfp2, Pgm2, Pus10, Usp48, Kalrn, At13, Pcdh17, Zfp608, Sh3rf1, Lnp, Zdhhc20, Fa2h, Tmed10, Abcc4                                                                                                                                                                                                                                                                                                                                                                                                                                                                                                                                                                                                                                                                                                                                                                                                                                                                                                                                                                                                                                                                                                                                                                                                                                                                                                                                                                                                                                                                                                                                                                                                                                                                                                                                                                                                                                                                                                                                                                                                                                                                                                                                                                                                                                                                                                                                                                                             |
| mmu-miR-379                  | Sema3a, Fbxo32, Fst, Edem3, Gria2, Map3k1, Pcdh17, Abcc4, Edn1, Htr1d, Pde2a, Ube2e3, Homer2, 5930434B04Rik                                                                                                                                                                                                                                                                                                                                                                                                                                                                                                                                                                                                                                                                                                                                                                                                                                                                                                                                                                                                                                                                                                                                                                                                                                                                                                                                                                                                                                                                                                                                                                                                                                                                                                                                                                                                                                                                                                                                                                                                                                                                                                                                                                                                                                                                                                                                                                                                                                                                                                                                                                                                                                                                                                                                                                                                                                                                                                                                                                                                                                                                                                                                                            |

|                            |                                                                                                                                                                                                                                                                                                                                                                                                                                                                                                                                                                                                                                                                                                                                                                                                                                                                       |
|----------------------------|-----------------------------------------------------------------------------------------------------------------------------------------------------------------------------------------------------------------------------------------------------------------------------------------------------------------------------------------------------------------------------------------------------------------------------------------------------------------------------------------------------------------------------------------------------------------------------------------------------------------------------------------------------------------------------------------------------------------------------------------------------------------------------------------------------------------------------------------------------------------------|
| mmu-miR-384-5p             | Adamts9, Mex3b, Pawr, Adam9, Dmd, Ednrb, Fxr1, Gfpt2, Gnai2, Kif3a, Myo5a, Ctnnd2, P4ha2, Sypl, Twf1, Rarg, Sema3a, Erlin1, Kctd8, Vat1l, Fkbp3, Usp2, B4galt6, Sec61a2, Polr3g, Fbxo32, Zfp706, Elovl5, Kctd5, 3110043O21Rik, Jakmip2, Faf2, 2310046O06Rik, Bcl2l13, Mfsd6, Sall4, Sema6d, Reep3, Atad2b, Brwd3, Celsr3, Gpt2, Bcl6, Cbx2, Epb4.1l3, Fst, Mab21l1, Smad1, Nid1, Ocln, Pip4k2a, Ppp3cb, Rwdd4a, Ptpn13, Rps6ka2, Surf4, Tcp1l12, Usp49, Mkrn3, Cdh20, Cadps, Zbtb11, Lrrc58, Abi2, Dll4, Pcd10, Arl6ip6, Edem3, Rffl, Ube2v2, Brap, Ube2ql1, Gria2, Mat2a, Map3k1, Zfp275, Stk39, Dlg5, Larp1, Ranbp10, Kif21b, Fbxo42, Slco5a1, Baz2b, Tet1, Nap1l5, Mtdh, Eaf1, Ovol2, Acp2, Calu, Eya2, P4ha1, Pnn, Snai2, Parp16, Ube2i, Sdad1, Lrrc3, Cpne5, Lrrfip2, Pgm2, Pus10, Usp48, Kalrn, At13, Pcdh17, Zfp608, Sh3rf1, Lnp, Zdhhc20, Fa2h, Tmed10, Abcc4 |
|                            |                                                                                                                                                                                                                                                                                                                                                                                                                                                                                                                                                                                                                                                                                                                                                                                                                                                                       |
|                            |                                                                                                                                                                                                                                                                                                                                                                                                                                                                                                                                                                                                                                                                                                                                                                                                                                                                       |
| <b>Up-regulated miRNAs</b> |                                                                                                                                                                                                                                                                                                                                                                                                                                                                                                                                                                                                                                                                                                                                                                                                                                                                       |
| <i>miRNA ID</i>            | <i>Enriched target gene</i>                                                                                                                                                                                                                                                                                                                                                                                                                                                                                                                                                                                                                                                                                                                                                                                                                                           |

mmu-miR-7a

Nhsl2, Nfxl1, Zfp282, Rpusd3, B630005N14Rik, A130022J15Rik, Fbxl14, Spred3, Agpat6, Dcun1d2, Cd276, Cdh22, Sbk1, Aldh6a1, Tecpr2, Rab15, Iars, Rnf44, Dusp22, AW549877, Dhx57, 2010002N04Rik, Gpr137, Unc5a, Lgr4, Chd4, Olr1, Prkaa2, Prkab2, Galnt2, B3gnt1, Uhrf2, Chd9, Rnf20, Txlna, Braf, Hd1bp, Lmx1a, Slc8a2, Hmga1-rs1, EglN2, Abcg1, Foxp2, Acta1, Acvr1b, Acvr2a, Adrb2, Adrb3, Ankfy1, Ap1s1, Speg, Aqp4, Bach1, Bcap29, Bcat1, Bcl2l1, Prdm1, Bsn, Cacna1d, Calm1, Cap1, Cask, Casp3, Cbx2, Cbx5, Ccnd1, Ccnd2, Cd86, Cdc25a, Chrd, Socs1, Tpp1, Cmah, Ccr7, Coil, Col14a1, Col15a1, Col3a1, Col4a1, Col4a2, Col4a5, Col5a2, Col1a2, Cpd, Crk, Cry2, Cyp46a1, Ddn, Dmd, Dmp1, Dnajc1, Arid3a, Dyrk1a, E2f5, Eda, Edn1, Ddx19a, Eif4g2, Epha3, Epha4, Esr2, Smarcd1, Igf2bp3, Ezh2, Fasl, Fgf4, Fgf5, Frk, Gabpa, Gabra6, Galnt1, Gas7, Mtpn, Nr6a1, Gdap2, Ghr, Gnal, Gng5, Grik2, Grin2b, Gtf2i, Hand1, Has2, Hic1, Hk2, Hmga1, Hmga2, Hoxd1, Htr4, Igf1r, Il10, Il13, Il6, Lrig1, Insr, Kcnc3, Khgrp, Kif21b, Klkb1, Kpna1, Lalba, Limk2, Sh2b3, Lor, Peg10, Slc24a6, Ppargc1b, Grid2ip, Mxd1, Masp1, Mdfi, Mllt10, Ndst2, Meis2, Meis3, Grpel2, Myo1f, Nefm, Ngf, Nid2, Nlk, Mycn, Nras, Nrtm, Ntn1, Osmr, P2rx1, P4ha2, Pldn, Pak1, Pappa, Pbx1, Pbx2, Pbx3, Pcx, Pdgfb, Piga, Pld3, Prrx1, Ppara, Ppargc1a, Mobk3, Mapk11, Prlr, Socs7, Edem1, Dusp1, Pla2g15, Ptprd, Ptpn, Igdcc3, Rasgrp1, Tet3, Rb1, Rbpj, Rcn1, Rdx, Dpf2, Rgs16, Rnf7, Rorc, Sub1, Rrm2, Scd2, Scn5a, Scn8a, Msr1, Sema4c, Sema4f, Ostf1, St6gal1, St8sia1, Clpb, Skil, Slc31a1, Smarcc1, Snap23, Snn, Sox13, Sall3, Strbp, Dtx4, Wdr37, Gramd1c, Sreb2, Dot1l, Slk, Prrg3, Dock3, Cpeb3, Zc3hav1, Stx3, Snx30, Zfp710, Igsf1, Lcorl, Tmc7, Syt1, Syt2, Tmem194, Trim41, Fam123c, Trib1, Plekhh1, Pde12, Zfyve26, Dcaf15, Lcor, Pqlc2, Mfsd4, Plekhg6, Tarbp2, Tbx5, Zfp354a, Nipal4, Tet2, Tcf7l1, Etnk2, Hip1, C330019G07Rik, Lrrc20, Cdc34, Eea1, 9-Mar, Pik3ip1, Fnip1, Tead3, Tead4, Wnt9a, Taok1, Hlf, Trib2, Pacs2, Tgfb1, Tgfb3, Thbs1, Thrsp, Tia1, Gcnt4, Marveld2, Timm17b, Slc4a7, Sec24c, D14Abb1e, Pcdh20, Tnfaip3, Tnfrsf1b, Usp12, Ucg, Utrn, Farp1, Zc3h3, 5031439G07Rik, Gxylt1, Wnt1, Fam43a, Wnt9b, Impg2, Xk, Rab40c, Uhrf1bp1, Btdb9, Abcc10, Dlgap1, Map4k3, Thoc1, Ammccr1, Apbb3, Cep120, Rnf165, Lrfn4, Trpm6, Fam178a, Yod1, Ahctf1, Zfp2, Vash2, B3gnt7, Ikzf2, Slc30a1, Slc35c1, Frmd5, Btdb3, Dlgap4, Ppp1r16b, Npepl1, Zbtb10, Ythdf3, Syt11, Pogz, Slc25a24, B230312A22Rik, Zbtb5, Ikbkap, Acer2, Slc5a9, Zfp362, Fras1, Frmd4b, Slc6a1, Dcun1d3, Psd3, Ddx19b, Tmem231, Adamts15, Zbtb16, Lingo1, Rab8b, Prtg, Ddx26b, Pcyt1b, Nxt2, Adamts14, Trhde, Ankrd52, Pla2g3, Ankrd43, Usp32, Adamts5, Akap6, Fam160b2, Adamts12, Rspo2, Mgl1, Nek3, Smcr7l, Klhl6, Liph, Lmln, Gpr156, Arid1b, Scn11a, Ccnj, Slco5a1, Tor1aip2, Scyl3, Crb2, Tspan18, Slc7a14, Frem2, Zfp697, Gdf6, Zfp462, Klhl9, Gpatch3, E2f2, Napepld, Tmprss11f, Sbn1, Stard13, Styk1, Arhgap20, Tnfaip8l3, C230081A13Rik, Klhl31, Klfb, Trappc1, Onecut3, Srgap3, Gga3, Esrrb, Spata2, Map3k1, Mapk8, Sema4g, Homer2, Rab11fip4, Greb1, Slc38a9, 9930012K11Rik, B3galt1, Arhgap28, Dagla, Mgat4a, Cep110, Map4k4, Acvr1c, Znf512b, Trpc7, Lrig2, Vsnl1, Gpr157, Nat8l, AU019823, Rab6b, Mbtps2, Zfp275, Rpusd2, X99384, Dnajb9, Abcc5, Rasl10b, Nynrin, Klhl23, Efh2, Ubf1, D11Wsu99e, Limd1, Ulk2, Adamts8, Fbxl12, Fndc3a, Pld5, Dusp4, Hif1an, Igf2bp2, Apba1, Ercc6, Ugg2, Nceh1, Zbtb39, Zmat4, Lrrc58, Senp5, Iqcb1, Lrig3, Trank1, Ubn2, Phf8, Zbtb26, Pptc7, Slc26a9, Rfx6, Cdv3, Frs2, Pitpnm3, Gfod1, Zfp516, 8430427H17Rik, Fnip2, Al464131, Usp24, Acot11, Slc5a6, Sdk1, D630045J12Rik, Trim67, Thoc2, Kcnk18, Slc2a12, Col27a1, Serf2, Lin28b, Obscn, Begain, Mll2, Greb1l, 5930434B04Rik, Xkr8, Cep135, Pdp2, Scn4b, Fam84b, Taf9b, Gnptab, Nlrc5, Arhgef15, E2f6, Ero1l, Tmprss2, Dlc1, Mapk6, Dkk3, Tmod2, Rragd, Reep1, Atxn1l, Zfp644, Ruffy3, Tmx4, D1Bwg0212e, Hif3a, Nap1l1, Cpsf4, Nme6, Slc4a4, Plagl2, Plxnc1, Arid3c, Rbm38, Tspan5, Styx, Mycbp, Abcb9, Arid3b, 1500003O03Rik, Syncrip, Ikbke, Ankrd49, Rbms2, Nme4, Habp4, Crtap, Igdcc4, Vav3, Tob2, Psors1c2, Golga7, Cd200r1, Bin3, Hic2, Fam184b, Arpp19, Fign, Kctd21, Trim71, Ralb, Zfp280b, Suv39h2, Tsc1, Cldn12, Tmem167, Arrdc4, Pcp4l1, Nova1, Tnik, Gdpd1, Dzip1, Abi3, Atg4b, Tmem41a, Dcbl1, Spryd4, Slc16a9, 1200014J11Rik, Riok3, Bzw1, Bzw2, Prpf38b, Golt1b, Edem3, Nkap, Polr3d, Gatm, Lipt2, Cap2, Brd3, Ergic1, 1810074P20Rik, Tll4, Stx17, Fbxo32, Gpatch2, Plxnd1, Limd2, Ubxn4, Gipc1, Zcchc3, Ccny, Trabd, Aen, Cgnl1, Fam135a, Leprotl1, Al846148, 0610030E20Rik, Adipor2, Nsmce2, Ppm1f, Letmd1, Tab2, Zfp740, Ddi2, Vps26b, 2200002K05Rik, Snx5, Tmem110, Pcgf3, Fam83g, Pxdn, Ints2, Slc35d2, Naa30, Dusp16, Tspan2, Prss22, Pgm2l1, Stox2, Zfp689, Golga7b, Col24a1, Ing3, Slc16a14, Cpa4, Slc25a18, Fbxo30, Ppapdc1b, Nkiras2, Ppp2r2a, Fndc3b, Cyb561d1, Tsc22d2, Cnot2, Lsm11, 2410042D21Rik, Ppme1, 2810030E01Rik, B3gat3, Kctd17, Slc22a23, Tmed5, Tbkbp1, Wasl, Xpot, Fam118a, 1700052N19Rik, Vgll3, Ppp2r1b, 1110012D08Rik, Slc25a27, Nphp3, Armc8, Sec14l1, Crct1, Stk40, Dtx2, 1700017B05Rik, Gale, 4931428F04Rik, Lonrf3, Ppapdc2, Zswim5, Snx16, Usp38, Tmem65, Usp47, Rab11fip2, Dpp3, Etnk1, Arl5a, Gns, Slc10a6, Klhl24, Senp2, 6230409E13Rik, Stard3nl, Tgds, Clasp2, Slc10a7, Eif2c4, Atg16l1, Bcl7a, Rnf170, Lbh, Hook1, Klhdc8b, Rictor, Dlst, Chsy3, Spnb4, Tusc2, Med8, Mesdc1, Zfp202, Arl4d, Ndst3, Ctms, Lin28a, Elovl4, Slc12a9, Tmem2, Kremen1, Sec16b, Entpd7, Gpr45, Brwd1, Cecr6, Trim33, Cnrm4, Qars, Lbr, Rdh10, Clp1, Cercam, Sall4, Kcnc4

|            |                                                                                                                                                                                                                                                                                                                                                                                                                                                                                                                                                                                                                                                                                                                                                                                                                                                                                                                                                                                                                                                                                                                                                                                                                                                                                                                                                                                                                                                                                                                                                                                                                                                                                                                                                                                                                                                                                                                                                                                                                                                                                                                                                                                                                                                                                                                                                                                                                                                                                                                                                                                                                                                                                                                                                                                                                                                                                                                                                                                                                                                                                                                                                                                                                                                                                                                                                                                                                                                                                                                                                                                                                                                                                                                                                                                                                                                                                                                                                                                                                                                                                                                                                                                                                                                                                                                                                                                                                                                                                                                                                                                                                                                                                                                                                                                                                                                                                                                                                                                                                                                                                                                                                                                                                                                                                                                                                                                                                                                                                                                                                                                                                                                                                                    |
|------------|----------------------------------------------------------------------------------------------------------------------------------------------------------------------------------------------------------------------------------------------------------------------------------------------------------------------------------------------------------------------------------------------------------------------------------------------------------------------------------------------------------------------------------------------------------------------------------------------------------------------------------------------------------------------------------------------------------------------------------------------------------------------------------------------------------------------------------------------------------------------------------------------------------------------------------------------------------------------------------------------------------------------------------------------------------------------------------------------------------------------------------------------------------------------------------------------------------------------------------------------------------------------------------------------------------------------------------------------------------------------------------------------------------------------------------------------------------------------------------------------------------------------------------------------------------------------------------------------------------------------------------------------------------------------------------------------------------------------------------------------------------------------------------------------------------------------------------------------------------------------------------------------------------------------------------------------------------------------------------------------------------------------------------------------------------------------------------------------------------------------------------------------------------------------------------------------------------------------------------------------------------------------------------------------------------------------------------------------------------------------------------------------------------------------------------------------------------------------------------------------------------------------------------------------------------------------------------------------------------------------------------------------------------------------------------------------------------------------------------------------------------------------------------------------------------------------------------------------------------------------------------------------------------------------------------------------------------------------------------------------------------------------------------------------------------------------------------------------------------------------------------------------------------------------------------------------------------------------------------------------------------------------------------------------------------------------------------------------------------------------------------------------------------------------------------------------------------------------------------------------------------------------------------------------------------------------------------------------------------------------------------------------------------------------------------------------------------------------------------------------------------------------------------------------------------------------------------------------------------------------------------------------------------------------------------------------------------------------------------------------------------------------------------------------------------------------------------------------------------------------------------------------------------------------------------------------------------------------------------------------------------------------------------------------------------------------------------------------------------------------------------------------------------------------------------------------------------------------------------------------------------------------------------------------------------------------------------------------------------------------------------------------------------------------------------------------------------------------------------------------------------------------------------------------------------------------------------------------------------------------------------------------------------------------------------------------------------------------------------------------------------------------------------------------------------------------------------------------------------------------------------------------------------------------------------------------------------------------------------------------------------------------------------------------------------------------------------------------------------------------------------------------------------------------------------------------------------------------------------------------------------------------------------------------------------------------------------------------------------------------------------------------------------------------------------------------------|
| mmu-miR-7b | <p>Nhs12, Nfxl1, Zfp282, Rpusd3, B630005N14Rik, A130022J15Rik, Fbxl14, Spred3, Agpat6, Dcun1d2, Cd276, Cdh22, Sbk1, Aldh6a1, Tecpr2, Rab15, Iars, Rnf44, Dusp22, AW549877, Dhx57, 2010002N04Rik, Gpr137, Unc5a, Lgr4, Chd4, Olr1, Prkaa2, Prkab2, Galnt2, B3gnt1, Uhrf2, Chd9, Rnf20, Txlna, Braf, Hd1bp, Lmx1a, Slc8a2, Hmga1-rs1, Egl2, Abcg1, Foxp2, Acta1, Acvr1b, Acvr2a, Adrb2, Adrb3, Ankfy1, Ap1s1, Speg, Aqp4, Bach1, Bcap29, Bcat1, Bcl2l1, Prdm1, Bsn, Cacna1d, Calm1, Cap1, Cask, Casp3, Cbx2, Cbx5, Ccnd1, Ccnd2, Cd86, Cdc25a, Chrd, Socs1, Tpp1, Cmaha, Ccr7, Coil, Col14a1, Col15a1, Col3a1, Col4a1, Col4a2, Col4a5, Col5a2, Col1a2, Cpd, Crk, Cry2, Cyp46a1, Ddn, Dmd, Dmp1, Dnajc1, Arid3a, Dyrk1a, E2f5, Eda, Edn1, Ddx19a, Eif4g2, Epha3, Epha4, Esr2, Smarcd1, Igfbp3, Ezh2, Fasl, Fgf4, Fgf5, Frk, Gabpa, Gabra6, Galnt1, Gas7, Mtpn, Nr6a1, Gdap2, Ghr, Gnal, Gng5, Grik2, Grin2b, Gtf2i, Hand1, Has2, Hic1, Hk2, Hmga1, Hmga2, Hoxd1, Htra4, Igf1r, Il10, Il13, Il6, Lrig1, Insr, Kcnc3, Khsrp, Kif21b, Klkb1, Kpna1, Lalba, Limk2, Sh2b3, Lor, Peg10, Slc24a6, Ppargc1b, Grid2ip, Mxd1, Masp1, Mdfi, Mllt10, Mmp11, Ndst2, Meis2, Meis3, Grpel2, Myo1f, Nefm, Ngf, Nid2, Nlk, Mycn, Nras, Nrtn, Ntn1, Osmr, P2rx1, P4ha2, Pldn, Pak1, Pappa, Pbx1, Pbx2, Pbx3, Pcx, Pdgfb, Piga, Pld3, Prrx1, Ppara, Ppargc1a, Mobk13, Mapk11, Prlr, Socs7, Edem1, Dusp1, Pla2g15, Ptprd, Ptpru, Igdcc3, Rasgrp1, Tet3, Rb1, Rbpj, Rcn1, Rdx, Dpf2, Rgs16, Rnf7, Rorc, Sub1, Rrm2, Scd2, Scn5a, Scn8a, Msr1, Sema4c, Sema4f, Ostf1, St6gal1, St8sia1, Clpb, Skil, Slc31a1, Smarcc1, Snap23, Snn, Sox13, Sall3, Strbp, Dtx4, Wdr37, Gramd1c, Sreb2, Dot1l, Slk, Prrg3, Dock3, Cpeb3, Zc3hav1l, Stx3, Snx30, Zfp710, Igsf1, Lcorl, Tmc7, Syt1, Syt2, Tmem194, Trim41, Fam123c, Trib1, Plekhh1, Pde12, Zfyve26, Dcaf15, Lcor, Pqlc2, Mfsd4, Plekhg6, Tarbp2, Tbx5, Zfp354a, Nipal4, Tet2, Tcf7l1, Etnk2, Hip1, C330019G07Rik, Lrrc20, Cdc34, Eea1, 9-Mar, Pik3ip1, Fnip1, Tead3, Tead4, Wnt9a, Taok1, Hlf, Trib2, Pacs2, Tgfb1, Tgfb3, Thbs1, Thrsp, Tia1, Gcnt4, Marveld2, Timm17b, Slc4a7, Sec24c, D14Abb1e, Pcdh20, Tnfaip3, Tnfrsf1b, Usp12, Ugcg, Utrn, Farp1, Zc3h3, 5031439G07Rik, Gxylt1, Wnt1, Fam43a, Wnt9b, Impg2, Xk, Rab40c, Uhrf1bp1, Btdb9, Abcc10, Dlgap1, Map4k3, Thoc1, Ammecr1, Apbb3, Cep120, Rnf165, Lrfn4, Trpm6, Fam178a, Yod1, Ahctf1, Zfp2, Vash2, B3gnt7, Ikb2, Slc30a1, Slc35c1, Frmd5, Btdb3, Dlgap4, Ppp1r16b, Npepl1, Zbtb10, Ythdf3, Syt11, Pogz, Slc25a24, B230312A22Rik, Zbtb5, Ikbkap, Aker2, Slc5a9, Zfp362, Fras1, Frmd4b, Slc6a1, Dcun1d3, Psd3, Ddx19b, Tmem231, Adamts15, Zbtb16, Lingo1, Rab8b, Prtg, Ddx26b, Pcyt1b, Nxt2, Adamts14, Trhde, Ankrd52, Pla2g3, Ankrd43, Usp32, Adamts5, Akap6, Fam160b2, Adamts12, Rspo2, Mgl1, Nek3, Smcr7l, Klhl6, Liph, Lmln, Gpr156, Arid1b, Scn11a, Ccnj, Slco5a1, Tor1aip2, Scyl3, Crb2, Tspan18, Slc7a14, Frem2, Zfp697, Gdf6, Zfp462, Klhl9, Gpatch3, E2f2, Napepld, Tmprss11f, Sbn1, Stard13, Styk1, Arhgap20, Tnfaip8l3, C230081A13Rik, Klhl31, Klf8, Trappc1, Onecut3, Srgap3, Gga3, Esrrb, Spata2, Map3k1, Mapk8, Sema4g, Homer2, Rab11fip4, Greb1, Slc38a9, 9930012K11Rik, B3galt1, Arhgap28, Dagla, Mgat4a, Cep110, Map4k4, Acvr1c, Znf512b, Trpc7, Lrig2, Vsnl1, Gpr157, Nat8l, AU019823, Rab6b, Mbtps2, Zfp275, Rpusd2, X99384, Dnajb9, Abcc5, Ras110b, Nynrin, Klhl23, Efh2, Ubfd1, D11Wsu99e, Limd1, Ulk2, Adamts8, Fbxl12, Fndc3a, Pld5, Dusp4, Hif1an, Igfbp2, Apba1, Ercc6, Ugg1, Nceh1, Zbtb39, Zmat4, Lrrc58, Senp5, Iqcb1, Lrig3, Trank1, Ubn2, Phf8, Zbtb26, Pptc7, Slc26a9, Rfx6, Cdv3, Frs2, Pitpnm3, Gfod1, Zfp516, 8430427H17Rik, Fnip2, Al464131, Usp24, Acot11, Slc5a6, Sdk1, D630045J12Rik, Trim67, Thoc2, Kcnk18, Slc2a12, Col27a1, Serf2, Lin28b, Obscn, Begain, Mli2, Greb1, 5930434B04Rik, Xkr8, Cep135, Pdp2, Scn4b, Fam84b, Taf9b, Gnptab, Nlrc5, Arhgef15, E2f6, Ero1l, Tmprss2, Dlc1, Mapk6, Dkk3, Tmod2, Rragd, Reep1, Atxn1l, Zfp644, Rufy3, Tmx4, D1Bwg0212e, Hif3a, Nap11l, Cpsf4, Nme6, Slc4a4, Plagl2, Plxnc1, Arid3c, Rbm38, Tspan5, Styx, Mycbp, Abcb9, Arid3b, 1500003O03Rik, Syncrip, Ikbke, Elf4, Ankrd49, Rbms2, Nme4, Habp4, Crtpa, Igdcc4, Vav3, Tob2, Psors1c2, Golga7, Cd200r1, Bin3, Hic2, Fam184b, Arpp19, Fign, Kctd21, Trim71, Ralb, Zfp280b, Suv39h2, Tsc1, Cldn12, Tmem167, Arrdc4, Pcp4l1, Nova1, Tnik, Gdpd1, Dzip1, Abi3, Atg4b, Tmem41a, Dcbld1, Spryd4, Slc16a9, 1200014J11Rik, Riok3, Bzw1, Bzw2, Prpf38b, Golt1b, Edem3, Nkap, Polr3d, Gatm, Lipt2, Cap2, Brd3, Ergic1, 1810074P20Rik, Tll4, Stx17, Fbxo32, Gpatch2, Plxnd1, Limd2, Ubxn4, Gipc1, Zcchc3, Ccny, Trabd, Aen, Cgnl1, Fam135a, Leprotl1, Al846148, 0610030E20Rik, Adipor2, Nsmce2, Ppm1f, Letmd1, Tab2, Zfp740, Ddi2, Vps26b, 2200002K05Rik, Snx5, Tmem110, Pcgf3, Fam83g, Pxdn, Ints2, Slc35d2, Naa30, Dusp16, Tspan2, Prss22, Pgm2l1, Stox2, Zfp689, Golga7b, Col24a1, Ing3, Slc16a14, Cpa4, Slc25a18, Fbxo30, Ppapdc1b, Nkiras2, Ppp2r2a, Fndc3b, Cyb561d1, Tsc22d2, Cnot2, Lsm11, 2410042D21Rik, Ppme1, 2810030E01Rik, B3gat3, Kctd17, Slc22a23, Tmed5, Tkbkbp1, Wasl, Xpot, Fam118a, 1700052N19Rik, Vgll3, Ppp2r1b, 1110012D08Rik, Slc25a27, Nphp3, Armc8, Sec14l1, Crct1, Stk40, Dtx2, 1700017B05Rik, Gale, 4931428F04Rik, Lonrf3, Ppapdc2, Zswim5, Snx16, Usp38, Tmem65, Usp47, Rab11fip2, Dpp3, Etnk1, Arl5a, Gns, Slc10a6, Klhl24, Senp2, 6230409E13Rik, Stard3nl, Tgds, Clasp2, Slc10a7, Eif2c4, Atg16l1, Bcl7a, Rnf170, Lbh, Hook1, Klhdc8b, Rictor, Dist, Chsy3, Spnb4, Tusc2, Med8, Mesdc1, Zfp202, Arl4d, Ndst3, Cttns, Lin28a, Elovl4, Slc12a9, Tmem2, Kremen1, Sec16b, Entpd7, Gpr45, Brwd1, Cecr6, Trim33, Cnrm4, Qars, Lbr, Rdh10, Clp1, Cercam, Sall4, Kcnc4</p> |
|------------|----------------------------------------------------------------------------------------------------------------------------------------------------------------------------------------------------------------------------------------------------------------------------------------------------------------------------------------------------------------------------------------------------------------------------------------------------------------------------------------------------------------------------------------------------------------------------------------------------------------------------------------------------------------------------------------------------------------------------------------------------------------------------------------------------------------------------------------------------------------------------------------------------------------------------------------------------------------------------------------------------------------------------------------------------------------------------------------------------------------------------------------------------------------------------------------------------------------------------------------------------------------------------------------------------------------------------------------------------------------------------------------------------------------------------------------------------------------------------------------------------------------------------------------------------------------------------------------------------------------------------------------------------------------------------------------------------------------------------------------------------------------------------------------------------------------------------------------------------------------------------------------------------------------------------------------------------------------------------------------------------------------------------------------------------------------------------------------------------------------------------------------------------------------------------------------------------------------------------------------------------------------------------------------------------------------------------------------------------------------------------------------------------------------------------------------------------------------------------------------------------------------------------------------------------------------------------------------------------------------------------------------------------------------------------------------------------------------------------------------------------------------------------------------------------------------------------------------------------------------------------------------------------------------------------------------------------------------------------------------------------------------------------------------------------------------------------------------------------------------------------------------------------------------------------------------------------------------------------------------------------------------------------------------------------------------------------------------------------------------------------------------------------------------------------------------------------------------------------------------------------------------------------------------------------------------------------------------------------------------------------------------------------------------------------------------------------------------------------------------------------------------------------------------------------------------------------------------------------------------------------------------------------------------------------------------------------------------------------------------------------------------------------------------------------------------------------------------------------------------------------------------------------------------------------------------------------------------------------------------------------------------------------------------------------------------------------------------------------------------------------------------------------------------------------------------------------------------------------------------------------------------------------------------------------------------------------------------------------------------------------------------------------------------------------------------------------------------------------------------------------------------------------------------------------------------------------------------------------------------------------------------------------------------------------------------------------------------------------------------------------------------------------------------------------------------------------------------------------------------------------------------------------------------------------------------------------------------------------------------------------------------------------------------------------------------------------------------------------------------------------------------------------------------------------------------------------------------------------------------------------------------------------------------------------------------------------------------------------------------------------------------------------------------------------------------------------|



|            |                                                                                                                                                                                                                                                                                                                                                                                                                                                                                                                                                                                                                                                                                                                                                                                                                                                                                                                                                                                                                                                                                                                                                                                                                                                                                                                                                                                                                                                                                                                                                                                                                                                                                                                                                                                                                                                                                                                                                                                                                                                                                                                                                                                                                                                                                                                                                                                                                                                                                                                                                                                                                                                                                                                                                                                                                                                                                                                                                                                                                                                                                                                                                                                                                                                                                                                                                                                                                                                                                                                                                                                                                                                                                                                                                                                                                                                                                                                                                                                                                                                                                                                                                                                                                                                                                                                                                                                                                                                                                                                                                                                                                                                                                                                                                                                                                                                                                                                                                                                                                                                                                                                                                                                                                                                                                                                                                                                                                                                                                                                                                                                                                                                                                                 |
|------------|-------------------------------------------------------------------------------------------------------------------------------------------------------------------------------------------------------------------------------------------------------------------------------------------------------------------------------------------------------------------------------------------------------------------------------------------------------------------------------------------------------------------------------------------------------------------------------------------------------------------------------------------------------------------------------------------------------------------------------------------------------------------------------------------------------------------------------------------------------------------------------------------------------------------------------------------------------------------------------------------------------------------------------------------------------------------------------------------------------------------------------------------------------------------------------------------------------------------------------------------------------------------------------------------------------------------------------------------------------------------------------------------------------------------------------------------------------------------------------------------------------------------------------------------------------------------------------------------------------------------------------------------------------------------------------------------------------------------------------------------------------------------------------------------------------------------------------------------------------------------------------------------------------------------------------------------------------------------------------------------------------------------------------------------------------------------------------------------------------------------------------------------------------------------------------------------------------------------------------------------------------------------------------------------------------------------------------------------------------------------------------------------------------------------------------------------------------------------------------------------------------------------------------------------------------------------------------------------------------------------------------------------------------------------------------------------------------------------------------------------------------------------------------------------------------------------------------------------------------------------------------------------------------------------------------------------------------------------------------------------------------------------------------------------------------------------------------------------------------------------------------------------------------------------------------------------------------------------------------------------------------------------------------------------------------------------------------------------------------------------------------------------------------------------------------------------------------------------------------------------------------------------------------------------------------------------------------------------------------------------------------------------------------------------------------------------------------------------------------------------------------------------------------------------------------------------------------------------------------------------------------------------------------------------------------------------------------------------------------------------------------------------------------------------------------------------------------------------------------------------------------------------------------------------------------------------------------------------------------------------------------------------------------------------------------------------------------------------------------------------------------------------------------------------------------------------------------------------------------------------------------------------------------------------------------------------------------------------------------------------------------------------------------------------------------------------------------------------------------------------------------------------------------------------------------------------------------------------------------------------------------------------------------------------------------------------------------------------------------------------------------------------------------------------------------------------------------------------------------------------------------------------------------------------------------------------------------------------------------------------------------------------------------------------------------------------------------------------------------------------------------------------------------------------------------------------------------------------------------------------------------------------------------------------------------------------------------------------------------------------------------------------------------------------------------------------------|
| mmu-miR-7c | <p>Nhs12, Nfxl1, Zfp282, Rpusd3, B630005N14Rik, A130022J15Rik, Fbxl14, Spred3, Agpat6, Dcun1d2, Cd276, Cdh22, Sbk1, Aldh6a1, Tecpr2, Rab15, Iars, Rnf44, Dusp22, AW549877, Dhx57, 2010002N04Rik, Gpr137, Unc5a, Lgr4, Chd4, Olr1, Prkaa2, Prkab2, Galnt2, B3gnt1, Uhrf2, Chd9, Rnf20, Txlna, Braf, Hd1bp, Lmx1a, Slc8a2, Hmga1-rs1, Eglnt2, Abcg1, Foxp2, Acta1, Acvr1b, Acvr2a, Adrb2, Adrb3, Ankfy1, Ap1s1, Speg, Aqp4, Bach1, Bcap29, Bcat1, Bcl2l1, Prdm1, Bsn, Cacna1d, Calm1, Cap1, Cask, Casp3, Cbx2, Cbx5, Ccnd1, Ccnd2, Cd86, Cdc25a, Chrd, Socs1, Tpp1, Cmah, Ccr7, Coil, Col14a1, Col15a1, Col3a1, Col4a1, Col4a2, Col4a5, Col5a2, Col1a2, Cpd, Crk, Cry2, Cyp46a1, Ddn, Dmd, Dmp1, Dnajc1, Arid3a, Dyrk1a, E2f5, Eda, Edn1, Ddx19a, Eif4g2, Epha3, Epha4, Esr2, Smarcd1, Igfbp3, Ezh2, Fasl, Fgf4, Fgf5, Frk, Gabpa, Gabra6, Galnt1, Gas7, Mtpn, Nr6a1, Gdap2, Ghr, Gnal, Gng5, Grik2, Grin2b, Gtf2i, Hand1, Has2, Hic1, Hk2, Hmga1, Hmga2, Hoxd1, Htr4, Igf1r, Il10, Il13, Il6, Lrig1, Insr, Kcnc3, Khsrp, Kif21b, Kikb1, Kpna1, Lalba, Limk2, Sh2b3, Lor, Peg10, Slc24a6, Ppargc1b, Grid2ip, Mxd1, Masp1, Mdfi, Mllt10, Mmp11, Ndst2, Meis2, Meis3, Grpel2, Myo1f, Nefm, Ngf, Nid2, Nlk, Mycn, Nras, Nrtn, Ntn1, Osmr, P2rx1, P4ha2, Pldn, Pak1, Pappa, Pbx1, Pbx2, Pbx3, Pcx, Pdgfb, Piga, Pld3, Prrx1, Ppara, Ppargc1a, Mobk13, Mapk11, Prlr, Socs7, Edem1, Dusp1, Pla2g15, Ptprd, Ptpru, Igdcc3, Rasgrp1, Tet3, Rb1, Rbpj, Rcn1, Rdx, Dpf2, Rgs16, Rnf7, Rorc, Sub1, Rrm2, Scd2, Scn5a, Scn8a, Msr1, Sema4c, Sema4f, Ostf1, St6gal1, St8sia1, Clpb, Skil, Slc31a1, Smarcc1, Snap23, Snn, Sox13, Sall3, Strbp, Dtx4, Wdr37, Gramd1c, Sreb2, Dot1l, Slk, Prrg3, Dock3, Cpeb3, Zc3hav1l, Stx3, Snx30, Zfp710, Igsf1, Lcorl, Tmc7, Syt1, Syt2, Tmem194, Trim41, Fam123c, Trib1, Plekhh1, Pde12, Zfyve26, Dcaf15, Lcor, Pqlc2, Mfsd4, Plekhg6, Tarbp2, Tbx5, Zfp354a, Nipal4, Tet2, Tcf7l1, Etnk2, Hip1, C330019G07Rik, Lrrc20, Cdc34, Eea1, 9-Mar, Pik3ip1, Fnip1, Tead3, Tead4, Wnt9a, Taok1, Hlf, Trib2, Pacs2, Tgfb1, Tgfb3, Thbs1, Thrsp, Tia1, Gcnt4, Marveld2, Timm17b, Slc4a7, Sec24c, D14Abb1e, Pcdh20, Tnfaip3, Tnfrsf1b, Usp12, Ugcg, Utrn, Farp1, Zc3h3, 5031439G07Rik, Gxylt1, Wnt1, Fam43a, Wnt9b, Impg2, Xk, Rab40c, Uhrf1bp1, Btbd9, Abcc10, Dlgap1, Map4k3, Thoc1, Ammecr1, Apbb3, Cep120, Rnf165, Lrfn4, Trpm6, Fam178a, Yod1, Ahctf1, Zfp2, Vash2, B3gnt7, Ikb2, Slc30a1, Slc35c1, Frmd5, Btbd3, Dlgap4, Ppp1r16b, Npepl1, Zbtb10, Ythdf3, Syt11, Pogz, Slc25a24, B230312A22Rik, Zbtb5, Ikbkap, Acr2, Slc5a9, Zfp362, Fras1, Frmd4b, Slc6a1, Dcun1d3, Psd3, Ddx19b, Tmem231, Adamts15, Zbtb16, Lingo1, Rab8b, Prtg, Ddx26b, Pcyt1b, Nxt2, Adamts14, Trhde, Ankrd52, Pla2g3, Ankrd43, Usp32, Adamts5, Akap6, Fam160b2, Adamts12, Rspo2, Mgl1, Nek3, Smcr7l, Kihl6, Liph, Lmln, Gpr156, Arid1b, Scn11a, Ccnj, Slco5a1, Tor1aip2, Scyl3, Crb2, Tspan18, Slc7a14, Frem2, Zfp697, Gdf6, Zfp462, Kihl9, Gpatch3, E2f2, Napepld, Tmprss11f, Sbn1, Stard13, Styk1, Arhgap20, Tnfaip8l3, C230081A13Rik, Kihl31, Klf8, Trappc1, Onecut3, Srgap3, Gga3, Esrrb, Spata2, Map3k1, Mapk8, Sema4g, Homer2, Rab11fip4, Greb1, Slc38a9, 9930012K11Rik, B3galt1, Arhgap28, Dagla, Mgat4a, Cep110, Map4k4, Acvr1c, Znf512b, Trpc7, Lrig2, Vsnl1, Gpr157, Nat8l, AU019823, Rab6b, Mbtps2, Zfp275, Rpusd2, X99384, Dnajb9, Abcc5, Ras110b, Nynrin, Kihl23, Efhd2, Ubfd1, D11Wsu99e, Limd1, Ulk2, Adamts8, Fbxl12, Fndc3a, Pld5, Dusp4, Hif1an, Igfbp2, Apba1, Ercc6, Ugg1, Nceh1, Zbtb39, Zmat4, Lrrc58, Senp5, Iqcb1, Lrig3, Trank1, Ubn2, Phf8, Zbtb26, Pptc7, Slc26a9, Rfx6, Cdv3, Frs2, Pitpnm3, Gfod1, Zfp516, 8430427H17Rik, Fnip2, Al464131, Usp24, Acot11, Slc5a6, Sdk1, D630045J12Rik, Trim67, Thoc2, Kcnk18, Slc2a12, Col27a1, Serf2, Lin28b, Obscn, Begain, Mli2, Greb1, 5930434B04Rik, Xkr8, Cep135, Pdp2, Scn4b, Fam84b, Taf9b, Gnptab, Nlrc5, Arhgef15, E2f6, Ero1l, Tmprss2, Dlc1, Mapk6, Dkk3, Tmod2, Rragd, Reep1, Atxn1l, Zfp644, Rufy3, Tmx4, D1Bwg0212e, Hif3a, Nap11l, Cpsf4, Nme6, Slc4a4, Plagl2, Plxnc1, Arid3c, Rbm38, Tspan5, Styx, Mycbp, Abcb9, Arid3b, 1500003O03Rik, Syncrip, Ikbke, Elf4, Ankrd49, Rbms2, Nme4, Habp4, Crtp, Igdcc4, Vav3, Tob2, Psors1c2, Golga7, Cd200r1, Bin3, Hic2, Fam184b, Arpp19, Fign, Kctd21, Trim71, Ralb, Zfp280b, Suv39h2, Tsc1, Cldn12, Tmem167, Arrdc4, Pcp4l1, Nova1, Tnik, Gdpd1, Dzip1, Abi3, Atg4b, Tmem41a, Dcbld1, Spryd4, Slc16a9, 1200014J11Rik, Riok3, Bzw1, Bzw2, Prpf38b, Golt1b, Edem3, Nkap, Polr3d, Gatm, Lipt2, Cap2, Brd3, Ergic1, 1810074P20Rik, Tll4, Stx17, Fbxo32, Gpatch2, Plxnd1, Limd2, Ubxn4, Gipc1, Zcchc3, Ccny, Trabd, Aen, Cgnl1, Fam135a, Leprotl1, Al846148, 0610030E20Rik, Adipor2, Nsmce2, Ppm1f, Letmd1, Tab2, Zfp740, Ddi2, Vps26b, 2200002K05Rik, Snx5, Tmem110, Pcgf3, Fam83g, Pxdn, Ints2, Slc35d2, Naa30, Dusp16, Tspan2, Prss22, Pgm2l1, Stox2, Zfp689, Golga7b, Col24a1, Ing3, Slc16a14, Cpa4, Slc25a18, Fbxo30, Ppapdc1b, Nkiras2, Ppp2r2a, Fndc3b, Cyb561d1, Tsc22d2, Cnot2, Lsm11, 2410042D21Rik, Ppme1, 2810030E01Rik, B3gat3, Kctd17, Slc22a23, Tmed5, Tkbkp1, Wasl, Xpot, Fam118a, 1700052N19Rik, Vgll3, Ppp2r1b, 1110012D08Rik, Slc25a27, Nphp3, Armc8, Sec14l1, Crct1, Stk40, Dtx2, 1700017B05Rik, Gale, 4931428F04Rik, Lonrf3, Ppapdc2, Zswim5, Snx16, Usp38, Tmem65, Usp47, Rab11fip2, Dpp3, Etnk1, Arl5a, Gns, Slc10a6, Kihl24, Senp2, 6230409E13Rik, Stard3nl, Tgds, Clasp2, Slc10a7, Eif2c4, Atg16l1, Bcl7a, Rnf170, Lbh, Hook1, Kihdc8b, Rictor, Dist, Chsy3, Spnb4, Tusc2, Med8, Mesdc1, Zfp202, Arl4d, Ndst3, Ctns, Lin28a, Elovl4, Slc12a9, Tmem2, Kremen1, Sec16b, Entpd7, Gpr45, Brwd1, Cecr6, Trim33, Cnrm4, Qars, Lbr, Rdh10, Clp1, Cercam, Sall4, Kcnc4</p> |
|------------|-------------------------------------------------------------------------------------------------------------------------------------------------------------------------------------------------------------------------------------------------------------------------------------------------------------------------------------------------------------------------------------------------------------------------------------------------------------------------------------------------------------------------------------------------------------------------------------------------------------------------------------------------------------------------------------------------------------------------------------------------------------------------------------------------------------------------------------------------------------------------------------------------------------------------------------------------------------------------------------------------------------------------------------------------------------------------------------------------------------------------------------------------------------------------------------------------------------------------------------------------------------------------------------------------------------------------------------------------------------------------------------------------------------------------------------------------------------------------------------------------------------------------------------------------------------------------------------------------------------------------------------------------------------------------------------------------------------------------------------------------------------------------------------------------------------------------------------------------------------------------------------------------------------------------------------------------------------------------------------------------------------------------------------------------------------------------------------------------------------------------------------------------------------------------------------------------------------------------------------------------------------------------------------------------------------------------------------------------------------------------------------------------------------------------------------------------------------------------------------------------------------------------------------------------------------------------------------------------------------------------------------------------------------------------------------------------------------------------------------------------------------------------------------------------------------------------------------------------------------------------------------------------------------------------------------------------------------------------------------------------------------------------------------------------------------------------------------------------------------------------------------------------------------------------------------------------------------------------------------------------------------------------------------------------------------------------------------------------------------------------------------------------------------------------------------------------------------------------------------------------------------------------------------------------------------------------------------------------------------------------------------------------------------------------------------------------------------------------------------------------------------------------------------------------------------------------------------------------------------------------------------------------------------------------------------------------------------------------------------------------------------------------------------------------------------------------------------------------------------------------------------------------------------------------------------------------------------------------------------------------------------------------------------------------------------------------------------------------------------------------------------------------------------------------------------------------------------------------------------------------------------------------------------------------------------------------------------------------------------------------------------------------------------------------------------------------------------------------------------------------------------------------------------------------------------------------------------------------------------------------------------------------------------------------------------------------------------------------------------------------------------------------------------------------------------------------------------------------------------------------------------------------------------------------------------------------------------------------------------------------------------------------------------------------------------------------------------------------------------------------------------------------------------------------------------------------------------------------------------------------------------------------------------------------------------------------------------------------------------------------------------------------------------------------------------------------|

|            |                                                                                                                                                                                                                                                                                                                                                                                                                                                                                                                                                                                                                                                                                                                                                                                                                                                                                                                                                                                                                                                                                                                                                                                                                                                                                                                                                                                                                                                                                                                                                                                                                                                                                                                                                                                                                                                                                                                                                                                                                                                                                                                                                                                                                                                                                                                                                                                                                                                                                                                                                                                                                                                                                                                                                                                                                                                                                                                                                                                                                                                                                                                                                                                                                                                                                                                                                                                                                                                                                                                                                                                                                                                                                                                                                                                                                                                                                                                                                                                                                                                                                                                                                                                                                                                                                                                                                                                                                                                                                                                                                                                                                                                                                                                                                                                                                                                                                                                                                                                                                                                                                                                                                                                                                                                                                                                                                                                                                                                                                                                                                                                                                                                                        |
|------------|------------------------------------------------------------------------------------------------------------------------------------------------------------------------------------------------------------------------------------------------------------------------------------------------------------------------------------------------------------------------------------------------------------------------------------------------------------------------------------------------------------------------------------------------------------------------------------------------------------------------------------------------------------------------------------------------------------------------------------------------------------------------------------------------------------------------------------------------------------------------------------------------------------------------------------------------------------------------------------------------------------------------------------------------------------------------------------------------------------------------------------------------------------------------------------------------------------------------------------------------------------------------------------------------------------------------------------------------------------------------------------------------------------------------------------------------------------------------------------------------------------------------------------------------------------------------------------------------------------------------------------------------------------------------------------------------------------------------------------------------------------------------------------------------------------------------------------------------------------------------------------------------------------------------------------------------------------------------------------------------------------------------------------------------------------------------------------------------------------------------------------------------------------------------------------------------------------------------------------------------------------------------------------------------------------------------------------------------------------------------------------------------------------------------------------------------------------------------------------------------------------------------------------------------------------------------------------------------------------------------------------------------------------------------------------------------------------------------------------------------------------------------------------------------------------------------------------------------------------------------------------------------------------------------------------------------------------------------------------------------------------------------------------------------------------------------------------------------------------------------------------------------------------------------------------------------------------------------------------------------------------------------------------------------------------------------------------------------------------------------------------------------------------------------------------------------------------------------------------------------------------------------------------------------------------------------------------------------------------------------------------------------------------------------------------------------------------------------------------------------------------------------------------------------------------------------------------------------------------------------------------------------------------------------------------------------------------------------------------------------------------------------------------------------------------------------------------------------------------------------------------------------------------------------------------------------------------------------------------------------------------------------------------------------------------------------------------------------------------------------------------------------------------------------------------------------------------------------------------------------------------------------------------------------------------------------------------------------------------------------------------------------------------------------------------------------------------------------------------------------------------------------------------------------------------------------------------------------------------------------------------------------------------------------------------------------------------------------------------------------------------------------------------------------------------------------------------------------------------------------------------------------------------------------------------------------------------------------------------------------------------------------------------------------------------------------------------------------------------------------------------------------------------------------------------------------------------------------------------------------------------------------------------------------------------------------------------------------------------------------------------------------------------------------|
| mmu-miR-7e | <p>Nhsl2, Nfxl1, Zfp282, Rpsud3, B630005N14Rik, A130022J15Rik, Fbxl14, Spred3, Agpat6, Dcun1d2, Cd276, Cdh22, Sbk1, Aldh6a1, Tecpr2, Rab15, lars, Rnf44, Dusp22, AW549877, Dhx57, 2010002N04Rik, Gpr137, Unc5a, Lgr4, Chd4, Olr1, Prkaa2, Prkab2, Galnt2, B3gnt1, Uhrf2, Chd9, Rnf20, Txlna, Braf, Hdlbp, Lmx1a, Slc8a2, Hmga1-rs1, EglN2, Abcg1, Foxp2, Acta1, Acvr1b, Acvr2a, Adrb2, Adrb3, Ankfy1, Ap1s1, Speg, Aqp4, Bach1, Bcap29, Bcat1, Bcl2l1, Prdm1, Bsn, Cacna1d, Calm1, Cap1, Cask, Casp3, Cbx2, Cbx5, Ccnd1, Ccnd2, Cd86, Cdc25a, Chrd, Socs1, Tpp1, Cmah, Ccr7, Coil, Col14a1, Col15a1, Col3a1, Col4a1, Col4a2, Col4a5, Col5a2, Col1a2, Cpd, Crk, Cry2, Cyp46a1, Ddn, Dmd, Dmp1, Dnajc1, Arid3a, Dyrk1a, E2f5, Eda, Edn1, Ddx19a, Eif4g2, Epha3, Epha4, Esr2, Smarcd1, Igf2bp3, Ezh2, Fasl, Fgf4, Fgf5, Frk, Gabpa, Gabra6, Galnt1, Gas7, Mtpn, Nr6a1, Gdap2, Ghr, Gnal, Gng5, Grik2, Grin2b, Gtf2i, Hand1, Has2, Hic1, Hk2, Hmga1, Hmga2, Hoxd1, Htr4, Igf1r, Il10, Il13, Il6, Lrig1, Insr, Kcnc3, Khgrp, Kif21b, Klkb1, Kpna1, Lalba, Limk2, Sh2b3, Lor, Peg10, Slc24a6, Ppargc1b, Grid2ip, Mxd1, Masp1, Mdfi, Mllt10, Ndst2, Meis2, Meis3, Grpel2, Myo1f, Nefm, Ngf, Nid2, Nlk, Mycn, Nras, Nrtm, Ntn1, Osmr, P2rx1, P4ha2, Pldn, Pak1, Pappa, Pbx1, Pbx2, Pbx3, Pcx, Pdgfb, Piga, Pld3, Prrx1, Ppargc1a, Mobkl3, Mapk11, Prlr, Socs7, Edem1, Dusp1, Pla2g15, Ptprd, Ptpru, Igdcc3, Rasgrp1, Tet3, Rb1, Rbpj, Rcn1, Rdx, Dpf2, Rgs16, Rnf7, Rorc, Sub1, Rrm2, Scd2, Scn5a, Scn8a, Msr1, Sema4c, Sema4f, Ostf1, St6gal1, St8sia1, Clpb, Skil, Slc31a1, Smarcc1, Snap23, Snn, Sox13, Sall3, Strbp, Dtx4, Wdr37, Gramd1c, Sreb2, Dot1l, Slk, Prrg3, Dock3, Cpeb3, Zc3hav1l, Stx3, Snx30, Zfp710, Igsf1, Lcorl, Tmc7, Syt1, Syt2, Tmem194, Trim41, Fam123c, Trib1, Plekhh1, Pde12, Zfyve26, Dcaf15, Lcor, Pqlc2, Mfsd4, Plekhg6, Tarbp2, Tbx5, Zfp354a, Nipal4, Tet2, Tcf7l1, Etnk2, Hip1, C330019G07Rik, Lrrc20, Cdc34, Eea1, 9-Mar, Pik3ip1, Fnip1, Tead3, Tead4, Wnt9a, Taok1, Hlf, Trib2, Pacs2, Tgfb1, Tgfb3, Thbs1, Thrsp, Tia1, Gcnt4, Marveld2, Timm17b, Slc4a7, Sec24c, D14Abb1e, Pcdh20, Tnfai3, Tnfrsf1b, Usp12, Ucg, Utrn, Farp1, Zc3h3, 5031439G07Rik, Gxylt1, Wnt1, Fam43a, Wnt9b, Impg2, Xk, Rab40c, Uhrf1bp1, Btdb9, Abcc10, Dlgap1, Map4k3, Thoc1, Ammccr1, Apbb3, Cep120, Rnf165, Lrfn4, Trpm6, Fam178a, Yod1, Ahctf1, Zfp2, Vash2, B3gnt7, Ikzf2, Slc30a1, Slc35c1, Frmd5, Btdb3, Dlgap4, Ppp1r16b, Npepl1, Zbtb10, Ythdf3, Syt11, Pogz, Slc25a24, B230312A22Rik, Zbtb5, Ikbkap, Acer2, Slc5a9, Zfp362, Fras1, Frmd4b, Slc6a1, Dcun1d3, Psd3, Ddx19b, Tmem231, Adamts15, Zbtb16, Lingo1, Rab8b, Prtg, Ddx26b, Pcyt1b, Nxt2, Adamts14, Trhde, Ankrd52, Pla2g3, Ankrd43, Usp32, Adamts5, Akap6, Fam160b2, Adamts12, Rspo2, Mgl1, Nek3, Smcr7l, Klhl6, Liph, Lmln, Gpr156, Arid1b, Scn11a, Ccnj, Slco5a1, Tor1aip2, Scyl3, Crb2, Tspan18, Slc7a14, Frem2, Zfp697, Gdf6, Zfp462, Klhl9, Gpatch3, E2f2, Napepld, Tmprss11f, Sbn1, Stard13, Styk1, Arhgap20, Tnfai3, C230081A13Rik, Klhl31, Klf8, Trappc1, Onecut3, Srgap3, Gga3, Esrrb, Spata2, Map3k1, Mapk8, Sema4g, Homer2, Rab11fip4, Greb1, Slc38a9, 9930012K11Rik, B3galt1, Arhgap28, Dagla, Mgat4a, Cep110, Map4k4, Acvr1c, Znf512b, Trpc7, Lrig2, Vsnl1, Gpr157, Nat8l, AU019823, Rab6b, Mbtps2, Zfp275, Rpsud2, X99384, Dnajb9, Abcc5, Rasl10b, Nynrin, Klhl23, Efh2, Ubf1, D11Wsu99e, Limd1, Ulk2, Adamts8, Fbxl12, Fndc3a, Pld5, Dusp4, Hif1an, Igf2bp2, Apba1, Ercc6, Ugg2, Nceh1, Zbtb39, Zmat4, Lrrc58, Senp5, Iqcb1, Lrig3, Trank1, Ubn2, Phf8, Zbtb26, Pptc7, Slc26a9, Rfx6, Cdv3, Frs2, Pitpnm3, Gfod1, Zfp516, 8430427H17Rik, Fnip2, Al464131, Usp24, Acot11, Slc5a6, Sdk1, D630045J12Rik, Trim67, Thoc2, Kcnk18, Slc2a12, Col27a1, Serf2, Lin28b, Obscn, Begain, Mll2, Greb1l, 5930434B04Rik, Xkr8, Cep135, Pdp2, Scn4b, Fam84b, Taf9b, Gnptab, Nlrc5, Arhgef15, E2f6, Ero1l, Tmprss2, Dlc1, Mapk6, Dkk3, Tmod2, Rragd, Reep1, Atxn1l, Zfp644, Ruffy3, Tmx4, D1Bwg0212e, Hif3a, Nap1l1, Cpsf4, Nme6, Slc4a4, Plagl2, Plxnc1, Arid3c, Rbm38, Tspan5, Styx, Mycbp, Abcb9, Arid3b, 1500003O03Rik, Syncrip, Ikbke, Elf4, Ankr49, Rbms2, Nme4, Habp4, Crtap, Igdcc4, Vav3, Tob2, Psors1c2, Golga7, Cd200r1, Bin3, Hic2, Fam184b, Arpp19, Fign, Kctd21, Trim71, Ralb, Zfp280b, Suv39h2, Tsc1, Cldn12, Tmem167, Arrdc4, Pcp4l1, Nova1, Tnik, Gdpc1, Dzip1, Abi3, Atg4b, Tmem41a, Spryd4, Slc16a9, 1200014J11Rik, Riok3, Bzw1, Bzw2, Prpf38b, Golt1b, Edem3, Nkap, Polr3d, Gatm, Lipt2, Cap2, Brd3, Ergic1, 1810074P20Rik, Tll4, Stx17, Fbxo32, Gpatch2, Plxnd1, Limd2, Ubxn4, Gipc1, Zcchc3, Ccny, Trabd, Aen, Cgnl1, Fam135a, Leprotl1, Al846148, 0610030E20Rik, Adipor2, Nsmce2, Ppm1f, Letmd1, Tab2, Zfp740, Ddi2, Vps26b, 2200002K05Rik, Snx5, Tmem110, Pcgf3, Fam83g, Pxdn, Ints2, Slc35d2, Naa30, Dusp16, Tspan2, Prss22, Pgm2l1, Stox2, Zfp689, Golga7b, Col24a1, Ing3, Slc16a14, Cpa4, Slc25a18, Fbxo30, Ppapdc1b, Nkiras2, Ppp2r2a, Fndc3b, Cyb561d1, Tsc22d2, Cnot2, Lsm11, 2410042D21Rik, Ppme1, 2810030E01Rik, B3gat3, Kctd17, Slc22a23, Tmed5, Tbkbp1, Wasl, Xpot, Fam118a, 1700052N19Rik, Vgll3, Ppp2r1b, 1110012D08Rik, Slc25a27, Nphp3, Armc8, Sec14l1, Crct1, Stk40, Dtx2, 1700017B05Rik, Gale, 4931428F04Rik, Lonrf3, Ppapdc2, Zswim5, Snx16, Usp38, Tmem65, Usp47, Rab11fip2, Dpp3, Etnk1, Arl5a, Gns, Slc10a6, Klhl24, Senp2, 6230409E13Rik, Stard3nl, Tgds, Clasp2, Slc10a7, Eif2c4, Atg16l1, Bcl7a, Rnf170, Lbh, Hook1, Klhd8b, Rictor, Dlst, Chsy3, Spnb4, Tusc2, Med8, Mesdc1, Zfp202, Arl4d, Ndst3, Ctms, Lin28a, Elovl4, Slc12a9, Tmem2, Kremen1, Sec16b, Entpd7, Gpr45, Brwd1, Cecr6, Trim33, Cnrm4, Qars, Lbr, Rdh10, Clp1, Cercam, Sall4, Kcnc4</p> |
|------------|------------------------------------------------------------------------------------------------------------------------------------------------------------------------------------------------------------------------------------------------------------------------------------------------------------------------------------------------------------------------------------------------------------------------------------------------------------------------------------------------------------------------------------------------------------------------------------------------------------------------------------------------------------------------------------------------------------------------------------------------------------------------------------------------------------------------------------------------------------------------------------------------------------------------------------------------------------------------------------------------------------------------------------------------------------------------------------------------------------------------------------------------------------------------------------------------------------------------------------------------------------------------------------------------------------------------------------------------------------------------------------------------------------------------------------------------------------------------------------------------------------------------------------------------------------------------------------------------------------------------------------------------------------------------------------------------------------------------------------------------------------------------------------------------------------------------------------------------------------------------------------------------------------------------------------------------------------------------------------------------------------------------------------------------------------------------------------------------------------------------------------------------------------------------------------------------------------------------------------------------------------------------------------------------------------------------------------------------------------------------------------------------------------------------------------------------------------------------------------------------------------------------------------------------------------------------------------------------------------------------------------------------------------------------------------------------------------------------------------------------------------------------------------------------------------------------------------------------------------------------------------------------------------------------------------------------------------------------------------------------------------------------------------------------------------------------------------------------------------------------------------------------------------------------------------------------------------------------------------------------------------------------------------------------------------------------------------------------------------------------------------------------------------------------------------------------------------------------------------------------------------------------------------------------------------------------------------------------------------------------------------------------------------------------------------------------------------------------------------------------------------------------------------------------------------------------------------------------------------------------------------------------------------------------------------------------------------------------------------------------------------------------------------------------------------------------------------------------------------------------------------------------------------------------------------------------------------------------------------------------------------------------------------------------------------------------------------------------------------------------------------------------------------------------------------------------------------------------------------------------------------------------------------------------------------------------------------------------------------------------------------------------------------------------------------------------------------------------------------------------------------------------------------------------------------------------------------------------------------------------------------------------------------------------------------------------------------------------------------------------------------------------------------------------------------------------------------------------------------------------------------------------------------------------------------------------------------------------------------------------------------------------------------------------------------------------------------------------------------------------------------------------------------------------------------------------------------------------------------------------------------------------------------------------------------------------------------------------------------------------------------------------------------------------|

|            |                                                                                                                                                                                                                                                                                                                                                                                                                                                                                                                                                                                                                                                                                                                                                                                                                                                                                                                                                                                                                                                                                                                                                                                                                                                                                                                                                                                                                                                                                                                                                                                                                                                                                                                                                                                                                                                                                                                                                                                                                                                                                                                                                                                                                                                                                                                                                                                                                                                                                                                                                                                                                                                                                                                                                                                                                                                                                                                                                                                                                                                                                                                                                                                                                                                                                                                                                                                                                                                                                                                                                                                                                                                                                                                                                                                                                                                                                                                                                                                                                                                                                                                                                                                                                                                                                                                                                                                                                                                                                                                                                                                                                                                                                                                                                                                                                                                                                                                                                                                                                                                                                                                                                                                                                                                                                                                                                                                                                                                                                                                                                                                                                                                                            |
|------------|----------------------------------------------------------------------------------------------------------------------------------------------------------------------------------------------------------------------------------------------------------------------------------------------------------------------------------------------------------------------------------------------------------------------------------------------------------------------------------------------------------------------------------------------------------------------------------------------------------------------------------------------------------------------------------------------------------------------------------------------------------------------------------------------------------------------------------------------------------------------------------------------------------------------------------------------------------------------------------------------------------------------------------------------------------------------------------------------------------------------------------------------------------------------------------------------------------------------------------------------------------------------------------------------------------------------------------------------------------------------------------------------------------------------------------------------------------------------------------------------------------------------------------------------------------------------------------------------------------------------------------------------------------------------------------------------------------------------------------------------------------------------------------------------------------------------------------------------------------------------------------------------------------------------------------------------------------------------------------------------------------------------------------------------------------------------------------------------------------------------------------------------------------------------------------------------------------------------------------------------------------------------------------------------------------------------------------------------------------------------------------------------------------------------------------------------------------------------------------------------------------------------------------------------------------------------------------------------------------------------------------------------------------------------------------------------------------------------------------------------------------------------------------------------------------------------------------------------------------------------------------------------------------------------------------------------------------------------------------------------------------------------------------------------------------------------------------------------------------------------------------------------------------------------------------------------------------------------------------------------------------------------------------------------------------------------------------------------------------------------------------------------------------------------------------------------------------------------------------------------------------------------------------------------------------------------------------------------------------------------------------------------------------------------------------------------------------------------------------------------------------------------------------------------------------------------------------------------------------------------------------------------------------------------------------------------------------------------------------------------------------------------------------------------------------------------------------------------------------------------------------------------------------------------------------------------------------------------------------------------------------------------------------------------------------------------------------------------------------------------------------------------------------------------------------------------------------------------------------------------------------------------------------------------------------------------------------------------------------------------------------------------------------------------------------------------------------------------------------------------------------------------------------------------------------------------------------------------------------------------------------------------------------------------------------------------------------------------------------------------------------------------------------------------------------------------------------------------------------------------------------------------------------------------------------------------------------------------------------------------------------------------------------------------------------------------------------------------------------------------------------------------------------------------------------------------------------------------------------------------------------------------------------------------------------------------------------------------------------------------------------------------------------------------------|
| mmu-miR-7f | <p>Nhsl2, Nfxl1, Zfp282, Rpsud3, B630005N14Rik, A130022J15Rik, Fbxl14, Spred3, Agpat6, Dcun1d2, Cd276, Cdh22, Sbk1, Aldh6a1, Tecpr2, Rab15, lars, Rnf44, Dusp22, AW549877, Dhx57, 2010002N04Rik, Gpr137, Unc5a, Lgr4, Chd4, Olr1, Prkaa2, Prkab2, Galnt2, B3gnt1, Uhrf2, Chd9, Rnf20, Txlna, Braf, Hdlbp, Lmx1a, Slc8a2, Hmga1-rs1, EglN2, Abcg1, Foxp2, Acta1, Acvr1b, Acvr2a, Adrb2, Adrb3, Ankfy1, Ap1s1, Speg, Aqp4, Bach1, Bcap29, Bcat1, Bcl2l1, Prdm1, Bsn, Cacna1d, Calm1, Cap1, Cask, Casp3, Cbx2, Cbx5, Ccnd1, Ccnd2, Cd86, Cdc25a, Chrd, Socs1, Tpp1, Cmah, Ccr7, Coil, Col14a1, Col15a1, Col3a1, Col4a1, Col4a2, Col4a5, Col5a2, Col1a2, Cpd, Crk, Cry2, Cyp46a1, Ddn, Dmd, Dmp1, Dnajc1, Arid3a, Dyrk1a, E2f5, Eda, Edn1, Ddx19a, Eif4g2, Epha3, Epha4, Esr2, Smarcd1, Igf2bp3, Ezh2, Fasl, Fgf4, Fgf5, Frk, Gabpa, Gabra6, Galnt1, Gas7, Mtpn, Nr6a1, Gdap2, Ghr, Gnal, Gng5, Grik2, Grin2b, Gtf2i, Hand1, Has2, Hic1, Hk2, Hmga1, Hmga2, Hoxd1, Htr4, Igf1r, Il10, Il13, Il6, Lrig1, Insr, Kcnc3, Khgrp, Kif21b, Klkb1, Kpna1, Lalba, Limk2, Sh2b3, Lor, Peg10, Slc24a6, Ppargc1b, Grid2ip, Mxd1, Masp1, Mdfi, Mllt10, Ndst2, Meis2, Meis3, Grpel2, Myo1f, Nefm, Ngf, Nid2, Nlk, Mycn, Nras, Nrtm, Ntn1, Osmr, P2rx1, P4ha2, Pldn, Pak1, Pappa, Pbx1, Pbx2, Pbx3, Pcx, Pdgfb, Piga, Pld3, Prrx1, Ppargc1a, Mobkl3, Mapk11, Prlr, Socs7, Edem1, Dusp1, Pla2g15, Ptprd, Ptpru, Igdcc3, Rasgrp1, Tet3, Rb1, Rbpj, Rcn1, Rdx, Dpf2, Rgs16, Rnf7, Rorc, Sub1, Rrm2, Scd2, Scn5a, Scn8a, Msr1, Sema4c, Sema4f, Ostf1, St6gal1, St8sia1, Clpb, Skil, Slc31a1, Smarcc1, Snap23, Snn, Sox13, Sall3, Strbp, Dtx4, Wdr37, Gramd1c, Sreb2, Dot1l, Slk, Prrg3, Dock3, Cpeb3, Zc3hav1l, Stx3, Snx30, Zfp710, Igsf1, Lcorl, Tmc7, Syt1, Syt2, Tmem194, Trim41, Fam123c, Trib1, Plekhh1, Pde12, Zfyve26, Dcaf15, Lcor, Pqlc2, Mfsd4, Plekhg6, Tarbp2, Tbx5, Zfp354a, Nipal4, Tet2, Tcf7l1, Etnk2, Hip1, C330019G07Rik, Lrrc20, Cdc34, Eea1, 9-Mar, Pik3ip1, Fnip1, Tead3, Tead4, Wnt9a, Taok1, Hlf, Trib2, Pacs2, Tgfb1, Tgfb3, Thbs1, Thrsp, Tia1, Gcnt4, Marveld2, Timm17b, Slc4a7, Sec24c, D14Abb1e, Pcdh20, Tnfaip3, Tnfrsf1b, Usp12, Ucg, Utrn, Farp1, Zc3h3, 5031439G07Rik, Gxylt1, Wnt1, Fam43a, Wnt9b, Impg2, Xk, Rab40c, Uhrf1bp1, Btdb9, Abcc10, Dlgap1, Map4k3, Thoc1, Ammccr1, Apbb3, Cep120, Rnf165, Lrfn4, Trpm6, Fam178a, Yod1, Ahctf1, Zfp2, Vash2, B3gnt7, Ikzf2, Slc30a1, Slc35c1, Frmd5, Btdb3, Dlgap4, Ppp1r16b, Npepl1, Zbtb10, Ythdf3, Syt11, Pogz, Slc25a24, B230312A22Rik, Zbtb5, Ikbkap, Acer2, Slc5a9, Zfp362, Fras1, Frmd4b, Slc6a1, Dcun1d3, Psd3, Ddx19b, Tmem231, Adamts15, Zbtb16, Lingo1, Rab8b, Prtg, Ddx26b, Pcyt1b, Nxt2, Adamts14, Trhde, Ankrd52, Pla2g3, Ankrd43, Usp32, Adamts5, Akap6, Fam160b2, Adamts12, Rspo2, Mgl1, Nek3, Smcr7l, Klhl6, Liph, Lmln, Gpr156, Arid1b, Scn11a, Ccnj, Slco5a1, Tor1aip2, Scyl3, Crb2, Tspan18, Slc7a14, Frem2, Zfp697, Gdf6, Zfp462, Klhl9, Gpatch3, E2f2, Napepld, Tmprss11f, Sbn1, Stard13, Styk1, Arhgap20, Tnfaip8l3, C230081A13Rik, Klhl31, Klf8, Trappc1, Onecut3, Srgap3, Gga3, Esrrb, Spata2, Map3k1, Mapk8, Sema4g, Homer2, Rab11fip4, Greb1, Slc38a9, 9930012K11Rik, B3galt1, Arhgap28, Dagla, Mgat4a, Cep110, Map4k4, Acvr1c, Znf512b, Trpc7, Lrig2, Vsnl1, Gpr157, Nat8l, AU019823, Rab6b, Mbtps2, Zfp275, Rpsud2, X99384, Dnajb9, Abcc5, Rasl10b, Nynrin, Klhl23, Efh2, Ubf1, D11Wsu99e, Limd1, Ulk2, Adamts8, Fbxl12, Fndc3a, Pld5, Dusp4, Hif1an, Igf2bp2, Apba1, Ercc6, Ugg2, Nceh1, Zbtb39, Zmat4, Lrrc58, Senp5, Iqcb1, Lrig3, Trank1, Ubn2, Phf8, Zbtb26, Pptc7, Slc26a9, Rfx6, Cdv3, Frs2, Pitpnm3, Gfod1, Zfp516, 8430427H17Rik, Fnip2, Al464131, Usp24, Acot11, Slc5a6, Sdk1, D630045J12Rik, Trim67, Thoc2, Kcnk18, Slc2a12, Col27a1, Serf2, Lin28b, Obscn, Begain, Mll2, Greb1l, 5930434B04Rik, Xkr8, Cep135, Pdp2, Scn4b, Fam84b, Taf9b, Gnptab, Nlrc5, Arhgef15, E2f6, Ero1l, Tmprss2, Dlc1, Mapk6, Dkk3, Tmod2, Rragd, Reep1, Atxn1l, Zfp644, Ruffy3, Tmx4, D1Bwg0212e, Hif3a, Nap1l1, Cpsf4, Nme6, Slc4a4, Plagl2, Plxnc1, Arid3c, Rbm38, Tspan5, Styx, Mycbp, Abcb9, Arid3b, 1500003O03Rik, Syncrip, Ikbke, Elf4, Ankr49, Rbms2, Nme4, Habp4, Crtap, Igdcc4, Vav3, Tob2, Psors1c2, Golga7, Cd200r1, Bin3, Hic2, Fam184b, Arpp19, Fign, Kctd21, Trim71, Ralb, Zfp280b, Suv39h2, Tsc1, Cldn12, Tmem167, Arrdc4, Pcp4l1, Nova1, Tnik, Gdpc1, Dzip1, Abi3, Atg4b, Tmem41a, Spryd4, Slc16a9, 1200014J11Rik, Riok3, Bzw1, Bzw2, Prpf38b, Golt1b, Edem3, Nkap, Polr3d, Gatm, Lipt2, Cap2, Brd3, Ergic1, 1810074P20Rik, Tll4, Stx17, Fbxo32, Gpatch2, Plxnd1, Limd2, Ubxn4, Gipc1, Zcchc3, Ccny, Trabd, Aen, Cgnl1, Fam135a, Leprotl1, Al846148, 0610030E20Rik, Adipor2, Nsmce2, Ppm1f, Letmd1, Tab2, Zfp740, Ddi2, Vps26b, 2200002K05Rik, Snx5, Tmem110, Pcgf3, Fam83g, Pxdn, Ints2, Slc35d2, Naa30, Dusp16, Tspan2, Prss22, Pgm2l1, Stox2, Zfp689, Golga7b, Col24a1, Ing3, Slc16a14, Cpa4, Slc25a18, Fbxo30, Ppapdc1b, Nkiras2, Ppp2r2a, Fndc3b, Cyb561d1, Tsc22d2, Cnot2, Lsm11, 2410042D21Rik, Ppme1, 2810030E01Rik, B3gat3, Kctd17, Slc22a23, Tmed5, Tbkbp1, Wasl, Xpot, Fam118a, 1700052N19Rik, Vgl3, Ppp2r1b, 1110012D08Rik, Slc25a27, Nphp3, Armc8, Sec14l1, Crct1, Stk40, Dtx2, 1700017B05Rik, Gale, 4931428F04Rik, Lonrf3, Ppapdc2, Zswim5, Snx16, Usp38, Tmem65, Usp47, Rab11fip2, Dpp3, Etnk1, Arl5a, Gns, Slc10a6, Klhl24, Senp2, 6230409E13Rik, Stard3nl, Tgds, Clasp2, Slc10a7, Eif2c4, Atg16l1, Bcl7a, Rnf170, Lbh, Hook1, Klhdc8b, Rictor, Dlst, Chsy3, Spnb4, Tusc2, Med8, Mesdc1, Zfp202, Arl4d, Ndst3, Ctms, Lin28a, Elovl4, Slc12a9, Tmem2, Kremen1, Sec16b, Entpd7, Gpr45, Brwd1, Cecr6, Trim33, Cnrm4, Qars, Lbr, Rdh10, Clp1, Cercam, Sall4, Kcnc4</p> |
|------------|----------------------------------------------------------------------------------------------------------------------------------------------------------------------------------------------------------------------------------------------------------------------------------------------------------------------------------------------------------------------------------------------------------------------------------------------------------------------------------------------------------------------------------------------------------------------------------------------------------------------------------------------------------------------------------------------------------------------------------------------------------------------------------------------------------------------------------------------------------------------------------------------------------------------------------------------------------------------------------------------------------------------------------------------------------------------------------------------------------------------------------------------------------------------------------------------------------------------------------------------------------------------------------------------------------------------------------------------------------------------------------------------------------------------------------------------------------------------------------------------------------------------------------------------------------------------------------------------------------------------------------------------------------------------------------------------------------------------------------------------------------------------------------------------------------------------------------------------------------------------------------------------------------------------------------------------------------------------------------------------------------------------------------------------------------------------------------------------------------------------------------------------------------------------------------------------------------------------------------------------------------------------------------------------------------------------------------------------------------------------------------------------------------------------------------------------------------------------------------------------------------------------------------------------------------------------------------------------------------------------------------------------------------------------------------------------------------------------------------------------------------------------------------------------------------------------------------------------------------------------------------------------------------------------------------------------------------------------------------------------------------------------------------------------------------------------------------------------------------------------------------------------------------------------------------------------------------------------------------------------------------------------------------------------------------------------------------------------------------------------------------------------------------------------------------------------------------------------------------------------------------------------------------------------------------------------------------------------------------------------------------------------------------------------------------------------------------------------------------------------------------------------------------------------------------------------------------------------------------------------------------------------------------------------------------------------------------------------------------------------------------------------------------------------------------------------------------------------------------------------------------------------------------------------------------------------------------------------------------------------------------------------------------------------------------------------------------------------------------------------------------------------------------------------------------------------------------------------------------------------------------------------------------------------------------------------------------------------------------------------------------------------------------------------------------------------------------------------------------------------------------------------------------------------------------------------------------------------------------------------------------------------------------------------------------------------------------------------------------------------------------------------------------------------------------------------------------------------------------------------------------------------------------------------------------------------------------------------------------------------------------------------------------------------------------------------------------------------------------------------------------------------------------------------------------------------------------------------------------------------------------------------------------------------------------------------------------------------------------------------------------------------------------------------------|

mmu-miR-98

Nhs12, Nfxl1, Zfp282, Rpusd3, B630005N14Rik, A130022J15Rik, Fbxl14, Spred3, Agpat6, Dcun1d2, Cd276, Cdh22, Sbk1, Aldh6a1, Tecpr2, Rab15, Iars, Rnf44, Dusp22, AW549877, Dhx57, 2010002N04Rik, Gpr137, Unc5a, Lgr4, Chd4, Olr1, Prkaa2, Prkab2, Galnt2, B3gnt1, Uhrf2, Chd9, Rnf20, Txlna, Braf, Hd1bp, Lmx1a, Slc8a2, Hmga1-rs1, Eglnt2, Abcg1, Foxp2, Acta1, Acvr1b, Acvr2a, Adrb2, Adrb3, Ankfy1, Ap1s1, Speg, Aqp4, Bach1, Bcap29, Bcat1, Bcl2l1, Prdm1, Bsn, Cacna1d, Calm1, Cap1, Cask, Casp3, Cbx2, Cbx5, Ccnd1, Ccnd2, Cd86, Cdc25a, Chrd, Socs1, Tpp1, Cmah, Ccr7, Coil, Col14a1, Col15a1, Col3a1, Col4a1, Col4a2, Col4a5, Col5a2, Col1a2, Cpd, Crk, Cry2, Cyp46a1, Ddn, Dmd, Dmp1, Dnajc1, Arid3a, Dyrk1a, E2f5, Eda, Edn1, Ddx19a, Eif4g2, Epha3, Epha4, Esr2, Smarcd1, Igf2bp3, Ezh2, Fasl, Fgf4, Fgf5, Frk, Gabpa, Gabra6, Galnt1, Gas7, Mtpn, Nr6a1, Gdap2, Ghr, Gnal, Gng5, Grik2, Grin2b, Gtf2i, Hand1, Has2, Hic1, Hk2, Hmga1, Hmga2, Hoxd1, Htr4, Igf1r, Ii10, Ii13, Ii6, Lrig1, Insr, Kcnc3, Khsrp, Kif21b, Klkb1, Kpna1, Lalba, Limk2, Sh2b3, Lor, Peg10, Slc24a6, Ppargc1b, Grid2ip, Mxd1, Masp1, Mdfi, Mllt10, Ndst2, Meis2, Meis3, Gpel2, Myo1f, Nefm, Ngf, Nid2, Nlk, Mycn, Nras, Nrtn, Ntn1, Osmr, P2rx1, P4ha2, Pldn, Pak1, Pappa, Pbx1, Pbx2, Pbx3, Pcx, Pdgfb, Piga, Pld3, Prrx1, Ppara, Ppargc1a, Mobkl3, Mapk11, Prlr, Socs7, Edem1, Dusp1, Pla2g15, Ptprd, Ptpu, Igdcc3, Rasgrp1, Tet3, Rb1, Rbpj, Rcn1, Rdx, Dpf2, Rgs16, Rnf7, Rorc, Sub1, Rrm2, Scd2, Scn5a, Scn8a, Msr1, Sema4c, Sema4f, Ostf1, St6gal1, St8sia1, Clpb, Skil, Slc31a1, Smarcc1, Snap23, Snn, Sox13, Sall3, Strbp, Dtx4, Wdr37, Gramd1c, Srebf2, Dot1l, Slk, Prrg3, Dock3, Cpeb3, Zc3hav1l, Stx3, Snx30, Zfp710, Igsf1, Lcorl, Tmc7, Syt1, Syt2, Tmem194, Trim41, Fam123c, Trib1, Plekhh1, Pde12, Zfyve26, Dcaf15, Lcor, Pqlc2, Mfsd4, Plekhg6, Tarbp2, Tbx5, Zfp354a, Nipal4, Tet2, Tcf7l1, Etnk2, Hip1, C330019G07Rik, Lrrc20, Cdc34, Eea1, 9-Mar, Pik3ip1, Fnip1, Tead3, Tead4, Wnt9a, Taok1, Hlf, Trib2, Pacs2, Tgfb1, Tgfb3, Thbs1, Thrsp, Tia1, Gcmt4, Marveld2, Timm17b, Slc4a7, Sec24c, D14Abb1e, Pcdh20, Tnfai3, Tnfrs1b, Usp12, Ugcg, Utrn, Farp1, Zc3h3, 5031439G07Rik, Gxylt1, Wnt1, Fam43a, Wnt9b, Impg2, Xk, Rab40c, Uhrf1bp1, Btdb9, Abcc10, Dlgap1, Map4k3, Thoc1, Ammccr1l, Apbb3, Cep120, Rnf165, Lfn4, Trpm6, Fam178a, Yod1, Ahctf1, Zfp2, Vash2, B3gnt7, Ikzf2, Slc30a1, Slc35c1, Frmd5, Btdb3, Dlgap4, Ppp1r16b, Npepl1, Zbtb10, Ythdf3, Syt11, Pogz, Slc25a24, B230312A22Rik, Zbtb5, Ikbkap, Acer2, Slc5a9, Zfp362, Fras1, Frmd4b, Slc6a1, Dcun1d3, Psd3, Ddx19b, Tmem231, Adamts15, Zbtb16, Lingo1, Rab8b, Prtg, Ddx26b, Pcyt1b, Nxt2, Adamts14, Trhde, Ankrd52, Pla2g3, Ankrd43, Usp32, Adamts5, Akap6, Fam160b2, Adamts12, Rspo2, Mgl1, Nek3, Smcr7l, Kihl6, Liph, Lmln, Gpr156, Arid1b, Scn11a, Ccnj, Slco5a1, Tor1aip2, Scyl3, Crb2, Tspan18, Slc7a14, Frem2, Zfp697, Gdf6, Zfp462, Kihl9, Gpatch3, E2f2, Napepld, Tmprss11f, Sbn1, Stard13, Styk1, Arhgap20, Tnfai3, C230081A13Rik, Kihl31, Klfb, Trappc1, Onecut3, Srgap3, Gga3, Esrrb, Spata2, Map3k1, Mapk8, Sema4g, Homer2, Rab11fip4, Greb1, Slc38a9, 9930012K11Rik, B3galt1, Arhgap28, Dagla, Mgat4a, Cep110, Map4k4, Acvr1c, Znf512b, Trpc7, Lrig2, Vsnl1, Gpr157, Nat8l, AU019823, Rab6b, Mbtps2, Zfp275, Rpusd2, X99384, Dnajb9, Abcc5, Rasl10b, Nynrin, Kihl23, Efh2, Ubfd1, D11Wsu99e, Limd1, Ulk2, Adamts8, Fbxl12, Fncc3a, Pld5, Dusp4, Hif1an, Igf2bp2, Apba1, Ercc6, Ugg1, Nceh1, Zbtb39, Zmat4, Lrrc58, Senp5, Iqcb1, Lrig3, Trank1, Ubn2, Phf8, Zbtb26, Ptpc7, Slc26a9, Rfx6, Cdv3, Frs2, Pitpm3, Gfod1, Zfp516, 8430427H17Rik, Fnip2, AI464131, Usp24, Acot11, Slc5a6, Sdk1, D630045J12Rik, Trim67, Thoc2, Kcnk18, Slc2a12, Col27a1, Serf2, Lin28b, Obscn, Begain, Mli2, Greb1, 5930434B04Rik, Xkr8, Cep135, Pdp2, Scn4b, Fam84b, Taf9b, Gnptab, Nlrc5, Arhgef15, E2f6, Ero1l, Tmprss2, Dlc1, Mapk6, Dkk3, Tmod2, Rragd, Reep1, Atxn1, Zfp644, Ruffy3, Tmx4, D1Bwg0212e, Hif3a, Nap1l1, Cpsf4, Nme6, Slc4a4, Plagl2, Plxnc1, Arid3c, Rbm38, Tspan5, Styx, Mycbp, Abcb9, Arid3b, 1500003O03Rik, Syncrip, Ikbke, Ankrd49, Rbms2, Nme4, Habp4, Crtap, Igdcc4, Vav3, Tob2, Psors1c2, Golga7, Cd200r1, Bin3, Hic2, Fam184b, Arpp19, Fign, Kctd21, Trim71, Ralb, Zfp280b, Suv39h2, Tsc1, Cldn12, Tmem167, Arrdc4, Pcp4l1, Nova1, Tnik, Gdpd1, Dzip1, Abi3, Atg4b, Tmem41a, Dcbld1, Spryd4, Slc16a9, 1200014J11Rik, Riok3, Bzw1, Bzw2, Prpf38b, Golt1b, Edem3, Nkap, Polr3d, Gatm, Lipt2, Cap2, Brd3, Ergic1, 1810074P20Rik, Tll4, Stx17, Fbxo32, Gpatch2, Plxnd1, Limd2, Ubxn4, Gipc1, Zcchc3, Ccny, Trabd, Aen, Cgnl1, Fam135a, Leprotl1, AI846148, 0610030E20Rik, Adipor2, Nsmce2, Ppm1f, Letmd1, Tab2, Zfp740, Ddi2, Vps26b, 2200002K05Rik, Snx5, Tmem110, Pcgf3, Fam83g, Pxdn, Ints2, Slc35d2, Naa30, Dusp16, Tspan2, Prss22, Pgm2l1, Stox2, Zfp689, Golga7b, Col24a1, Ing3, Slc16a14, Cpa4, Slc25a18, Fbxo30, Ppapdc1b, Nkiras2, Ppp2r2a, Fncc3b, Cyb561d1, Tsc22d2, Cnot2, Lsm11, 2410042D21Rik, Ppme1, 2810030E01Rik, B3gat3, Kctd17, Slc22a23, Tmed5, Tkbpp1, Wasl, Xpot, Fam118a, 1700052N19Rik, Vgll3, Ppp2r1b, 1110012D08Rik, Slc25a27, Nphp3, Armc8, Sec14l1, Crct1, Stk40, Dtx2, 1700017B05Rik, Gale, 4931428F04Rik, Lonrf3, Ppapdc2, Zswim5, Snx16, Usp38, Tmem65, Usp47, Rab11fip2, Dpp3, Etnk1, Arl5a, Gns, Slc10a6, Kihl24, Senp2, 6230409E13Rik, Stard3nl, Tgds, Clasp2, Slc10a7, Eif2c4, Atg16l1, Bcl7a, Rnf170, Lbh, Hook1, Kihdc8b, Rictor, Dlst, Chsy3, Spnb4, Tusc2, Med8, Mesdc1, Zfp202, Arl4d, Ndst3, Ctns, Lin28a, Elovl4, Slc12a9, Tmem2, Kremen1, Sec16b, Entpd7, Gpr45, Brwd1, Ceacr6, Trim33, Cnnm4, Qars, Lbr, Rdh10, Clp1, Cercam, Sall4, Kcnc4

**Supplementary Table 3.** Gene-ontology (GO) terms enriched by miRNAs differentially expressed in LTP.

| <b>Up-regulated miRNAs:</b>       |                                                    |                                                                                                   |                                                                        |
|-----------------------------------|----------------------------------------------------|---------------------------------------------------------------------------------------------------|------------------------------------------------------------------------|
| <b>GO ID (cellular Component)</b> | <b>Go Term (Cellular Component GO Term)</b>        | <b>Gene Symbol (genes enriched by up-regulated miRNAs)</b>                                        | <b>Up-regulated miRNAs</b>                                             |
| GO:0000267                        | cell fraction                                      | Casp3, Dock3, Dusp1, Dusp4, Ercc6, Fgf4, Limk2, Mapk11, Pcx, Pla2g15, Rrm2, Smarcc1, Tab2, Tpp1   | mmu-let-7a, mmu-let-7b, mmu-let-7c, mmu-let-7e, mmu-let-7f, mmu-miR-98 |
| GO:0000307                        | cyclin-dependent protein kinase holoenzyme complex | Ccnd1, Ccnd2, Ccny                                                                                | mmu-let-7a, mmu-let-7b, mmu-let-7c, mmu-let-7e, mmu-let-7f, mmu-miR-98 |
| GO:0000445                        | THO complex part of transcription export complex   | Thoc1, Thoc2                                                                                      | mmu-let-7a, mmu-let-7b, mmu-let-7c, mmu-let-7e, mmu-let-7f, mmu-miR-98 |
| GO:0001518                        | voltage-gated sodium channel complex               | Scn11a, Scn4b, Scn5a, Scn8a                                                                       | mmu-let-7a, mmu-let-7b, mmu-let-7c, mmu-let-7e, mmu-let-7f, mmu-miR-98 |
| GO:0001950                        | plasma membrane enriched fraction                  | Snap23, Stx3                                                                                      | mmu-let-7a, mmu-let-7b, mmu-let-7c, mmu-let-7e, mmu-let-7f, mmu-miR-98 |
| GO:0005578                        | proteinaceous extracellular matrix                 | Adamts12, Adamts15, Adamts5, Adamts8, Crtap, Dmp1, Impg2, Pxdn, Tgfbr3, Wnt1, Wnt9a, Wnt9b, Mmp11 | mmu-let-7a, mmu-let-7b, mmu-let-7c, mmu-let-7e, mmu-let-7f, mmu-miR-98 |
| GO:0005581                        | collagen                                           | Col14a1, Col15a1, Col24a1, Col4a1, Col4a2, Col4a5, Eda, Msr1, P4ha2                               | mmu-let-7a, mmu-let-7b, mmu-let-7c, mmu-let-7e, mmu-let-7f, mmu-miR-98 |
| GO:0005583                        | fibrillar collagen                                 | Col1a2, Col27a1, Col5a2                                                                           | mmu-let-7a, mmu-let-7b, mmu-let-7c, mmu-let-7e, mmu-let-7f, mmu-miR-98 |

|            |                              |                                                                                                                                                                |                                                                        |
|------------|------------------------------|----------------------------------------------------------------------------------------------------------------------------------------------------------------|------------------------------------------------------------------------|
| GO:0005586 | collagen type III            | Col3a1                                                                                                                                                         | mmu-let-7a, mmu-let-7b, mmu-let-7c, mmu-let-7e, mmu-let-7f, mmu-miR-98 |
| GO:0005587 | collagen type IV             | Col4a1, Col4a2, Col4a5                                                                                                                                         | mmu-let-7a, mmu-let-7b, mmu-let-7c, mmu-let-7e, mmu-let-7f, mmu-miR-98 |
| GO:0005604 | basement membrane            | Cask, Col15a1, Frs1, Frem2, Nid2, Ntn1                                                                                                                         | mmu-let-7a, mmu-let-7b, mmu-let-7c, mmu-let-7e, mmu-let-7f, mmu-miR-98 |
| GO:0005622 | intracellular                | Apba1, Arhgap20, Arhgef15, Arl5a, Cacna1d, Ccr7, Col1a2, Gpatch2, Gpatch3, Igf1r, Il10, Lingo1, Map4k3, Nras, Plxnc1, Prlr, Ralb, Rasl10b, Sh2b3, Srgap3, Yod1 | mmu-let-7a, mmu-let-7b, mmu-let-7c, mmu-let-7e, mmu-let-7f, mmu-miR-98 |
| GO:0005643 | nuclear pore                 | Ahctf1, Ddx19a, Lbr, Senp2                                                                                                                                     | mmu-let-7a, mmu-let-7b, mmu-let-7c, mmu-let-7e, mmu-let-7f, mmu-miR-98 |
| GO:0005652 | nuclear lamina               | Cask, Lbr                                                                                                                                                      | mmu-let-7a, mmu-let-7b, mmu-let-7c, mmu-let-7e, mmu-let-7f, mmu-miR-98 |
| GO:0005667 | transcription factor complex | E2f2, E2f5, Foxp2, Nr6a1, Onecut3, Pbx1, Pbx2, Pbx3, Rb1, Rbpj, Sall4, Sub1, Taf9b, Tbx5, Tcf7l1, Tead3, Tead4                                                 | mmu-let-7a, mmu-let-7b, mmu-let-7c, mmu-let-7e, mmu-let-7f, mmu-miR-98 |
| GO:0005730 | nucleolus                    | 2410042D21Rik, Aen, Brwd1, Cask, Cbx5, Ccnd2, Cdv3, Coil, Dmp1, Dnajb9, Dyrk1a, Ercc6, Hand1, Ikbkap, Lbh, Lin28a, Phf8, Rbpj, Rdx, Rnf20, Sub1, Wasl, Zfp354a | mmu-let-7a, mmu-let-7b, mmu-let-7c, mmu-let-7e, mmu-let-7f, mmu-miR-98 |
| GO:0005801 | cis-Golgi network            | B3gat3, Limk2, Tmed5, Trappc1                                                                                                                                  | mmu-let-7a, mmu-let-7b, mmu-let-7c, mmu-let-7e, mmu-let-7f, mmu-miR-98 |
| GO:0005901 | caveola                      | Adrb2, Dlc1, Fasl, Igf1r, Insr                                                                                                                                 | mmu-let-7a, mmu-let-7b, mmu-let-7c, mmu-let-7e, mmu-let-7f, mmu-miR-98 |

|            |                                            |                                                                                                                                                                                                                                                       |                                                                        |
|------------|--------------------------------------------|-------------------------------------------------------------------------------------------------------------------------------------------------------------------------------------------------------------------------------------------------------|------------------------------------------------------------------------|
| GO:0005969 | serine-pyruvate aminotransferase complex   | Eea1                                                                                                                                                                                                                                                  | mmu-let-7a, mmu-let-7b, mmu-let-7c, mmu-let-7e, mmu-let-7f, mmu-miR-98 |
| GO:0012505 | endomembrane system                        | Abcb9, Acer2, Agpat6, Ahctf1, Al464131, Akap6, Ap1s1, B3galt1, Ccnd2, Chsy3, Ddx19a, E2f5, Eda, Edem1, Elovl4, Ero1l, Fndc3a, Gipc1, Golga7, Lbr, Nat8l, Pak1, Piga, Rrm2, Sema4c, Senp2, Slc5a6, Srebf2, St6gal1, St8sia1, Stx17, Syt1, Vps26b, Wasl | mmu-let-7a, mmu-let-7b, mmu-let-7c, mmu-let-7e, mmu-let-7f, mmu-miR-98 |
| GO:0016442 | RNA-induced silencing complex              | Limd1, Tarbp2                                                                                                                                                                                                                                         | mmu-let-7a, mmu-let-7b, mmu-let-7c, mmu-let-7e, mmu-let-7f, mmu-miR-98 |
| GO:0016605 | PML body                                   | Ikbbke, Rb1, Senp2, Skil, Spnb4, Zbtb16, Elf4                                                                                                                                                                                                         | mmu-let-7a, mmu-let-7b, mmu-let-7c, mmu-let-7e, mmu-let-7f, mmu-miR-98 |
| GO:0019717 | synaptosome                                | Braf, Bsn, Cask, Dlgap4, Grid2ip, Grin2b, P2rx1, Sema4f, Slc6a1, Snap23                                                                                                                                                                               | mmu-let-7a, mmu-let-7b, mmu-let-7c, mmu-let-7e, mmu-let-7f, mmu-miR-98 |
| GO:0019898 | extrinsic to membrane                      | Eea1, Frmd5, Ghr, Gnal, Olr1, Rdx, Snx16, Snx5                                                                                                                                                                                                        | mmu-let-7a, mmu-let-7b, mmu-let-7c, mmu-let-7e, mmu-let-7f, mmu-miR-98 |
| GO:0030054 | cell junction                              | Aqp4, Bsn, C230081A13Rik, Cask, Cgnl1, Cldn12, Dlc1, Dlgap1, Dmd, Epha4, Gabra6, Gpr156, Grid2ip, Grik2, Grin2b, Hic2, Homer2, Lmln, Marveld2, Pak1, Psd3, Ptpru, Scn5a, Sema4c, Snap23, Stx3, Syt1, Syt11, Syt2, Tgfbr1                              | mmu-let-7a, mmu-let-7b, mmu-let-7c, mmu-let-7e, mmu-let-7f, mmu-miR-98 |
| GO:0030176 | integral to endoplasmic reticulum membrane | Abcb9, Agpat6, Edem1, Elovl4, Ero1l, Srebf2                                                                                                                                                                                                           | mmu-let-7a, mmu-let-7b, mmu-let-7c, mmu-let-7e, mmu-let-7f, mmu-miR-98 |
| GO:0030313 | cell envelope                              | Grin2b, P2rx1                                                                                                                                                                                                                                         | mmu-let-7a, mmu-let-7b, mmu-let-7c, mmu-let-7e, mmu-let-7f, mmu-miR-98 |

|            |                                      |                                                                                                                                                                                                                  |                                                                        |
|------------|--------------------------------------|------------------------------------------------------------------------------------------------------------------------------------------------------------------------------------------------------------------|------------------------------------------------------------------------|
| GO:0030424 | axon                                 | Adrb2, Epha4, Grik2, Grin2b, Kcnc3, Kcnc4, Mapk8, Mtpn, Nefm, Nrtn, Pak1, Scn11a, Scn8a, Slc6a1, Spnb4, Tnfrsf1b                                                                                                 | mmu-let-7a, mmu-let-7b, mmu-let-7c, mmu-let-7e, mmu-let-7f, mmu-miR-98 |
| GO:0030425 | dendrite                             | Adrb2, Arhgef15, Cask, Ddn, Dlgap4, Epha4, Gabra6, Gipc1, Grid2ip, Grik2, Grin2b, Homer2, Khsrp, Mapk8, Pak1, Scn8a, Sema4c, Slc8a2, Srebf2                                                                      | mmu-let-7a, mmu-let-7b, mmu-let-7c, mmu-let-7e, mmu-let-7f, mmu-miR-98 |
| GO:0030864 | cortical actin cytoskeleton          | Cap1, Myo1f, Spnb4, Utrn, Wasl                                                                                                                                                                                   | mmu-let-7a, mmu-let-7b, mmu-let-7c, mmu-let-7e, mmu-let-7f, mmu-miR-98 |
| GO:0031226 | intrinsic to plasma membrane         | Acvr1b, Acvr1c, Adrb2, Aqp4, Cacna1d, Eda, Epha3, Epha4, Gabra6, Ghr, Grik2, Grin2b, Igdcc4, Il6, Insr, Kcnc3, Kcnc4, Kctd21, Osmr, Plxnd1, Scn11a, Scn4b, Scn5a, Scn8a, Slc4a4, Slc6a1, Syt11, Tgfb3, Tmprss11f | mmu-let-7a, mmu-let-7b, mmu-let-7c, mmu-let-7e, mmu-let-7f, mmu-miR-98 |
| GO:0031240 | external side of cell outer membrane | P2rx1                                                                                                                                                                                                            | mmu-let-7a, mmu-let-7b, mmu-let-7c, mmu-let-7e, mmu-let-7f, mmu-miR-98 |
| GO:0031300 | intrinsic to organelle membrane      | Abcb9, Acer2, Agpat6, Edem1, Elovl4, Ero1l, Srebf2, St6gal1, St8sia1, Timm17b                                                                                                                                    | mmu-let-7a, mmu-let-7b, mmu-let-7c, mmu-let-7e, mmu-let-7f, mmu-miR-98 |
| GO:0031313 | extrinsic to endosome membrane       | Snx16, Snx5                                                                                                                                                                                                      | mmu-let-7a, mmu-let-7b, mmu-let-7c, mmu-let-7e, mmu-let-7f, mmu-miR-98 |
| GO:0031588 | AMP-activated protein kinase complex | Prkaa2, Prkab2                                                                                                                                                                                                   | mmu-let-7a, mmu-let-7b, mmu-let-7c, mmu-let-7e, mmu-let-7f, mmu-miR-98 |
| GO:0031594 | neuromuscular junction               | Col4a5, Epha4, Kcnc3, Kcnc4, Nefm, Utrn                                                                                                                                                                          | mmu-let-7a, mmu-let-7b, mmu-let-7c, mmu-let-7e, mmu-let-7f, mmu-miR-98 |
| GO:0032809 | neuronal cell body membrane          | Adrb2, Gabra6, Kcnc3                                                                                                                                                                                             | mmu-let-7a, mmu-let-7b, mmu-let-7c, mmu-let-7e, mmu-let-7f, mmu-miR-98 |



|            |                                             |                                                                                              |                                                                        |
|------------|---------------------------------------------|----------------------------------------------------------------------------------------------|------------------------------------------------------------------------|
| GO:0034673 | inhibin-betaglycan-ActRII complex           | Acvr2a, Tgfbr3                                                                               | mmu-let-7a, mmu-let-7b, mmu-let-7c, mmu-let-7e, mmu-let-7f, mmu-miR-98 |
| GO:0034703 | cation channel complex                      | Akap6, Cacna1d, Kcnc3, Kcnc4, Kctd21, Scn11a, Scn4b, Scn5a, Scn8a                            | mmu-let-7a, mmu-let-7b, mmu-let-7c, mmu-let-7e, mmu-let-7f, mmu-miR-98 |
| GO:0035985 | senescence-associated heterochromatin focus | Hmga1, Hmga2                                                                                 | mmu-let-7a, mmu-let-7b, mmu-let-7c, mmu-let-7e, mmu-let-7f, mmu-miR-98 |
| GO:0042581 | specific granule                            | Snap23, Stx3                                                                                 | mmu-let-7a, mmu-let-7b, mmu-let-7c, mmu-let-7e, mmu-let-7f, mmu-miR-98 |
| GO:0042582 | azurophil granule                           | Snap23, Stx3                                                                                 | mmu-let-7a, mmu-let-7b, mmu-let-7c, mmu-let-7e, mmu-let-7f, mmu-miR-98 |
| GO:0042598 | vesicular fraction                          | Adrb2, Cpd, Dlst, Dmd, Dnajc1, Fndc3a, Igf1r, Insr, Nat8l, Rdh10, Snap23, Srebf2, Syt2, Tsc1 | mmu-let-7a, mmu-let-7b, mmu-let-7c, mmu-let-7e, mmu-let-7f, mmu-miR-98 |
| GO:0042734 | presynaptic membrane                        | Gabra6, Grik2, Grin2b, Syt1                                                                  | mmu-let-7a, mmu-let-7b, mmu-let-7c, mmu-let-7e, mmu-let-7f, mmu-miR-98 |
| GO:0043005 | neuron projection                           | Bsn, Dmd, Esr2, Igf1r, Rufy3, Stx3, Syt1, Tmod2, Tsc1, Utrn                                  | mmu-let-7a, mmu-let-7b, mmu-let-7c, mmu-let-7e, mmu-let-7f, mmu-miR-98 |
| GO:0043235 | receptor complex                            | Acvr1c, Adrb2, Adrb3, Gabra6, Grik2, Grin2b, Il6, Insr, Osmr, Tgfbr1                         | mmu-let-7a, mmu-let-7b, mmu-let-7c, mmu-let-7e, mmu-let-7f, mmu-miR-98 |
| GO:0044432 | endoplasmic reticulum part                  | Abcb9, Agpat6, Dnajc1, Eda, Edem1, Edem3, Elovl4, Ero1l, Nat8l, Piga, Srebf2, Stx17, Ugg1    | mmu-let-7a, mmu-let-7b, mmu-let-7c, mmu-let-7e, mmu-let-7f, mmu-miR-98 |

|            |                                           |                                                                                                                                                                                                                                                       |                                                                        |
|------------|-------------------------------------------|-------------------------------------------------------------------------------------------------------------------------------------------------------------------------------------------------------------------------------------------------------|------------------------------------------------------------------------|
| GO:0044451 | nucleoplasm part                          | Cbx5, Chd4, Coil, Cpsf4, Dyrk1a, E2f6, Ercc6, Ezh2, Ikbkap, Ikbke, Ing3, Ints2, Med8, Mll2, Polr3d, Ppargc1b, Senp2, Skil, Spnb4, Zbtb16, Elf4                                                                                                        | mmu-let-7a, mmu-let-7b, mmu-let-7c, mmu-let-7e, mmu-let-7f, mmu-miR-98 |
| GO:0044459 | plasma membrane part                      | Abcg1, C230081A13Rik, Cask, Ccr7, Cd200r1, Cd276, Cd86, Cgnl1, Clasp2, Cldn12, Dmd, Eea1, Gnal, Hic2, Il13, Lmln, Lor, Marveld2, Olr1, Pak1, Pdgfb, Prkaa2, Prkab2, Slc26a9, Slc30a1, Slc4a7, Slc5a6, Snx5, Stx3, Tgfbr1, Thbs1, Tmem231, Trpm6, Utrn | mmu-let-7a, mmu-let-7b, mmu-let-7c, mmu-let-7e, mmu-let-7f, mmu-miR-98 |
| GO:0044463 | cell projection part                      | Adrb2, Bsn, Clasp2, Dmd, Epha4, Gipc1, Grid2ip, Grik2, Grin2b, Kcnc3, Kcnc4, Mapk8, Nefm, Pak1, Ruffy3, Scn8a, Sema4c, Slc5a6, Slc8a2, Spnb4, Stx3, Tmem231, Tmod2, Tnfrsf1b, Trpm6, Tsc1, Utrn                                                       | mmu-let-7a, mmu-let-7b, mmu-let-7c, mmu-let-7e, mmu-let-7f, mmu-miR-98 |
| GO:0045202 | synapse                                   | Bsn, Cask, Dlgap1, Dlgap4, Dmd, Gabra6, Gipc1, Gpr156, Grid2ip, Grik2, Grin2b, Homer2, Insr, Mgl1, P2rx1, Psd3, Sema4c, Sema4f, Snap23, Syt1, Syt11, Syt2                                                                                             | mmu-let-7a, mmu-let-7b, mmu-let-7c, mmu-let-7e, mmu-let-7f, mmu-miR-98 |
| GO:0045211 | postsynaptic membrane                     | Dlgap1, Epha4, Gabra6, Gpr156, Grid2ip, Grik2, Grin2b, Homer2, P2rx1, Psd3, Sema4c, Sema4f                                                                                                                                                            | mmu-let-7a, mmu-let-7b, mmu-let-7c, mmu-let-7e, mmu-let-7f, mmu-miR-98 |
| GO:0070195 | growth hormone receptor complex           | Ghr                                                                                                                                                                                                                                                   | mmu-let-7a, mmu-let-7b, mmu-let-7c, mmu-let-7e, mmu-let-7f, mmu-miR-98 |
| GO:0070685 | macropinocytic cup                        | Snx5                                                                                                                                                                                                                                                  | mmu-let-7a, mmu-let-7b, mmu-let-7c, mmu-let-7e, mmu-let-7f, mmu-miR-98 |
| GO:0070971 | endoplasmic reticulum exit site           | Tmed5                                                                                                                                                                                                                                                 | mmu-let-7a, mmu-let-7b, mmu-let-7c, mmu-let-7e, mmu-let-7f, mmu-miR-98 |
| GO:0071204 | histone pre-mRNA 3'end processing complex | Lsm11, Syncrip                                                                                                                                                                                                                                        | mmu-let-7a, mmu-let-7b, mmu-let-7c, mmu-let-7e, mmu-let-7f, mmu-miR-98 |
|            |                                           |                                                                                                                                                                                                                                                       |                                                                        |

| GO ID (biological process) | Go Term (biological process GO Term)                                     | Gene Symbol (genes enriched by up-regulated miRNAs)                                                                                                                                                 | Up-regulated miRNAs                                                    |
|----------------------------|--------------------------------------------------------------------------|-----------------------------------------------------------------------------------------------------------------------------------------------------------------------------------------------------|------------------------------------------------------------------------|
| GO:0000082                 | G1/S transition of mitotic cell cycle                                    | Acvr1b, Ccnd2, Cdc25a, E2f5, Phf8                                                                                                                                                                   | mmu-let-7a, mmu-let-7b, mmu-let-7c, mmu-let-7e, mmu-let-7f, mmu-miR-98 |
| GO:0000083                 | regulation of transcription involved in G1/S phase of mitotic cell cycle | Bach1, E2f6, Rb1                                                                                                                                                                                    | mmu-let-7a, mmu-let-7b, mmu-let-7c, mmu-let-7e, mmu-let-7f, mmu-miR-98 |
| GO:0000084                 | S phase of mitotic cell cycle                                            | Dcun1d3, Ezh2, Lsm11, Rb1                                                                                                                                                                           | mmu-let-7a, mmu-let-7b, mmu-let-7c, mmu-let-7e, mmu-let-7f, mmu-miR-98 |
| GO:0000117                 | regulation of transcription involved in G2/M-phase of mitotic cell cycle | Bach1                                                                                                                                                                                               | mmu-let-7a, mmu-let-7b, mmu-let-7c, mmu-let-7e, mmu-let-7f, mmu-miR-98 |
| GO:0000122                 | negative regulation of transcription from RNA polymerase II promoter     | Bach1, Cbx2, Cry2, Edn1, Esr2, Foxp2, Gabpa, Hand1, Hic1, Hmga2, Lcor, Mdfi, Nkap, Nr6a1, Ppara, Prdm1, Prrx1, Rb1, Sall4, Skil, Srebf2, Taf9b, Wnt1, Wnt9a, Wnt9b, Zbtb10, Zfp354a                 | mmu-let-7a, mmu-let-7b, mmu-let-7c, mmu-let-7e, mmu-let-7f, mmu-miR-98 |
| GO:0000188                 | inactivation of MAPK activity                                            | Dusp1, Dusp16, Dusp4, Spred3                                                                                                                                                                        | mmu-let-7a, mmu-let-7b, mmu-let-7c, mmu-let-7e, mmu-let-7f, mmu-miR-98 |
| GO:0000278                 | mitotic cell cycle                                                       | Acvr1b, Ahctf1, Arpp19, Bach1, Bcat1, Bcl2l1, Ccnd1, Ccnd2, Ccny, Cdc25a, Clasp2, Dcun1d3, E2f5, E2f6, Edn1, Ezh2, Hmga2, Insr, Klh9, Lmln, Lsm11, Nek3, Nme6, Pdgfb, Phf8, Pogz, Rb1, Usp47, Wnt9a | mmu-let-7a, mmu-let-7b, mmu-let-7c, mmu-let-7e, mmu-let-7f, mmu-miR-98 |

|            |                                     |                                                                                                                                                                                                                                       |                                                                        |
|------------|-------------------------------------|---------------------------------------------------------------------------------------------------------------------------------------------------------------------------------------------------------------------------------------|------------------------------------------------------------------------|
| GO:000302  | response to reactive oxygen species | Casp3, Ercc6, Il6, Mapk8, Ppargc1b, Pxdn                                                                                                                                                                                              | mmu-let-7a, mmu-let-7b, mmu-let-7c, mmu-let-7e, mmu-let-7f, mmu-miR-98 |
| GO:000902  | cell morphogenesis                  | Bin3, Brwd1, C230081A13Rik, Cap1, Cap2, Dlc1, Dmd, Eph4, Esrrb, Gas7, Hmga2, Igf1r, Il6, Iqcb1, Limd1, Lmx1a, Nefm, Ngf, Ntn1, Pak1, Pla2g3, Rb1, Rbpj, Rufy3, Sema4f, Skil, Spnb4, Tgfbr1, Tgfbr3, Tmem231, Tnik, Ulk2, Unc5a, Wnt9b | mmu-let-7a, mmu-let-7b, mmu-let-7c, mmu-let-7e, mmu-let-7f, mmu-miR-98 |
| GO:000910  | cytokinesis                         | Ahctf1, Bcl2l1, Bin3, Calm1, Igf1r, Kihl9, Rab11fip4, Ralb, Zfyve26                                                                                                                                                                   | mmu-let-7a, mmu-let-7b, mmu-let-7c, mmu-let-7e, mmu-let-7f, mmu-miR-98 |
| GO:0001655 | urogenital system development       | Esr2, Frs2, Gcnt4, Igf1r, Lgr4, Pbx1, Pdgfb, Prlr, Rdh10, Tet2, Tgfbr1, Tsc1, Wnt9b, Zbtb16                                                                                                                                           | mmu-let-7a, mmu-let-7b, mmu-let-7c, mmu-let-7e, mmu-let-7f, mmu-miR-98 |
| GO:0001662 | behavioral fear response            | Esr2, Grik2, Grin2b                                                                                                                                                                                                                   | mmu-let-7a, mmu-let-7b, mmu-let-7c, mmu-let-7e, mmu-let-7f, mmu-miR-98 |
| GO:0001701 | in utero embryonic development      | Acvr1b, Apba1, Bcl2l1, Edn1, Etnk2, Gabpa, Grin2b, Mll2, Rcn1, Rdh10, Slc30a1, Wnt9b                                                                                                                                                  | mmu-let-7a, mmu-let-7b, mmu-let-7c, mmu-let-7e, mmu-let-7f, mmu-miR-98 |
| GO:0001706 | endoderm formation                  | Dusp1, Dusp4, Hmga2                                                                                                                                                                                                                   | mmu-let-7a, mmu-let-7b, mmu-let-7c, mmu-let-7e, mmu-let-7f, mmu-miR-98 |
| GO:0001823 | mesonephros development             | Wnt9b, Zbtb16                                                                                                                                                                                                                         | mmu-let-7a, mmu-let-7b, mmu-let-7c, mmu-let-7e, mmu-let-7f, mmu-miR-98 |
| GO:0001824 | blastocyst development              | Acvr1c, Sall4, Tgfbr1, Tgfbr3                                                                                                                                                                                                         | mmu-let-7a, mmu-let-7b, mmu-let-7c, mmu-let-7e, mmu-let-7f, mmu-miR-98 |

|            |                                                |                                                                                    |                                                                        |
|------------|------------------------------------------------|------------------------------------------------------------------------------------|------------------------------------------------------------------------|
| GO:0001825 | blastocyst formation                           | Esrrb, Skil, Tead4                                                                 | mmu-let-7a, mmu-let-7b, mmu-let-7c, mmu-let-7e, mmu-let-7f, mmu-miR-98 |
| GO:0001830 | trophectodermal cell fate commitment           | Tead4                                                                              | mmu-let-7a, mmu-let-7b, mmu-let-7c, mmu-let-7e, mmu-let-7f, mmu-miR-98 |
| GO:0001834 | trophectodermal cell proliferation             | Acvr1c, Esrrb                                                                      | mmu-let-7a, mmu-let-7b, mmu-let-7c, mmu-let-7e, mmu-let-7f, mmu-miR-98 |
| GO:0001892 | embryonic placenta development                 | Esrrb, Hand1, Il10, Mdfi, Pdgfb, Prdm1                                             | mmu-let-7a, mmu-let-7b, mmu-let-7c, mmu-let-7e, mmu-let-7f, mmu-miR-98 |
| GO:0001928 | regulation of exocyst assembly                 | Ralb                                                                               | mmu-let-7a, mmu-let-7b, mmu-let-7c, mmu-let-7e, mmu-let-7f, mmu-miR-98 |
| GO:0001932 | regulation of protein phosphorylation          | Ezh2, Fnip1, Fnip2, Socs1, Wnt9b                                                   | mmu-let-7a, mmu-let-7b, mmu-let-7c, mmu-let-7e, mmu-let-7f, mmu-miR-98 |
| GO:0001934 | positive regulation of protein phosphorylation | Acvr2a, Braf, Ccnd1, Ccnd2, Ghr, Il13, Il6, Insr, Pak1, Rictor, Senp2, Taok1, Wnt1 | mmu-let-7a, mmu-let-7b, mmu-let-7c, mmu-let-7e, mmu-let-7f, mmu-miR-98 |
| GO:0001952 | regulation of cell-matrix adhesion             | Epha3, Ppm1f, Tsc1, Utrn                                                           | mmu-let-7a, mmu-let-7b, mmu-let-7c, mmu-let-7e, mmu-let-7f, mmu-miR-98 |
| GO:0001953 | negative regulation of cell-matrix adhesion    | Acer2, Cask, Thbs1                                                                 | mmu-let-7a, mmu-let-7b, mmu-let-7c, mmu-let-7e, mmu-let-7f, mmu-miR-98 |
| GO:0002009 | morphogenesis of an epithelium                 | Esr2, Fras1, Frem2, Igf1r, Tbx5                                                    | mmu-let-7a, mmu-let-7b, mmu-let-7c, mmu-let-7e, mmu-let-7f, mmu-miR-98 |
| GO:0002024 | diet induced thermogenesis                     | Adrb2, Adrb3                                                                       | mmu-let-7a, mmu-let-7b, mmu-let-7c, mmu-let-7e, mmu-let-7f, mmu-miR-98 |

|            |                                                                                                                  |                 |                                                                        |
|------------|------------------------------------------------------------------------------------------------------------------|-----------------|------------------------------------------------------------------------|
| GO:0002025 | vasodilation by norepinephrine-epinephrine involved in regulation of systemic arterial blood pressure            | Adrb2, Adrb3    | mmu-let-7a, mmu-let-7b, mmu-let-7c, mmu-let-7e, mmu-let-7f, mmu-miR-98 |
| GO:0002070 | epithelial cell maturation                                                                                       | Agpat6, Esr2    | mmu-let-7a, mmu-let-7b, mmu-let-7c, mmu-let-7e, mmu-let-7f, mmu-miR-98 |
| GO:0002071 | glandular epithelial cell maturation                                                                             | Agpat6          | mmu-let-7a, mmu-let-7b, mmu-let-7c, mmu-let-7e, mmu-let-7f, mmu-miR-98 |
| GO:0002294 | CD4-positive, alpha-beta T cell differentiation involved in immune response                                      | Ccr7, Il6, Rorc | mmu-let-7a, mmu-let-7b, mmu-let-7c, mmu-let-7e, mmu-let-7f, mmu-miR-98 |
| GO:0002384 | hepatic immune response                                                                                          | Il6             | mmu-let-7a, mmu-let-7b, mmu-let-7c, mmu-let-7e, mmu-let-7f, mmu-miR-98 |
| GO:0002577 | regulation of antigen processing and presentation                                                                | Ccr7, Thbs1     | mmu-let-7a, mmu-let-7b, mmu-let-7c, mmu-let-7e, mmu-let-7f, mmu-miR-98 |
| GO:0002581 | negative regulation of antigen processing and presentation of peptide or polysaccharide antigen via MHC class II | Thbs1           | mmu-let-7a, mmu-let-7b, mmu-let-7c, mmu-let-7e, mmu-let-7f, mmu-miR-98 |
| GO:0002605 | negative regulation of dendritic cell antigen processing and presentation                                        | Thbs1           | mmu-let-7a, mmu-let-7b, mmu-let-7c, mmu-let-7e, mmu-let-7f, mmu-miR-98 |

|            |                                                                              |                                                                                                                      |                                                                        |
|------------|------------------------------------------------------------------------------|----------------------------------------------------------------------------------------------------------------------|------------------------------------------------------------------------|
| GO:0002632 | negative regulation of granuloma formation                                   | Tnfaip3                                                                                                              | mmu-let-7a, mmu-let-7b, mmu-let-7c, mmu-let-7e, mmu-let-7f, mmu-miR-98 |
| GO:0002644 | negative regulation of tolerance induction                                   | Cd86                                                                                                                 | mmu-let-7a, mmu-let-7b, mmu-let-7c, mmu-let-7e, mmu-let-7f, mmu-miR-98 |
| GO:0002668 | negative regulation of T cell anergy                                         | Cd86                                                                                                                 | mmu-let-7a, mmu-let-7b, mmu-let-7c, mmu-let-7e, mmu-let-7f, mmu-miR-98 |
| GO:0002676 | regulation of chronic inflammatory response                                  | Il10, Tnfaip3                                                                                                        | mmu-let-7a, mmu-let-7b, mmu-let-7c, mmu-let-7e, mmu-let-7f, mmu-miR-98 |
| GO:0002875 | negative regulation of chronic inflammatory response to antigenic stimulus   | Il10                                                                                                                 | mmu-let-7a, mmu-let-7b, mmu-let-7c, mmu-let-7e, mmu-let-7f, mmu-miR-98 |
| GO:0003001 | generation of a signal involved in cell-cell signaling                       | Acvr1c, Acvr2a, Apba1, Edn1, Gipc1, Grin2b, Hmga2, Il6, Kcnc3, Kcnc4, Ngf, P2rx1, Rab8b, Rfx6, Slc30a1, Slc6a1, Syt1 | mmu-let-7a, mmu-let-7b, mmu-let-7c, mmu-let-7e, mmu-let-7f, mmu-miR-98 |
| GO:0003002 | regionalization                                                              | Acvr2a, Chrd, Edn1, Frs2, Mapk8, Mdfi, Pbx1, Pbx2, Senp2, Tcf7l1, Tgfbr1, Wnt1, Wnt9a, Wnt9b, Zbtb16                 | mmu-let-7a, mmu-let-7b, mmu-let-7c, mmu-let-7e, mmu-let-7f, mmu-miR-98 |
| GO:0003044 | regulation of systemic arterial blood pressure mediated by a chemical signal | Adrb2, Adrb3, Edn1, Ndst2                                                                                            | mmu-let-7a, mmu-let-7b, mmu-let-7c, mmu-let-7e, mmu-let-7f, mmu-miR-98 |
| GO:0003059 | positive regulation of the force of heart contraction by epinephrine         | Adrb2                                                                                                                | mmu-let-7a, mmu-let-7b, mmu-let-7c, mmu-let-7e, mmu-let-7f, mmu-miR-98 |
| GO:0003104 | positive regulation of glomerular filtration                                 | Pdgfb                                                                                                                | mmu-let-7a, mmu-let-7b, mmu-let-7c, mmu-let-7e, mmu-let-7f, mmu-miR-98 |

|            |                                                  |                                                                                                                                                                                                                                                               |                                                                        |
|------------|--------------------------------------------------|---------------------------------------------------------------------------------------------------------------------------------------------------------------------------------------------------------------------------------------------------------------|------------------------------------------------------------------------|
| GO:0003131 | mesodermal-endodermal cell signaling             | Hmga2                                                                                                                                                                                                                                                         | mmu-let-7a, mmu-let-7b, mmu-let-7c, mmu-let-7e, mmu-let-7f, mmu-miR-98 |
| GO:0003144 | embryonic heart tube formation                   | Hand1                                                                                                                                                                                                                                                         | mmu-let-7a, mmu-let-7b, mmu-let-7c, mmu-let-7e, mmu-let-7f, mmu-miR-98 |
| GO:0003207 | cardiac chamber formation                        | Hand1, Tbx5                                                                                                                                                                                                                                                   | mmu-let-7a, mmu-let-7b, mmu-let-7c, mmu-let-7e, mmu-let-7f, mmu-miR-98 |
| GO:0003218 | cardiac left ventricle formation                 | Hand1, Tbx5                                                                                                                                                                                                                                                   | mmu-let-7a, mmu-let-7b, mmu-let-7c, mmu-let-7e, mmu-let-7f, mmu-miR-98 |
| GO:0003311 | pancreatic D cell differentiation                | Rfx6                                                                                                                                                                                                                                                          | mmu-let-7a, mmu-let-7b, mmu-let-7c, mmu-let-7e, mmu-let-7f, mmu-miR-98 |
| GO:0006066 | alcohol metabolic process                        | Abcg1, Acer2, Agpat6, Arpp19, Cmah, Cyp46a1, Etnk1, Etnk2, Gale, Gcnt4, Gdpd1, Hdlbp, Hk2, Il6, Insr, Mbtps2, Pcx, Pcyt1b, Pgm2l1, Pla2g15, Ppara, Prkaa2, Sreb2                                                                                              | mmu-let-7a, mmu-let-7b, mmu-let-7c, mmu-let-7e, mmu-let-7f, mmu-miR-98 |
| GO:0006107 | oxaloacetate metabolic process                   | Ghr, Pcx                                                                                                                                                                                                                                                      | mmu-let-7a, mmu-let-7b, mmu-let-7c, mmu-let-7e, mmu-let-7f, mmu-miR-98 |
| GO:0006109 | regulation of carbohydrate metabolic process     | Acer2, Arpp19, Il6, Insr, Ppara, Prkaa2                                                                                                                                                                                                                       | mmu-let-7a, mmu-let-7b, mmu-let-7c, mmu-let-7e, mmu-let-7f, mmu-miR-98 |
| GO:0006139 | nucleobase-containing compound metabolic process | Abcb9, Abcc10, Adrb3, Aldh6a1, Arhgap20, Arhgap28, Arhgef15, Ccr7, Cmah, Crk, Ctns, Ddx19a, Dhx57, Dlc1, Dlst, Entpd7, Epha3, Epha4, Gipc1, Gnal, Htr4, Lonrf3, Nkiras2, Nme4, Nme6, Plekhg6, Ralb, Rasl10b, Rgs16, Rictor, Srgap3, Stard13, Tgds, Tsc1, Vav3 | mmu-let-7a, mmu-let-7b, mmu-let-7c, mmu-let-7e, mmu-let-7f, mmu-miR-98 |



|            |                                                             |                                                                                                                                                                                                                                                                     |                                                                        |
|------------|-------------------------------------------------------------|---------------------------------------------------------------------------------------------------------------------------------------------------------------------------------------------------------------------------------------------------------------------|------------------------------------------------------------------------|
| GO:0006140 | regulation of nucleotide metabolic process                  | Adrb2, Adrb3, Arhgap20, Arhgap28, Arhgef15, Ccr7, Crk, Dlc1, Edn1, Epha3, Epha4, Gipc1, Gnal, Htr4, Plekhg6, Rgs16, Rictor, Srgap3, Stard13, Tsc1, Vav3                                                                                                             | mmu-let-7a, mmu-let-7b, mmu-let-7c, mmu-let-7e, mmu-let-7f, mmu-miR-98 |
| GO:0006163 | purine nucleotide metabolic process                         | Abcb9, Abcc10, Abcg1, Adrb2, Adrb3, Arhgap20, Arhgap28, Arhgef15, Ccr7, Chd4, Crk, Ctns, Ddx19a, Dhx57, Dlc1, Edn1, Epha3, Epha4, Ercc6, Gipc1, Gnal, Htr4, Lonrf3, Nkiras2, Nme4, Nme6, Plekhg6, Ralb, Rasl10b, Rgs16, Rictor, Srgap3, Stard13, Trank1, Tsc1, Vav3 | mmu-let-7a, mmu-let-7b, mmu-let-7c, mmu-let-7e, mmu-let-7f, mmu-miR-98 |
| GO:0006165 | nucleoside diphosphate phosphorylation                      | Nme4, Nme6                                                                                                                                                                                                                                                          | mmu-let-7a, mmu-let-7b, mmu-let-7c, mmu-let-7e, mmu-let-7f, mmu-miR-98 |
| GO:0006183 | GTP biosynthetic process                                    | Nme4, Nme6                                                                                                                                                                                                                                                          | mmu-let-7a, mmu-let-7b, mmu-let-7c, mmu-let-7e, mmu-let-7f, mmu-miR-98 |
| GO:0006184 | GTP catabolic process                                       | Arhgap20, Arhgap28, Arhgef15, Ccr7, Crk, Dlc1, Epha3, Epha4, Gipc1, Gnal, Nkiras2, Plekhg6, Ralb, Rasl10b, Rgs16, Rictor, Srgap3, Stard13, Tsc1, Vav3                                                                                                               | mmu-let-7a, mmu-let-7b, mmu-let-7c, mmu-let-7e, mmu-let-7f, mmu-miR-98 |
| GO:0006228 | UTP biosynthetic process                                    | Nme4, Nme6                                                                                                                                                                                                                                                          | mmu-let-7a, mmu-let-7b, mmu-let-7c, mmu-let-7e, mmu-let-7f, mmu-miR-98 |
| GO:0006241 | CTP biosynthetic process                                    | Nme4, Nme6                                                                                                                                                                                                                                                          | mmu-let-7a, mmu-let-7b, mmu-let-7c, mmu-let-7e, mmu-let-7f, mmu-miR-98 |
| GO:0006284 | base-excision repair                                        | Ercc6, Hmga1, Hmga2, Usp47                                                                                                                                                                                                                                          | mmu-let-7a, mmu-let-7b, mmu-let-7c, mmu-let-7e, mmu-let-7f, mmu-miR-98 |
| GO:0006357 | regulation of transcription from RNA polymerase II promoter | Brwd1, Ezh2, Ikbkap, Lcorl, Med8, Onecut3, Rorc, Sub1                                                                                                                                                                                                               | mmu-let-7a, mmu-let-7b, mmu-let-7c, mmu-let-7e, mmu-let-7f, mmu-miR-98 |

|            |                                               |                                                                                                                                                                                                                           |                                                                        |
|------------|-----------------------------------------------|---------------------------------------------------------------------------------------------------------------------------------------------------------------------------------------------------------------------------|------------------------------------------------------------------------|
| GO:0006405 | RNA export from nucleus                       | Thoc1, Thoc2, Tsc1, Zc3h3                                                                                                                                                                                                 | mmu-let-7a, mmu-let-7b, mmu-let-7c, mmu-let-7e, mmu-let-7f, mmu-miR-98 |
| GO:0006409 | tRNA export from nucleus                      | Xpot                                                                                                                                                                                                                      | mmu-let-7a, mmu-let-7b, mmu-let-7c, mmu-let-7e, mmu-let-7f, mmu-miR-98 |
| GO:0006417 | regulation of translation                     | Dnajc1, Eif2c4, Eif4g2, Igf2bp2, Igf2bp3, Il6, Lin28a, Tarbp2, Thbs1, Tia1, Tsc1                                                                                                                                          | mmu-let-7a, mmu-let-7b, mmu-let-7c, mmu-let-7e, mmu-let-7f, mmu-miR-98 |
| GO:0006468 | protein phosphorylation                       | Acvr1c, Cask, Epha3, Frk, Ikbkap, Ikbke, Limk2, Map4k3, Map4k4, Mapk11, Mapk6, Nek3, Obscn, Riok3, Rorc, Scyl3, Speg, Stk40, Styk1, Tgfr3, Trib2, Trpm6                                                                   | mmu-let-7a, mmu-let-7b, mmu-let-7c, mmu-let-7e, mmu-let-7f, mmu-miR-98 |
| GO:0006470 | protein dephosphorylation                     | Dlc1, Dusp1, Dusp16, Dusp22, Dusp4, Nceh1, Ppp2r2a, Ptpd, Ptpn                                                                                                                                                            | mmu-let-7a, mmu-let-7b, mmu-let-7c, mmu-let-7e, mmu-let-7f, mmu-miR-98 |
| GO:0006486 | protein glycosylation                         | Acer2, B3galt1, B3gnt7, Galnt1, Galnt2, Gxylt1, St6gal1, St8sia1, Ugg1                                                                                                                                                    | mmu-let-7a, mmu-let-7b, mmu-let-7c, mmu-let-7e, mmu-let-7f, mmu-miR-98 |
| GO:0006508 | proteolysis                                   | Adamts12, Adamts14, Adamts15, Adamts5, Adamts8, Atg4b, Casp3, Cpa4, Cpd, Ddi2, Dpp3, Il10, Klkb1, Lln, Lonrf3, Masp1, Mbtps2, Npepl1, Pappa, Prss22, Senp2, Senp5, Tmprss11f, Tmprss2, Tnfaip3, Tpp1, Trhde, Usp32, Mmp11 | mmu-let-7a, mmu-let-7b, mmu-let-7c, mmu-let-7e, mmu-let-7f, mmu-miR-98 |
| GO:0006511 | ubiquitin-dependent protein catabolic process | Cdc34, Dnajb9, Edem1, Edem3, Fbxl12, Fbxl14, Gipc1, Map3k1, Rnf20, Trib1, Trib2, Uhrf2, Usp12, Usp24, Usp38, Usp47, Wnt1, Yod1                                                                                            | mmu-let-7a, mmu-let-7b, mmu-let-7c, mmu-let-7e, mmu-let-7f, mmu-miR-98 |
| GO:0006574 | valine catabolic process                      | Aldh6a1                                                                                                                                                                                                                   | mmu-let-7a, mmu-let-7b, mmu-let-7c, mmu-let-7e, mmu-let-7f, mmu-miR-98 |
| GO:0006580 | ethanolamine metabolic process                | Etnk1, Etnk2                                                                                                                                                                                                              | mmu-let-7a, mmu-let-7b, mmu-let-7c, mmu-let-7e, mmu-let-7f, mmu-miR-98 |

|            |                                               |                                                                                                                          |                                                                        |
|------------|-----------------------------------------------|--------------------------------------------------------------------------------------------------------------------------|------------------------------------------------------------------------|
| GO:0006600 | creatine metabolic process                    | Gatm, Ghr                                                                                                                | mmu-let-7a, mmu-let-7b, mmu-let-7c, mmu-let-7e, mmu-let-7f, mmu-miR-98 |
| GO:0006631 | fatty acid metabolic process                  | Acot11, Adipor2, Agpat6, Edn1, Elovl4, Ghr, Lipt2, Mgl1, Pla2g15, Ppara, Ppargc1a, Prkaa2, Prkab2, Scd2                  | mmu-let-7a, mmu-let-7b, mmu-let-7c, mmu-let-7e, mmu-let-7f, mmu-miR-98 |
| GO:0006646 | phosphatidylethanolamine biosynthetic process | Etnk1, Etnk2                                                                                                             | mmu-let-7a, mmu-let-7b, mmu-let-7c, mmu-let-7e, mmu-let-7f, mmu-miR-98 |
| GO:0006814 | sodium ion transport                          | Adrb2, Slc10a6, Slc24a6, Slc38a9, Slc4a4, Slc5a9, Slc8a2                                                                 | mmu-let-7a, mmu-let-7b, mmu-let-7c, mmu-let-7e, mmu-let-7f, mmu-miR-98 |
| GO:0006836 | neurotransmitter transport                    | Kcnc3, Kcnc4, Nat8l, Ngf, Slc30a1, Slc6a1, Stx3, Syt1                                                                    | mmu-let-7a, mmu-let-7b, mmu-let-7c, mmu-let-7e, mmu-let-7f, mmu-miR-98 |
| GO:0006865 | amino acid transport                          | Apba1, Ctns, Slc38a9, Slc5a6, Slc6a1, Slc7a14, Xk                                                                        | mmu-let-7a, mmu-let-7b, mmu-let-7c, mmu-let-7e, mmu-let-7f, mmu-miR-98 |
| GO:0006885 | regulation of pH                              | Edn1, Fasl, Slc26a9, Slc4a4                                                                                              | mmu-let-7a, mmu-let-7b, mmu-let-7c, mmu-let-7e, mmu-let-7f, mmu-miR-98 |
| GO:0006906 | vesicle fusion                                | Eea1, Pldn, Vav3                                                                                                         | mmu-let-7a, mmu-let-7b, mmu-let-7c, mmu-let-7e, mmu-let-7f, mmu-miR-98 |
| GO:0006915 | apoptotic process                             | Bcap29, Dpf2, E2f2, Ntn1, Pacs2, Peg10, Ppm1f, Ppp2r1b, Ralb, Slk, Taok1, Tia1, Unc5a                                    | mmu-let-7a, mmu-let-7b, mmu-let-7c, mmu-let-7e, mmu-let-7f, mmu-miR-98 |
| GO:0006917 | induction of apoptosis                        | Abcb9, Acvr1b, Aen, Casp3, Ddx19a, Dlc1, Ercc6, Fasl, Fnip2, Hic1, Hip1, Ikbke, Mapk8, Plagl2, Rnf7, Tbx5, Tgfbr1, Thbs1 | mmu-let-7a, mmu-let-7b, mmu-let-7c, mmu-let-7e, mmu-let-7f, mmu-miR-98 |

|            |                                                                                  |                                                                                                                                                   |                                                                        |
|------------|----------------------------------------------------------------------------------|---------------------------------------------------------------------------------------------------------------------------------------------------|------------------------------------------------------------------------|
| GO:0006919 | activation of cysteine-type endopeptidase activity involved in apoptotic process | Dlc1, Fasl, Hip1, P2rx1, Rnf7                                                                                                                     | mmu-let-7a, mmu-let-7b, mmu-let-7c, mmu-let-7e, mmu-let-7f, mmu-miR-98 |
| GO:0006986 | response to unfolded protein                                                     | Ccnd1, Edem1, Edem3, Ero1l, Ubxn4, Yod1                                                                                                           | mmu-let-7a, mmu-let-7b, mmu-let-7c, mmu-let-7e, mmu-let-7f, mmu-miR-98 |
| GO:0007049 | cell cycle                                                                       | Bin3, Calm1, Cdc34, Cep110, Cep120, Cep135, Dusp1, E2f2, Mapk6, Nras, Rab11fip4, Ralb, Senp5, Stard13, Suv39h2, Tet2, Uhrf2, Wasl, Zfyve26, Ercc4 | mmu-let-7a, mmu-let-7b, mmu-let-7c, mmu-let-7e, mmu-let-7f, mmu-miR-98 |
| GO:0007050 | cell cycle arrest                                                                | Bcat1, Bcl2l1, Ccnd1, Ezh2, Hmga2, Rb1, Rbm38, Skil, Taok1, Thbs1, Wnt9a                                                                          | mmu-let-7a, mmu-let-7b, mmu-let-7c, mmu-let-7e, mmu-let-7f, mmu-miR-98 |
| GO:0007064 | mitotic sister chromatid cohesion                                                | Pogz, Rb1                                                                                                                                         | mmu-let-7a, mmu-let-7b, mmu-let-7c, mmu-let-7e, mmu-let-7f, mmu-miR-98 |
| GO:0007162 | negative regulation of cell adhesion                                             | Acer2, Cask, Myo1f, Thbs1, Tnfaip3, Wnt1                                                                                                          | mmu-let-7a, mmu-let-7b, mmu-let-7c, mmu-let-7e, mmu-let-7f, mmu-miR-98 |
| GO:0007167 | enzyme linked receptor protein signaling pathway                                 | Acvr1b, Acvr1c, Acvr2a, Chrd, Col1a2, Col3a1, Dusp22, Gdf6, Gipc1, Map3k1, Nlk, Peg10, Skil, Tgfbr1, Tgfbr3, Trim33                               | mmu-let-7a, mmu-let-7b, mmu-let-7c, mmu-let-7e, mmu-let-7f, mmu-miR-98 |
| GO:0007169 | transmembrane receptor protein tyrosine kinase signaling pathway                 | Al464131, Esr2, Fasl, Ghr, Igf1r, Insr, Ngf, Nrtn, Prlr, Smarcc1, Socs1, Socs7, Wnt1                                                              | mmu-let-7a, mmu-let-7b, mmu-let-7c, mmu-let-7e, mmu-let-7f, mmu-miR-98 |
| GO:0007179 | transforming growth factor beta receptor signaling pathway                       | Col1a2, Col3a1, Dusp22, Map3k1, Nlk, Pdgfb, Tgfbr1, Trim33                                                                                        | mmu-let-7a, mmu-let-7b, mmu-let-7c, mmu-let-7e, mmu-let-7f, mmu-miR-98 |

|            |                                                                 |                                                                                                                                                            |                                                                        |
|------------|-----------------------------------------------------------------|------------------------------------------------------------------------------------------------------------------------------------------------------------|------------------------------------------------------------------------|
| GO:0007181 | transforming growth factor beta receptor complex assembly       | Acvr1c, Tgfbr3                                                                                                                                             | mmu-let-7a, mmu-let-7b, mmu-let-7c, mmu-let-7e, mmu-let-7f, mmu-miR-98 |
| GO:0007189 | activation of adenylate cyclase activity by G-protein signaling | Adrb2, Adrb3, Gnal, Htr4                                                                                                                                   | mmu-let-7a, mmu-let-7b, mmu-let-7c, mmu-let-7e, mmu-let-7f, mmu-miR-98 |
| GO:0007216 | G-protein coupled glutamate receptor signaling pathway          | Grid2ip, Homer2                                                                                                                                            | mmu-let-7a, mmu-let-7b, mmu-let-7c, mmu-let-7e, mmu-let-7f, mmu-miR-98 |
| GO:0007256 | activation of JNKK activity                                     | Ercc6, Map3k1, Tnik                                                                                                                                        | mmu-let-7a, mmu-let-7b, mmu-let-7c, mmu-let-7e, mmu-let-7f, mmu-miR-98 |
| GO:0007257 | activation of JUN kinase activity                               | Ccr7, Ercc6, Map3k1, Mdfi                                                                                                                                  | mmu-let-7a, mmu-let-7b, mmu-let-7c, mmu-let-7e, mmu-let-7f, mmu-miR-98 |
| GO:0007270 | neuron-neuron synaptic transmission                             | Adrb2, Gabra6, Grik2, Nat8l, P2rx1, Slc6a1, Tmod2                                                                                                          | mmu-let-7a, mmu-let-7b, mmu-let-7c, mmu-let-7e, mmu-let-7f, mmu-miR-98 |
| GO:0007281 | germ cell development                                           | Bcl2l1, Fndc3a, Hook1, Lin28a, Mll2, Prdm1, Strbp, Zbtb16                                                                                                  | mmu-let-7a, mmu-let-7b, mmu-let-7c, mmu-let-7e, mmu-let-7f, mmu-miR-98 |
| GO:0007350 | blastoderm segmentation                                         | Frs2, Tcf7l1                                                                                                                                               | mmu-let-7a, mmu-let-7b, mmu-let-7c, mmu-let-7e, mmu-let-7f, mmu-miR-98 |
| GO:0007369 | gastrulation                                                    | Acvr2a, Chrd, Dusp1, Dusp4, Frs2, Hand1, Hmga2, Tnfaip3                                                                                                    | mmu-let-7a, mmu-let-7b, mmu-let-7c, mmu-let-7e, mmu-let-7f, mmu-miR-98 |
| GO:0007417 | central nervous system development                              | Cep120, Chrd, Ctns, Dlc1, Epha4, Esr2, Ezh2, Foxp2, Frs2, Hmga2, Igf1r, Lingo1, Lmx1a, Mycn, Pbx3, Rbpj, Sall3, Sema4c, Slc4a7, Tcf7l1, Tsc1, Wnt1, Zbtb16 | mmu-let-7a, mmu-let-7b, mmu-let-7c, mmu-let-7e, mmu-let-7f, mmu-miR-98 |

|            |                                           |                                                                                                                                                                 |                                                                        |
|------------|-------------------------------------------|-----------------------------------------------------------------------------------------------------------------------------------------------------------------|------------------------------------------------------------------------|
| GO:0007431 | salivary gland development                | Eda, Il6, Pdgfb, Plxnd1                                                                                                                                         | mmu-let-7a, mmu-let-7b, mmu-let-7c, mmu-let-7e, mmu-let-7f, mmu-miR-98 |
| GO:0007517 | muscle organ development                  | Acta1, Adrb2, Al464131, Col4a1, Col4a5, Dmd, Foxp2, Hand1, Il6, Pak1, Rbm38, Scn8a, Skil, Tbx5, Tgfbr3, Utrn, Wnt1                                              | mmu-let-7a, mmu-let-7b, mmu-let-7c, mmu-let-7e, mmu-let-7f, mmu-miR-98 |
| GO:0007519 | skeletal muscle tissue development        | Acta1, Adrb2, Al464131, Col4a1, Col4a5, Dmd, Foxp2, Pak1, Rbm38, Skil, Utrn, Wnt1                                                                               | mmu-let-7a, mmu-let-7b, mmu-let-7c, mmu-let-7e, mmu-let-7f, mmu-miR-98 |
| GO:0007528 | neuromuscular junction development        | Col4a1, Col4a5, Pak1, Utrn                                                                                                                                      | mmu-let-7a, mmu-let-7b, mmu-let-7c, mmu-let-7e, mmu-let-7f, mmu-miR-98 |
| GO:0007548 | sex differentiation                       | Acvr2a, Bcl2l1, Cbx2, Ccnd1, Esr2, Fndc3a, Hmga2, Lgr4, Pbx1, Pcyt1b, Rdh10, Wnt9b                                                                              | mmu-let-7a, mmu-let-7b, mmu-let-7c, mmu-let-7e, mmu-let-7f, mmu-miR-98 |
| GO:0007576 | nucleolar fragmentation                   | Zfp354a                                                                                                                                                         | mmu-let-7a, mmu-let-7b, mmu-let-7c, mmu-let-7e, mmu-let-7f, mmu-miR-98 |
| GO:0007595 | lactation                                 | Agpat6, Ccnd1, Prlr                                                                                                                                             | mmu-let-7a, mmu-let-7b, mmu-let-7c, mmu-let-7e, mmu-let-7f, mmu-miR-98 |
| GO:0007638 | mechanosensory behavior                   | Foxp2, Strbp                                                                                                                                                    | mmu-let-7a, mmu-let-7b, mmu-let-7c, mmu-let-7e, mmu-let-7f, mmu-miR-98 |
| GO:0008219 | cell death                                | Bcap29, Dpf2, E2f2, Hk2, Ntn1, Olr1, P2rx1, Pacs2, Peg10, Ppm1f, Ppp2r1b, Ralb, Rb1, Slc4a7, Slk, Taok1, Tia1, Tnfrsf1b, Unc5a                                  | mmu-let-7a, mmu-let-7b, mmu-let-7c, mmu-let-7e, mmu-let-7f, mmu-miR-98 |
| GO:0008284 | positive regulation of cell proliferation | Acer2, Adrb2, Bcl2l1, Ccr7, Cd276, Cd86, Edn1, Fasl, Fgf4, Fgf5, Htr4, Insr, Mll2, Mycn, Ntn1, Osmr, Pbx1, Prrx1, Rbpj, Rrm2, St8sia1, Tbx5, Tgfbr1, Vav3, Wnt1 | mmu-let-7a, mmu-let-7b, mmu-let-7c, mmu-let-7e, mmu-let-7f, mmu-miR-98 |

|            |                                                                              |                                                                                                                                                  |                                                                        |
|------------|------------------------------------------------------------------------------|--------------------------------------------------------------------------------------------------------------------------------------------------|------------------------------------------------------------------------|
| GO:0008285 | negative regulation of cell proliferation                                    | Cask, Casp3, Cd276, Dlc1, Esr2, Hmga1, Il10, Il6, Pak1, Prdm1, Ptpru, Rb1, Rbm38, Rbpj, Tbx5, Tgfbr3, Thbs1, Tnfaip3, Trib1, Tsc1, Wnt9a, Zbtb16 | mmu-let-7a, mmu-let-7b, mmu-let-7c, mmu-let-7e, mmu-let-7f, mmu-miR-98 |
| GO:0008356 | asymmetric cell division                                                     | Wnt9b, Zbtb16                                                                                                                                    | mmu-let-7a, mmu-let-7b, mmu-let-7c, mmu-let-7e, mmu-let-7f, mmu-miR-98 |
| GO:0008543 | fibroblast growth factor receptor signaling pathway                          | Fgf4, Fgf5, Frs2, Pdgfb, Thbs1                                                                                                                   | mmu-let-7a, mmu-let-7b, mmu-let-7c, mmu-let-7e, mmu-let-7f, mmu-miR-98 |
| GO:0008595 | anterior/posterior axis specification, embryo                                | Frs2, Tcf7l1                                                                                                                                     | mmu-let-7a, mmu-let-7b, mmu-let-7c, mmu-let-7e, mmu-let-7f, mmu-miR-98 |
| GO:0008610 | lipid biosynthetic process                                                   | Abcg1, Acer2, Cercam, Dkk3, Edn1, Elovl4, Igf1r, Lipt2, Mgl, P2rx1, Pbx1, Prkaa2, Prkab2, Scd2, St8sia1, Ugcg                                    | mmu-let-7a, mmu-let-7b, mmu-let-7c, mmu-let-7e, mmu-let-7f, mmu-miR-98 |
| GO:0008625 | induction of apoptosis via death domain receptors                            | Casp3, Fasl                                                                                                                                      | mmu-let-7a, mmu-let-7b, mmu-let-7c, mmu-let-7e, mmu-let-7f, mmu-miR-98 |
| GO:0008630 | DNA damage response, signal transduction resulting in induction of apoptosis | Aen, Ercc6, Fnip2, Hic1, Ikbke                                                                                                                   | mmu-let-7a, mmu-let-7b, mmu-let-7c, mmu-let-7e, mmu-let-7f, mmu-miR-98 |
| GO:0008631 | induction of apoptosis by oxidative stress                                   | Casp3, Rnf7                                                                                                                                      | mmu-let-7a, mmu-let-7b, mmu-let-7c, mmu-let-7e, mmu-let-7f, mmu-miR-98 |
| GO:0008637 | apoptotic mitochondrial changes                                              | Bcl2l1, Casp3, Hk2, Map3k1, Rnf7                                                                                                                 | mmu-let-7a, mmu-let-7b, mmu-let-7c, mmu-let-7e, mmu-let-7f, mmu-miR-98 |
| GO:0008643 | carbohydrate transport                                                       | Adipor2, Edn1, Hk2, Insr, Slc2a12, Slc35c1, Slc35d2                                                                                              | mmu-let-7a, mmu-let-7b, mmu-let-7c, mmu-let-7e, mmu-let-7f, mmu-miR-98 |

|            |                                                         |                                                                                                                                                                                                                                                   |                                                                        |
|------------|---------------------------------------------------------|---------------------------------------------------------------------------------------------------------------------------------------------------------------------------------------------------------------------------------------------------|------------------------------------------------------------------------|
| GO:0009081 | branched chain family amino acid metabolic process      | Aldh6a1, Bcat1, Ghr                                                                                                                                                                                                                               | mmu-let-7a, mmu-let-7b, mmu-let-7c, mmu-let-7e, mmu-let-7f, mmu-miR-98 |
| GO:0009100 | glycoprotein metabolic process                          | Abcg1, Acer2, B3galt1, B3gnt7, Ccr7, Edem3, Galnt1, Galnt2, Gxylt1, Insr, Ndst2, St6gal1, St8sia1, Ugg1                                                                                                                                           | mmu-let-7a, mmu-let-7b, mmu-let-7c, mmu-let-7e, mmu-let-7f, mmu-miR-98 |
| GO:0009141 | nucleoside triphosphate metabolic process               | Abcb9, Abcc10, Abcg1, Arhgap20, Arhgap28, Arhgef15, Ccr7, Chd4, Crk, Ctns, Ddx19a, Dhx57, Dlc1, Entpd7, Epha3, Epha4, Ercc6, Gipc1, Gnal, Lonrf3, Nkiras2, Nme4, Nme6, Plekhg6, Ralb, Rasl10b, Rgs16, Rictor, Srgap3, Stard13, Trank1, Tsc1, Vav3 | mmu-let-7a, mmu-let-7b, mmu-let-7c, mmu-let-7e, mmu-let-7f, mmu-miR-98 |
| GO:0009146 | purine nucleoside triphosphate catabolic process        | Abcb9, Abcc10, Abcg1, Arhgap20, Arhgap28, Arhgef15, Ccr7, Chd4, Crk, Ddx19a, Dhx57, Dlc1, Epha3, Epha4, Ercc6, Gipc1, Gnal, Lonrf3, Nkiras2, Plekhg6, Ralb, Rasl10b, Rgs16, Rictor, Srgap3, Stard13, Trank1, Tsc1, Vav3                           | mmu-let-7a, mmu-let-7b, mmu-let-7c, mmu-let-7e, mmu-let-7f, mmu-miR-98 |
| GO:0009148 | pyrimidine nucleoside triphosphate biosynthetic process | Nme4, Nme6                                                                                                                                                                                                                                        | mmu-let-7a, mmu-let-7b, mmu-let-7c, mmu-let-7e, mmu-let-7f, mmu-miR-98 |
| GO:0009154 | purine ribonucleotide catabolic process                 | Abcb9, Abcc10, Abcg1, Arhgap20, Arhgap28, Arhgef15, Ccr7, Chd4, Crk, Ddx19a, Dhx57, Dlc1, Epha3, Epha4, Ercc6, Gipc1, Gnal, Lonrf3, Nkiras2, Plekhg6, Ralb, Rasl10b, Rgs16, Rictor, Srgap3, Stard13, Trank1, Tsc1, Vav3                           | mmu-let-7a, mmu-let-7b, mmu-let-7c, mmu-let-7e, mmu-let-7f, mmu-miR-98 |
| GO:0009166 | nucleotide catabolic process                            | Abcb9, Abcc10, Abcg1, Arhgap20, Arhgap28, Arhgef15, Ccr7, Chd4, Crk, Ddx19a, Dhx57, Dlc1, Entpd7, Epha3, Epha4, Ercc6, Gipc1, Gnal, Lonrf3, Nkiras2, Plekhg6, Ralb, Rasl10b, Rgs16, Rictor, Srgap3, Stard13, Trank1, Tsc1, Vav3                   | mmu-let-7a, mmu-let-7b, mmu-let-7c, mmu-let-7e, mmu-let-7f, mmu-miR-98 |



|            |                                                          |                                                                                                                                                                                                                                                   |                                                                        |
|------------|----------------------------------------------------------|---------------------------------------------------------------------------------------------------------------------------------------------------------------------------------------------------------------------------------------------------|------------------------------------------------------------------------|
| GO:0009203 | ribonucleoside triphosphate catabolic process            | Abcb9, Abcc10, Abcg1, Arhgap20, Arhgap28, Arhgef15, Ccr7, Chd4, Crk, Ddx19a, Dhx57, Dlc1, Entpd7, Epha3, Epha4, Ercc6, Gipc1, Gnal, Lonrf3, Nkiras2, Plekhg6, Ralb, Rasl10b, Rgs16, Rictor, Srgap3, Stard13, Trank1, Tsc1, Vav3                   | mmu-let-7a, mmu-let-7b, mmu-let-7c, mmu-let-7e, mmu-let-7f, mmu-miR-98 |
| GO:0009205 | purine ribonucleoside triphosphate metabolic process     | Abcb9, Abcc10, Abcg1, Arhgap20, Arhgap28, Arhgef15, Ccr7, Chd4, Crk, Ctns, Ddx19a, Dhx57, Dlc1, Epha3, Epha4, Ercc6, Gipc1, Gnal, Lonrf3, Nkiras2, Nme4, Nme6, Plekhg6, Ralb, Rasl10b, Rgs16, Rictor, Srgap3, Stard13, Trank1, Tsc1, Vav3         | mmu-let-7a, mmu-let-7b, mmu-let-7c, mmu-let-7e, mmu-let-7f, mmu-miR-98 |
| GO:0009208 | pyrimidine ribonucleoside triphosphate metabolic process | Nme4, Nme6                                                                                                                                                                                                                                        | mmu-let-7a, mmu-let-7b, mmu-let-7c, mmu-let-7e, mmu-let-7f, mmu-miR-98 |
| GO:0009259 | ribonucleotide metabolic process                         | Abcb9, Abcc10, Abcg1, Arhgap20, Arhgap28, Arhgef15, Ccr7, Chd4, Crk, Ctns, Ddx19a, Dhx57, Dlc1, Entpd7, Epha3, Epha4, Ercc6, Gipc1, Gnal, Lonrf3, Nkiras2, Nme4, Nme6, Plekhg6, Ralb, Rasl10b, Rgs16, Rictor, Srgap3, Stard13, Trank1, Tsc1, Vav3 | mmu-let-7a, mmu-let-7b, mmu-let-7c, mmu-let-7e, mmu-let-7f, mmu-miR-98 |
| GO:0009411 | response to UV                                           | Casp3, Ccnd1, Dcun1d3, Ercc6, Mapk8, Ercc4                                                                                                                                                                                                        | mmu-let-7a, mmu-let-7b, mmu-let-7c, mmu-let-7e, mmu-let-7f, mmu-miR-98 |
| GO:0009628 | response to abiotic stimulus                             | Adrb2, Adrb3, Aen, Bcat1, Bcl2l1, Casp3, Ccnd1, Cdc25a, Clpb, Col3a1, Dcun1d3, Ercc6, Foxp2, Grin2b, Habp4, Hmga2, Kcnk18, Map3k1, Mapk8, St8sia1, Strbp, Tsc22d2, Usp47, Ercc4                                                                   | mmu-let-7a, mmu-let-7b, mmu-let-7c, mmu-let-7e, mmu-let-7f, mmu-miR-98 |
| GO:0009636 | response to toxin                                        | Ercc6, Scn8a, Slc30a1, Slc6a1, Trpm6                                                                                                                                                                                                              | mmu-let-7a, mmu-let-7b, mmu-let-7c, mmu-let-7e, mmu-let-7f, mmu-miR-98 |
| GO:0009725 | response to hormone stimulus                             | Acvr1c, Adipor2, Braf, Ccr7, Esr2, Gatm, Ghr, Il10, Il6, Insr, Mll2, Nr6a1, Pak1, Pappa, Ppara, Rorc, Smarcc1, Socs1, Socs7, Srebf2, Tgfbr1, Tgfbr3, Tsc1                                                                                         | mmu-let-7a, mmu-let-7b, mmu-let-7c, mmu-let-7e, mmu-let-7f, mmu-miR-98 |

|            |                                                    |                                                                                                                                                                                                                                             |                                                                        |
|------------|----------------------------------------------------|---------------------------------------------------------------------------------------------------------------------------------------------------------------------------------------------------------------------------------------------|------------------------------------------------------------------------|
| GO:0009755 | hormone-mediated signaling pathway                 | Adipor2, Esr2, Ghr, Nr6a1, Ppara, Rorc                                                                                                                                                                                                      | mmu-let-7a, mmu-let-7b, mmu-let-7c, mmu-let-7e, mmu-let-7f, mmu-miR-98 |
| GO:0009792 | embryo development ending in birth or egg hatching | Acvr1b, Acvr1c, Acvr2a, Apba1, Bcl2l1, Dlc1, Edn1, Esrrb, Etnk2, Gabpa, Grin2b, Hand1, Hoxd1, Il10, Mdfi, Mll2, Mycn, Pbx1, Pdgfb, Prdm1, Prrx1, Rcn1, Rdh10, Sall4, Sema4c, Skil, Slc30a1, Tead4, Tgfbr1, Tgfbr3, Tsc1, Wnt1, Wnt9a, Wnt9b | mmu-let-7a, mmu-let-7b, mmu-let-7c, mmu-let-7e, mmu-let-7f, mmu-miR-98 |
| GO:0009798 | axis specification                                 | Frs2, Mdfi, Senp2, Tcf7l1, Wnt1, Wnt9a, Wnt9b                                                                                                                                                                                               | mmu-let-7a, mmu-let-7b, mmu-let-7c, mmu-let-7e, mmu-let-7f, mmu-miR-98 |
| GO:0009896 | positive regulation of catabolic process           | Atg4b, Egl2, Insr, Prkaa2, Tnfrsf11b, Trib1, Trib2                                                                                                                                                                                          | mmu-let-7a, mmu-let-7b, mmu-let-7c, mmu-let-7e, mmu-let-7f, mmu-miR-98 |
| GO:0009968 | negative regulation of signal transduction         | Adrb2, Bcl2l1, Ccnd1, Cdc34, Dkk3, Dlc1, Dusp1, Dusp16, Dusp4, Esr2, Ezh2, Hic1, Hmga2, Igf1r, Mdfi, Nlk, Nlrc5, Nphp3, Peg10, Prkaa2, Rgs16, Skil, Socs1, Socs7, Spred3, Tgfbr3, Trim33, Tsc1, Wnt1                                        | mmu-let-7a, mmu-let-7b, mmu-let-7c, mmu-let-7e, mmu-let-7f, mmu-miR-98 |
| GO:0009987 | cellular process                                   | Btbd9, Cap2, Cdh22, Col14a1, Col15a1, Col4a5, Dlgap4, Dzip1, Fndc3a, Fras1, Frem2, Frmd4b, Kif21b, Nid2, Pappa, Pcdh20, Pla2g3, Rab11fip2, Sdk1, Sema4g, Slc8a2, Snx30, Spnb4, Strbp, Tmed5                                                 | mmu-let-7a, mmu-let-7b, mmu-let-7c, mmu-let-7e, mmu-let-7f, mmu-miR-98 |
| GO:0010463 | mesenchymal cell proliferation                     | Fgf4, Foxp2, Mycn, Prrx1                                                                                                                                                                                                                    | mmu-let-7a, mmu-let-7b, mmu-let-7c, mmu-let-7e, mmu-let-7f, mmu-miR-98 |
| GO:0010468 | regulation of gene expression                      | Apba1, Clp1, Dnajc1, Eif2c4, Eif4g2, Fgf5, Gipc1, Igf2bp2, Igf2bp3, Masp1, Rbm38, Syncrip, Tarbp2, Thbs1, Tia1, Tnfrsf1b, Tob2, Tsc1                                                                                                        | mmu-let-7a, mmu-let-7b, mmu-let-7c, mmu-let-7e, mmu-let-7f, mmu-miR-98 |
| GO:0010498 | proteasomal protein catabolic process              | Cdc34, Dlgap1, Dnajb9, Edem1, Edem3, Gipc1, Trib1, Trib2, Yod1                                                                                                                                                                              | mmu-let-7a, mmu-let-7b, mmu-let-7c, mmu-let-7e, mmu-let-7f, mmu-miR-98 |

|            |                                                                                  |                                                                                                       |                                                                        |
|------------|----------------------------------------------------------------------------------|-------------------------------------------------------------------------------------------------------|------------------------------------------------------------------------|
| GO:0010506 | regulation of autophagy                                                          | Prkaa2, Tnfaip3, Ulk2                                                                                 | mmu-let-7a, mmu-let-7b, mmu-let-7c, mmu-let-7e, mmu-let-7f, mmu-miR-98 |
| GO:0010560 | positive regulation of glycoprotein biosynthetic process                         | Ccr7, Insr                                                                                            | mmu-let-7a, mmu-let-7b, mmu-let-7c, mmu-let-7e, mmu-let-7f, mmu-miR-98 |
| GO:0010578 | regulation of adenylate cyclase activity involved in G-protein signaling pathway | Adrb2, Adrb3, Gnal, Htr4                                                                              | mmu-let-7a, mmu-let-7b, mmu-let-7c, mmu-let-7e, mmu-let-7f, mmu-miR-98 |
| GO:0010587 | miRNA catabolic process                                                          | Lin28a, Lin28b                                                                                        | mmu-let-7a, mmu-let-7b, mmu-let-7c, mmu-let-7e, mmu-let-7f, mmu-miR-98 |
| GO:0010604 | positive regulation of macromolecule metabolic process                           | Acvr2a, Atg4b, Ccnd1, Ccnd2, Dlc1, Egl2, Ghr, Il13, Pak1, Rictor, Senp2, Taok1, Tnfaip3, Trib1, Trib2 | mmu-let-7a, mmu-let-7b, mmu-let-7c, mmu-let-7e, mmu-let-7f, mmu-miR-98 |
| GO:0010613 | positive regulation of cardiac muscle hypertrophy                                | Edn1, Mtpn                                                                                            | mmu-let-7a, mmu-let-7b, mmu-let-7c, mmu-let-7e, mmu-let-7f, mmu-miR-98 |
| GO:0010721 | negative regulation of cell development                                          | Epha4, Hmga2, Lin28a, Lingo1, Mycn, Ntn1, Rufy3, Sema4f, Tgfbr3, Ulk2                                 | mmu-let-7a, mmu-let-7b, mmu-let-7c, mmu-let-7e, mmu-let-7f, mmu-miR-98 |
| GO:0010745 | negative regulation of macrophage derived foam cell differentiation              | Abcg1, Ppara                                                                                          | mmu-let-7a, mmu-let-7b, mmu-let-7c, mmu-let-7e, mmu-let-7f, mmu-miR-98 |
| GO:0010751 | negative regulation of nitric oxide mediated signal transduction                 | Thbs1                                                                                                 | mmu-let-7a, mmu-let-7b, mmu-let-7c, mmu-let-7e, mmu-let-7f, mmu-miR-98 |

|            |                                                                        |                                                                                                                                                                                   |                                                                        |
|------------|------------------------------------------------------------------------|-----------------------------------------------------------------------------------------------------------------------------------------------------------------------------------|------------------------------------------------------------------------|
| GO:0010754 | negative regulation of cGMP-mediated signaling                         | Thbs1                                                                                                                                                                             | mmu-let-7a, mmu-let-7b, mmu-let-7c, mmu-let-7e, mmu-let-7f, mmu-miR-98 |
| GO:0010769 | regulation of cell morphogenesis involved in differentiation           | Epha4, Nefm, Ngf, Ntn1, Rufy3, Sema4f, Skil, Tgfbr3, Tnik, Ulk2, Wnt9b                                                                                                            | mmu-let-7a, mmu-let-7b, mmu-let-7c, mmu-let-7e, mmu-let-7f, mmu-miR-98 |
| GO:0010793 | regulation of mRNA export from nucleus                                 | Zc3h3                                                                                                                                                                             | mmu-let-7a, mmu-let-7b, mmu-let-7c, mmu-let-7e, mmu-let-7f, mmu-miR-98 |
| GO:0010811 | positive regulation of cell-substrate adhesion                         | Dmp1, Ppm1f, Thbs1, Tsc1, Utrn                                                                                                                                                    | mmu-let-7a, mmu-let-7b, mmu-let-7c, mmu-let-7e, mmu-let-7f, mmu-miR-98 |
| GO:0010862 | positive regulation of pathway-restricted SMAD protein phosphorylation | Acvr1b, Gdf6, Tgfbr1                                                                                                                                                              | mmu-let-7a, mmu-let-7b, mmu-let-7c, mmu-let-7e, mmu-let-7f, mmu-miR-98 |
| GO:0010886 | positive regulation of cholesterol storage                             | Msr1, Srebf2                                                                                                                                                                      | mmu-let-7a, mmu-let-7b, mmu-let-7c, mmu-let-7e, mmu-let-7f, mmu-miR-98 |
| GO:0010888 | negative regulation of lipid storage                                   | Abcg1, Ppara                                                                                                                                                                      | mmu-let-7a, mmu-let-7b, mmu-let-7c, mmu-let-7e, mmu-let-7f, mmu-miR-98 |
| GO:0010921 | regulation of phosphatase activity                                     | Akap6, Farp1, Gpatch2, Ppargc1b, Slc7a14, Tsc1                                                                                                                                    | mmu-let-7a, mmu-let-7b, mmu-let-7c, mmu-let-7e, mmu-let-7f, mmu-miR-98 |
| GO:0010941 | regulation of cell death                                               | Abcb9, Acvr1b, Acvr1c, Adrb2, Aen, Dcun1d3, Ddx19a, Dlc1, EglN2, Ercc6, Fasl, Fnip2, Ghr, Grin2b, Hic1, Hip1, Ikbke, Ing3, Map3k1, Mycn, Plagl2, Ppara, Skil, Tbx5, Thoc1, Zbtb16 | mmu-let-7a, mmu-let-7b, mmu-let-7c, mmu-let-7e, mmu-let-7f, mmu-miR-98 |
| GO:0014013 | regulation of gliogenesis                                              | Epha4, Ezh2, Hmga2, Lin28a, Lingo1, Mycn                                                                                                                                          | mmu-let-7a, mmu-let-7b, mmu-let-7c, mmu-let-7e, mmu-let-7f, mmu-miR-98 |

|            |                                        |                                                                                                                                                                                                                                                                 |                                                                        |
|------------|----------------------------------------|-----------------------------------------------------------------------------------------------------------------------------------------------------------------------------------------------------------------------------------------------------------------|------------------------------------------------------------------------|
| GO:0014031 | mesenchymal cell development           | Edn1, Hmga2, Nrtn, Rbpj, Rdh10, Tgfbr1, Tgfbr3                                                                                                                                                                                                                  | mmu-let-7a, mmu-let-7b, mmu-let-7c, mmu-let-7e, mmu-let-7f, mmu-miR-98 |
| GO:0014047 | glutamate secretion                    | Apba1, Gipc1, Grin2b                                                                                                                                                                                                                                            | mmu-let-7a, mmu-let-7b, mmu-let-7c, mmu-let-7e, mmu-let-7f, mmu-miR-98 |
| GO:0014051 | gamma-aminobutyric acid secretion      | Apba1, Slc6a1                                                                                                                                                                                                                                                   | mmu-let-7a, mmu-let-7b, mmu-let-7c, mmu-let-7e, mmu-let-7f, mmu-miR-98 |
| GO:0014074 | response to purine-containing compound | Slc6a1                                                                                                                                                                                                                                                          | mmu-let-7a, mmu-let-7b, mmu-let-7c, mmu-let-7e, mmu-let-7f, mmu-miR-98 |
| GO:0015701 | bicarbonate transport                  | Slc26a9, Slc4a4                                                                                                                                                                                                                                                 | mmu-let-7a, mmu-let-7b, mmu-let-7c, mmu-let-7e, mmu-let-7f, mmu-miR-98 |
| GO:0015878 | biotin transport                       | Slc5a6                                                                                                                                                                                                                                                          | mmu-let-7a, mmu-let-7b, mmu-let-7c, mmu-let-7e, mmu-let-7f, mmu-miR-98 |
| GO:0015887 | pantothenate transmembrane transport   | Slc5a6                                                                                                                                                                                                                                                          | mmu-let-7a, mmu-let-7b, mmu-let-7c, mmu-let-7e, mmu-let-7f, mmu-miR-98 |
| GO:0016032 | viral reproduction                     | Bcl2l1, Hmga2, Insr, Map3k1, Tarbp2, Thoc1, Thoc2                                                                                                                                                                                                               | mmu-let-7a, mmu-let-7b, mmu-let-7c, mmu-let-7e, mmu-let-7f, mmu-miR-98 |
| GO:0016043 | cellular component organization        | Abcg1, Acvr1b, Adipor2, Adrb2, Ankfy1, Ap1s1, Aqp4, Braf, C230081A13Rik, Col4a1, Col4a5, Dcun1d3, Ercc6, Esrrb, Gabra6, Ghr, Grik2, Grin2b, Msr1, Nphp3, Olr1, P2rx1, Pacs2, Rbpj, Reep1, Rrm2, Slc6a1, Snap23, Snx5, Taf9b, Thbs1, Tmprss2, Usp47, Utrn, Wnt9b | mmu-let-7a, mmu-let-7b, mmu-let-7c, mmu-let-7e, mmu-let-7f, mmu-miR-98 |

|            |                                    |                                                                                                                                                                                                                                |                                                                        |
|------------|------------------------------------|--------------------------------------------------------------------------------------------------------------------------------------------------------------------------------------------------------------------------------|------------------------------------------------------------------------|
| GO:0016044 | cellular membrane organization     | Adrb2, Ankfy1, Ap1s1, Bcl2l1, Cap1, Casp3, Ccr7, Eea1, Ghr, Grik2, Grin2b, Hip1, Msr1, Olr1, Pacs2, Pak1, Pldn, Reep1, Sec16b, Smcr7l, Snap23, Snx5, Stx3, Thbs1, Tmprss2, Vav3                                                | mmu-let-7a, mmu-let-7b, mmu-let-7c, mmu-let-7e, mmu-let-7f, mmu-miR-98 |
| GO:0016049 | cell growth                        | Acvr1b, Adipor2, Bin3, Dcun1d3, Edn1, Il6, Lmx1a, Mll2, Nme6, Sema4f, Tgfbr3, Ulk2                                                                                                                                             | mmu-let-7a, mmu-let-7b, mmu-let-7c, mmu-let-7e, mmu-let-7f, mmu-miR-98 |
| GO:0016192 | vesicle-mediated transport         | 1500003O03Rik, Adrb2, Ankfy1, Ap1s1, Bcap29, Cap1, Ccr7, Ergic1, Gga3, Ghr, Golga7, Golt1b, Hip1, Hook1, Msr1, Myo1f, Olr1, P2rx1, Rab6b, Ralb, Sec16b, Snap23, Snx16, Snx5, Stx17, Stx3, Syt1, Thbs1, Tmprss2, Trappc1, Txlna | mmu-let-7a, mmu-let-7b, mmu-let-7c, mmu-let-7e, mmu-let-7f, mmu-miR-98 |
| GO:0016441 | posttranscriptional gene silencing | Clp1, Eif2c4, Limd1, Lin28a, Lin28b, Tarbp2                                                                                                                                                                                    | mmu-let-7a, mmu-let-7b, mmu-let-7c, mmu-let-7e, mmu-let-7f, mmu-miR-98 |
| GO:0018022 | peptidyl-lysine methylation        | Ezh2, Mll2, Suv39h2                                                                                                                                                                                                            | mmu-let-7a, mmu-let-7b, mmu-let-7c, mmu-let-7e, mmu-let-7f, mmu-miR-98 |
| GO:0018105 | peptidyl-serine phosphorylation    | Braf, Hmga2, Il6, Map3k1, Mapk8, Nlk, Pak1, Pdgfb, Ppm1f, Prkaa2, Sbk1, Tgfbr1                                                                                                                                                 | mmu-let-7a, mmu-let-7b, mmu-let-7c, mmu-let-7e, mmu-let-7f, mmu-miR-98 |
| GO:0018107 | peptidyl-threonine phosphorylation | Acvr1b, Mapk8, Nlk, Sbk1, Tgfbr1                                                                                                                                                                                               | mmu-let-7a, mmu-let-7b, mmu-let-7c, mmu-let-7e, mmu-let-7f, mmu-miR-98 |
| GO:0018149 | peptide cross-linking              | Col3a1, Lor, Thbs1                                                                                                                                                                                                             | mmu-let-7a, mmu-let-7b, mmu-let-7c, mmu-let-7e, mmu-let-7f, mmu-miR-98 |
| GO:0018193 | peptidyl-amino acid modification   | Acvr1b, Braf, Dyrk1a, Epha4, Ezh2, Galnt1, Galnt2, Ghr, Hif1an, Hmga2, Il13, Il6, Ing3, Insr, Map3k1, Mapk8, Mll2, Nlk, P4ha2, Pak1, Pdgfb, Ppm1f, Prkaa2, Rictor, Sbk1, Socs1, Suv39h2, Tgfbr1, Ttl4                          | mmu-let-7a, mmu-let-7b, mmu-let-7c, mmu-let-7e, mmu-let-7f, mmu-miR-98 |

|            |                                              |                                                                                                                                                                                                                                                 |                                                                        |
|------------|----------------------------------------------|-------------------------------------------------------------------------------------------------------------------------------------------------------------------------------------------------------------------------------------------------|------------------------------------------------------------------------|
| GO:0018242 | protein O-linked glycosylation via serine    | Galnt1, Galnt2                                                                                                                                                                                                                                  | mmu-let-7a, mmu-let-7b, mmu-let-7c, mmu-let-7e, mmu-let-7f, mmu-miR-98 |
| GO:0018243 | protein O-linked glycosylation via threonine | Galnt1, Galnt2                                                                                                                                                                                                                                  | mmu-let-7a, mmu-let-7b, mmu-let-7c, mmu-let-7e, mmu-let-7f, mmu-miR-98 |
| GO:0019080 | viral genome expression                      | Hmga2, Map3k1, Tarbp2                                                                                                                                                                                                                           | mmu-let-7a, mmu-let-7b, mmu-let-7c, mmu-let-7e, mmu-let-7f, mmu-miR-98 |
| GO:0019216 | regulation of lipid metabolic process        | Abcg1, Dkk3, Igf1r, Pdgfb, Ppara, Ppargc1a, Prkaa2, Rb1, Thrsp, Vav3                                                                                                                                                                            | mmu-let-7a, mmu-let-7b, mmu-let-7c, mmu-let-7e, mmu-let-7f, mmu-miR-98 |
| GO:0019220 | regulation of phosphate metabolic process    | Akap6, Casp3, Ccny, Ccr7, Dusp1, Dusp16, Dusp4, Edn1, Eph4, Ercc6, Ezh2, Farp1, Fnip1, Fnip2, Frs2, Gpatch2, Igf1r, Ikbkap, Map3k1, Mdfi, Nlrc5, Ppm1f, Prlr, Rb1, Slc7a14, Socs1, Spred3, Tab2, Tnfaip3, Tnik, Trib1, Trib2, Tsc1, Vav3, Wnt9b | mmu-let-7a, mmu-let-7b, mmu-let-7c, mmu-let-7e, mmu-let-7f, mmu-miR-98 |
| GO:0019226 | transmission of nerve impulse                | Adrb2, Apba1, Arhgef15, Dlgap1, Dmd, Edn1, Gabra6, Gipc1, Grin2b, Il6, Kcnc3, Kcnc4, Nat8l, Ngf, P2rx1, Scn8a, Slc30a1, Spnb4, Syt1, Tmod2, Tsc1                                                                                                | mmu-let-7a, mmu-let-7b, mmu-let-7c, mmu-let-7e, mmu-let-7f, mmu-miR-98 |
| GO:0019484 | beta-alanine catabolic process               | Aldh6a1                                                                                                                                                                                                                                         | mmu-let-7a, mmu-let-7b, mmu-let-7c, mmu-let-7e, mmu-let-7f, mmu-miR-98 |
| GO:0021549 | cerebellum development                       | Ezh2, Foxp2, Lmx1a, Sema4c, Wnt1                                                                                                                                                                                                                | mmu-let-7a, mmu-let-7b, mmu-let-7c, mmu-let-7e, mmu-let-7f, mmu-miR-98 |
| GO:0021588 | cerebellum formation                         | Wnt1                                                                                                                                                                                                                                            | mmu-let-7a, mmu-let-7b, mmu-let-7c, mmu-let-7e, mmu-let-7f, mmu-miR-98 |
| GO:0021629 | olfactory nerve structural organization      | Dmd                                                                                                                                                                                                                                             | mmu-let-7a, mmu-let-7b, mmu-let-7c, mmu-let-7e, mmu-let-7f, mmu-miR-98 |

|            |                                                                         |                                                                                                                                                                                                                                                     |                                                                        |
|------------|-------------------------------------------------------------------------|-----------------------------------------------------------------------------------------------------------------------------------------------------------------------------------------------------------------------------------------------------|------------------------------------------------------------------------|
| GO:0021757 | caudate nucleus development                                             | Foxp2                                                                                                                                                                                                                                               | mmu-let-7a, mmu-let-7b, mmu-let-7c, mmu-let-7e, mmu-let-7f, mmu-miR-98 |
| GO:0021758 | putamen development                                                     | Foxp2                                                                                                                                                                                                                                               | mmu-let-7a, mmu-let-7b, mmu-let-7c, mmu-let-7e, mmu-let-7f, mmu-miR-98 |
| GO:0021919 | BMP signaling pathway involved in spinal cord dorsal/ventral patterning | Chrd                                                                                                                                                                                                                                                | mmu-let-7a, mmu-let-7b, mmu-let-7c, mmu-let-7e, mmu-let-7f, mmu-miR-98 |
| GO:0022004 | midbrain-hindbrain boundary maturation during brain development         | Wnt1                                                                                                                                                                                                                                                | mmu-let-7a, mmu-let-7b, mmu-let-7c, mmu-let-7e, mmu-let-7f, mmu-miR-98 |
| GO:0022603 | regulation of anatomical structure morphogenesis                        | Brwd1, Col4a2, Dlc1, Edn1, Epha4, Fasl, Foxp2, Frs2, Gas7, Gtf2i, Il6, Lgr4, Limd1, Nefm, Ngf, Ntn1, Plxnd1, Rufy3, Sema4f, Skil, Tgfbr3, Thbs1, Tnfaip3, Tnik, Ulk2, Vash2, Wnt9b                                                                  | mmu-let-7a, mmu-let-7b, mmu-let-7c, mmu-let-7e, mmu-let-7f, mmu-miR-98 |
| GO:0022610 | biological adhesion                                                     | Acer2, Btbd9, C230081A13Rik, Cask, Cdh22, Cercam, Chrd, Col14a1, Col15a1, Col3a1, Dlc1, Dmp1, Eda, Epha3, Epha4, Fgf4, Fndc3a, Frem2, Lmln, Mycn, Myo1f, Nid2, Ntn1, Olr1, Pcdh20, Ppm1f, Prlr, Ptpru, Sdk1, Thbs1, Tnfaip3, Tsc1, Utrn, Vav3, Wnt1 | mmu-let-7a, mmu-let-7b, mmu-let-7c, mmu-let-7e, mmu-let-7f, mmu-miR-98 |
| GO:0022612 | gland morphogenesis                                                     | Eda, Esr2, Frs2, Igf1r, Il6, Ntn1, Pdgfb, Plxnd1                                                                                                                                                                                                    | mmu-let-7a, mmu-let-7b, mmu-let-7c, mmu-let-7e, mmu-let-7f, mmu-miR-98 |
| GO:0023014 | signal transduction by phosphorylation                                  | Acvr1b, Insr                                                                                                                                                                                                                                        | mmu-let-7a, mmu-let-7b, mmu-let-7c, mmu-let-7e, mmu-let-7f, mmu-miR-98 |



|            |                                              |                                                                                                                                                                                                                |                                                                        |
|------------|----------------------------------------------|----------------------------------------------------------------------------------------------------------------------------------------------------------------------------------------------------------------|------------------------------------------------------------------------|
| GO:0030029 | actin filament-based process                 | Acta1, Cap1, Ccr7, Crk, Dlc1, Edn1, Epha3, Gas7, Grid2ip, Map3k1, Myo1f, Pak1, Pdgfb, Ppargc1b, Ppm1f, Rdx, Rictor, Tnik, Tsc1, Wasl                                                                           | mmu-let-7a, mmu-let-7b, mmu-let-7c, mmu-let-7e, mmu-let-7f, mmu-miR-98 |
| GO:0030111 | regulation of Wnt receptor signaling pathway | Ccnd1, Ccny, Dkk3, Eda, Hic1, Mdfi, Nlk, Nphp3, Rspo2                                                                                                                                                          | mmu-let-7a, mmu-let-7b, mmu-let-7c, mmu-let-7e, mmu-let-7f, mmu-miR-98 |
| GO:0030163 | protein catabolic process                    | Cdc34, Dnajb9, Edem1, Edem3, Fbxl12, Fbxl14, Map3k1, Rnf20, Uhrf2, Usp12, Usp24, Usp38, Usp47, Yod1                                                                                                            | mmu-let-7a, mmu-let-7b, mmu-let-7c, mmu-let-7e, mmu-let-7f, mmu-miR-98 |
| GO:0030182 | neuron differentiation                       | Dmd, Epha3, Epha4, Gas7, Gdf6, Igf1r, Il6, Lin28a, Lingo1, Lmx1a, Mapk8, Nefm, Ngf, Nrtn, Ntn1, Pak1, Pbx1, Pbx3, Rb1, Rbpj, Ruffy3, Sall3, Sema4f, Skil, Slc4a7, Spnb4, Stx3, Tgfbr1, Tnik, Ulk2, Unc5a, Wnt1 | mmu-let-7a, mmu-let-7b, mmu-let-7c, mmu-let-7e, mmu-let-7f, mmu-miR-98 |
| GO:0030195 | negative regulation of blood coagulation     | Klkb1, Pdgfb, Thbs1                                                                                                                                                                                            | mmu-let-7a, mmu-let-7b, mmu-let-7c, mmu-let-7e, mmu-let-7f, mmu-miR-98 |
| GO:0030199 | collagen fibril organization                 | Adamts14, Col1a2, Col3a1, Col5a2, Tgfbr1                                                                                                                                                                       | mmu-let-7a, mmu-let-7b, mmu-let-7c, mmu-let-7e, mmu-let-7f, mmu-miR-98 |
| GO:0030238 | male sex determination                       | Igf1r, Insr                                                                                                                                                                                                    | mmu-let-7a, mmu-let-7b, mmu-let-7c, mmu-let-7e, mmu-let-7f, mmu-miR-98 |
| GO:0030307 | positive regulation of cell growth           | Mtpn, Ngf, Ntn1, Taf9b, Tgfbr1, Usp47                                                                                                                                                                          | mmu-let-7a, mmu-let-7b, mmu-let-7c, mmu-let-7e, mmu-let-7f, mmu-miR-98 |
| GO:0030326 | embryonic limb morphogenesis                 | Fgf4, Mycn, Pbx1, Pbx2, Prrx1, Rdh10, Rspo2, Sall4, Tbx5, Wnt9a, Zbtb16                                                                                                                                        | mmu-let-7a, mmu-let-7b, mmu-let-7c, mmu-let-7e, mmu-let-7f, mmu-miR-98 |
| GO:0030336 | negative regulation of cell migration        | Chrd, Dlc1, Pdgfb, Ptpru, Rnf20, Tbx5, Tgfbr3, Thbs1, Trib1                                                                                                                                                    | mmu-let-7a, mmu-let-7b, mmu-let-7c, mmu-let-7e, mmu-let-7f, mmu-miR-98 |

|            |                                                                                   |                                                         |                                                                        |
|------------|-----------------------------------------------------------------------------------|---------------------------------------------------------|------------------------------------------------------------------------|
| GO:0030423 | targeting of mRNA for destruction involved in RNA interference                    | Clp1, Tarbp2                                            | mmu-let-7a, mmu-let-7b, mmu-let-7c, mmu-let-7e, mmu-let-7f, mmu-miR-98 |
| GO:0030433 | ER-associated protein catabolic process                                           | Dnajb9, Edem1, Yod1                                     | mmu-let-7a, mmu-let-7b, mmu-let-7c, mmu-let-7e, mmu-let-7f, mmu-miR-98 |
| GO:0030501 | positive regulation of bone mineralization                                        | Acvr2a, Adrb2, Cd276                                    | mmu-let-7a, mmu-let-7b, mmu-let-7c, mmu-let-7e, mmu-let-7f, mmu-miR-98 |
| GO:0030511 | positive regulation of transforming growth factor beta receptor signaling pathway | Gipc1, Tgfbr3, Thbs1                                    | mmu-let-7a, mmu-let-7b, mmu-let-7c, mmu-let-7e, mmu-let-7f, mmu-miR-98 |
| GO:0030512 | negative regulation of transforming growth factor beta receptor signaling pathway | Peg10, Skil, Tgfbr3, Wnt1                               | mmu-let-7a, mmu-let-7b, mmu-let-7c, mmu-let-7e, mmu-let-7f, mmu-miR-98 |
| GO:0030522 | intracellular receptor mediated signaling pathway                                 | Esr2, Ezh2, Hmga2, Mll2, Pak1, Ppara, Ppargc1b, Tnfaip3 | mmu-let-7a, mmu-let-7b, mmu-let-7c, mmu-let-7e, mmu-let-7f, mmu-miR-98 |
| GO:0030886 | negative regulation of myeloid dendritic cell activation                          | Il10                                                    | mmu-let-7a, mmu-let-7b, mmu-let-7c, mmu-let-7e, mmu-let-7f, mmu-miR-98 |
| GO:0030889 | negative regulation of B cell proliferation                                       | Casp3, Il10, Prdm1                                      | mmu-let-7a, mmu-let-7b, mmu-let-7c, mmu-let-7e, mmu-let-7f, mmu-miR-98 |
| GO:0030902 | hindbrain development                                                             | Dlc1, Ezh2, Foxp2, Lmx1a, Sema4c, Slc4a7, Wnt1          | mmu-let-7a, mmu-let-7b, mmu-let-7c, mmu-let-7e, mmu-let-7f, mmu-miR-98 |

|            |                                                 |                                                                                                                                                           |                                                                        |
|------------|-------------------------------------------------|-----------------------------------------------------------------------------------------------------------------------------------------------------------|------------------------------------------------------------------------|
| GO:0030968 | endoplasmic reticulum unfolded protein response | Ccnd1, Ero1l, Yod1                                                                                                                                        | mmu-let-7a, mmu-let-7b, mmu-let-7c, mmu-let-7e, mmu-let-7f, mmu-miR-98 |
| GO:0031000 | response to caffeine                            | Gnal, Prkaa2                                                                                                                                              | mmu-let-7a, mmu-let-7b, mmu-let-7c, mmu-let-7e, mmu-let-7f, mmu-miR-98 |
| GO:0031017 | exocrine pancreas development                   | Igf1r, Insr                                                                                                                                               | mmu-let-7a, mmu-let-7b, mmu-let-7c, mmu-let-7e, mmu-let-7f, mmu-miR-98 |
| GO:0031052 | chromosome breakage                             | Hmga2                                                                                                                                                     | mmu-let-7a, mmu-let-7b, mmu-let-7c, mmu-let-7e, mmu-let-7f, mmu-miR-98 |
| GO:0031054 | pre-miRNA processing                            | Lin28a, Lin28b, Tarbp2                                                                                                                                    | mmu-let-7a, mmu-let-7b, mmu-let-7c, mmu-let-7e, mmu-let-7f, mmu-miR-98 |
| GO:0031123 | RNA 3'-end processing                           | Lin28a, Lin28b, Lsm11, Zc3h3                                                                                                                              | mmu-let-7a, mmu-let-7b, mmu-let-7c, mmu-let-7e, mmu-let-7f, mmu-miR-98 |
| GO:0031175 | neuron projection development                   | Dmd, Epha3, Epha4, Gas7, Igf1r, Il6, Lingo1, Lmx1a, Mapk8, Nefm, Ngf, Nrtn, Ntn1, Pak1, Rb1, Rufy3, Sema4f, Skil, Spnb4, Stx3, Tnik, Ulk2, Unc5a          | mmu-let-7a, mmu-let-7b, mmu-let-7c, mmu-let-7e, mmu-let-7f, mmu-miR-98 |
| GO:0031329 | regulation of cellular catabolic process        | Arhgap20, Arhgap28, Arhgef15, Ccr7, Crk, Dlc1, Dlgap1, Epha3, Epha4, Gipc1, Il10, Plekhg6, Rgs16, Rictor, Srgap3, Stard13, Trib1, Trib2, Tsc1, Vav3, Wnt1 | mmu-let-7a, mmu-let-7b, mmu-let-7c, mmu-let-7e, mmu-let-7f, mmu-miR-98 |
| GO:0031344 | regulation of cell projection organization      | Ccr7, Epha3, Epha4, Nefm, Ngf, Ntn1, Rab8b, Rufy3, Sema4f, Skil, Tgfbr1, Tnik, Ulk2, Wnt1                                                                 | mmu-let-7a, mmu-let-7b, mmu-let-7c, mmu-let-7e, mmu-let-7f, mmu-miR-98 |

|            |                                                                      |                                                                                                        |                                                                        |
|------------|----------------------------------------------------------------------|--------------------------------------------------------------------------------------------------------|------------------------------------------------------------------------|
| GO:0031347 | regulation of defense response                                       | Adrb2, Ccr7, Cd276, Cd86, Il10, Il6, Masp1, Mgl1, Myo1f, Nlrc5, Polr3d, Tarbp2, Tnfaip3, Tnfrsf1b      | mmu-let-7a, mmu-let-7b, mmu-let-7c, mmu-let-7e, mmu-let-7f, mmu-miR-98 |
| GO:0031397 | negative regulation of protein ubiquitination                        | 1810074P20Rik, Tnfaip3, Wnt1                                                                           | mmu-let-7a, mmu-let-7b, mmu-let-7c, mmu-let-7e, mmu-let-7f, mmu-miR-98 |
| GO:0031570 | DNA integrity checkpoint                                             | Bcat1, Ccnd1, Hmga2, Rbm38, Taok1, Wnt1                                                                | mmu-let-7a, mmu-let-7b, mmu-let-7c, mmu-let-7e, mmu-let-7f, mmu-miR-98 |
| GO:0031571 | mitotic cell cycle G1/S transition DNA damage checkpoint             | Bcat1, Ccnd1, Rbm38                                                                                    | mmu-let-7a, mmu-let-7b, mmu-let-7c, mmu-let-7e, mmu-let-7f, mmu-miR-98 |
| GO:0031589 | cell-substrate adhesion                                              | Acer2, C230081A13Rik, Cask, Col3a1, Dlc1, Eda, Epha3, Nid2, Wnt1                                       | mmu-let-7a, mmu-let-7b, mmu-let-7c, mmu-let-7e, mmu-let-7f, mmu-miR-98 |
| GO:0031644 | regulation of neurological system process                            | Adrb2, Edn1, Gipc1, Grid2ip, Grik2, Grin2b, Il10, Il6, Kcnc3, Kcnc4, Mgl1, Nat8l, Ngf, Slc30a1, Slc6a1 | mmu-let-7a, mmu-let-7b, mmu-let-7c, mmu-let-7e, mmu-let-7f, mmu-miR-98 |
| GO:0031665 | negative regulation of lipopolysaccharide-mediated signaling pathway | Prdm1, Trib1                                                                                           | mmu-let-7a, mmu-let-7b, mmu-let-7c, mmu-let-7e, mmu-let-7f, mmu-miR-98 |
| GO:0031954 | positive regulation of protein autophosphorylation                   | Ngf, Pdgfb                                                                                             | mmu-let-7a, mmu-let-7b, mmu-let-7c, mmu-let-7e, mmu-let-7f, mmu-miR-98 |
| GO:0032006 | regulation of TOR signaling cascade                                  | Prkaa2, Rictor, Tsc1                                                                                   | mmu-let-7a, mmu-let-7b, mmu-let-7c, mmu-let-7e, mmu-let-7f, mmu-miR-98 |
| GO:0032091 | negative regulation of protein binding                               | Adrb2, Mapk8, Ppara, Senp2                                                                             | mmu-let-7a, mmu-let-7b, mmu-let-7c, mmu-let-7e, mmu-let-7f, mmu-miR-98 |

|            |                                                             |                                                                                                                                                                |                                                                        |
|------------|-------------------------------------------------------------|----------------------------------------------------------------------------------------------------------------------------------------------------------------|------------------------------------------------------------------------|
| GO:0032101 | regulation of response to external stimulus                 | Adrb2, Cask, Ccr7, Cd276, Edn1, Epha4, Il10, Il6, Klkb1, Masp1, Mgl1, Pdgfb, Ppara, Ppm1f, Thbs1, Tnfaip3, Tnfrsf1b                                            | mmu-let-7a, mmu-let-7b, mmu-let-7c, mmu-let-7e, mmu-let-7f, mmu-miR-98 |
| GO:0032147 | activation of protein kinase activity                       | Braf, Ccr7, Edn1, Ercc6, Frs2, Ghr, Insr, Map3k1, Mdfi, Pdgfb, Prlr, Tgfbr1, Thbs1, Tnik                                                                       | mmu-let-7a, mmu-let-7b, mmu-let-7c, mmu-let-7e, mmu-let-7f, mmu-miR-98 |
| GO:0032268 | regulation of cellular protein metabolic process            | Casp3, Ccny, Ccr7, Dlgap1, Dusp1, Dusp16, Dusp4, Epha4, Ercc6, Ezh2, Fnip1, Fnip2, Frs2, Igf1r, Map3k1, Mapk8, Mdfi, Prlr, Rb1, Spred3, Tab2, Tnik, Wnt9b      | mmu-let-7a, mmu-let-7b, mmu-let-7c, mmu-let-7e, mmu-let-7f, mmu-miR-98 |
| GO:0032269 | negative regulation of cellular protein metabolic process   | 1810074P20Rik, Acer2, Edn1, Eif2c4, Gipc1, Il10, Insr, Ppm1f, Socs1, Tia1, Tnfaip3, Tsc1, Wnt1                                                                 | mmu-let-7a, mmu-let-7b, mmu-let-7c, mmu-let-7e, mmu-let-7f, mmu-miR-98 |
| GO:0032270 | positive regulation of cellular protein metabolic process   | Acvr1b, Acvr2a, Braf, Ccnd1, Ccnd2, Dlc1, Gdf6, Ghr, Il13, Il6, Insr, Lin28a, Ngf, Pak1, Pdgfb, Rictor, Senp2, Taok1, Tgfbr1, Thbs1, Trib1, Trib2, Wnt1        | mmu-let-7a, mmu-let-7b, mmu-let-7c, mmu-let-7e, mmu-let-7f, mmu-miR-98 |
| GO:0032319 | regulation of Rho GTPase activity                           | Ccr7, Crk, Dlc1, Epha3, Epha4, Rictor, Tsc1                                                                                                                    | mmu-let-7a, mmu-let-7b, mmu-let-7c, mmu-let-7e, mmu-let-7f, mmu-miR-98 |
| GO:0032502 | developmental process                                       | Adrb3, Aldh6a1, Brwd1, C230081A13Rik, Cap1, Cap2, Ero1l, Gnptab, Hip1, Limd1, Pappa, Pla2g3, Pldn, Ptpru, Rasgrp1, Socs1, Socs7, Speg, Suv39h2, Tmem231, Uhrf2 | mmu-let-7a, mmu-let-7b, mmu-let-7c, mmu-let-7e, mmu-let-7f, mmu-miR-98 |
| GO:0032504 | multicellular organism reproduction                         | Acvr2a, Agpat6, Bcl2l1, Ccnd1, Dzip1, Esr2, Fndc3a, Hmga1, Hmga2, Hook1, Limk2, Lin28a, Mll2, Nr6a1, P2rx1, Pcyt1b, Prdm1, Prlr, Strbp, Styx, Tgfbr1, Zbtb16   | mmu-let-7a, mmu-let-7b, mmu-let-7c, mmu-let-7e, mmu-let-7f, mmu-miR-98 |
| GO:0032514 | positive regulation of protein phosphatase type 2B activity | Akap6                                                                                                                                                          | mmu-let-7a, mmu-let-7b, mmu-let-7c, mmu-let-7e, mmu-let-7f, mmu-miR-98 |

|            |                                                                   |                                                                                                                                                                                       |                                                                        |
|------------|-------------------------------------------------------------------|---------------------------------------------------------------------------------------------------------------------------------------------------------------------------------------|------------------------------------------------------------------------|
| GO:0032535 | regulation of cellular component size                             | Edn1, Map3k1, Mtpn, Nefm, Ngf, Ntn1, Rdx, Rictor, Sema4f, Tsc1, Ulk2, Wasl                                                                                                            | mmu-let-7a, mmu-let-7b, mmu-let-7c, mmu-let-7e, mmu-let-7f, mmu-miR-98 |
| GO:0032695 | negative regulation of interleukin-12 production                  | Il10, Thbs1                                                                                                                                                                           | mmu-let-7a, mmu-let-7b, mmu-let-7c, mmu-let-7e, mmu-let-7f, mmu-miR-98 |
| GO:0032723 | positive regulation of connective tissue growth factor production | Il13                                                                                                                                                                                  | mmu-let-7a, mmu-let-7b, mmu-let-7c, mmu-let-7e, mmu-let-7f, mmu-miR-98 |
| GO:0032784 | regulation of transcription elongation, DNA-dependent             | Ercc6, Ezh2, Thoc1                                                                                                                                                                    | mmu-let-7a, mmu-let-7b, mmu-let-7c, mmu-let-7e, mmu-let-7f, mmu-miR-98 |
| GO:0032800 | receptor biosynthetic process                                     | Edn1, Il10, Ppara                                                                                                                                                                     | mmu-let-7a, mmu-let-7b, mmu-let-7c, mmu-let-7e, mmu-let-7f, mmu-miR-98 |
| GO:0032868 | response to insulin stimulus                                      | Acvr1c, Insr, Pak1, Ppara, Smarcc1, Socs1, Socs7, Tsc1                                                                                                                                | mmu-let-7a, mmu-let-7b, mmu-let-7c, mmu-let-7e, mmu-let-7f, mmu-miR-98 |
| GO:0032879 | regulation of localization                                        | Abi3, Bcl2l1, Cep120, Chrd, Dlc1, Igf1r, Map3k1, Mapk8, Msr1, Myo1f, Ntn1, Plxnd1, Ppm1f, Ptpru, Rb1, Rnf20, Tbx5, Tgfbr3, Trib1                                                      | mmu-let-7a, mmu-let-7b, mmu-let-7c, mmu-let-7e, mmu-let-7f, mmu-miR-98 |
| GO:0032927 | positive regulation of activin receptor signaling pathway         | Acvr1b, Acvr2a                                                                                                                                                                        | mmu-let-7a, mmu-let-7b, mmu-let-7c, mmu-let-7e, mmu-let-7f, mmu-miR-98 |
| GO:0032940 | secretion by cell                                                 | 1500003O03Rik, Acvr1c, Acvr2a, Ccr7, Dnajc1, Edn1, Gnptab, Hmga2, Il10, Il13, Il6, Kcnc3, Kcnc4, Myo1f, Ngf, P2rx1, Pldn, Rab8b, Ralb, Rbpj, Rfx6, Slc30a1, Snap23, Stx3, Syt1, Txlna | mmu-let-7a, mmu-let-7b, mmu-let-7c, mmu-let-7e, mmu-let-7f, mmu-miR-98 |

|            |                                                                          |                                                                                                                                       |                                                                        |
|------------|--------------------------------------------------------------------------|---------------------------------------------------------------------------------------------------------------------------------------|------------------------------------------------------------------------|
| GO:0032943 | mononuclear cell proliferation                                           | Casp3, Ccr7, Cd276, Cd86, Il10, Il13, Il6, Prdm1, Vav3, Elf4                                                                          | mmu-let-7a, mmu-let-7b, mmu-let-7c, mmu-let-7e, mmu-let-7f, mmu-miR-98 |
| GO:0032956 | regulation of actin cytoskeleton organization                            | Crk, Dlc1, Edn1, Epha3, Map3k1, Mtpn, Myo1f, Pak1, Ppm1f, Rdx, Rictor, Tsc1, Wasl                                                     | mmu-let-7a, mmu-let-7b, mmu-let-7c, mmu-let-7e, mmu-let-7f, mmu-miR-98 |
| GO:0033002 | muscle cell proliferation                                                | Edn1, Il13, Il6, Pdgfb, Tbx5, Tgfbr3, Tnfaip3, Trib1                                                                                  | mmu-let-7a, mmu-let-7b, mmu-let-7c, mmu-let-7e, mmu-let-7f, mmu-miR-98 |
| GO:0033043 | regulation of organelle organization                                     | Clasp2, Crk, Dlc1, Epha3, Map3k1, Mapk8, Mtpn, Myo1f, Pak1, Ppm1f, Rdx, Rictor, Taok1, Tsc1, Wasl, Ercc4                              | mmu-let-7a, mmu-let-7b, mmu-let-7c, mmu-let-7e, mmu-let-7f, mmu-miR-98 |
| GO:0033121 | regulation of purine nucleotide catabolic process                        | Arhgap20, Arhgap28, Arhgef15, Ccr7, Crk, Dlc1, Epha3, Epha4, Gipc1, Plekhg6, Rgs16, Rictor, Srgap3, Stard13, Tsc1, Vav3               | mmu-let-7a, mmu-let-7b, mmu-let-7c, mmu-let-7e, mmu-let-7f, mmu-miR-98 |
| GO:0033143 | regulation of intracellular steroid hormone receptor signaling pathway   | Esr2, Hmga2, Mll2, Pak1                                                                                                               | mmu-let-7a, mmu-let-7b, mmu-let-7c, mmu-let-7e, mmu-let-7f, mmu-miR-98 |
| GO:0033148 | positive regulation of intracellular estrogen receptor signaling pathway | Mll2, Pak1                                                                                                                            | mmu-let-7a, mmu-let-7b, mmu-let-7c, mmu-let-7e, mmu-let-7f, mmu-miR-98 |
| GO:0033673 | negative regulation of kinase activity                                   | Casp3, Dusp1, Dusp16, Dusp4, Igf1r, Il6, Ppm1f, Rb1, Spred3, Tnfaip3, Trib1                                                           | mmu-let-7a, mmu-let-7b, mmu-let-7c, mmu-let-7e, mmu-let-7f, mmu-miR-98 |
| GO:0033674 | positive regulation of kinase activity                                   | Braf, Ccnd1, Ccnd2, Ccny, Ccr7, Edn1, Epha4, Ercc6, Frs2, Ghr, Insr, Map3k1, Mdfi, Pak1, Pdgfb, Prlr, Tab2, Tgfbr1, Thbs1, Tnik, Vav3 | mmu-let-7a, mmu-let-7b, mmu-let-7c, mmu-let-7e, mmu-let-7f, mmu-miR-98 |
| GO:0033993 | response to lipid                                                        | Abcg1, Ccr7, Pdgfb, Tgfbr1, Tgfbr3                                                                                                    | mmu-let-7a, mmu-let-7b, mmu-let-7c, mmu-let-7e, mmu-let-7f, mmu-miR-98 |

|            |                                                               |                                                                                |                                                                        |
|------------|---------------------------------------------------------------|--------------------------------------------------------------------------------|------------------------------------------------------------------------|
| GO:0034148 | negative regulation of toll-like receptor 5 signaling pathway | Tnfaip3                                                                        | mmu-let-7a, mmu-let-7b, mmu-let-7c, mmu-let-7e, mmu-let-7f, mmu-miR-98 |
| GO:0034629 | cellular protein complex localization                         | Ralb, Wasl                                                                     | mmu-let-7a, mmu-let-7b, mmu-let-7c, mmu-let-7e, mmu-let-7f, mmu-miR-98 |
| GO:0034637 | cellular carbohydrate biosynthetic process                    | Arpp19, B3gnt1, Cercam, Il6, Insr, Lalba, Pcx                                  | mmu-let-7a, mmu-let-7b, mmu-let-7c, mmu-let-7e, mmu-let-7f, mmu-miR-98 |
| GO:0034644 | cellular response to UV                                       | Bcat1, Cdc25a, Usp47                                                           | mmu-let-7a, mmu-let-7b, mmu-let-7c, mmu-let-7e, mmu-let-7f, mmu-miR-98 |
| GO:0034695 | response to prostaglandin E stimulus                          | Ccr7, Tgfbr3                                                                   | mmu-let-7a, mmu-let-7b, mmu-let-7c, mmu-let-7e, mmu-let-7f, mmu-miR-98 |
| GO:0034699 | response to luteinizing hormone stimulus                      | Tgfbr3                                                                         | mmu-let-7a, mmu-let-7b, mmu-let-7c, mmu-let-7e, mmu-let-7f, mmu-miR-98 |
| GO:0035020 | regulation of Rac protein signal transduction                 | Crk, Epha4, Rictor                                                             | mmu-let-7a, mmu-let-7b, mmu-let-7c, mmu-let-7e, mmu-let-7f, mmu-miR-98 |
| GO:0035087 | siRNA loading onto RISC involved in RNA interference          | Clp1                                                                           | mmu-let-7a, mmu-let-7b, mmu-let-7c, mmu-let-7e, mmu-let-7f, mmu-miR-98 |
| GO:0035107 | appendage morphogenesis                                       | Fgf4, Mycn, Pbx1, Pbx2, Prrx1, Rdh10, Rspo2, Sall3, Sall4, Tbx5, Wnt9a, Zbtb16 | mmu-let-7a, mmu-let-7b, mmu-let-7c, mmu-let-7e, mmu-let-7f, mmu-miR-98 |
| GO:0035117 | embryonic arm morphogenesis                                   | Tbx5, Wnt9a                                                                    | mmu-let-7a, mmu-let-7b, mmu-let-7c, mmu-let-7e, mmu-let-7f, mmu-miR-98 |



|            |                                                             |                                                                                   |                                                                        |
|------------|-------------------------------------------------------------|-----------------------------------------------------------------------------------|------------------------------------------------------------------------|
| GO:0035136 | forelimb morphogenesis                                      | Rdh10, Rspo2, Sall3, Tbx5, Wnt9a, Zbtb16                                          | mmu-let-7a, mmu-let-7b, mmu-let-7c, mmu-let-7e, mmu-let-7f, mmu-miR-98 |
| GO:0035137 | hindlimb morphogenesis                                      | Fgf4, Rspo2, Sall3, Zbtb16                                                        | mmu-let-7a, mmu-let-7b, mmu-let-7c, mmu-let-7e, mmu-let-7f, mmu-miR-98 |
| GO:0035195 | gene silencing by miRNA                                     | Eif2c4, Limd1, Lin28a, Lin28b                                                     | mmu-let-7a, mmu-let-7b, mmu-let-7c, mmu-let-7e, mmu-let-7f, mmu-miR-98 |
| GO:0035280 | miRNA loading onto RISC involved in gene silencing by miRNA | Tarbp2                                                                            | mmu-let-7a, mmu-let-7b, mmu-let-7c, mmu-let-7e, mmu-let-7f, mmu-miR-98 |
| GO:0035725 | sodium ion transmembrane transport                          | Scn11a, Scn4b, Scn5a, Scn8a, Slc10a7, Slc5a6, Slc6a1                              | mmu-let-7a, mmu-let-7b, mmu-let-7c, mmu-let-7e, mmu-let-7f, mmu-miR-98 |
| GO:0035967 | cellular response to topologically incorrect protein        | Ccnd1, Ero1l, Yod1                                                                | mmu-let-7a, mmu-let-7b, mmu-let-7c, mmu-let-7e, mmu-let-7f, mmu-miR-98 |
| GO:0035970 | peptidyl-threonine dephosphorylation                        | Pdp2, Ppm1f                                                                       | mmu-let-7a, mmu-let-7b, mmu-let-7c, mmu-let-7e, mmu-let-7f, mmu-miR-98 |
| GO:0035978 | histone H2A-S139 phosphorylation                            | Hmga2                                                                             | mmu-let-7a, mmu-let-7b, mmu-let-7c, mmu-let-7e, mmu-let-7f, mmu-miR-98 |
| GO:0035986 | senescence-associated heterochromatin focus assembly        | Hmga1, Hmga2                                                                      | mmu-let-7a, mmu-let-7b, mmu-let-7c, mmu-let-7e, mmu-let-7f, mmu-miR-98 |
| GO:0040007 | growth                                                      | Adrb3, Agpat6, Apba1, Bcl2l1, Etnk2, Foxp2, Gdf6, Il10, Ing3, Rspo2, Socs1, Socs7 | mmu-let-7a, mmu-let-7b, mmu-let-7c, mmu-let-7e, mmu-let-7f, mmu-miR-98 |

|            |                                                                  |                                                                                                                                                                     |                                                                        |
|------------|------------------------------------------------------------------|---------------------------------------------------------------------------------------------------------------------------------------------------------------------|------------------------------------------------------------------------|
| GO:0040013 | negative regulation of locomotion                                | Chrd, Dlc1, Pdgfb, Ptpru, Rnf20, Tbx5, Tgfbr3, Thbs1, Trib1                                                                                                         | mmu-let-7a, mmu-let-7b, mmu-let-7c, mmu-let-7e, mmu-let-7f, mmu-miR-98 |
| GO:0040015 | negative regulation of multicellular organism growth             | Adrb2, Adrb3                                                                                                                                                        | mmu-let-7a, mmu-let-7b, mmu-let-7c, mmu-let-7e, mmu-let-7f, mmu-miR-98 |
| GO:0042036 | negative regulation of cytokine biosynthetic process             | Cd276, Il10, Il6, Tia1                                                                                                                                              | mmu-let-7a, mmu-let-7b, mmu-let-7c, mmu-let-7e, mmu-let-7f, mmu-miR-98 |
| GO:0042060 | wound healing                                                    | Adrb2, Cask, Col3a1, Klkb1, Map3k1, P2rx1, Pak1, Pdgfb, Pldn, Ppara, Thbs1                                                                                          | mmu-let-7a, mmu-let-7b, mmu-let-7c, mmu-let-7e, mmu-let-7f, mmu-miR-98 |
| GO:0042176 | regulation of protein catabolic process                          | Atg4b, Dlgap1, Egln2, Gipc1, Il10, Tnfaip3, Trib1, Trib2, Wnt1                                                                                                      | mmu-let-7a, mmu-let-7b, mmu-let-7c, mmu-let-7e, mmu-let-7f, mmu-miR-98 |
| GO:0042265 | peptidyl-asparagine hydroxylation                                | Hif1an                                                                                                                                                              | mmu-let-7a, mmu-let-7b, mmu-let-7c, mmu-let-7e, mmu-let-7f, mmu-miR-98 |
| GO:0042313 | protein kinase C deactivation                                    | Edn1                                                                                                                                                                | mmu-let-7a, mmu-let-7b, mmu-let-7c, mmu-let-7e, mmu-let-7f, mmu-miR-98 |
| GO:0042340 | keratan sulfate catabolic process                                | Gns                                                                                                                                                                 | mmu-let-7a, mmu-let-7b, mmu-let-7c, mmu-let-7e, mmu-let-7f, mmu-miR-98 |
| GO:0042526 | positive regulation of tyrosine phosphorylation of Stat6 protein | Il13                                                                                                                                                                | mmu-let-7a, mmu-let-7b, mmu-let-7c, mmu-let-7e, mmu-let-7f, mmu-miR-98 |
| GO:0042981 | regulation of apoptotic process                                  | Abcb9, Acvr1b, Acvr1c, Adrb2, Aen, Dcun1d3, Ddx19a, Dlc1, Egln2, Ercc6, Fasl, Fnip2, Ghr, Hic1, Hip1, Ikbke, Ing3, Map3k1, Plagl2, Ppara, Skil, Tbx5, Thoc1, Zbtb16 | mmu-let-7a, mmu-let-7b, mmu-let-7c, mmu-let-7e, mmu-let-7f, mmu-miR-98 |

|            |                                                                                           |                                                                                                                                                                                                          |                                                                        |
|------------|-------------------------------------------------------------------------------------------|----------------------------------------------------------------------------------------------------------------------------------------------------------------------------------------------------------|------------------------------------------------------------------------|
| GO:0043032 | positive regulation of macrophage activation                                              | Il13, Thbs1                                                                                                                                                                                              | mmu-let-7a, mmu-let-7b, mmu-let-7c, mmu-let-7e, mmu-let-7f, mmu-miR-98 |
| GO:0043066 | negative regulation of apoptotic process                                                  | Apbb3, Bcl2l1, Braf, Casp3, Ccr7, Dusp1, Edn1, Esr2, Fgf4, Grik2, Hmga2, Igf1r, Il10, Il6, Mapk8, Ngf, Ppargc1a, Prkaa2, Qars, Rnf7, Taf9b, Tgfbr1, Thbs1, Tnfaip3, Usp47, Wnt1                          | mmu-let-7a, mmu-let-7b, mmu-let-7c, mmu-let-7e, mmu-let-7f, mmu-miR-98 |
| GO:0043068 | positive regulation of programmed cell death                                              | Abcb9, Acvr1b, Acvr1c, Adrb2, Aen, Bcl2l1, Casp3, Dcun1d3, Ddx19a, Dlc1, Dusp1, Ercc6, Esr2, Fasl, Fnip2, Hic1, Hip1, Hmga2, Ikbke, Il10, Ing3, Map3k1, Mapk8, Plagl2, Rnf7, Tbx5, Tgfbr1, Thbs1, Zbtb16 | mmu-let-7a, mmu-let-7b, mmu-let-7c, mmu-let-7e, mmu-let-7f, mmu-miR-98 |
| GO:0043085 | positive regulation of catalytic activity                                                 | Adrb2, Adrb3, Braf, Ccnd1, Ccnd2, Ccny, Epha4, Ercc6, Frs2, Ghr, Gnal, Htr4, Insr, Map3k1, Mdfi, Pak1, Pdgfb, Prlr, Tab2, Tgfbr1, Thbs1, Tnik, Trib1, Trib2, Vav3, Wnt9b                                 | mmu-let-7a, mmu-let-7b, mmu-let-7c, mmu-let-7e, mmu-let-7f, mmu-miR-98 |
| GO:0043087 | regulation of GTPase activity                                                             | Arhgap20, Arhgap28, Arhgef15, Ccr7, Crk, Dlc1, Epha3, Epha4, Gipc1, Plekhg6, Rgs16, Rictor, Srgap3, Stard13, Tsc1, Vav3                                                                                  | mmu-let-7a, mmu-let-7b, mmu-let-7c, mmu-let-7e, mmu-let-7f, mmu-miR-98 |
| GO:0043113 | receptor clustering                                                                       | Grik2, Grin2b, Pak1                                                                                                                                                                                      | mmu-let-7a, mmu-let-7b, mmu-let-7c, mmu-let-7e, mmu-let-7f, mmu-miR-98 |
| GO:0043154 | negative regulation of cysteine-type endopeptidase activity involved in apoptotic process | Bcl2l1, Il6, Thbs1, Tnfaip3, Usp47, Wnt9a                                                                                                                                                                | mmu-let-7a, mmu-let-7b, mmu-let-7c, mmu-let-7e, mmu-let-7f, mmu-miR-98 |
| GO:0043251 | sodium-dependent organic anion transport                                                  | Slc10a6                                                                                                                                                                                                  | mmu-let-7a, mmu-let-7b, mmu-let-7c, mmu-let-7e, mmu-let-7f, mmu-miR-98 |

|            |                                                                                    |                                                                                                                  |                                                                        |
|------------|------------------------------------------------------------------------------------|------------------------------------------------------------------------------------------------------------------|------------------------------------------------------------------------|
| GO:0043392 | negative regulation of DNA binding                                                 | Habp4, Hmga2, Mdfi, Ppara, Zfp462                                                                                | mmu-let-7a, mmu-let-7b, mmu-let-7c, mmu-let-7e, mmu-let-7f, mmu-miR-98 |
| GO:0043405 | regulation of MAP kinase activity                                                  | Ccr7, Dusp1, Dusp16, Dusp4, Edn1, Epha4, Ercc6, Frs2, Ghr, Insr, Map3k1, Mdfi, Pak1, Pdgfb, Spred3, Thbs1, Trib1 | mmu-let-7a, mmu-let-7b, mmu-let-7c, mmu-let-7e, mmu-let-7f, mmu-miR-98 |
| GO:0043408 | regulation of MAPK cascade                                                         | Ccr7, Dusp1, Dusp16, Dusp4, Edn1, Epha4, Ercc6, Grik2, Grin2b, Map3k1, Map4k4, Mdfi, Pak1, Spred3                | mmu-let-7a, mmu-let-7b, mmu-let-7c, mmu-let-7e, mmu-let-7f, mmu-miR-98 |
| GO:0043410 | positive regulation of MAPK cascade                                                | Adrb2, Adrb3, Braf, Dusp22, Esr2, Fgf4, Igf1r, Il6, Insr, Pdgfb, Sema4c, Taok1                                   | mmu-let-7a, mmu-let-7b, mmu-let-7c, mmu-let-7e, mmu-let-7f, mmu-miR-98 |
| GO:0043433 | negative regulation of sequence-specific DNA binding transcription factor activity | 1810074P20Rik, Hand1, Nlrc5, Pbx1, Tnfaip3, Trib1, Trib2                                                         | mmu-let-7a, mmu-let-7b, mmu-let-7c, mmu-let-7e, mmu-let-7f, mmu-miR-98 |
| GO:0043471 | regulation of cellular carbohydrate catabolic process                              | Insr, Ppara, Prkaa2                                                                                              | mmu-let-7a, mmu-let-7b, mmu-let-7c, mmu-let-7e, mmu-let-7f, mmu-miR-98 |
| GO:0043507 | positive regulation of JUN kinase activity                                         | Edn1, Epha4, Pak1                                                                                                | mmu-let-7a, mmu-let-7b, mmu-let-7c, mmu-let-7e, mmu-let-7f, mmu-miR-98 |
| GO:0043526 | neuroprotection                                                                    | Esr2, Ghr, Il6, Ppara                                                                                            | mmu-let-7a, mmu-let-7b, mmu-let-7c, mmu-let-7e, mmu-let-7f, mmu-miR-98 |
| GO:0043568 | positive regulation of insulin-like growth factor receptor signaling pathway       | Al464131, Wnt1                                                                                                   | mmu-let-7a, mmu-let-7b, mmu-let-7c, mmu-let-7e, mmu-let-7f, mmu-miR-98 |

|            |                                                                                         |                                                                                                                                                                                 |                                                                        |
|------------|-----------------------------------------------------------------------------------------|---------------------------------------------------------------------------------------------------------------------------------------------------------------------------------|------------------------------------------------------------------------|
| GO:0043588 | skin development                                                                        | Col1a2, Col3a1, Col5a2, Eda, Fras1, Tcf7l1                                                                                                                                      | mmu-let-7a, mmu-let-7b, mmu-let-7c, mmu-let-7e, mmu-let-7f, mmu-miR-98 |
| GO:0043632 | modification-dependent macromolecule catabolic process                                  | Cdc34, Dnajb9, Edem1, Edem3, Fbxl12, Fbxl14, Gipc1, Map3k1, Rnf20, Trib1, Trib2, Uhrf2, Usp12, Usp24, Usp38, Usp47, Wnt1, Yod1                                                  | mmu-let-7a, mmu-let-7b, mmu-let-7c, mmu-let-7e, mmu-let-7f, mmu-miR-98 |
| GO:0043900 | regulation of multi-organism process                                                    | Il10, Prdm1, Tarbp2, Tnfaip3, Trib1                                                                                                                                             | mmu-let-7a, mmu-let-7b, mmu-let-7c, mmu-let-7e, mmu-let-7f, mmu-miR-98 |
| GO:0044092 | negative regulation of molecular function                                               | Adrb2, Bcl2l1, Casp3, Dusp1, Dusp16, Dusp4, Farp1, Gpatch2, Habp4, Hmga2, Igf1r, Il6, Insr, Mapk8, Mdfi, Ppara, Ppm1f, Rb1, Senp2, Slc7a14, Spred3, Thbs1, Usp47, Wnt9a, Zfp462 | mmu-let-7a, mmu-let-7b, mmu-let-7c, mmu-let-7e, mmu-let-7f, mmu-miR-98 |
| GO:0044246 | regulation of multicellular organismal metabolic process                                | Adrb2, Adrb3, Il6                                                                                                                                                               | mmu-let-7a, mmu-let-7b, mmu-let-7c, mmu-let-7e, mmu-let-7f, mmu-miR-98 |
| GO:0044387 | negative regulation of protein kinase activity by regulation of protein phosphorylation | Ppm1f                                                                                                                                                                           | mmu-let-7a, mmu-let-7b, mmu-let-7c, mmu-let-7e, mmu-let-7f, mmu-miR-98 |
| GO:0045017 | glycerolipid biosynthetic process                                                       | Agpat6, Etnk1, Etnk2, Pcyt1b, Pdgfb, Piga, Thrsp                                                                                                                                | mmu-let-7a, mmu-let-7b, mmu-let-7c, mmu-let-7e, mmu-let-7f, mmu-miR-98 |
| GO:0045081 | negative regulation of interleukin-10 biosynthetic process                              | Trib2                                                                                                                                                                           | mmu-let-7a, mmu-let-7b, mmu-let-7c, mmu-let-7e, mmu-let-7f, mmu-miR-98 |

|            |                                                                 |                                                                                                                |                                                                        |
|------------|-----------------------------------------------------------------|----------------------------------------------------------------------------------------------------------------|------------------------------------------------------------------------|
| GO:0045444 | fat cell differentiation                                        | Ccnd1, Fndc3b, Hmga2, Socs1, Socs7, Trib2, Wnt1, Zbtb16                                                        | mmu-let-7a, mmu-let-7b, mmu-let-7c, mmu-let-7e, mmu-let-7f, mmu-miR-98 |
| GO:0045494 | photoreceptor cell maintenance                                  | Ercc6, Iqcb1, Nphp3                                                                                            | mmu-let-7a, mmu-let-7b, mmu-let-7c, mmu-let-7e, mmu-let-7f, mmu-miR-98 |
| GO:0045596 | negative regulation of cell differentiation                     | Ccnd1, Chrd, Esrrb, Ezh2, Fgf4, Lmx1a, Nkap, Pbx1, Rbpj, Skil, Tcf7l1, Tgfb1, Tob2, Trib2, Wnt1, Wnt9a, Zbtb16 | mmu-let-7a, mmu-let-7b, mmu-let-7c, mmu-let-7e, mmu-let-7f, mmu-miR-98 |
| GO:0045624 | positive regulation of T-helper cell differentiation            | Ccr7, Il6                                                                                                      | mmu-let-7a, mmu-let-7b, mmu-let-7c, mmu-let-7e, mmu-let-7f, mmu-miR-98 |
| GO:0045686 | negative regulation of glial cell differentiation               | Hmga2, Lin28a, Lingo1, Mycn                                                                                    | mmu-let-7a, mmu-let-7b, mmu-let-7c, mmu-let-7e, mmu-let-7f, mmu-miR-98 |
| GO:0045737 | positive regulation of cyclin-dependent protein kinase activity | Ccnd1, Ccnd2, Ccny, Pdgb                                                                                       | mmu-let-7a, mmu-let-7b, mmu-let-7c, mmu-let-7e, mmu-let-7f, mmu-miR-98 |
| GO:0045740 | positive regulation of DNA replication                          | Igf1r, Il6, Insr, Mapk8, Pdgb                                                                                  | mmu-let-7a, mmu-let-7b, mmu-let-7c, mmu-let-7e, mmu-let-7f, mmu-miR-98 |
| GO:0045768 | positive regulation of anti-apoptosis                           | Bcl2l1, Dusp1, Igf1r, Il6                                                                                      | mmu-let-7a, mmu-let-7b, mmu-let-7c, mmu-let-7e, mmu-let-7f, mmu-miR-98 |
| GO:0045778 | positive regulation of ossification                             | Tob2, Zbtb16                                                                                                   | mmu-let-7a, mmu-let-7b, mmu-let-7c, mmu-let-7e, mmu-let-7f, mmu-miR-98 |
| GO:0045786 | negative regulation of cell cycle                               | Casp3, Dcun1d3, Nme6, Tnfaip3, Usp47                                                                           | mmu-let-7a, mmu-let-7b, mmu-let-7c, mmu-let-7e, mmu-let-7f, mmu-miR-98 |
| GO:0045821 | positive regulation of glycolysis                               | Insr, Prkaa2                                                                                                   | mmu-let-7a, mmu-let-7b, mmu-let-7c, mmu-let-7e, mmu-let-7f, mmu-miR-98 |

|            |                                                                      |                                                                                                                                                                                                                                                           |                                                                        |
|------------|----------------------------------------------------------------------|-----------------------------------------------------------------------------------------------------------------------------------------------------------------------------------------------------------------------------------------------------------|------------------------------------------------------------------------|
| GO:0045840 | positive regulation of mitosis                                       | Edn1, Insr, Pdgfb, Rb1                                                                                                                                                                                                                                    | mmu-let-7a, mmu-let-7b, mmu-let-7c, mmu-let-7e, mmu-let-7f, mmu-miR-98 |
| GO:0045859 | regulation of protein kinase activity                                | Braf, Casp3, Ccnd1, Ccnd2, Ccny, Ccr7, Dusp1, Dusp16, Dusp4, Edn1, Epha4, Ercc6, Frs2, Ghr, Igf1r, Il6, Insr, Map3k1, Mdfi, Pak1, Pdgfb, Ppm1f, Prlr, Rb1, Spred3, Tab2, Tgfbr1, Thbs1, Tnfaip3, Tnik, Trib1, Tsc1                                        | mmu-let-7a, mmu-let-7b, mmu-let-7c, mmu-let-7e, mmu-let-7f, mmu-miR-98 |
| GO:0045879 | negative regulation of smoothed signaling pathway                    | Chrd, Rb1, Sall3                                                                                                                                                                                                                                          | mmu-let-7a, mmu-let-7b, mmu-let-7c, mmu-let-7e, mmu-let-7f, mmu-miR-98 |
| GO:0045892 | negative regulation of transcription, DNA-dependent                  | Cbx5, Dkk3, Ezh2, Hmga1, Lgr4, Limd1, Mll2, Pdgfb, Phf8, Ppargc1b, Ppm1f, Rbpj, Tcf7l1, Usp47, Zbtb16                                                                                                                                                     | mmu-let-7a, mmu-let-7b, mmu-let-7c, mmu-let-7e, mmu-let-7f, mmu-miR-98 |
| GO:0045927 | positive regulation of growth                                        | Adrb2, Ghr, Hmga2, Insr, Ppm1f, Spnb4                                                                                                                                                                                                                     | mmu-let-7a, mmu-let-7b, mmu-let-7c, mmu-let-7e, mmu-let-7f, mmu-miR-98 |
| GO:0045937 | positive regulation of phosphate metabolic process                   | Acvr1b, Acvr2a, Braf, Ccnd1, Ccnd2, Dlc1, Gdf6, Ghr, Il13, Il6, Insr, Ngf, Pak1, Pdgfb, Ppargc1b, Rictor, Senp2, Taok1, Tgfbr1, Thbs1, Wnt1                                                                                                               | mmu-let-7a, mmu-let-7b, mmu-let-7c, mmu-let-7e, mmu-let-7f, mmu-miR-98 |
| GO:0045944 | positive regulation of transcription from RNA polymerase II promoter | Acvr1b, Adrb2, Cask, Esr2, Fgf4, Gabpa, Hand1, Hif3a, Hmga1, Hmga2, Ikzf2, Il10, Il6, Map3k1, Meis2, Mll2, Mllt10, Mycn, Nlrc5, Pbx1, Pbx2, Plagl2, Ppargc1a, Ppargc1b, Rb1, Rbpj, Sall4, Smarcc1, Srebf2, Tbx5, Tcf7l1, Tead3, Tead4, Wnt1, Zfp462, Elf4 | mmu-let-7a, mmu-let-7b, mmu-let-7c, mmu-let-7e, mmu-let-7f, mmu-miR-98 |
| GO:0046321 | positive regulation of fatty acid oxidation                          | Ppara, Ppargc1a                                                                                                                                                                                                                                           | mmu-let-7a, mmu-let-7b, mmu-let-7c, mmu-let-7e, mmu-let-7f, mmu-miR-98 |
| GO:0046328 | regulation of JNK cascade                                            | Ccr7, Dusp22, Edn1, Epha4, Ercc6, Grik2, Igf1r, Map3k1, Map4k4, Mdfi, Pak1, Taok1                                                                                                                                                                         | mmu-let-7a, mmu-let-7b, mmu-let-7c, mmu-let-7e, mmu-let-7f, mmu-miR-98 |

|            |                                                               |                                                                                               |                                                                        |
|------------|---------------------------------------------------------------|-----------------------------------------------------------------------------------------------|------------------------------------------------------------------------|
| GO:0046425 | regulation of JAK-STAT cascade                                | Dot1l, Ghr, Il13, Il6, Nlk                                                                    | mmu-let-7a, mmu-let-7b, mmu-let-7c, mmu-let-7e, mmu-let-7f, mmu-miR-98 |
| GO:0046426 | negative regulation of JAK-STAT cascade                       | Hmga2, Socs1                                                                                  | mmu-let-7a, mmu-let-7b, mmu-let-7c, mmu-let-7e, mmu-let-7f, mmu-miR-98 |
| GO:0046470 | phosphatidylcholine metabolic process                         | Agpat6, Pcyt1b, Pla2g15                                                                       | mmu-let-7a, mmu-let-7b, mmu-let-7c, mmu-let-7e, mmu-let-7f, mmu-miR-98 |
| GO:0046546 | development of primary male sexual characteristics            | Acvr2a, Bcl2l1, Ccnd1, Esr2, Fndc3a, Hmga2, Lgr4, Wnt9b                                       | mmu-let-7a, mmu-let-7b, mmu-let-7c, mmu-let-7e, mmu-let-7f, mmu-miR-98 |
| GO:0046619 | optic placode formation involved in camera-type eye formation | Frs2                                                                                          | mmu-let-7a, mmu-let-7b, mmu-let-7c, mmu-let-7e, mmu-let-7f, mmu-miR-98 |
| GO:0046666 | retinal cell programmed cell death                            | Fasl, Slc4a7                                                                                  | mmu-let-7a, mmu-let-7b, mmu-let-7c, mmu-let-7e, mmu-let-7f, mmu-miR-98 |
| GO:0046777 | protein autophosphorylation                                   | Acvr1b, C230081A13Rik, Dyrk1a, Epha4, Igf1r, Insr, Map3k1, Nlk, Pak1, Slk, Tgfbr1, Tnik, Ulk2 | mmu-let-7a, mmu-let-7b, mmu-let-7c, mmu-let-7e, mmu-let-7f, mmu-miR-98 |
| GO:0046782 | regulation of viral transcription                             | Hmga2, Map3k1, Tarbp2                                                                         | mmu-let-7a, mmu-let-7b, mmu-let-7c, mmu-let-7e, mmu-let-7f, mmu-miR-98 |
| GO:0046784 | intronless viral mRNA export from host nucleus                | Thoc1, Thoc2                                                                                  | mmu-let-7a, mmu-let-7b, mmu-let-7c, mmu-let-7e, mmu-let-7f, mmu-miR-98 |
| GO:0046898 | response to cycloheximide                                     | Bcl2l1, Ghr                                                                                   | mmu-let-7a, mmu-let-7b, mmu-let-7c, mmu-let-7e, mmu-let-7f, mmu-miR-98 |



|            |                                             |                                                                                                                                                                                                                                              |                                                                        |
|------------|---------------------------------------------|----------------------------------------------------------------------------------------------------------------------------------------------------------------------------------------------------------------------------------------------|------------------------------------------------------------------------|
| GO:0046907 | intracellular transport                     | Abcg1, Ap1s1, Apba1, Bcap29, Bcl2l1, Cask, Cry2, Eda, Ergic1, Gga3, Gipc1, Golga7, Grik2, Hook1, Il6, Kpna1, Nefm, Pacs2, Sec16b, Snx16, Stx17, Stx3, Tgfbr1, Thoc1, Thoc2, Timm17b, Trappc1, Tsc1, Vps26b, Xpot, Zc3h3                      | mmu-let-7a, mmu-let-7b, mmu-let-7c, mmu-let-7e, mmu-let-7f, mmu-miR-98 |
| GO:0046928 | regulation of neurotransmitter secretion    | Kcnc3, Kcnc4, Ngf, Slc30a1                                                                                                                                                                                                                   | mmu-let-7a, mmu-let-7b, mmu-let-7c, mmu-let-7e, mmu-let-7f, mmu-miR-98 |
| GO:0048013 | ephrin receptor signaling pathway           | Crk, Epha3, Epha4                                                                                                                                                                                                                            | mmu-let-7a, mmu-let-7b, mmu-let-7c, mmu-let-7e, mmu-let-7f, mmu-miR-98 |
| GO:0048208 | COPII vesicle coating                       | Sec16b                                                                                                                                                                                                                                       | mmu-let-7a, mmu-let-7b, mmu-let-7c, mmu-let-7e, mmu-let-7f, mmu-miR-98 |
| GO:0048332 | mesoderm morphogenesis                      | Chrd, Hand1, Hmga2, Tcf7l1, Wnt1                                                                                                                                                                                                             | mmu-let-7a, mmu-let-7b, mmu-let-7c, mmu-let-7e, mmu-let-7f, mmu-miR-98 |
| GO:0048468 | cell development                            | Acta1, Agpat6, A1464131, C230081A13Rik, Ccr7, Col4a1, Col4a5, Dmd, Epha3, Esr2, Ezh2, Fasl, Gas7, Gdf6, Igf1r, Il6, Lmx1a, Mapk8, Nefm, Ngf, Pak1, Pbx1, Pbx3, Pdgfb, Rb1, Rbm38, Sall3, Skil, Slc4a7, Spnb4, Stx3, Tnik, Unc5a, Utrn, Wnt9b | mmu-let-7a, mmu-let-7b, mmu-let-7c, mmu-let-7e, mmu-let-7f, mmu-miR-98 |
| GO:0048496 | maintenance of organ identity               | lqcb1, Nphp3                                                                                                                                                                                                                                 | mmu-let-7a, mmu-let-7b, mmu-let-7c, mmu-let-7e, mmu-let-7f, mmu-miR-98 |
| GO:0048518 | positive regulation of biological process   | Abcg1, Adipor2, Atg4b, Egln2, Klhl6, Klkb1, Masp1, Nat8l, P2rx1, Polr3d, Scn5a, Tarbp2, Tob2                                                                                                                                                 | mmu-let-7a, mmu-let-7b, mmu-let-7c, mmu-let-7e, mmu-let-7f, mmu-miR-98 |
| GO:0048585 | negative regulation of response to stimulus | Cask, Cd276, Col3a1, Epha4, Il10, Masp1, Ppara, Tarbp2, Tnfrsf1b                                                                                                                                                                             | mmu-let-7a, mmu-let-7b, mmu-let-7c, mmu-let-7e, mmu-let-7f, mmu-miR-98 |

|            |                                                      |                                                                                                                                           |                                                                        |
|------------|------------------------------------------------------|-------------------------------------------------------------------------------------------------------------------------------------------|------------------------------------------------------------------------|
| GO:0048589 | developmental growth                                 | Acvr1c, Adrb2, Bin3, Esrrb, Insr, Mll2, Ngf, Prlr, Rdh10, Sall4, Tbx5, Thbs1                                                              | mmu-let-7a, mmu-let-7b, mmu-let-7c, mmu-let-7e, mmu-let-7f, mmu-miR-98 |
| GO:0048598 | embryonic morphogenesis                              | Dlc1, Edn1, Esrrb, Fgf4, Il10, Mdfi, Mycn, Pbx1, Pbx2, Prrx1, Rdh10, Rspo2, Sall4, Sema4c, Tbx5, Tgfbr1, Tsc1, Wnt1, Wnt9a, Wnt9b, Zbtb16 | mmu-let-7a, mmu-let-7b, mmu-let-7c, mmu-let-7e, mmu-let-7f, mmu-miR-98 |
| GO:0048608 | reproductive structure development                   | Acvr2a, Bcl2l1, Ccnd1, Esr2, Fndc3a, Frs2, Hmga2, Igf1r, Pcyt1b, Prlr, Rdh10, Wnt9b                                                       | mmu-let-7a, mmu-let-7b, mmu-let-7c, mmu-let-7e, mmu-let-7f, mmu-miR-98 |
| GO:0048633 | positive regulation of skeletal muscle tissue growth | Adrb2                                                                                                                                     | mmu-let-7a, mmu-let-7b, mmu-let-7c, mmu-let-7e, mmu-let-7f, mmu-miR-98 |
| GO:0048640 | negative regulation of developmental growth          | Ntn1, Sema4f, Ulk2                                                                                                                        | mmu-let-7a, mmu-let-7b, mmu-let-7c, mmu-let-7e, mmu-let-7f, mmu-miR-98 |
| GO:0048699 | generation of neurons                                | Esr2, Ezh2, Frs2, Hmga2, Mycn, Tcf7l1                                                                                                     | mmu-let-7a, mmu-let-7b, mmu-let-7c, mmu-let-7e, mmu-let-7f, mmu-miR-98 |
| GO:0048701 | embryonic cranial skeleton morphogenesis             | Prrx1, Rdh10, Tgfbr1, Wnt9b                                                                                                               | mmu-let-7a, mmu-let-7b, mmu-let-7c, mmu-let-7e, mmu-let-7f, mmu-miR-98 |
| GO:0048705 | skeletal system morphogenesis                        | Fgf4, Mdfi, Mycn, Ppargc1b, Prrx1, Rdh10, Tgfbr1, Thbs1, Wnt9a, Wnt9b                                                                     | mmu-let-7a, mmu-let-7b, mmu-let-7c, mmu-let-7e, mmu-let-7f, mmu-miR-98 |
| GO:0048706 | embryonic skeletal system development                | Acvr2a, Hoxd1, Mdfi, Mycn, Pbx1, Prrx1, Rdh10, Tgfbr1, Wnt9a, Wnt9b                                                                       | mmu-let-7a, mmu-let-7b, mmu-let-7c, mmu-let-7e, mmu-let-7f, mmu-miR-98 |
| GO:0048710 | regulation of astrocyte differentiation              | Epha4, Hmga2, Mycn                                                                                                                        | mmu-let-7a, mmu-let-7b, mmu-let-7c, mmu-let-7e, mmu-let-7f, mmu-miR-98 |
| GO:0048747 | muscle fiber development                             | Acta1, Al464131, Col4a1, Col4a5, Pak1, Rbm38, Utrn                                                                                        | mmu-let-7a, mmu-let-7b, mmu-let-7c, mmu-let-7e, mmu-let-7f, mmu-miR-98 |

|            |                                                      |                                                                          |                                                                        |
|------------|------------------------------------------------------|--------------------------------------------------------------------------|------------------------------------------------------------------------|
| GO:0048754 | branching morphogenesis of a tube                    | Edn1, Lgr4, Mycn, Pak1, Pbx1, Plxnd1, Rdh10, Rspo2, Wnt1, Wnt9b          | mmu-let-7a, mmu-let-7b, mmu-let-7c, mmu-let-7e, mmu-let-7f, mmu-miR-98 |
| GO:0048864 | stem cell development                                | Esrrb, Fgf4, Hmga2, Lin28a, Nkap, Tcf7l1                                 | mmu-let-7a, mmu-let-7b, mmu-let-7c, mmu-let-7e, mmu-let-7f, mmu-miR-98 |
| GO:0050657 | nucleic acid transport                               | Ahctf1, Ddx19a, Khsrp, Nxt2, Senp2, Thoc1, Thoc2, Tsc1, Xpot, Zc3h3      | mmu-let-7a, mmu-let-7b, mmu-let-7c, mmu-let-7e, mmu-let-7f, mmu-miR-98 |
| GO:0050670 | regulation of lymphocyte proliferation               | Casp3, Ccr7, Cd276, Cd86, Il10, Il13, Il6, Prdm1, Vav3                   | mmu-let-7a, mmu-let-7b, mmu-let-7c, mmu-let-7e, mmu-let-7f, mmu-miR-98 |
| GO:0050679 | positive regulation of epithelial cell proliferation | Ccnd1, Ccnd2, Foxp2, Il6, Pdgfb, Rictor, Tnfaip3, Vash2                  | mmu-let-7a, mmu-let-7b, mmu-let-7c, mmu-let-7e, mmu-let-7f, mmu-miR-98 |
| GO:0050728 | negative regulation of inflammatory response         | Adrb2, Cd276, Il10, Tnfaip3, Tnfrsf1b                                    | mmu-let-7a, mmu-let-7b, mmu-let-7c, mmu-let-7e, mmu-let-7f, mmu-miR-98 |
| GO:0050771 | negative regulation of axonogenesis                  | Epha4, Ntn1, Rufy3, Sema4f, Ulk2                                         | mmu-let-7a, mmu-let-7b, mmu-let-7c, mmu-let-7e, mmu-let-7f, mmu-miR-98 |
| GO:0050864 | regulation of B cell activation                      | Casp3, Il10, Il13, Il6, Prdm1, Tnfaip3, Vav3                             | mmu-let-7a, mmu-let-7b, mmu-let-7c, mmu-let-7e, mmu-let-7f, mmu-miR-98 |
| GO:0050867 | positive regulation of cell activation               | Ccr7, Cd276, Cd86, Il13, Il6, Nkap, Pldn, Prdm1, Thbs1, Vav3             | mmu-let-7a, mmu-let-7b, mmu-let-7c, mmu-let-7e, mmu-let-7f, mmu-miR-98 |
| GO:0050873 | brown fat cell differentiation                       | Adrb2, Adrb3, Aldh6a1, Ero1l                                             | mmu-let-7a, mmu-let-7b, mmu-let-7c, mmu-let-7e, mmu-let-7f, mmu-miR-98 |
| GO:0050878 | regulation of body fluid levels                      | Adrb2, Agpat6, Aqp4, Ccnd1, Edn1, Klkb1, P2rx1, Pdgfb, Pldn, Prlr, Thbs1 | mmu-let-7a, mmu-let-7b, mmu-let-7c, mmu-let-7e, mmu-let-7f, mmu-miR-98 |

|            |                                                                                    |                                                                                                                                                                                                        |                                                                        |
|------------|------------------------------------------------------------------------------------|--------------------------------------------------------------------------------------------------------------------------------------------------------------------------------------------------------|------------------------------------------------------------------------|
| GO:0051017 | actin filament bundle assembly                                                     | Dlc1, Gas7, Map3k1, Pak1, Ppm1f, Tsc1                                                                                                                                                                  | mmu-let-7a, mmu-let-7b, mmu-let-7c, mmu-let-7e, mmu-let-7f, mmu-miR-98 |
| GO:0051028 | mRNA transport                                                                     | Ahctf1, Ddx19a, Khsrp, Nxt2, Senp2, Thoc1, Thoc2, Zc3h3                                                                                                                                                | mmu-let-7a, mmu-let-7b, mmu-let-7c, mmu-let-7e, mmu-let-7f, mmu-miR-98 |
| GO:0051056 | regulation of small GTPase mediated signal transduction                            | Arhgef15, Arpp19, Ccr7, Crk, Dlc1, Epha3, Epha4, Obscn, Plekhg6, Psd3, Rasgrp1, Rictor, Tsc1, Vav3                                                                                                     | mmu-let-7a, mmu-let-7b, mmu-let-7c, mmu-let-7e, mmu-let-7f, mmu-miR-98 |
| GO:0051091 | positive regulation of sequence-specific DNA binding transcription factor activity | Eda, Esr2, Hmga2, Il10, Il6, Mtpn, Ngf, Ppargc1a, Tgfbr3, Wnt1                                                                                                                                         | mmu-let-7a, mmu-let-7b, mmu-let-7c, mmu-let-7e, mmu-let-7f, mmu-miR-98 |
| GO:0051093 | negative regulation of developmental process                                       | Arhgef15, Col4a2, Fasl, Gtf2i, Il6, Tbx5, Thbs1                                                                                                                                                        | mmu-let-7a, mmu-let-7b, mmu-let-7c, mmu-let-7e, mmu-let-7f, mmu-miR-98 |
| GO:0051094 | positive regulation of developmental process                                       | Acvr1b, Acvr2a, Adrb2, Ccr7, Cd276, Edn1, Fndc3b, Frs2, Gdf6, Hmga1, Hmga2, Il6, Insr, Lgr4, Lin28a, Mapk8, Msr1, Ngf, Nkap, Ntn1, Ppargc1b, Prdm1, Rb1, Skil, Tbx5, Thbs1, Vash2, Wnt1, Wnt9a, Zbtb16 | mmu-let-7a, mmu-let-7b, mmu-let-7c, mmu-let-7e, mmu-let-7f, mmu-miR-98 |
| GO:0051098 | regulation of binding                                                              | Adrb2, Calm1, Dot1l, Habp4, Hmga2, Mapk8, Mdfi, Ppara, Senp2, Tgfbr1, Tgfbr3, Zfp462                                                                                                                   | mmu-let-7a, mmu-let-7b, mmu-let-7c, mmu-let-7e, mmu-let-7f, mmu-miR-98 |
| GO:0051129 | negative regulation of cellular component organization                             | Arhgef15, Bcl2l1, Clasp2, Dlc1, Epha4, Map3k1, Mtpn, Nme6, Ntn1, Rdx, Rufy3, Sema4f, Tgfbr3, Ulk2, Ercc4                                                                                               | mmu-let-7a, mmu-let-7b, mmu-let-7c, mmu-let-7e, mmu-let-7f, mmu-miR-98 |
| GO:0051146 | striated muscle cell differentiation                                               | Acta1, Al464131, Col4a1, Col4a5, Edn1, Ezh2, Pak1, Rb1, Rbm38, Tbx5, Tsc1, Utrn, Wnt1                                                                                                                  | mmu-let-7a, mmu-let-7b, mmu-let-7c, mmu-let-7e, mmu-let-7f, mmu-miR-98 |
| GO:0051216 | cartilage development                                                              | Edn1, Fgf4, Hmga2, Mycn, Prrx1, Thbs1, Wnt9a, Zbtb16                                                                                                                                                   | mmu-let-7a, mmu-let-7b, mmu-let-7c, mmu-let-7e, mmu-let-7f, mmu-miR-98 |

|            |                                                    |                                                                                                                                                                                                                                 |                                                                        |
|------------|----------------------------------------------------|---------------------------------------------------------------------------------------------------------------------------------------------------------------------------------------------------------------------------------|------------------------------------------------------------------------|
| GO:0051236 | establishment of RNA localization                  | Ahctf1, Ddx19a, Khshp, Nxt2, Senp2, Thoc1, Thoc2, Tsc1, Xpot, Zc3h3                                                                                                                                                             | mmu-let-7a, mmu-let-7b, mmu-let-7c, mmu-let-7e, mmu-let-7f, mmu-miR-98 |
| GO:0051239 | regulation of multicellular organismal process     | Acvr1c, Agpat6, Ghr, Gipc1, Grid2ip, Grik2, Grin2b, Il10, Il13, Kcnc3, Kcnc4, Klkb1, Mgl1, Mtpn, Nat8l, P2rx1, Pbx3, Polr3d, Ppm1f, Prkaa2, Rab8b, Scn5a, Slc30a1, Slc6a1, Spnb4, Tia1, Trib2                                   | mmu-let-7a, mmu-let-7b, mmu-let-7c, mmu-let-7e, mmu-let-7f, mmu-miR-98 |
| GO:0051251 | positive regulation of lymphocyte activation       | Ccr7, Cd276, Cd86, Il13, Il6, Nkap, Pldn, Prdm1, Vav3                                                                                                                                                                           | mmu-let-7a, mmu-let-7b, mmu-let-7c, mmu-let-7e, mmu-let-7f, mmu-miR-98 |
| GO:0051271 | negative regulation of cellular component movement | Chrd, Dlc1, Pdgfb, Ptpru, Rnf20, Tbx5, Tgfbr3, Thbs1, Trib1                                                                                                                                                                     | mmu-let-7a, mmu-let-7b, mmu-let-7c, mmu-let-7e, mmu-let-7f, mmu-miR-98 |
| GO:0051290 | protein heterotetramerization                      | Insr, Rrm2                                                                                                                                                                                                                      | mmu-let-7a, mmu-let-7b, mmu-let-7c, mmu-let-7e, mmu-let-7f, mmu-miR-98 |
| GO:0051291 | protein heterooligomerization                      | Braf, Gabra6, Igf1r, P2rx1, Prkaa2, Tsc1                                                                                                                                                                                        | mmu-let-7a, mmu-let-7b, mmu-let-7c, mmu-let-7e, mmu-let-7f, mmu-miR-98 |
| GO:0051302 | regulation of cell division                        | Calm1, Fgf4, Fgf5, Igf1r, Pdgfb, Wnt9b                                                                                                                                                                                          | mmu-let-7a, mmu-let-7b, mmu-let-7c, mmu-let-7e, mmu-let-7f, mmu-miR-98 |
| GO:0051325 | interphase                                         | Acvr1b, Arpp19, Bach1, Bcat1, Bcl2l1, Ccnd1, Ccnd2, Ccny, Cdc25a, Dcun1d3, E2f5, E2f6, Ezh2, Hmga2, Lsm11, Phf8, Rb1, Usp47, Wnt9a                                                                                              | mmu-let-7a, mmu-let-7b, mmu-let-7c, mmu-let-7e, mmu-let-7f, mmu-miR-98 |
| GO:0051338 | regulation of transferase activity                 | Braf, Casp3, Ccnd1, Ccnd2, Ccny, Ccr7, Dusp1, Dusp16, Dusp4, Edn1, Epha4, Ercc6, Frs2, Ghr, Igf1r, Il6, Insr, Map3k1, Mdfi, Nlrc5, Pak1, Pdgfb, Ppm1f, Prlr, Rb1, Spred3, Tab2, Tgfbr1, Thbs1, Tnfaip3, Tnik, Trib1, Tsc1, Vav3 | mmu-let-7a, mmu-let-7b, mmu-let-7c, mmu-let-7e, mmu-let-7f, mmu-miR-98 |

|            |                                                            |                                                                                                                                                      |                                                                        |
|------------|------------------------------------------------------------|------------------------------------------------------------------------------------------------------------------------------------------------------|------------------------------------------------------------------------|
| GO:0051345 | positive regulation of hydrolase activity                  | Akap6, Arhgap20, Arhgap28, Arhgef15, Ccr7, Dlc1, Edn1, Fasl, Gipc1, Hip1, Mapk8, P2rx1, Plekhg6, Ppargc1b, Ppm1f, Rgs16, Rnf7, Srgap3, Stard13, Tsc1 | mmu-let-7a, mmu-let-7b, mmu-let-7c, mmu-let-7e, mmu-let-7f, mmu-miR-98 |
| GO:0051389 | inactivation of MAPKK activity                             | Igf1r                                                                                                                                                | mmu-let-7a, mmu-let-7b, mmu-let-7c, mmu-let-7e, mmu-let-7f, mmu-miR-98 |
| GO:0051402 | neuron apoptosis                                           | Bcl2l1, Braf, Casp3, EglN2, Esr2, Fasl, Ghr, Grik2, Il6, Ngf, Ppara, Ppargc1a, Rb1                                                                   | mmu-let-7a, mmu-let-7b, mmu-let-7c, mmu-let-7e, mmu-let-7f, mmu-miR-98 |
| GO:0051403 | stress-activated MAPK cascade                              | Ccr7, Dusp22, Edn1, Epha4, Ercc6, Grik2, Igf1r, Map3k1, Map4k4, Mapk8, Mdfi, Pak1, Sema4c, Taok1, Tnik, Trib1                                        | mmu-let-7a, mmu-let-7b, mmu-let-7c, mmu-let-7e, mmu-let-7f, mmu-miR-98 |
| GO:0051492 | regulation of stress fiber assembly                        | Dlc1, Pak1, Ppm1f, Tsc1                                                                                                                              | mmu-let-7a, mmu-let-7b, mmu-let-7c, mmu-let-7e, mmu-let-7f, mmu-miR-98 |
| GO:0051495 | positive regulation of cytoskeleton organization           | Edn1, Map3k1, Mapk8, Pak1, Ppm1f, Rictor, Wasl                                                                                                       | mmu-let-7a, mmu-let-7b, mmu-let-7c, mmu-let-7e, mmu-let-7f, mmu-miR-98 |
| GO:0051603 | proteolysis involved in cellular protein catabolic process | Fbxl12, Fbxl14, Map3k1, Rnf20, Uhrf2, Usp12, Usp24, Usp38, Usp47, Wnt1                                                                               | mmu-let-7a, mmu-let-7b, mmu-let-7c, mmu-let-7e, mmu-let-7f, mmu-miR-98 |
| GO:0051701 | interaction with host                                      | Bcl2l1, Insr, Thoc1, Thoc2                                                                                                                           | mmu-let-7a, mmu-let-7b, mmu-let-7c, mmu-let-7e, mmu-let-7f, mmu-miR-98 |
| GO:0051783 | regulation of nuclear division                             | Edn1, Insr, Nme6, Pdgfb, Rb1                                                                                                                         | mmu-let-7a, mmu-let-7b, mmu-let-7c, mmu-let-7e, mmu-let-7f, mmu-miR-98 |
| GO:0051894 | positive regulation of focal adhesion assembly             | Ppm1f, Tsc1                                                                                                                                          | mmu-let-7a, mmu-let-7b, mmu-let-7c, mmu-let-7e, mmu-let-7f, mmu-miR-98 |

|            |                                                           |                                                                                                                                            |                                                                        |
|------------|-----------------------------------------------------------|--------------------------------------------------------------------------------------------------------------------------------------------|------------------------------------------------------------------------|
| GO:0051897 | positive regulation of protein kinase B signaling cascade | Al464131, Igf1r, Il6, Insr, Rictor, Tgfbr1, Thbs1                                                                                          | mmu-let-7a, mmu-let-7b, mmu-let-7c, mmu-let-7e, mmu-let-7f, mmu-miR-98 |
| GO:0051899 | membrane depolarization                                   | Adrb2, Edn1, Grik2, Grin2b, Scn5a                                                                                                          | mmu-let-7a, mmu-let-7b, mmu-let-7c, mmu-let-7e, mmu-let-7f, mmu-miR-98 |
| GO:0051917 | regulation of fibrinolysis                                | Klkb1, Thbs1                                                                                                                               | mmu-let-7a, mmu-let-7b, mmu-let-7c, mmu-let-7e, mmu-let-7f, mmu-miR-98 |
| GO:0051930 | regulation of sensory perception of pain                  | Adrb2, Edn1, Il10, Mgl1                                                                                                                    | mmu-let-7a, mmu-let-7b, mmu-let-7c, mmu-let-7e, mmu-let-7f, mmu-miR-98 |
| GO:0051939 | gamma-aminobutyric acid import                            | Slc6a1                                                                                                                                     | mmu-let-7a, mmu-let-7b, mmu-let-7c, mmu-let-7e, mmu-let-7f, mmu-miR-98 |
| GO:0051960 | regulation of nervous system development                  | Arhgef15, Chrd, Epha3, Epha4, Ezh2, Gdf6, Hmga2, Il6, Lin28a, Lingo1, Lmx1a, Mycn, Nefm, Ngf, Ntn1, Pbx1, Ruffy3, Sema4f, Skil, Tnik, Ulk2 | mmu-let-7a, mmu-let-7b, mmu-let-7c, mmu-let-7e, mmu-let-7f, mmu-miR-98 |
| GO:0051970 | negative regulation of transmission of nerve impulse      | Grid2ip, Grik2, Mgl1, Slc6a1                                                                                                               | mmu-let-7a, mmu-let-7b, mmu-let-7c, mmu-let-7e, mmu-let-7f, mmu-miR-98 |
| GO:0060011 | Sertoli cell proliferation                                | Acvr2a, Esr2                                                                                                                               | mmu-let-7a, mmu-let-7b, mmu-let-7c, mmu-let-7e, mmu-let-7f, mmu-miR-98 |
| GO:0060070 | canonical Wnt receptor signaling pathway                  | Ccnd1, Ccny, Dkk3, Eda, Lgr4, Nphp3, Ptpu, Rspo2, Tcf7l1, Wnt1, Wnt9a, Wnt9b                                                               | mmu-let-7a, mmu-let-7b, mmu-let-7c, mmu-let-7e, mmu-let-7f, mmu-miR-98 |
| GO:0060173 | limb development                                          | Fgf4, Mycn, Pbx1, Pbx2, Prrx1, Rdh10, Rspo2, Sall3, Sall4, Tbx5, Wnt9a, Zbtb16                                                             | mmu-let-7a, mmu-let-7b, mmu-let-7c, mmu-let-7e, mmu-let-7f, mmu-miR-98 |

|            |                                                                     |                                                                                                                                                                                        |                                                                        |
|------------|---------------------------------------------------------------------|----------------------------------------------------------------------------------------------------------------------------------------------------------------------------------------|------------------------------------------------------------------------|
| GO:0060178 | regulation of exocyst localization                                  | Ralb                                                                                                                                                                                   | mmu-let-7a, mmu-let-7b, mmu-let-7c, mmu-let-7e, mmu-let-7f, mmu-miR-98 |
| GO:0060255 | regulation of macromolecule metabolic process                       | Casp3, Ccny, Dlgap1, Dusp1, Dusp16, Dusp4, Epha4, Fnip1, Fnip2, Frs2, Ndst2, Prlr, Smarcd1, Socs1, Spred3, Tab2, Tnik, Ercc4                                                           | mmu-let-7a, mmu-let-7b, mmu-let-7c, mmu-let-7e, mmu-let-7f, mmu-miR-98 |
| GO:0060292 | long term synaptic depression                                       | Grid2ip, Mgl1                                                                                                                                                                          | mmu-let-7a, mmu-let-7b, mmu-let-7c, mmu-let-7e, mmu-let-7f, mmu-miR-98 |
| GO:0060339 | negative regulation of type I interferon-mediated signaling pathway | Nlrc5                                                                                                                                                                                  | mmu-let-7a, mmu-let-7b, mmu-let-7c, mmu-let-7e, mmu-let-7f, mmu-miR-98 |
| GO:0060445 | branching involved in salivary gland morphogenesis                  | Il6, Pdgfb, Plxnd1                                                                                                                                                                     | mmu-let-7a, mmu-let-7b, mmu-let-7c, mmu-let-7e, mmu-let-7f, mmu-miR-98 |
| GO:0060485 | mesenchyme development                                              | Edn1, Hand1, Hmga2, Nrtn, Rbpj, Rdh10, Tbx5, Tgfbr1, Tgfbr3                                                                                                                            | mmu-let-7a, mmu-let-7b, mmu-let-7c, mmu-let-7e, mmu-let-7f, mmu-miR-98 |
| GO:0060536 | cartilage morphogenesis                                             | Hand1, Rspo2                                                                                                                                                                           | mmu-let-7a, mmu-let-7b, mmu-let-7c, mmu-let-7e, mmu-let-7f, mmu-miR-98 |
| GO:0060537 | muscle tissue development                                           | Acta1, Adrb2, Al464131, Col4a1, Col4a5, Dmd, Foxp2, Hand1, Pak1, Rbm38, Skil, Tbx5, Tgfbr3, Tsc1, Utrn, Wnt1                                                                           | mmu-let-7a, mmu-let-7b, mmu-let-7c, mmu-let-7e, mmu-let-7f, mmu-miR-98 |
| GO:0060548 | negative regulation of cell death                                   | Apbb3, Bcl2l1, Braf, Casp3, Ccr7, Dusp1, Edn1, Esr2, Fgf4, Grik2, Hmga2, Igf1r, Il10, Il6, Mapk8, Ngf, Ppargc1a, Prkaa2, Qars, Rnf7, Taf9b, Tgfbr1, Thbs1, Tnfaip3, Usp47, Wnt1, Wnt9a | mmu-let-7a, mmu-let-7b, mmu-let-7c, mmu-let-7e, mmu-let-7f, mmu-miR-98 |
| GO:0060554 | induction of necroptosis of activated-T cells                       | Fasl                                                                                                                                                                                   | mmu-let-7a, mmu-let-7b, mmu-let-7c, mmu-let-7e, mmu-let-7f, mmu-miR-98 |



|            |                                                                                    |                                                                                 |                                                                        |
|------------|------------------------------------------------------------------------------------|---------------------------------------------------------------------------------|------------------------------------------------------------------------|
| GO:0060562 | epithelial tube morphogenesis                                                      | Dlc1, Hand1, Lgr4, Ntn1, Pbx1, Rdh10, Rspo2, Sall4, Sema4c, Tsc1, Wnt1, Wnt9b   | mmu-let-7a, mmu-let-7b, mmu-let-7c, mmu-let-7e, mmu-let-7f, mmu-miR-98 |
| GO:0060664 | epithelial cell proliferation involved in salivary gland morphogenesis             | Il6, Pdgfb                                                                      | mmu-let-7a, mmu-let-7b, mmu-let-7c, mmu-let-7e, mmu-let-7f, mmu-miR-98 |
| GO:0060707 | trophoblast giant cell differentiation                                             | Hand1, Mdfi                                                                     | mmu-let-7a, mmu-let-7b, mmu-let-7c, mmu-let-7e, mmu-let-7f, mmu-miR-98 |
| GO:0061025 | membrane fusion                                                                    | Eea1, Pldn, Smcr7l, Snap23, Stx3, Vav3                                          | mmu-let-7a, mmu-let-7b, mmu-let-7c, mmu-let-7e, mmu-let-7f, mmu-miR-98 |
| GO:0061138 | morphogenesis of a branching epithelium                                            | Edn1, Frs2, Il10, Lgr4, Pbx1, Rdh10, Rspo2, Wnt1, Wnt9b                         | mmu-let-7a, mmu-let-7b, mmu-let-7c, mmu-let-7e, mmu-let-7f, mmu-miR-98 |
| GO:0061387 | regulation of extent of cell growth                                                | Ngf, Ntn1, Sema4f, Ulk2                                                         | mmu-let-7a, mmu-let-7b, mmu-let-7c, mmu-let-7e, mmu-let-7f, mmu-miR-98 |
| GO:0061418 | regulation of transcription from RNA polymerase II promoter in response to hypoxia | Bach1                                                                           | mmu-let-7a, mmu-let-7b, mmu-let-7c, mmu-let-7e, mmu-let-7f, mmu-miR-98 |
| GO:0070085 | glycosylation                                                                      | Acer2, B3galt1, B3gnt7, Galnt1, Galnt2, Gxylt1, Slc35c1, St6gal1, St8sia1, Ugg1 | mmu-let-7a, mmu-let-7b, mmu-let-7c, mmu-let-7e, mmu-let-7f, mmu-miR-98 |
| GO:0070208 | protein heterotrimerization                                                        | Col1a2, Skil                                                                    | mmu-let-7a, mmu-let-7b, mmu-let-7c, mmu-let-7e, mmu-let-7f, mmu-miR-98 |

|            |                                                                                                 |                                                                                                                                                                                                               |                                                                        |
|------------|-------------------------------------------------------------------------------------------------|---------------------------------------------------------------------------------------------------------------------------------------------------------------------------------------------------------------|------------------------------------------------------------------------|
| GO:0070302 | regulation of stress-activated protein kinase signaling cascade                                 | Ccr7, Dusp22, Edn1, Epha4, Ercc6, Grik2, Igf1r, Map3k1, Map4k4, Mdfi, Pak1, Sema4c, Taok1                                                                                                                     | mmu-let-7a, mmu-let-7b, mmu-let-7c, mmu-let-7e, mmu-let-7f, mmu-miR-98 |
| GO:0070429 | negative regulation of nucleotide-binding oligomerization domain containing 1 signaling pathway | Tnfaip3                                                                                                                                                                                                       | mmu-let-7a, mmu-let-7b, mmu-let-7c, mmu-let-7e, mmu-let-7f, mmu-miR-98 |
| GO:0070433 | negative regulation of nucleotide-binding oligomerization domain containing 2 signaling pathway | Tnfaip3                                                                                                                                                                                                       | mmu-let-7a, mmu-let-7b, mmu-let-7c, mmu-let-7e, mmu-let-7f, mmu-miR-98 |
| GO:0070536 | protein K63-linked deubiquitination                                                             | Tnfaip3, Yod1                                                                                                                                                                                                 | mmu-let-7a, mmu-let-7b, mmu-let-7c, mmu-let-7e, mmu-let-7f, mmu-miR-98 |
| GO:0070647 | protein modification by small protein conjugation or removal                                    | 1810074P20Rik, Cdc34, Fbxl14, Fbxo30, Khlh9, Map3k1, Rnf20, Rnf7, Senp2, Socs7, Tgfb1, Tnfaip3, Trib1, Trib2, Trim33, Uhrf2, Usp12, Usp47, Wnt1, Yod1                                                         | mmu-let-7a, mmu-let-7b, mmu-let-7c, mmu-let-7e, mmu-let-7f, mmu-miR-98 |
| GO:0070663 | regulation of leukocyte proliferation                                                           | Casp3, Ccr7, Cd276, Cd86, Il10, Il13, Il6, Prdm1, Vav3                                                                                                                                                        | mmu-let-7a, mmu-let-7b, mmu-let-7c, mmu-let-7e, mmu-let-7f, mmu-miR-98 |
| GO:0070828 | heterochromatin organization                                                                    | Hmga1, Hmga2                                                                                                                                                                                                  | mmu-let-7a, mmu-let-7b, mmu-let-7c, mmu-let-7e, mmu-let-7f, mmu-miR-98 |
| GO:0070918 | production of small RNA involved in gene silencing by RNA                                       | Lin28a, Lin28b, Tarbp2                                                                                                                                                                                        | mmu-let-7a, mmu-let-7b, mmu-let-7c, mmu-let-7e, mmu-let-7f, mmu-miR-98 |
| GO:0071310 | cellular response to organic substance                                                          | Adipor2, Aqp4, Bcl2l1, Cask, Casp3, Col1a2, Col3a1, Col4a1, Col5a2, Esr2, Fgf4, Fgf5, Frs2, Ghr, Il13, Il6, Insr, Nr6a1, Osmr, Pak1, Pdgfb, Ppara, Prlr, Rorc, Smarcc1, Socs1, Socs7, Thbs1, Tnfrsf1b, Trim71 | mmu-let-7a, mmu-let-7b, mmu-let-7c, mmu-let-7e, mmu-let-7f, mmu-miR-98 |

|            |                                                   |                                                                                                                                                                    |                                                                        |
|------------|---------------------------------------------------|--------------------------------------------------------------------------------------------------------------------------------------------------------------------|------------------------------------------------------------------------|
| GO:0071359 | cellular response to dsRNA                        | Lin28a, Lin28b, Tarbp2                                                                                                                                             | mmu-let-7a, mmu-let-7b, mmu-let-7c, mmu-let-7e, mmu-let-7f, mmu-miR-98 |
| GO:0071425 | hemopoietic stem cell proliferation               | Nkap, Wnt1                                                                                                                                                         | mmu-let-7a, mmu-let-7b, mmu-let-7c, mmu-let-7e, mmu-let-7f, mmu-miR-98 |
| GO:0071478 | cellular response to radiation                    | Bcat1, Bcl2l1, Cdc25a, Hmga2, Usp47                                                                                                                                | mmu-let-7a, mmu-let-7b, mmu-let-7c, mmu-let-7e, mmu-let-7f, mmu-miR-98 |
| GO:0071495 | cellular response to endogenous stimulus          | Adipor2, Bcl2l1, Col1a2, Col3a1, Col4a1, Col5a2, Esr2, Fgf4, Fgf5, Frs2, Ghr, Insr, Nr6a1, Pak1, Pdgfb, Ppara, Rorc, Smarcc1, Socs1, Socs7, Thbs1                  | mmu-let-7a, mmu-let-7b, mmu-let-7c, mmu-let-7e, mmu-let-7f, mmu-miR-98 |
| GO:0071580 | regulation of zinc ion transmembrane transport    | Slc30a1                                                                                                                                                            | mmu-let-7a, mmu-let-7b, mmu-let-7c, mmu-let-7e, mmu-let-7f, mmu-miR-98 |
| GO:0071582 | negative regulation of zinc ion transport         | Slc30a1                                                                                                                                                            | mmu-let-7a, mmu-let-7b, mmu-let-7c, mmu-let-7e, mmu-let-7f, mmu-miR-98 |
| GO:0071584 | negative regulation of zinc ion import            | Slc30a1                                                                                                                                                            | mmu-let-7a, mmu-let-7b, mmu-let-7c, mmu-let-7e, mmu-let-7f, mmu-miR-98 |
| GO:0071774 | response to fibroblast growth factor stimulus     | Fgf4, Fgf5, Frs2, Pdgfb, Thbs1                                                                                                                                     | mmu-let-7a, mmu-let-7b, mmu-let-7c, mmu-let-7e, mmu-let-7f, mmu-miR-98 |
| GO:0071779 | G1/S transition checkpoint                        | Bcat1, Ccnd1, Rbm38, Wnt9a                                                                                                                                         | mmu-let-7a, mmu-let-7b, mmu-let-7c, mmu-let-7e, mmu-let-7f, mmu-miR-98 |
| GO:0071780 | mitotic cell cycle G2/M transition checkpoint     | Bcl2l1, Hmga2                                                                                                                                                      | mmu-let-7a, mmu-let-7b, mmu-let-7c, mmu-let-7e, mmu-let-7f, mmu-miR-98 |
| GO:0071842 | cellular component organization at cellular level | Adamts14, Col1a2, Col3a1, Col5a2, Dmd, Dmp1, Epha4, Igf1r, Il6, Lingo1, Lmx1a, Ngf, Nrtn, Ntn1, Pla2g3, Pxdn, Rab8b, Rufy3, Sema4f, Skil, Spnb4, Stx3, Ulk2, Unc5a | mmu-let-7a, mmu-let-7b, mmu-let-7c, mmu-let-7e, mmu-let-7f, mmu-miR-98 |

|            |                                                                    |                                                                                                                                                                                                                              |                                                                        |
|------------|--------------------------------------------------------------------|------------------------------------------------------------------------------------------------------------------------------------------------------------------------------------------------------------------------------|------------------------------------------------------------------------|
| GO:0071844 | cellular component assembly at cellular level                      | Acta1, Acvr1c, Ahctf1, Atg16l1, Atg4b, Bin3, Ccr7, Clp1, Dlgap1, Edn1, Epha3, Hip1, Hmga1, Hmga2, Iqcb1, Limd1, Mapk8, Nap1l1, Nefm, Pdgfb, Pogz, Prlr, Ralb, Rdx, Rictor, Tarbp2, Tgfbr1, Tgfbr3, Tmem231, Vav3, Wasl, Wnt1 | mmu-let-7a, mmu-let-7b, mmu-let-7c, mmu-let-7e, mmu-let-7f, mmu-miR-98 |
| GO:0071875 | adrenergic receptor signaling pathway                              | Adrb2, Adrb3                                                                                                                                                                                                                 | mmu-let-7a, mmu-let-7b, mmu-let-7c, mmu-let-7e, mmu-let-7f, mmu-miR-98 |
| GO:0071901 | negative regulation of protein serine/threonine kinase activity    | Casp3, Dusp1, Dusp16, Dusp4, Spred3, Tnfaip3                                                                                                                                                                                 | mmu-let-7a, mmu-let-7b, mmu-let-7c, mmu-let-7e, mmu-let-7f, mmu-miR-98 |
| GO:0071902 | positive regulation of protein serine/threonine kinase activity    | Ccr7, Edn1, Epha4, Ercc6, Frs2, Ghr, Insr, Map3k1, Mdfi, Pak1, Thbs1                                                                                                                                                         | mmu-let-7a, mmu-let-7b, mmu-let-7c, mmu-let-7e, mmu-let-7f, mmu-miR-98 |
| GO:0072003 | kidney rudiment formation                                          | Wnt9b                                                                                                                                                                                                                        | mmu-let-7a, mmu-let-7b, mmu-let-7c, mmu-let-7e, mmu-let-7f, mmu-miR-98 |
| GO:0072046 | establishment of planar polarity involved in nephron morphogenesis | Wnt9b                                                                                                                                                                                                                        | mmu-let-7a, mmu-let-7b, mmu-let-7c, mmu-let-7e, mmu-let-7f, mmu-miR-98 |
| GO:0072170 | metanephric tubule development                                     | Lgr4, Wnt9b                                                                                                                                                                                                                  | mmu-let-7a, mmu-let-7b, mmu-let-7c, mmu-let-7e, mmu-let-7f, mmu-miR-98 |
| GO:0072209 | metanephric mesangial cell differentiation                         | Pdgfb                                                                                                                                                                                                                        | mmu-let-7a, mmu-let-7b, mmu-let-7c, mmu-let-7e, mmu-let-7f, mmu-miR-98 |
| GO:0072210 | metanephric nephron development                                    | Lgr4, Pdgfb, Wnt9b                                                                                                                                                                                                           | mmu-let-7a, mmu-let-7b, mmu-let-7c, mmu-let-7e, mmu-let-7f, mmu-miR-98 |

|            |                                                                                                                         |                                                                                                                                                                                                                         |                                                                        |
|------------|-------------------------------------------------------------------------------------------------------------------------|-------------------------------------------------------------------------------------------------------------------------------------------------------------------------------------------------------------------------|------------------------------------------------------------------------|
| GO:0072255 | metanephric glomerular mesangial cell development                                                                       | Pdgfb                                                                                                                                                                                                                   | mmu-let-7a, mmu-let-7b, mmu-let-7c, mmu-let-7e, mmu-let-7f, mmu-miR-98 |
| GO:0072363 | regulation of glycolysis by positive regulation of transcription from RNA polymerase II promoter                        | Ppara                                                                                                                                                                                                                   | mmu-let-7a, mmu-let-7b, mmu-let-7c, mmu-let-7e, mmu-miR-98             |
| GO:0072366 | regulation of cellular ketone metabolic process by positive regulation of transcription from RNA polymerase II promoter | Ppara                                                                                                                                                                                                                   | mmu-let-7a, mmu-let-7b, mmu-let-7c, mmu-let-7e, mmu-miR-98             |
| GO:0072367 | regulation of lipid transport by regulation of transcription from RNA polymerase II promoter                            | Ppara, Srebf2                                                                                                                                                                                                           | mmu-let-7a, mmu-let-7b, mmu-let-7c, mmu-let-7e, mmu-let-7f, mmu-miR-98 |
| GO:0072523 | purine-containing compound catabolic process                                                                            | Abcb9, Abcc10, Abcg1, Arhgap20, Arhgap28, Arhgef15, Ccr7, Chd4, Crk, Ddx19a, Dhx57, Dlc1, Epha3, Epha4, Ercc6, Gipc1, Gnal, Lonrf3, Nkiras2, Plekhg6, Ralb, Rasl10b, Rgs16, Rictor, Srgap3, Stard13, Trank1, Tsc1, Vav3 | mmu-let-7a, mmu-let-7b, mmu-let-7c, mmu-let-7e, mmu-let-7f, mmu-miR-98 |
| GO:0072573 | tolerance induction to lipopolysaccharide                                                                               | Tnfaip3                                                                                                                                                                                                                 | mmu-let-7a, mmu-let-7b, mmu-let-7c, mmu-let-7e, mmu-let-7f, mmu-miR-98 |
| GO:0072610 | interleukin-12 secretion                                                                                                | Ccr7                                                                                                                                                                                                                    | mmu-let-7a, mmu-let-7b, mmu-let-7c, mmu-let-7e, mmu-let-7f, mmu-miR-98 |

|            |                                                                                        |                                                                                                                                          |                                                                        |
|------------|----------------------------------------------------------------------------------------|------------------------------------------------------------------------------------------------------------------------------------------|------------------------------------------------------------------------|
| GO:0080134 | regulation of response to stress                                                       | Cask, Dusp22, Edn1, Epha4, Ercc6, Grik2, Hic1, Hmga1, Hmga2, Igf1r, Klkb1, Map3k1, Map4k4, Mdfi, Pak1, Pdgfb, Sema4c, Taok1, Thbs1, Wnt1 | mmu-let-7a, mmu-let-7b, mmu-let-7c, mmu-let-7e, mmu-let-7f, mmu-miR-98 |
| GO:0090077 | foam cell differentiation                                                              | Abcg1, Msr1, Ppara                                                                                                                       | mmu-let-7a, mmu-let-7b, mmu-let-7c, mmu-let-7e, mmu-let-7f, mmu-miR-98 |
| GO:0090092 | regulation of transmembrane receptor protein serine/threonine kinase signaling pathway | Acvr1b, Acvr2a, Chrd, Gdf6, Gipc1, Peg10, Skil, Tgfbr1, Tgfbr3, Thbs1, Trim33, Wnt1                                                      | mmu-let-7a, mmu-let-7b, mmu-let-7c, mmu-let-7e, mmu-let-7f, mmu-miR-98 |
| GO:0090104 | pancreatic E cell differentiation                                                      | Rfx6                                                                                                                                     | mmu-let-7a, mmu-let-7b, mmu-let-7c, mmu-let-7e, mmu-let-7f, mmu-miR-98 |
| GO:0090109 | regulation of cell-substrate junction assembly                                         | Epha3, Ppm1f, Tsc1                                                                                                                       | mmu-let-7a, mmu-let-7b, mmu-let-7c, mmu-let-7e, mmu-let-7f, mmu-miR-98 |
| GO:0090285 | negative regulation of protein glycosylation in Golgi                                  | Acer2                                                                                                                                    | mmu-let-7a, mmu-let-7b, mmu-let-7c, mmu-let-7e, mmu-let-7f, mmu-miR-98 |
| GO:0090342 | regulation of cell aging                                                               | Hmga1, Hmga2, Wnt1                                                                                                                       | mmu-let-7a, mmu-let-7b, mmu-let-7c, mmu-let-7e, mmu-let-7f, mmu-miR-98 |
| GO:0090402 | oncogene-induced senescence                                                            | Hmga1, Hmga2                                                                                                                             | mmu-let-7a, mmu-let-7b, mmu-let-7c, mmu-let-7e, mmu-let-7f, mmu-miR-98 |
| GO:0097022 | lymphocyte migration into lymph node                                                   | Ccr7                                                                                                                                     | mmu-let-7a, mmu-let-7b, mmu-let-7c, mmu-let-7e, mmu-let-7f, mmu-miR-98 |

|            |                                                               |                                                                                                                                                                                                                                                   |                                                                        |
|------------|---------------------------------------------------------------|---------------------------------------------------------------------------------------------------------------------------------------------------------------------------------------------------------------------------------------------------|------------------------------------------------------------------------|
| GO:0097026 | dendritic cell dendrite assembly                              | Ccr7                                                                                                                                                                                                                                              | mmu-let-7a, mmu-let-7b, mmu-let-7c, mmu-let-7e, mmu-let-7f, mmu-miR-98 |
| GO:2000002 | negative regulation of DNA damage checkpoint                  | Wnt1                                                                                                                                                                                                                                              | mmu-let-7a, mmu-let-7b, mmu-let-7c, mmu-let-7e, mmu-let-7f, mmu-miR-98 |
| GO:2000026 | regulation of multicellular organismal development            | Acvr1b, Acvr2a, Adrb2, Ccnd1, Ccr7, Cd276, Cd86, Col4a2, Edn1, Fasl, Foxp2, Frs2, Gtf2i, Insr, Lgr4, Mapk8, Nkap, Pdgfb, Plxnd1, Ppargc1b, Prdm1, Prlr, Rb1, Rbm38, Tbx5, Tgfbr1, Tgfbr3, Thbs1, Tnfaip3, Tob2, Vash2, Wnt1, Wnt9a, Wnt9b, Zbtb16 | mmu-let-7a, mmu-let-7b, mmu-let-7c, mmu-let-7e, mmu-let-7f, mmu-miR-98 |
| GO:2000036 | regulation of stem cell maintenance                           | Hmga2, Tcf7l1                                                                                                                                                                                                                                     | mmu-let-7a, mmu-let-7b, mmu-let-7c, mmu-let-7e, mmu-let-7f, mmu-miR-98 |
| GO:2000045 | regulation of G1/S transition of mitotic cell cycle           | Bcat1, Ccnd1, Rbm38, Wnt9a                                                                                                                                                                                                                        | mmu-let-7a, mmu-let-7b, mmu-let-7c, mmu-let-7e, mmu-let-7f, mmu-miR-98 |
| GO:2000116 | regulation of cysteine-type endopeptidase activity            | Bcl2l1, Il6, Thbs1, Tnfaip3, Usp47, Wnt9a                                                                                                                                                                                                         | mmu-let-7a, mmu-let-7b, mmu-let-7c, mmu-let-7e, mmu-let-7f, mmu-miR-98 |
| GO:2000145 | regulation of cell motility                                   | Abi3, Ccr7, Chrd, Dlc1, Edn1, Igf1r, Insr, Map3k1, Mapk8, Myo1f, Ntn1, Pdgfb, Plxnd1, Ppm1f, Ptpu, Rnf20, Tbx5, Tgfbr3, Thbs1, Trib1                                                                                                              | mmu-let-7a, mmu-let-7b, mmu-let-7c, mmu-let-7e, mmu-let-7f, mmu-miR-98 |
| GO:2000231 | positive regulation of pancreatic stellate cell proliferation | Il13                                                                                                                                                                                                                                              | mmu-let-7a, mmu-let-7b, mmu-let-7c, mmu-let-7e, mmu-let-7f, mmu-miR-98 |
| GO:2000349 | negative regulation of CD40 signaling pathway                 | Tnfaip3                                                                                                                                                                                                                                           | mmu-let-7a, mmu-let-7b, mmu-let-7c, mmu-let-7e, mmu-let-7f, mmu-miR-98 |

|            |                                                                                 |                                      |                                                                        |
|------------|---------------------------------------------------------------------------------|--------------------------------------|------------------------------------------------------------------------|
| GO:2000377 | regulation of reactive oxygen species metabolic process                         | Insr, Mycn, Pdgfb, Thbs1             | mmu-let-7a, mmu-let-7b, mmu-let-7c, mmu-let-7e, mmu-let-7f, mmu-miR-98 |
| GO:2000602 | regulation of interphase of mitotic cell cycle                                  | Bcl2l1, Dcun1d3, Hmga2, Rb1, Usp47   | mmu-let-7a, mmu-let-7b, mmu-let-7c, mmu-let-7e, mmu-let-7f, mmu-miR-98 |
| GO:2000648 | positive regulation of stem cell proliferation                                  | Hmga2, Ngf                           | mmu-let-7a, mmu-let-7b, mmu-let-7c, mmu-let-7e, mmu-let-7f, mmu-miR-98 |
| GO:2000677 | regulation of transcription regulatory region DNA binding                       | Dot1l, Hmga2, Ppara                  | mmu-let-7a, mmu-let-7b, mmu-let-7c, mmu-let-7e, mmu-let-7f, mmu-miR-98 |
| GO:2000685 | positive regulation of cellular response to X-ray                               | Hmga2                                | mmu-let-7a, mmu-let-7b, mmu-let-7c, mmu-let-7e, mmu-let-7f, mmu-miR-98 |
| GO:2000774 | positive regulation of cellular senescence                                      | Hmga1, Hmga2                         | mmu-let-7a, mmu-let-7b, mmu-let-7c, mmu-let-7e, mmu-let-7f, mmu-miR-98 |
| GO:2000812 | regulation of barbed-end actin filament capping                                 | Mtpn                                 | mmu-let-7a, mmu-let-7b, mmu-let-7c, mmu-let-7e, mmu-let-7f, mmu-miR-98 |
| GO:2001033 | negative regulation of double-strand break repair via nonhomologous end joining | Hmga2                                | mmu-let-7a, mmu-let-7b, mmu-let-7c, mmu-let-7e, mmu-let-7f, mmu-miR-98 |
| GO:2001056 | positive regulation of cysteine-type endopeptidase activity                     | Dlc1, Fasl, Hip1, P2rx1, Ppm1f, Rnf7 | mmu-let-7a, mmu-let-7b, mmu-let-7c, mmu-let-7e, mmu-let-7f, mmu-miR-98 |



|                                   |                                                                       |                                                                                                                                                                                                                                                     |                                                                        |
|-----------------------------------|-----------------------------------------------------------------------|-----------------------------------------------------------------------------------------------------------------------------------------------------------------------------------------------------------------------------------------------------|------------------------------------------------------------------------|
| GO:2001108                        | positive regulation of Rho guanyl-nucleotide exchange factor activity | Epha4                                                                                                                                                                                                                                               | mmu-let-7a, mmu-let-7b, mmu-let-7c, mmu-let-7e, mmu-let-7f, mmu-miR-98 |
|                                   |                                                                       |                                                                                                                                                                                                                                                     |                                                                        |
|                                   |                                                                       |                                                                                                                                                                                                                                                     |                                                                        |
|                                   |                                                                       |                                                                                                                                                                                                                                                     |                                                                        |
| <b>GO ID (molecular function)</b> | <b>Go Term (molecular function GO Term)</b>                           | <b>Gene Symbol (genes enriched by up-regulated miRNAs)</b>                                                                                                                                                                                          | <b>Up-regulated miRNAs</b>                                             |
| GO:0001047                        | core promoter binding                                                 | E2f2, Esr2, Ezh2, Hmga2, Nlrc5, Rb1, Rbpj                                                                                                                                                                                                           | mmu-let-7a, mmu-let-7b, mmu-let-7c, mmu-let-7e, mmu-let-7f, mmu-miR-98 |
| GO:0003676                        | nucleic acid binding                                                  | Aen, Cpeb3, Cpsf4, Ddx19a, Dhx57, Dpf2, Eif2c4, Eif4g2, Gpatch2, Gpatch3, Hd1bp, Igf2bp2, Igf2bp3, Lsm11, Nova1, Nynrin, Ppargc1b, Qars, Rbm38, Rbms2, Rpusd2, Rpusd3, Strbp, Syncrip, Tarbp2, Thoc2, Tia1, Xpot, Zc3h3, Zc3hav1, Zfp740            | mmu-let-7a, mmu-let-7b, mmu-let-7c, mmu-let-7e, mmu-let-7f, mmu-miR-98 |
| GO:0003682                        | chromatin binding                                                     | Cbx2, Cbx5, Ercc6, Ezh2, Foxp2, Hmga2, Nkap, Pbx2, Phf8, Prkaa2, Rbpj, Skil, Smarcc1, Srebf2, Suv39h2, Tcf7l1                                                                                                                                       | mmu-let-7a, mmu-let-7b, mmu-let-7c, mmu-let-7e, mmu-let-7f, mmu-miR-98 |
| GO:0003700                        | sequence-specific DNA binding transcription factor activity           | Ahctf1, Arid3a, Bach1, E2f2, E2f5, E2f6, Esr2, Foxp2, Gabpa, Hic1, Hif3a, Hlf, Hmga1, Hmga2, Lcor, Lmx1a, Meis2, Meis3, Mycn, Nr6a1, Onecut3, Pbx1, Pbx2, Pbx3, Ppara, Prrx1, Rbpj, Rorc, Srebf2, Tbx5, Tcf7l1, Tead3, Tead4, Zbtb16, Zfp354a, Elf4 | mmu-let-7a, mmu-let-7b, mmu-let-7c, mmu-let-7e, mmu-let-7f, mmu-miR-98 |
| GO:0003730                        | mRNA 3'-UTR binding                                                   | Igf2bp2, Igf2bp3, Khshrp, Rbm38                                                                                                                                                                                                                     | mmu-let-7a, mmu-let-7b, mmu-let-7c, mmu-let-7e, mmu-let-7f, mmu-miR-98 |
| GO:0003906                        | DNA-(apurinic or apyrimidinic site) lyase activity                    | Hmga1, Hmga2                                                                                                                                                                                                                                        | mmu-let-7a, mmu-let-7b, mmu-let-7c, mmu-let-7e, mmu-let-7f, mmu-miR-98 |

|            |                                                                |                                                           |                                                                        |
|------------|----------------------------------------------------------------|-----------------------------------------------------------|------------------------------------------------------------------------|
| GO:0003978 | UDP-glucose 4-epimerase activity                               | Gale                                                      | mmu-let-7a, mmu-let-7b, mmu-let-7c, mmu-let-7e, mmu-let-7f, mmu-miR-98 |
| GO:0003980 | UDP-glucose:glycoprotein glucosyltransferase activity          | Uggt1                                                     | mmu-let-7a, mmu-let-7b, mmu-let-7c, mmu-let-7e, mmu-let-7f, mmu-miR-98 |
| GO:0004149 | dihydrolipoyllysine-residue succinyltransferase activity       | Dlst                                                      | mmu-let-7a, mmu-let-7b, mmu-let-7c, mmu-let-7e, mmu-let-7f, mmu-miR-98 |
| GO:0004221 | ubiquitin thiolesterase activity                               | Tnfaip3, Usp12, Usp24, Usp32, Usp38, Usp47                | mmu-let-7a, mmu-let-7b, mmu-let-7c, mmu-let-7e, mmu-let-7f, mmu-miR-98 |
| GO:0004222 | metalloendopeptidase activity                                  | Adamts12, Adamts15, Adamts5, Adamts8, Lmln, Mbtps2, Mmp11 | mmu-let-7a, mmu-let-7b, mmu-let-7c, mmu-let-7e, mmu-let-7f, mmu-miR-98 |
| GO:0004305 | ethanolamine kinase activity                                   | Etnk1, Etnk2                                              | mmu-let-7a, mmu-let-7b, mmu-let-7c, mmu-let-7e, mmu-let-7f, mmu-miR-98 |
| GO:0004491 | methylmalonate-semialdehyde dehydrogenase (acylating) activity | Aldh6a1                                                   | mmu-let-7a, mmu-let-7b, mmu-let-7c, mmu-let-7e, mmu-let-7f, mmu-miR-98 |
| GO:0004550 | nucleoside diphosphate kinase activity                         | Nme4, Nme6                                                | mmu-let-7a, mmu-let-7b, mmu-let-7c, mmu-let-7e, mmu-let-7f, mmu-miR-98 |
| GO:0004571 | mannosyl-oligosaccharide 1,2-alpha-mannosidase activity        | Edem1, Edem3                                              | mmu-let-7a, mmu-let-7b, mmu-let-7c, mmu-let-7e, mmu-let-7f, mmu-miR-98 |
| GO:0004672 | protein kinase activity                                        | C230081A13Rik, Ccnd1, Frk, Ikbkap, Scyl3, Styk1, Trib2    | mmu-let-7a, mmu-let-7b, mmu-let-7c, mmu-let-7e, mmu-let-7f, mmu-miR-98 |

|            |                                                             |                                                                                                                                                |                                                                        |
|------------|-------------------------------------------------------------|------------------------------------------------------------------------------------------------------------------------------------------------|------------------------------------------------------------------------|
| GO:0004674 | protein serine/threonine kinase activity                    | Acvr1c, Cask, Dyrk1a, Hmga2, Limk2, Map4k3, Map4k4, Nek3, Obscn, Pak1, Riok3, Sbk1, Slk, Speg, Stk40, Taok1, Tgfbr1, Tgfbr3, Tnik, Trpm6, Ulk2 | mmu-let-7a, mmu-let-7b, mmu-let-7c, mmu-let-7e, mmu-let-7f, mmu-miR-98 |
| GO:0004679 | AMP-activated protein kinase activity                       | Prkaa2, Prkab2                                                                                                                                 | mmu-let-7a, mmu-let-7b, mmu-let-7c, mmu-let-7e, mmu-let-7f, mmu-miR-98 |
| GO:0004702 | receptor signaling protein serine/threonine kinase activity | Acvr1b, Acvr2a, Braf, Ikbke, Map3k1                                                                                                            | mmu-let-7a, mmu-let-7b, mmu-let-7c, mmu-let-7e, mmu-let-7f, mmu-miR-98 |
| GO:0004707 | MAP kinase activity                                         | Mapk11, Mapk6, Mapk8, Nlk                                                                                                                      | mmu-let-7a, mmu-let-7b, mmu-let-7c, mmu-let-7e, mmu-let-7f, mmu-miR-98 |
| GO:0004710 | MAPK/ERK kinase kinase activity                             | Map3k1                                                                                                                                         | mmu-let-7a, mmu-let-7b, mmu-let-7c, mmu-let-7e, mmu-let-7f, mmu-miR-98 |
| GO:0004715 | non-membrane spanning protein tyrosine kinase activity      | C230081A13Rik, Dyrk1a, Frk, Styk1                                                                                                              | mmu-let-7a, mmu-let-7b, mmu-let-7c, mmu-let-7e, mmu-let-7f, mmu-miR-98 |
| GO:0004721 | phosphoprotein phosphatase activity                         | Cdc25a, Dusp16, Dusp22, Pdp2, Ppm1f, Ppp2r2a, Pptc7, Ptprd, Ptpru                                                                              | mmu-let-7a, mmu-let-7b, mmu-let-7c, mmu-let-7e, mmu-let-7f, mmu-miR-98 |
| GO:0004736 | pyruvate carboxylase activity                               | Pcx                                                                                                                                            | mmu-let-7a, mmu-let-7b, mmu-let-7c, mmu-let-7e, mmu-let-7f, mmu-miR-98 |
| GO:0004819 | glutamine-tRNA ligase activity                              | Qars                                                                                                                                           | mmu-let-7a, mmu-let-7b, mmu-let-7c, mmu-let-7e, mmu-let-7f, mmu-miR-98 |
| GO:0004843 | ubiquitin-specific protease activity                        | Tnfaip3, Usp12, Usp47, Yod1                                                                                                                    | mmu-let-7a, mmu-let-7b, mmu-let-7c, mmu-let-7e, mmu-let-7f, mmu-miR-98 |

|            |                                                             |                                |                                                                        |
|------------|-------------------------------------------------------------|--------------------------------|------------------------------------------------------------------------|
| GO:0004903 | growth hormone receptor activity                            | Ghr                            | mmu-let-7a, mmu-let-7b, mmu-let-7c, mmu-let-7e, mmu-let-7f, mmu-miR-98 |
| GO:0004924 | oncostatin-M receptor activity                              | Osmr                           | mmu-let-7a, mmu-let-7b, mmu-let-7c, mmu-let-7e, mmu-let-7f, mmu-miR-98 |
| GO:0004925 | prolactin receptor activity                                 | Prlr                           | mmu-let-7a, mmu-let-7b, mmu-let-7c, mmu-let-7e, mmu-let-7f, mmu-miR-98 |
| GO:0004935 | adrenergic receptor activity                                | Adrb2, Adrb3                   | mmu-let-7a, mmu-let-7b, mmu-let-7c, mmu-let-7e, mmu-let-7f, mmu-miR-98 |
| GO:0004941 | beta2-adrenergic receptor activity                          | Adrb2                          | mmu-let-7a, mmu-let-7b, mmu-let-7c, mmu-let-7e, mmu-let-7f, mmu-miR-98 |
| GO:0005004 | GPI-linked ephrin receptor activity                         | Epha3, Epha4                   | mmu-let-7a, mmu-let-7b, mmu-let-7c, mmu-let-7e, mmu-let-7f, mmu-miR-98 |
| GO:0005024 | transforming growth factor beta-activated receptor activity | Acvr1b, Acvr1c, Acvr2a, Tgfbr1 | mmu-let-7a, mmu-let-7b, mmu-let-7c, mmu-let-7e, mmu-let-7f, mmu-miR-98 |
| GO:0005104 | fibroblast growth factor receptor binding                   | Fgf4, Fgf5, Frs2               | mmu-let-7a, mmu-let-7b, mmu-let-7c, mmu-let-7e, mmu-let-7f, mmu-miR-98 |
| GO:0005114 | type II transforming growth factor beta receptor binding    | Tgfbr1, Tgfbr3                 | mmu-let-7a, mmu-let-7b, mmu-let-7c, mmu-let-7e, mmu-let-7f, mmu-miR-98 |
| GO:0005141 | interleukin-10 receptor binding                             | Il10                           | mmu-let-7a, mmu-let-7b, mmu-let-7c, mmu-let-7e, mmu-let-7f, mmu-miR-98 |

|            |                                             |                                                                                                                                                              |                                                                        |
|------------|---------------------------------------------|--------------------------------------------------------------------------------------------------------------------------------------------------------------|------------------------------------------------------------------------|
| GO:0005144 | interleukin-13 receptor binding             | Il13                                                                                                                                                         | mmu-let-7a, mmu-let-7b, mmu-let-7c, mmu-let-7e, mmu-let-7f, mmu-miR-98 |
| GO:0005163 | nerve growth factor receptor binding        | Ngf                                                                                                                                                          | mmu-let-7a, mmu-let-7b, mmu-let-7c, mmu-let-7e, mmu-let-7f, mmu-miR-98 |
| GO:0005201 | extracellular matrix structural constituent | Col1a2, Col24a1, Col27a1, Col3a1, Col4a1, Col4a2, Col5a2, Pxdn                                                                                               | mmu-let-7a, mmu-let-7b, mmu-let-7c, mmu-let-7e, mmu-let-7f, mmu-miR-98 |
| GO:0005248 | voltage-gated sodium channel activity       | Scn11a, Scn4b, Scn5a, Scn8a                                                                                                                                  | mmu-let-7a, mmu-let-7b, mmu-let-7c, mmu-let-7e, mmu-let-7f, mmu-miR-98 |
| GO:0005261 | cation channel activity                     | Cacna1d, Grin2b, Kcnc3, Kcnc4, Kcnk18, Kctd21, P2rx1, Scn11a, Scn4b, Scn5a, Scn8a, Trpc7, Trpm6                                                              | mmu-let-7a, mmu-let-7b, mmu-let-7c, mmu-let-7e, mmu-let-7f, mmu-miR-98 |
| GO:0005539 | glycosaminoglycan binding                   | Adamts8, Chrd, Gns, Habp4, Impg2, Liph, Rspo2, Tgfbr3, Thbs1                                                                                                 | mmu-let-7a, mmu-let-7b, mmu-let-7c, mmu-let-7e, mmu-let-7f, mmu-miR-98 |
| GO:0005544 | calcium-dependent phospholipid binding      | Syt1, Syt11, Syt2                                                                                                                                            | mmu-let-7a, mmu-let-7b, mmu-let-7c, mmu-let-7e, mmu-let-7f, mmu-miR-98 |
| GO:0008022 | protein C-terminus binding                  | Cask, Cep120, Cep135, Coil, Ercc6, Fign, Hic2, Srebf2, Zbtb16, Ercc4                                                                                         | mmu-let-7a, mmu-let-7b, mmu-let-7c, mmu-let-7e, mmu-let-7f, mmu-miR-98 |
| GO:0008134 | transcription factor binding                | Cbx5, Chd4, Dot1l, E2f2, E2f5, Foxp2, Gnptab, Hand1, Hif1an, Hmga1, Hmga2, Lcor, Mdfi, Nlk, Pbx1, Pbx2, Ppara, Ppargc1a, Rb1, Rbpj, Tbx5, Tob2, Trib1, Trib2 | mmu-let-7a, mmu-let-7b, mmu-let-7c, mmu-let-7e, mmu-let-7f, mmu-miR-98 |
| GO:0008194 | UDP-glycosyltransferase activity            | B3galt1, B3gat3, B3gnt1, B3gnt7, Chsy3, Galnt1, Galnt2, Gxylt1, Has2, Lalba, Mgat4a, Ugcg, Ugg1                                                              | mmu-let-7a, mmu-let-7b, mmu-let-7c, mmu-let-7e, mmu-let-7f, mmu-miR-98 |

|            |                                                                  |                                                                                                                                                                                                                                                        |                                                                        |
|------------|------------------------------------------------------------------|--------------------------------------------------------------------------------------------------------------------------------------------------------------------------------------------------------------------------------------------------------|------------------------------------------------------------------------|
| GO:0008233 | peptidase activity                                               | Adamts12, Adamts14, Adamts15, Adamts5, Adamts8, Atg4b, Casp3, Cpa4, Cpd, Ddi2, Dpp3, Klkb1, Lmln, Lonrf3, Masp1, Mbtps2, Npepl1, Pappa, Prss22, Senp2, Senp5, Tmprss11f, Tmprss2, Tnfaip3, Tpp1, Trhde, Usp12, Usp24, Usp32, Usp38, Usp47, Yod1, Mmp11 | mmu-let-7a, mmu-let-7b, mmu-let-7c, mmu-let-7e, mmu-let-7f, mmu-miR-98 |
| GO:0008234 | cysteine-type peptidase activity                                 | Atg4b, Casp3, Senp2, Senp5, Tnfaip3, Usp12, Usp24, Usp32, Usp38, Usp47, Yod1                                                                                                                                                                           | mmu-let-7a, mmu-let-7b, mmu-let-7c, mmu-let-7e, mmu-let-7f, mmu-miR-98 |
| GO:0008237 | metallopeptidase activity                                        | Adamts14, Cpa4, Cpd, Dpp3, Npepl1, Pappa, Trhde                                                                                                                                                                                                        | mmu-let-7a, mmu-let-7b, mmu-let-7c, mmu-let-7e, mmu-let-7f, mmu-miR-98 |
| GO:0008238 | exopeptidase activity                                            | Cpa4, Cpd, Dpp3, Npepl1, Tpp1, Trhde                                                                                                                                                                                                                   | mmu-let-7a, mmu-let-7b, mmu-let-7c, mmu-let-7e, mmu-let-7f, mmu-miR-98 |
| GO:0008330 | protein tyrosine/threonine phosphatase activity                  | Dusp1, Dusp4                                                                                                                                                                                                                                           | mmu-let-7a, mmu-let-7b, mmu-let-7c, mmu-let-7e, mmu-let-7f, mmu-miR-98 |
| GO:0008460 | dTDP-glucose 4,6-dehydratase activity                            | Tgds                                                                                                                                                                                                                                                   | mmu-let-7a, mmu-let-7b, mmu-let-7c, mmu-let-7e, mmu-let-7f, mmu-miR-98 |
| GO:0008508 | bile acid:sodium symporter activity                              | Slc10a6, Slc10a7                                                                                                                                                                                                                                       | mmu-let-7a, mmu-let-7b, mmu-let-7c, mmu-let-7e, mmu-let-7f, mmu-miR-98 |
| GO:0008510 | sodium:bicarbonate symporter activity                            | Slc4a4                                                                                                                                                                                                                                                 | mmu-let-7a, mmu-let-7b, mmu-let-7c, mmu-let-7e, mmu-let-7f, mmu-miR-98 |
| GO:0008523 | sodium-dependent multivitamin transmembrane transporter activity | Slc5a6                                                                                                                                                                                                                                                 | mmu-let-7a, mmu-let-7b, mmu-let-7c, mmu-let-7e, mmu-let-7f, mmu-miR-98 |

|            |                                                                                |                                                                                                 |                                                                        |
|------------|--------------------------------------------------------------------------------|-------------------------------------------------------------------------------------------------|------------------------------------------------------------------------|
| GO:0008532 | N-acetyllactosaminide beta-1,3-N-acetylglucosaminyltransferase activity        | B3gnt1                                                                                          | mmu-let-7a, mmu-let-7b, mmu-let-7c, mmu-let-7e, mmu-let-7f, mmu-miR-98 |
| GO:0008780 | acyl-[acyl-carrier-protein]-UDP-N-acetylglucosamine O-acyltransferase activity | Agpat6                                                                                          | mmu-let-7a, mmu-let-7b, mmu-let-7c, mmu-let-7e, mmu-let-7f, mmu-miR-98 |
| GO:0015016 | [heparan sulfate]-glucosamine N-sulfotransferase activity                      | Ndst2, Ndst3                                                                                    | mmu-let-7a, mmu-let-7b, mmu-let-7c, mmu-let-7e, mmu-let-7f, mmu-miR-98 |
| GO:0015026 | coreceptor activity                                                            | Acvr2a, Igsf1, Tgfbr3                                                                           | mmu-let-7a, mmu-let-7b, mmu-let-7c, mmu-let-7e, mmu-let-7f, mmu-miR-98 |
| GO:0015052 | beta3-adrenergic receptor activity                                             | Adrb3                                                                                           | mmu-let-7a, mmu-let-7b, mmu-let-7c, mmu-let-7e, mmu-let-7f, mmu-miR-98 |
| GO:0015068 | glycine amidinotransferase activity                                            | Gatm                                                                                            | mmu-let-7a, mmu-let-7b, mmu-let-7c, mmu-let-7e, mmu-let-7f, mmu-miR-98 |
| GO:0015291 | secondary active transmembrane transporter activity                            | Slc10a6, Slc10a7, Slc16a14, Slc16a9, Slc24a6, Slc25a18, Slc26a9, Slc4a4, Slc5a6, Slc6a1, Slc8a2 | mmu-let-7a, mmu-let-7b, mmu-let-7c, mmu-let-7e, mmu-let-7f, mmu-miR-98 |
| GO:0015294 | solute:cation symporter activity                                               | Slc10a6, Slc10a7, Slc4a4, Slc5a6, Slc6a1                                                        | mmu-let-7a, mmu-let-7b, mmu-let-7c, mmu-let-7e, mmu-let-7f, mmu-miR-98 |
| GO:0016278 | lysine N-methyltransferase activity                                            | Dot1l, Ezh2, Mll2, Suv39h2                                                                      | mmu-let-7a, mmu-let-7b, mmu-let-7c, mmu-let-7e, mmu-let-7f, mmu-miR-98 |

|            |                                                                                                                                                                                                   |                                                                                                                                                                                                                                                   |                                                                        |
|------------|---------------------------------------------------------------------------------------------------------------------------------------------------------------------------------------------------|---------------------------------------------------------------------------------------------------------------------------------------------------------------------------------------------------------------------------------------------------|------------------------------------------------------------------------|
| GO:0016298 | lipase activity                                                                                                                                                                                   | Dagla, Liph, MglI, Napepld, Pla2g15, Pld3                                                                                                                                                                                                         | mmu-let-7a, mmu-let-7b, mmu-let-7c, mmu-let-7e, mmu-let-7f, mmu-miR-98 |
| GO:0016361 | activin receptor activity, type I                                                                                                                                                                 | Acvr1b, Acvr1c                                                                                                                                                                                                                                    | mmu-let-7a, mmu-let-7b, mmu-let-7c, mmu-let-7e, mmu-let-7f, mmu-miR-98 |
| GO:0016362 | activin receptor activity, type II                                                                                                                                                                | Acvr2a                                                                                                                                                                                                                                            | mmu-let-7a, mmu-let-7b, mmu-let-7c, mmu-let-7e, mmu-let-7f, mmu-miR-98 |
| GO:0016538 | cyclin-dependent protein kinase regulator activity                                                                                                                                                | Casp3, Ccnd1, Ccny                                                                                                                                                                                                                                | mmu-let-7a, mmu-let-7b, mmu-let-7c, mmu-let-7e, mmu-let-7f, mmu-miR-98 |
| GO:0016706 | oxidoreductase activity, acting on paired donors, with incorporation or reduction of molecular oxygen, 2-oxoglutarate as one donor, and incorporation of one atom each of oxygen into both donors | Egln2, Hif1an, P4ha2, Phf8                                                                                                                                                                                                                        | mmu-let-7a, mmu-let-7b, mmu-let-7c, mmu-let-7e, mmu-let-7f, mmu-miR-98 |
| GO:0016740 | transferase activity                                                                                                                                                                              | A130022J15Rik, Agpat6, B3galt1, B3gat3, B3gnt1, B3gnt7, Bcat1, Chsy3, Dlst, Dot1l, Elovl4, Ezh2, Galnt1, Galnt2, Gatm, Gxylt1, Has2, Lalba, Lipt2, Mgat4a, Mll2, Naa30, Nat8l, Ndst2, Ndst3, Piga, Pla2g15, St6gal1, St8sia1, Suv39h2, Ugcg, Ugg1 | mmu-let-7a, mmu-let-7b, mmu-let-7c, mmu-let-7e, mmu-let-7f, mmu-miR-98 |
| GO:0016758 | transferase activity, transferring hexosyl groups                                                                                                                                                 | B3galt1, B3gat3, B3gnt1, B3gnt7, Chsy3, Galnt1, Galnt2, Has2, Lalba, Mgat4a                                                                                                                                                                       | mmu-let-7a, mmu-let-7b, mmu-let-7c, mmu-let-7e, mmu-let-7f, mmu-miR-98 |



|            |                                                            |                                                                                                                                                                                                   |                                                                        |
|------------|------------------------------------------------------------|---------------------------------------------------------------------------------------------------------------------------------------------------------------------------------------------------|------------------------------------------------------------------------|
| GO:0016788 | hydrolase activity, acting on ester bonds                  | Acot11, Aen, Aldh6a1, Cdc25a, Dusp1, Dusp16, Dusp22, Dusp4, Gdpd1, Gns, Nceh1, Pdp2, Ppapdc1b, Ppm1f, Ppme1, Ppp2r2a, Pptc7, Ptprd, Ptpru, Slk, Tnfaip3, Usp12, Usp24, Usp32, Usp38, Usp47, Ercc4 | mmu-let-7a, mmu-let-7b, mmu-let-7c, mmu-let-7e, mmu-let-7f, mmu-miR-98 |
| GO:0016866 | intramolecular transferase activity                        | Pgm2l1, Rpusd2, Rpusd3                                                                                                                                                                            | mmu-let-7a, mmu-let-7b, mmu-let-7c, mmu-let-7e, mmu-let-7f, mmu-miR-98 |
| GO:0017017 | MAP kinase tyrosine/serine/threonine phosphatase activity  | Dusp1, Dusp16, Dusp4                                                                                                                                                                              | mmu-let-7a, mmu-let-7b, mmu-let-7c, mmu-let-7e, mmu-let-7f, mmu-miR-98 |
| GO:0017188 | aspartate N-acetyltransferase activity                     | Nat8l                                                                                                                                                                                             | mmu-let-7a, mmu-let-7b, mmu-let-7c, mmu-let-7e, mmu-let-7f, mmu-miR-98 |
| GO:0018024 | histone-lysine N-methyltransferase activity                | Dot1l, Ezh2, Mll2, Suv39h2                                                                                                                                                                        | mmu-let-7a, mmu-let-7b, mmu-let-7c, mmu-let-7e, mmu-let-7f, mmu-miR-98 |
| GO:0018478 | malonate-semialdehyde dehydrogenase (acetylating) activity | Aldh6a1                                                                                                                                                                                           | mmu-let-7a, mmu-let-7b, mmu-let-7c, mmu-let-7e, mmu-let-7f, mmu-miR-98 |
| GO:0019199 | transmembrane receptor protein kinase activity             | Acvr1b, Acvr1c, Acvr2a, Epha3, Epha4, Igf1r, Insr, Tgfbr1, Tgfbr3                                                                                                                                 | mmu-let-7a, mmu-let-7b, mmu-let-7c, mmu-let-7e, mmu-let-7f, mmu-miR-98 |
| GO:0019210 | kinase inhibitor activity                                  | Casp3, Socs1, Trib1, Trib2                                                                                                                                                                        | mmu-let-7a, mmu-let-7b, mmu-let-7c, mmu-let-7e, mmu-let-7f, mmu-miR-98 |
| GO:0019826 | oxygen sensor activity                                     | Egln2                                                                                                                                                                                             | mmu-let-7a, mmu-let-7b, mmu-let-7c, mmu-let-7e, mmu-let-7f, mmu-miR-98 |
| GO:0019838 | growth factor binding                                      | Acvr2a, Ghr, Igf1r, Insr, Osmr, Thbs1                                                                                                                                                             | mmu-let-7a, mmu-let-7b, mmu-let-7c, mmu-let-7e, mmu-let-7f, mmu-miR-98 |

|            |                                                |                                                                                                                                          |                                                                        |
|------------|------------------------------------------------|------------------------------------------------------------------------------------------------------------------------------------------|------------------------------------------------------------------------|
| GO:0019901 | protein kinase binding                         | Bcl2l1, Ccnd1, Ccnd2, Ccny, Cdc25a, Ghr, Gtf2i, Insr, Mapk6, Pak1, Ppme1, Prkab2, Prlr, Qars, Rab11fip2, Socs1, Taok1                    | mmu-let-7a, mmu-let-7b, mmu-let-7c, mmu-let-7e, mmu-let-7f, mmu-miR-98 |
| GO:0022851 | GABA-gated chloride ion channel activity       | Gabra6                                                                                                                                   | mmu-let-7a, mmu-let-7b, mmu-let-7c, mmu-let-7e, mmu-let-7f, mmu-miR-98 |
| GO:0030165 | PDZ domain binding                             | Acvr2a, Apba1, Cask, Dmd, Gipc1, Grik2, Tgfbr3                                                                                           | mmu-let-7a, mmu-let-7b, mmu-let-7c, mmu-let-7e, mmu-let-7f, mmu-miR-98 |
| GO:0030306 | ADP-ribosylation factor binding                | Gga3, Rab11fip4                                                                                                                          | mmu-let-7a, mmu-let-7b, mmu-let-7c, mmu-let-7e, mmu-let-7f, mmu-miR-98 |
| GO:0030338 | CMP-N-acetylneuraminate monooxygenase activity | Cmah                                                                                                                                     | mmu-let-7a, mmu-let-7b, mmu-let-7c, mmu-let-7e, mmu-let-7f, mmu-miR-98 |
| GO:0030506 | ankyrin binding                                | Obscn, Spnb4                                                                                                                             | mmu-let-7a, mmu-let-7b, mmu-let-7c, mmu-let-7e, mmu-let-7f, mmu-miR-98 |
| GO:0030674 | protein binding, bridging                      | Cbx5, Col1a2, Crk, Frs2, Lor, Prkaa2                                                                                                     | mmu-let-7a, mmu-let-7b, mmu-let-7c, mmu-let-7e, mmu-let-7f, mmu-miR-98 |
| GO:0030695 | GTPase regulator activity                      | Arhgap20, Arhgap28, Arhgef15, Dlc1, Gipc1, Map4k3, Map4k4, Obscn, Plekhg6, Psd3, Rasgrp1, Rgs16, Srgap3, Stard13, Tnik, Tsc1, Vav3, Wasl | mmu-let-7a, mmu-let-7b, mmu-let-7c, mmu-let-7e, mmu-let-7f, mmu-miR-98 |
| GO:0031432 | titin binding                                  | Calm1, Obscn                                                                                                                             | mmu-let-7a, mmu-let-7b, mmu-let-7c, mmu-let-7e, mmu-let-7f, mmu-miR-98 |

|            |                                                 |                                                      |                                                                        |
|------------|-------------------------------------------------|------------------------------------------------------|------------------------------------------------------------------------|
| GO:0031434 | mitogen-activated protein kinase kinase binding | Braf, Map3k1, Trib1                                  | mmu-let-7a, mmu-let-7b, mmu-let-7c, mmu-let-7e, mmu-let-7f, mmu-miR-98 |
| GO:0031624 | ubiquitin conjugating enzyme binding            | Grik2, Ppara                                         | mmu-let-7a, mmu-let-7b, mmu-let-7c, mmu-let-7e, mmu-let-7f, mmu-miR-98 |
| GO:0031625 | ubiquitin protein ligase binding                | Acvr1b, Grik2, Nlk, Rb1, Rnf20, Tgfbr1, Trib1, Trib2 | mmu-let-7a, mmu-let-7b, mmu-let-7c, mmu-let-7e, mmu-let-7f, mmu-miR-98 |
| GO:0031699 | beta-3 adrenergic receptor binding              | Adrb3                                                | mmu-let-7a, mmu-let-7b, mmu-let-7c, mmu-let-7e, mmu-let-7f, mmu-miR-98 |
| GO:0031707 | endothelin A receptor binding                   | Edn1                                                 | mmu-let-7a, mmu-let-7b, mmu-let-7c, mmu-let-7e, mmu-let-7f, mmu-miR-98 |
| GO:0031994 | insulin-like growth factor I binding            | Igf1r, Insr                                          | mmu-let-7a, mmu-let-7b, mmu-let-7c, mmu-let-7e, mmu-let-7f, mmu-miR-98 |
| GO:0031997 | N-terminal myristoylation domain binding        | Calm1                                                | mmu-let-7a, mmu-let-7b, mmu-let-7c, mmu-let-7e, mmu-let-7f, mmu-miR-98 |
| GO:0033781 | cholesterol 24-hydroxylase activity             | Cyp46a1                                              | mmu-let-7a, mmu-let-7b, mmu-let-7c, mmu-let-7e, mmu-let-7f, mmu-miR-98 |
| GO:0033819 | lipoyl(octanoyl) transferase activity           | Lipt2                                                | mmu-let-7a, mmu-let-7b, mmu-let-7c, mmu-let-7e, mmu-let-7f, mmu-miR-98 |
| GO:0034041 | sterol-transporting ATPase activity             | Abcg1                                                | mmu-let-7a, mmu-let-7b, mmu-let-7c, mmu-let-7e, mmu-let-7f, mmu-miR-98 |
| GO:0034711 | inhibin binding                                 | Acvr1b                                               | mmu-let-7a, mmu-let-7b, mmu-let-7c, mmu-let-7e, mmu-let-7f, mmu-miR-98 |

|            |                                         |                                                                                                                                                                                                  |                                                                        |
|------------|-----------------------------------------|--------------------------------------------------------------------------------------------------------------------------------------------------------------------------------------------------|------------------------------------------------------------------------|
| GO:0035064 | methylated histone residue binding      | Cbx2, Cbx5, Ing3, Phf8                                                                                                                                                                           | mmu-let-7a, mmu-let-7b, mmu-let-7c, mmu-let-7e, mmu-let-7f, mmu-miR-98 |
| GO:0035500 | MH2 domain binding                      | Hmga2                                                                                                                                                                                            | mmu-let-7a, mmu-let-7b, mmu-let-7c, mmu-let-7e, mmu-let-7f, mmu-miR-98 |
| GO:0035501 | MH1 domain binding                      | Hmga2                                                                                                                                                                                            | mmu-let-7a, mmu-let-7b, mmu-let-7c, mmu-let-7e, mmu-let-7f, mmu-miR-98 |
| GO:0035757 | chemokine (C-C motif) ligand 19 binding | Ccr7                                                                                                                                                                                             | mmu-let-7a, mmu-let-7b, mmu-let-7c, mmu-let-7e, mmu-let-7f, mmu-miR-98 |
| GO:0035758 | chemokine (C-C motif) ligand 21 binding | Ccr7                                                                                                                                                                                             | mmu-let-7a, mmu-let-7b, mmu-let-7c, mmu-let-7e, mmu-let-7f, mmu-miR-98 |
| GO:0042169 | SH2 domain binding                      | Crk, Dlc1, Ghr, Insr, Nlk                                                                                                                                                                        | mmu-let-7a, mmu-let-7b, mmu-let-7c, mmu-let-7e, mmu-let-7f, mmu-miR-98 |
| GO:0042301 | phosphate ion binding                   | Nceh1, Sh2b3                                                                                                                                                                                     | mmu-let-7a, mmu-let-7b, mmu-let-7c, mmu-let-7e, mmu-let-7f, mmu-miR-98 |
| GO:0042562 | hormone binding                         | Adipor2, Esr2, Ghr, Igf1r, Insr, Prlr                                                                                                                                                            | mmu-let-7a, mmu-let-7b, mmu-let-7c, mmu-let-7e, mmu-let-7f, mmu-miR-98 |
| GO:0042802 | identical protein binding               | Adipor2, Bcat1, Bcl2l1, Coil, Col1a2, Hook1, Igf1r, Kctd17, Pldn, Prkab2, Snx16, Syt1, Uhrf1bp1                                                                                                  | mmu-let-7a, mmu-let-7b, mmu-let-7c, mmu-let-7e, mmu-let-7f, mmu-miR-98 |
| GO:0042803 | protein homodimerization activity       | Abcb9, Abcg1, Adrb2, Adrb3, Arid3a, Eea1, Foxp2, Gale, Gdf6, Ghr, Gipc1, Grik2, Grpel2, Hand1, Hif1an, Homer2, Ikzf2, Masp1, Mgl1, Nr6a1, Pdgb, Rab11fip2, Rab11fip4, Slk, Tarbp2, Thrsp, Zbtb16 | mmu-let-7a, mmu-let-7b, mmu-let-7c, mmu-let-7e, mmu-let-7f, mmu-miR-98 |

|            |                                                                   |                                                                                                                                                                                                         |                                                                        |
|------------|-------------------------------------------------------------------|---------------------------------------------------------------------------------------------------------------------------------------------------------------------------------------------------------|------------------------------------------------------------------------|
| GO:0042826 | histone deacetylase binding                                       | Cbx5, Hic1, Mapk8, Prdm1, Uhrf1bp1                                                                                                                                                                      | mmu-let-7a, mmu-let-7b, mmu-let-7c, mmu-let-7e, mmu-let-7f, mmu-miR-98 |
| GO:0043250 | sodium-dependent organic anion transmembrane transporter activity | Slc10a6                                                                                                                                                                                                 | mmu-let-7a, mmu-let-7b, mmu-let-7c, mmu-let-7e, mmu-let-7f, mmu-miR-98 |
| GO:0043548 | phosphatidylinositol 3-kinase binding                             | Calm1, Igf1r, Insr                                                                                                                                                                                      | mmu-let-7a, mmu-let-7b, mmu-let-7c, mmu-let-7e, mmu-let-7f, mmu-miR-98 |
| GO:0043559 | insulin binding                                                   | Igf1r, Insr                                                                                                                                                                                             | mmu-let-7a, mmu-let-7b, mmu-let-7c, mmu-let-7e, mmu-let-7f, mmu-miR-98 |
| GO:0043560 | insulin receptor substrate binding                                | Igf1r, Insr                                                                                                                                                                                             | mmu-let-7a, mmu-let-7b, mmu-let-7c, mmu-let-7e, mmu-let-7f, mmu-miR-98 |
| GO:0043565 | sequence-specific DNA binding                                     | Bach1, E2f5, Esr2, Esrrb, Ezh2, Foxp2, Gabpa, Hand1, Hic1, Hlf, Hmga2, Lmx1a, Meis2, Meis3, Nlrc5, Nr6a1, Onecut3, Pbx1, Pbx2, Pbx3, Ppara, Prdm1, Prrx1, Rbpj, Rorc, Sox13, Srebf2, Tbx5, Tcf7l1, Elf4 | mmu-let-7a, mmu-let-7b, mmu-let-7c, mmu-let-7e, mmu-let-7f, mmu-miR-98 |
| GO:0046332 | SMAD binding                                                      | Acvr1b, Acvr1c, Col1a2, Col3a1, Col5a2, Hmga2, Skil, Tgfbr1, Tgfbr3, Trim33                                                                                                                             | mmu-let-7a, mmu-let-7b, mmu-let-7c, mmu-let-7e, mmu-let-7f, mmu-miR-98 |
| GO:0046527 | glucosyltransferase activity                                      | Ugcg, Ugg1                                                                                                                                                                                              | mmu-let-7a, mmu-let-7b, mmu-let-7c, mmu-let-7e, mmu-let-7f, mmu-miR-98 |
| GO:0046982 | protein heterodimerization activity                               | Abcg1, Adipor2, Bcl2l1, Braf, Foxp2, Gabpa, Grin2b, Hand1, Homer2, Ikzf2, Limk2, Mapk6, Pbx1, Pdgfb, Ppara, Rragd, Tgfbr1                                                                               | mmu-let-7a, mmu-let-7b, mmu-let-7c, mmu-let-7e, mmu-let-7f, mmu-miR-98 |

|            |                                            |                                |                                                                        |
|------------|--------------------------------------------|--------------------------------|------------------------------------------------------------------------|
| GO:0047933 | glucose-1,6-bisphosphate synthase activity | Pgm2l1                         | mmu-let-7a, mmu-let-7b, mmu-let-7c, mmu-let-7e, mmu-let-7f, mmu-miR-98 |
| GO:0048027 | mRNA 5'-UTR binding                        | Igf2bp2, Igf2bp3               | mmu-let-7a, mmu-let-7b, mmu-let-7c, mmu-let-7e, mmu-let-7f, mmu-miR-98 |
| GO:0048185 | activin binding                            | Acvr1b, Acvr1c, Acvr2a, Tgfbr3 | mmu-let-7a, mmu-let-7b, mmu-let-7c, mmu-let-7e, mmu-let-7f, mmu-miR-98 |
| GO:0048186 | inhibin beta-A binding                     | Acvr2a, Igsf1                  | mmu-let-7a, mmu-let-7b, mmu-let-7c, mmu-let-7e, mmu-let-7f, mmu-miR-98 |
| GO:0048187 | inhibin beta-B binding                     | Acvr2a, Igsf1                  | mmu-let-7a, mmu-let-7b, mmu-let-7c, mmu-let-7e, mmu-let-7f, mmu-miR-98 |
| GO:0048407 | platelet-derived growth factor binding     | Col1a2, Col3a1, Col4a1, Pdgfb  | mmu-let-7a, mmu-let-7b, mmu-let-7c, mmu-let-7e, mmu-let-7f, mmu-miR-98 |
| GO:0050431 | transforming growth factor beta binding    | Tgfbr1, Tgfbr3                 | mmu-let-7a, mmu-let-7b, mmu-let-7c, mmu-let-7e, mmu-let-7f, mmu-miR-98 |
| GO:0051087 | chaperone binding                          | Dlst, Dnajc1, Grpel2, Tsc1     | mmu-let-7a, mmu-let-7b, mmu-let-7c, mmu-let-7e, mmu-let-7f, mmu-miR-98 |
| GO:0051379 | epinephrine binding                        | Adrb2, Adrb3                   | mmu-let-7a, mmu-let-7b, mmu-let-7c, mmu-let-7e, mmu-let-7f, mmu-miR-98 |
| GO:0051380 | norepinephrine binding                     | Adrb2, Adrb3                   | mmu-let-7a, mmu-let-7b, mmu-let-7c, mmu-let-7e, mmu-let-7f, mmu-miR-98 |
| GO:0051575 | 5'-deoxyribose-5-phosphate lyase activity  | Hmga1, Hmga2                   | mmu-let-7a, mmu-let-7b, mmu-let-7c, mmu-let-7e, mmu-let-7f, mmu-miR-98 |

|            |                                                              |               |                                                                        |
|------------|--------------------------------------------------------------|---------------|------------------------------------------------------------------------|
| GO:0051722 | protein C-terminal methyl-esterase activity                  | Ppme1         | mmu-let-7a, mmu-let-7b, mmu-let-7c, mmu-let-7e, mmu-let-7f, mmu-miR-98 |
| GO:0051736 | ATP-dependent polyribonucleotide 5'-hydroxyl-kinase activity | Clp1          | mmu-let-7a, mmu-let-7b, mmu-let-7c, mmu-let-7e, mmu-let-7f, mmu-miR-98 |
| GO:0051787 | misfolded protein binding                                    | Dnajb9, Edem1 | mmu-let-7a, mmu-let-7b, mmu-let-7c, mmu-let-7e, mmu-let-7f, mmu-miR-98 |
| GO:0055106 | ubiquitin-protein ligase regulator activity                  | Trib1, Trib2  | mmu-let-7a, mmu-let-7b, mmu-let-7c, mmu-let-7e, mmu-let-7f, mmu-miR-98 |
| GO:0070123 | transforming growth factor beta receptor activity, type III  | Tgfbr3        | mmu-let-7a, mmu-let-7b, mmu-let-7c, mmu-let-7e, mmu-let-7f, mmu-miR-98 |
| GO:0070215 | MDM2 binding                                                 | Bcl2l1, Ppara | mmu-let-7a, mmu-let-7b, mmu-let-7c, mmu-let-7e, mmu-let-7f, mmu-miR-98 |
| GO:0070290 | NAPE-specific phospholipase D activity                       | Napepld, Pld3 | mmu-let-7a, mmu-let-7b, mmu-let-7c, mmu-let-7e, mmu-let-7f, mmu-miR-98 |
| GO:0070579 | methylcytosine dioxygenase activity                          | Tet2, Tet3    | mmu-let-7a, mmu-let-7b, mmu-let-7c, mmu-let-7e, mmu-let-7f, mmu-miR-98 |
| GO:0071209 | U7 snRNA binding                                             | Lsm11         | mmu-let-7a, mmu-let-7b, mmu-let-7c, mmu-let-7e, mmu-let-7f, mmu-miR-98 |
| GO:0071987 | WD40-repeat domain binding                                   | Usp47         | mmu-let-7a, mmu-let-7b, mmu-let-7c, mmu-let-7e, mmu-let-7f, mmu-miR-98 |
| GO:0097161 | DH domain binding                                            | Epha4         | mmu-let-7a, mmu-let-7b, mmu-let-7c, mmu-let-7e, mmu-let-7f, mmu-miR-98 |

| <b>Down-regulated miRNAs:</b>             |                                                 |                                                                                      |                                                       |
|-------------------------------------------|-------------------------------------------------|--------------------------------------------------------------------------------------|-------------------------------------------------------|
| <b>GO ID<br/>(cellular<br/>Component)</b> | <b>Go Term (Cellular<br/>Component GO Term)</b> | <b>Gene Symbol (genes enriched by down-regulated miRNAs)</b>                         | <b>Down-regulated miRNAs</b>                          |
| GO:0001650                                | fibrillar center                                | Ube2i                                                                                | mmu-miR-124, mmu-miR-30e, mmu-miR-384-5p              |
| GO:0001726                                | ruffle                                          | Frmd4b, Gsn, Lcp1, Myo5a                                                             | mmu-miR-124, mmu-miR-26a, mmu-miR-30e, mmu-miR-384-5p |
| GO:0005622                                | intracellular                                   | Zfp608, Zfp706, Adcy9, EphA2, Rasd2, Rhog, Ror2, Rras, Sos2, Tbc1d9b                 | mmu-miR-124, mmu-miR-26a, mmu-miR-30e, mmu-miR-384-5p |
| GO:0005626                                | insoluble fraction                              | Arhgap17, Capn1, Ppp3cb                                                              | mmu-miR-124, mmu-miR-26a, mmu-miR-30e, mmu-miR-384-5p |
| GO:0005635                                | nuclear envelope                                | Lass2, Ache, Ankle2, Ednrb, Ern1, Htatip2, Itpr3, Lemd2, Smad1                       | mmu-miR-124, mmu-miR-26a, mmu-miR-30e, mmu-miR-384-5p |
| GO:0005637                                | nuclear inner membrane                          | Ern1, Lemd2, Smad1                                                                   | mmu-miR-124, mmu-miR-26a, mmu-miR-30e, mmu-miR-384-5p |
| GO:0005759                                | mitochondrial matrix                            | Acadvl, Acss1, Aldh4a1, Bckdha, Gstk1, Pde2a, Suclg2                                 | mmu-miR-124, mmu-miR-379                              |
| GO:0005764                                | lysosome                                        | Acp2, Cd164, Dram1, Galc, Kif2a, Lmbrd1, Pcyox1, Plekhf1, Prdx6, Rab27a              | mmu-miR-124, mmu-miR-26a, mmu-miR-30e, mmu-miR-384-5p |
| GO:0005773                                | vacuole                                         | Acp2, Cd164, Dram1, Galc, Kif2a, Lmbrd1, Pcyox1, Plekhf1, Prdx6, Rab27a, Ttc3, Vps35 | mmu-miR-124, mmu-miR-26a, mmu-miR-30e, mmu-miR-384-5p |
| GO:0005788                                | endoplasmic reticulum lumen                     | Dnajc1, Edem3, Ache                                                                  | mmu-miR-124, mmu-miR-30e, mmu-miR-379, mmu-miR-384-5p |



|            |                                                      |                                                                                                               |                                                                    |
|------------|------------------------------------------------------|---------------------------------------------------------------------------------------------------------------|--------------------------------------------------------------------|
| GO:0005789 | endoplasmic reticulum membrane                       | Faf2, Dgat2, Cyb5, Ern1, Itpr3, Lman2l, Mtdh, Pemt, Rhbdf1, Ryr1, Erlin1                                      | mmu-miR-124, mmu-miR-26a, mmu-miR-30e, mmu-miR-384-5p              |
| GO:0005792 | microsome                                            | Dmd, Dnajc1, Rdh10, Dgat2, Atp1a1, Clip3, Cpt1a, Cyb5, Itpr3, Sc5d, Scd1, Slc27a1, Tmed10                     | mmu-miR-124, mmu-miR-26a, mmu-miR-30e, mmu-miR-384-5p              |
| GO:0005793 | endoplasmic reticulum-Golgi intermediate compartment | Surf4, Tmed1, Tmed10                                                                                          | mmu-miR-124, mmu-miR-26a, mmu-miR-30e, mmu-miR-384-5p              |
| GO:0005811 | lipid particle                                       | Faf2, Dgat2, Cav1, Lipe                                                                                       | mmu-miR-124, mmu-miR-30e, mmu-miR-384-5p                           |
| GO:0005815 | microtubule organizing center                        | Abca2, Fgfr1op, Cspp1, Dctn4, Flot1, Gnai1, Gnai2, Kif2a, Kif3a, Pan3, Poc1b, Usp2                            | mmu-miR-124, mmu-miR-30e, mmu-miR-384-5p                           |
| GO:0005834 | heterotrimeric G-protein complex                     | Gnal, Gna13, Gnai1, Gnai2, Gng10, Rgs9                                                                        | mmu-miR-124, mmu-miR-26a, mmu-miR-30e, mmu-miR-384-5p              |
| GO:0005911 | cell-cell junction                                   | Dlg5, Myo1e, Arhgap17, Twf1, Ocln, Anxa5, Fzd4, Mtdh, Pcdh1, Tjp2, Abi2, Epb4.113                             | mmu-miR-124, mmu-miR-26a, mmu-miR-30e, mmu-miR-384-5p              |
| GO:0005912 | adherens junction                                    | Dlg5, Myo1e, Aif1l, Cav1, Epha2, Sdc4, Abi2                                                                   | mmu-miR-124, mmu-miR-26a, mmu-miR-30e, mmu-miR-384-5p              |
| GO:0008021 | synaptic vesicle                                     | Gria2, Kif3a, Myo5a, Sphk1, Sypl                                                                              | mmu-miR-124, mmu-miR-30e, mmu-miR-379, mmu-miR-384-5p              |
| GO:0009898 | internal side of plasma membrane                     | Gnal, Gcom1, Gna13, Gnai1, Gnai2, Gng10, Rgs9                                                                 | mmu-miR-124, mmu-miR-26a, mmu-miR-30e, mmu-miR-384-5p              |
| GO:0012505 | endomembrane system                                  | Faf2, Dgat2, Gria2, Abcc4, Cav1, Clip3, Cyb5, Lman2l, Mtdh, Pemt, Qsox1, Rab27a, Rhbdf1, Ryr1, Tmed10, Erlin1 | mmu-miR-124, mmu-miR-26a, mmu-miR-30e, mmu-miR-379, mmu-miR-384-5p |

|            |                              |                                                                                                  |                                                                    |
|------------|------------------------------|--------------------------------------------------------------------------------------------------|--------------------------------------------------------------------|
| GO:0015629 | actin cytoskeleton           | Myo1e, Twf1, Aif1l, Arpc1b, Dapk1, Gas2l1, Gcom1, Gsn, Lcp1, Myh10, Myo5a, Pgm2, Sept9, Pawr     | mmu-miR-124, mmu-miR-26a, mmu-miR-30e, mmu-miR-384-5p              |
| GO:0016020 | membrane                     | Edem3, Rffl, 2610018G03Rik, Cadps, Gas2, Plod3, Rufy1, Sdf2l1, Snap29, Yme1l1, Fkbp3, Sema3a     | mmu-miR-124, mmu-miR-26a, mmu-miR-30e, mmu-miR-379, mmu-miR-384-5p |
| GO:0016323 | basolateral plasma membrane  | Adam9, Slc22a5, Abcc4, Atp1a1, Slc29a1, Stk39                                                    | mmu-miR-124, mmu-miR-26a, mmu-miR-30e, mmu-miR-379, mmu-miR-384-5p |
| GO:0016324 | apical plasma membrane       | Slc22a5, Anxa4, Cav1, Dsg2, Mtdh, Rab27a, Slc29a1, Stk39                                         | mmu-miR-124, mmu-miR-26a, mmu-miR-30e, mmu-miR-384-5p              |
| GO:0016529 | sarcoplasmic reticulum       | Agl, Calu, Casq2, Ryr1                                                                           | mmu-miR-124, mmu-miR-30e, mmu-miR-384-5p                           |
| GO:0019897 | extrinsic to plasma membrane | Gnal, Gcom1, Gna13, Gnai1, Gnai2, Gng10, Ppl, Rgs9                                               | mmu-miR-124, mmu-miR-26a, mmu-miR-30e, mmu-miR-384-5p              |
| GO:0030027 | lamellipodium                | Gsn, Pip5k1a, Sh3rf1, Spata13, Abi2, Ptpn13                                                      | mmu-miR-124, mmu-miR-26a, mmu-miR-30e, mmu-miR-384-5p              |
| GO:0030054 | cell junction                | Homer2, Pcdh8, Ctnnd2, Gria2, Ache, Cacng5, Cadps, Cbln4, Gcom1, Kctd8, Lcp1, Ppl, Snap29, Snta1 | mmu-miR-124, mmu-miR-26a, mmu-miR-30e, mmu-miR-379, mmu-miR-384-5p |
| GO:0030055 | cell-substrate junction      | Dmd, Aif1l, Cav1, Epha2, Sdc4                                                                    | mmu-miR-124, mmu-miR-26a, mmu-miR-30e, mmu-miR-384-5p              |
| GO:0030057 | desmosome                    | Dsg2, Pnn                                                                                        | mmu-miR-124, mmu-miR-30e, mmu-miR-384-5p                           |
| GO:0030425 | dendrite                     | Homer2, Ctnnd2, Gria2, Ache, Cacng5, Myh10, Numa1, Rab27a, Slc1a4, Ube2i, Abi2, Sema3a           | mmu-miR-124, mmu-miR-26a, mmu-miR-30e, mmu-miR-379, mmu-miR-384-5p |

|            |                                                                                               |                                              |                                                                    |
|------------|-----------------------------------------------------------------------------------------------|----------------------------------------------|--------------------------------------------------------------------|
| GO:0030667 | secretory granule membrane                                                                    | Abcc4, Cav1, Rab27a, Tmed10                  | mmu-miR-124, mmu-miR-26a, mmu-miR-30e, mmu-miR-379, mmu-miR-384-5p |
| GO:0031372 | UBC13-MMS2 complex                                                                            | Ube2v2                                       | mmu-miR-124, mmu-miR-30e, mmu-miR-384-5p                           |
| GO:0031526 | brush border membrane                                                                         | Slc22a5, Gna13, Pemt                         | mmu-miR-124, mmu-miR-26a                                           |
| GO:0032281 | alpha-amino-3-hydroxy-5-methyl-4-isoxazolepropionic acid selective glutamate receptor complex | Gria2, Cacng5                                | mmu-miR-124, mmu-miR-30e, mmu-miR-379, mmu-miR-384-5p              |
| GO:0032587 | ruffle membrane                                                                               | Twf1, Pip5k1a, Spata13                       | mmu-miR-124, mmu-miR-26a, mmu-miR-30e, mmu-miR-384-5p              |
| GO:0042383 | sarcolemma                                                                                    | Dmd, Anxa5, Atp1a1, Flot1, Pemt, Ryr1, Snta1 | mmu-miR-124, mmu-miR-30e, mmu-miR-384-5p                           |
| GO:0042470 | melanosome                                                                                    | Myo5a, Rab27a                                | mmu-miR-124, mmu-miR-30e, mmu-miR-384-5p                           |
| GO:0042588 | zymogen granule                                                                               | Rab3d, Tmed10                                | mmu-miR-124, mmu-miR-26a, mmu-miR-30e, mmu-miR-384-5p              |
| GO:0042642 | actomyosin, myosin complex part                                                               | Myo5a                                        | mmu-miR-124, mmu-miR-30e, mmu-miR-384-5p                           |
| GO:0042734 | presynaptic membrane                                                                          | Gria2, Ache, Pde2a                           | mmu-miR-124, mmu-miR-30e, mmu-miR-379, mmu-miR-384-5p              |
| GO:0043034 | costamere                                                                                     | Dmd, Fxr1, Sdc4                              | mmu-miR-124, mmu-miR-30e, mmu-miR-384-5p                           |
| GO:0043292 | contractile fiber                                                                             | Dmd, Twf1, Fxr1, Gcom1, Ryr1, Sdc4           | mmu-miR-124, mmu-miR-26a, mmu-miR-30e, mmu-miR-384-5p              |

|                                   |                                                                      |                                                                                                                                                   |                                                                    |
|-----------------------------------|----------------------------------------------------------------------|---------------------------------------------------------------------------------------------------------------------------------------------------|--------------------------------------------------------------------|
| GO:0044424                        | intracellular part                                                   | Gnal, Fbxo27, Gna13, Gng10, Ppp3cb                                                                                                                | mmu-miR-124, mmu-miR-26a, mmu-miR-30e, mmu-miR-384-5p              |
| GO:0045121                        | membrane raft                                                        | Dmd, Clip3, Ednrb, Efnb1, Gnai1, Gnai2, Pde2a, Sdc4, Usp48                                                                                        | mmu-miR-124, mmu-miR-26a, mmu-miR-30e, mmu-miR-379, mmu-miR-384-5p |
| GO:0045202                        | synapse                                                              | Dmd, Homer2, Pcdh8, Ctnnd2, Gria2, Ache, Cacng5, Cadps, Cbln4, Efnb1, Kctd8, Kif3a, Myh10, Myo5a, Pde2a, Snap29, Snta1, Sphk1, Sypl, Ube2i, Usp48 | mmu-miR-124, mmu-miR-26a, mmu-miR-30e, mmu-miR-379, mmu-miR-384-5p |
| GO:0045211                        | postsynaptic membrane                                                | Homer2, Pcdh8, Gria2, Ache, Cacng5, Kctd8, Snta1, Usp48                                                                                           | mmu-miR-124, mmu-miR-26a, mmu-miR-30e, mmu-miR-379, mmu-miR-384-5p |
| GO:0048471                        | perinuclear region of cytoplasm                                      | Ppm1f, Twf1, Dgat2, Fgfr1op, Kalrn, Ache, Apln, Cav1, Chodl, Gsn, Inf2, Mtdh, Pde2a, Phex, Sept9, Tpd52l2, Usp2                                   | mmu-miR-124, mmu-miR-26a, mmu-miR-30e, mmu-miR-379, mmu-miR-384-5p |
| GO:0070765                        | gamma-secretase complex                                              | Tmed10                                                                                                                                            | mmu-miR-124, mmu-miR-26a, mmu-miR-30e, mmu-miR-384-5p              |
|                                   |                                                                      |                                                                                                                                                   |                                                                    |
|                                   |                                                                      |                                                                                                                                                   |                                                                    |
|                                   |                                                                      |                                                                                                                                                   |                                                                    |
| <b>GO ID (biological process)</b> | <b>Go Term (biological process GO Term)</b>                          | <b>Gene Symbol (genes enriched by down-regulated miRNAs)</b>                                                                                      | <b>Down-regulated miRNAs</b>                                       |
| GO:0000038                        | very long-chain fatty acid metabolic process                         | Acadvl, Elovl5, Sphk1                                                                                                                             | mmu-miR-124, mmu-miR-30e, mmu-miR-384-5p                           |
| GO:0000122                        | negative regulation of transcription from RNA polymerase II promoter | Cbx2, Edn1, Sall4, Bcl6, Aes, Barx2, Cav1, Ednrb, Mtdh, Pde2a, Rarg, Rxra, Snai2, Ube2i, Usp2, Yeats2, Fst                                        | mmu-miR-124, mmu-miR-26a, mmu-miR-30e, mmu-miR-379, mmu-miR-384-5p |

|            |                                                |                                                                                                                                      |                                                                    |
|------------|------------------------------------------------|--------------------------------------------------------------------------------------------------------------------------------------|--------------------------------------------------------------------|
| GO:000186  | activation of MAPKK activity                   | Map3k1, Adam9, Gnai2                                                                                                                 | mmu-miR-124, mmu-miR-26a, mmu-miR-30e, mmu-miR-379, mmu-miR-384-5p |
| GO:000904  | cell morphogenesis involved in differentiation | Epha2, Fzd4, Plod3, Snai2, Ttc3                                                                                                      | mmu-miR-124, mmu-miR-26a, mmu-miR-30e, mmu-miR-384-5p              |
| GO:0001501 | skeletal system development                    | Edn1, Acp2, Aes, Epha2, Ryr1, Snai2, Smad1                                                                                           | mmu-miR-124, mmu-miR-26a, mmu-miR-30e, mmu-miR-379, mmu-miR-384-5p |
| GO:0001525 | angiogenesis                                   | Edn1, Pcd10, C1galt1, Dll4, Epha2, Gna13, Htatip2, Mtdh, Nr4a1, Ovol2, Sphk1                                                         | mmu-miR-124, mmu-miR-26a, mmu-miR-30e, mmu-miR-379, mmu-miR-384-5p |
| GO:0001655 | urogenital system development                  | Rdh10, Eya1, Myo1e, Anxa4, Bmp6, C1galt1, Kif3a, Rarg, Rxra, Sox8, Nid1                                                              | mmu-miR-124, mmu-miR-26a, mmu-miR-30e, mmu-miR-384-5p              |
| GO:0001701 | in utero embryonic development                 | Edn1, Rdh10, Sall4, Myo1e, Tet1, Apba3, Gna13, Kif3a, Myh10, Ovol2, Plod3, Sox8                                                      | mmu-miR-124, mmu-miR-26a, mmu-miR-30e, mmu-miR-379, mmu-miR-384-5p |
| GO:0001755 | neural crest cell migration                    | Ednrb, Efnb1, Ovol2, Sox8                                                                                                            | mmu-miR-124, mmu-miR-30e, mmu-miR-384-5p                           |
| GO:0001822 | kidney development                             | Rdh10, Eya1, Myo1e, Anxa4, Bmp6, C1galt1, Kif3a, Sox8, Nid1                                                                          | mmu-miR-124, mmu-miR-26a, mmu-miR-30e, mmu-miR-384-5p              |
| GO:0001932 | regulation of protein phosphorylation          | Edn1, Map3k1, Tcfap4, Pcd10, Adam9, Fgfr1op, Akt1s1, Bmp6, Cav1, Clip3, Ednrb, Ern1, Fzd4, Gnai2, Sdc4, Sfrp5, Slc27a1, Sphk1, Trib3 | mmu-miR-124, mmu-miR-26a, mmu-miR-30e, mmu-miR-379, mmu-miR-384-5p |
| GO:0001944 | vasculature development                        | Edn1, Eya1, Myo1e, Pcd10, Rapgef1, C1galt1, Cav1, Dll4, Epha2, Fzd4, Gna13, Htatip2, Itga7, Mtdh, Nr4a1, Ovol2, Rxra, Sfrp5, Sphk1   | mmu-miR-124, mmu-miR-26a, mmu-miR-30e, mmu-miR-379, mmu-miR-384-5p |
| GO:0001952 | regulation of cell-matrix adhesion             | Epha3, Ppm1f, Bcl6, Sdc4                                                                                                             | mmu-miR-124, mmu-miR-30e, mmu-miR-384-5p                           |

|            |                                                                     |                                                                                                                                        |                                                                    |
|------------|---------------------------------------------------------------------|----------------------------------------------------------------------------------------------------------------------------------------|--------------------------------------------------------------------|
| GO:0003018 | vascular process in circulatory system                              | Edn1, Apln, Cav1, Ednrb, Pde2a, Plod3                                                                                                  | mmu-miR-124, mmu-miR-30e, mmu-miR-379, mmu-miR-384-5p              |
| GO:0003430 | growth plate cartilage chondrocyte growth                           | Rarg                                                                                                                                   | mmu-miR-124, mmu-miR-30e, mmu-miR-384-5p                           |
| GO:0003433 | chondrocyte development involved in endochondral bone morphogenesis | Rarg                                                                                                                                   | mmu-miR-124, mmu-miR-30e, mmu-miR-384-5p                           |
| GO:0006140 | regulation of nucleotide metabolic process                          | Edn1, Epha3, Gnal, Arhgap17, Bcl6, Adcy9, Epha2, Gna13, Gnai1, Gnai2, Pde2a, Pip5k1a, Rgs9, Rhog, Tbc1d9b                              | mmu-miR-124, mmu-miR-26a, mmu-miR-30e, mmu-miR-379, mmu-miR-384-5p |
| GO:0006164 | purine nucleotide biosynthetic process                              | Edn1, Gnal, Adcy9, Gna13, Gnai1, Gnai2, Pde2a                                                                                          | mmu-miR-124, mmu-miR-26a, mmu-miR-30e, mmu-miR-379, mmu-miR-384-5p |
| GO:0006184 | GTP catabolic process                                               | Epha3, Gnal, Arhgap17, At13, Bcl6, Epha2, Gna13, Gnai1, Gnai2, Pip5k1a, Rab27a, Rasd2, Rgs9, Rhog, Rras, Tbc1d9b                       | mmu-miR-124, mmu-miR-26a, mmu-miR-30e, mmu-miR-384-5p              |
| GO:0006282 | regulation of DNA repair                                            | Eya1, Ube2v2, Usp1                                                                                                                     | mmu-miR-124, mmu-miR-30e, mmu-miR-384-5p                           |
| GO:0006357 | regulation of transcription from RNA polymerase II promoter         | Map3k1, Eya1, Tcfap4, Abca2, Lhx2, Bmp6, Ctdsp1, Dlx5, Eaf1, Fzd4, Hoxb1, Htatip2, Nr4a1, Sfrp5, Sox8, Tbx19, Xrcc6, Smad1             | mmu-miR-124, mmu-miR-26a, mmu-miR-30e, mmu-miR-379, mmu-miR-384-5p |
| GO:0006464 | protein modification process                                        | P4ha2, Suv39h2, Eya1, Ttl, P4ha1, C1galt1, Ctdsp1, Eya2, Galnt10, Mtr, Qsox1, Rab3d, Snai2, Spock3, Ssh3, Stt3a, Yeats2, Fkbp3, Ptpn13 | mmu-miR-124, mmu-miR-26a, mmu-miR-30e, mmu-miR-384-5p              |
| GO:0006468 | protein phosphorylation                                             | Epha3, Kalrn, 2610018G03Rik, Dapk1, Epha2, Htatip2, Pan3, Pim3, Ror2, Srpk3, Stk39, Abi2, Smad1, Rps6ka2, Ppp3cb                       | mmu-miR-124, mmu-miR-26a, mmu-miR-30e, mmu-miR-384-5p              |
| GO:0006511 | ubiquitin-dependent protein catabolic process                       | Edem3, Map3k1, Ube2v2, Trib3, Ttc3, Ube2i, Usp1, Usp2, Usp30, Usp48, Erlin1                                                            | mmu-miR-124, mmu-miR-26a, mmu-miR-30e, mmu-miR-379, mmu-miR-384-5p |

|            |                                                 |                                                                                                                                                         |                                                                    |
|------------|-------------------------------------------------|---------------------------------------------------------------------------------------------------------------------------------------------------------|--------------------------------------------------------------------|
| GO:0006520 | cellular amino acid metabolic process           | Aldh4a1, Bckdha, Farsa, Gfpt2, Hars2, Htatip2, Mtr                                                                                                      | mmu-miR-124, mmu-miR-30e, mmu-miR-384-5p                           |
| GO:0006575 | cellular modified amino acid metabolic process  | Ctns, P4ha2, P4ha1, Fpgs, Gstk1, Pcyox1                                                                                                                 | mmu-miR-124, mmu-miR-30e, mmu-miR-384-5p                           |
| GO:0006633 | fatty acid biosynthetic process                 | Edn1, Scd2, Fa2h, Scd1, Sphk1                                                                                                                           | mmu-miR-124, mmu-miR-26a, mmu-miR-30e, mmu-miR-379, mmu-miR-384-5p |
| GO:0006665 | sphingolipid metabolic process                  | Fa2h, Lass2, B4galt6, Galc, Sphk1                                                                                                                       | mmu-miR-124, mmu-miR-26a, mmu-miR-30e, mmu-miR-384-5p              |
| GO:0006730 | one-carbon metabolic process                    | Suv39h2, Tet1, Ocln, Aldh1l2, Fpgs, Ftsjd1, Mat2a, Mtr, Nsun2, Pemt, Rab3d                                                                              | mmu-miR-124, mmu-miR-26a, mmu-miR-30e, mmu-miR-384-5p              |
| GO:0006796 | phosphate-containing compound metabolic process | Epha3, Nme4, Ak2, Pip4k2a, Kalrn, 2610018G03Rik, Cycs, Dapk1, Dcakd, Epha2, Gk5, Htatip2, Pan3, Pim3, Pip5k1a, Ror2, Srpk3, Stk39, Abi2, Smad1, Rps6ka2 | mmu-miR-124, mmu-miR-26a, mmu-miR-30e, mmu-miR-384-5p              |
| GO:0006810 | transport                                       | Fa2h, Myo1e, Arhgap17, Slc25a1, Ache, Aldh1l2, Casc3, Chic2, Cyb5, Eny2, Flot1, Gsn, Htatip2, Lmbrd1, Myh10, Plekhf1, Slc35f5, Sypl, Vamp4              | mmu-miR-124, mmu-miR-26a, mmu-miR-30e, mmu-miR-384-5p              |
| GO:0006855 | drug transmembrane transport                    | Slc22a5, Abcc4                                                                                                                                          | mmu-miR-124, mmu-miR-26a, mmu-miR-30e, mmu-miR-379, mmu-miR-384-5p |
| GO:0006885 | regulation of pH                                | Edn1, Ednrb, Slc9a2, Slc9a9                                                                                                                             | mmu-miR-124, mmu-miR-26a, mmu-miR-30e, mmu-miR-379, mmu-miR-384-5p |
| GO:0006915 | apoptotic process                               | Ppm1f, Trim39, Rffl, Dram1, Epha2, Eya2, Gas2, Gsn, Peg3, Trib3, Sema3a                                                                                 | mmu-miR-124, mmu-miR-26a, mmu-miR-30e, mmu-miR-379, mmu-miR-384-5p |
| GO:0006928 | cellular component movement                     | Kif21b, Celsr3, Ednrb, Efnb1, Itga7, Kif2a, Kif3a, Mdk, Myh10, Myo5a, Nr4a1, Ovol2, Pip5k1a, Rhbdf1, Rhog, Sox8, Abi2                                   | mmu-miR-124, mmu-miR-26a, mmu-miR-30e, mmu-miR-384-5p              |

|            |                                 |                                                                                                                                               |                                                                    |
|------------|---------------------------------|-----------------------------------------------------------------------------------------------------------------------------------------------|--------------------------------------------------------------------|
| GO:0006939 | smooth muscle contraction       | Edn1, Cav1, Ednrb, Sphk1, Tpcn2, Htr1d                                                                                                        | mmu-miR-124, mmu-miR-30e, mmu-miR-379, mmu-miR-384-5p              |
| GO:0006970 | response to osmotic stress      | Map3k1, Tsc22d4, Xrcc6                                                                                                                        | mmu-miR-124, mmu-miR-30e, mmu-miR-379, mmu-miR-384-5p              |
| GO:0007015 | actin filament organization     | Ppm1f, Arhgap17, Lcp1, Sdc4, Pawr                                                                                                             | mmu-miR-124, mmu-miR-26a, mmu-miR-30e, mmu-miR-384-5p              |
| GO:0007017 | microtubule-based process       | Epha3, Kif21b, Eya1, Ttl, Fgfr1op, Cav1, Clip3, Gas2l1, Kif2a, Kif3a, Numa1, Ranbp10                                                          | mmu-miR-124, mmu-miR-26a, mmu-miR-30e, mmu-miR-384-5p              |
| GO:0007155 | cell adhesion                   | Sdk1, Pcdh8, Cd164, Cdh20, Ctnnd2, Rargef1, Acan, Ache, Barx2, Celsr3, Col12a1, Dsg2, Itga7, Itgae, Pcdh1, Pcdh17, Pip5k1a, Pnn, Ror2, Tmem8b | mmu-miR-124, mmu-miR-26a, mmu-miR-30e, mmu-miR-379, mmu-miR-384-5p |
| GO:0007156 | homophilic cell adhesion        | Pcdh8, Cdh20, Celsr3, Dsg2, Pcdh1                                                                                                             | mmu-miR-124, mmu-miR-26a, mmu-miR-30e, mmu-miR-384-5p              |
| GO:0007160 | cell-matrix adhesion            | Adam9, Pip5k1a, Tmem8b, Nid1                                                                                                                  | mmu-miR-124, mmu-miR-26a, mmu-miR-30e, mmu-miR-384-5p              |
| GO:0007254 | JNK cascade                     | Edn1, Map3k1, Fzd4, Ror2, Sfrp5, Sh3rf1                                                                                                       | mmu-miR-124, mmu-miR-26a, mmu-miR-30e, mmu-miR-379, mmu-miR-384-5p |
| GO:0007265 | Ras protein signal transduction | Bcl6, Kalrn, Arhgef4, Dhcr24, Flot1, Gna13, Rhog, Sos2, Spata13, Brap                                                                         | mmu-miR-124, mmu-miR-26a, mmu-miR-30e, mmu-miR-384-5p              |
| GO:0007268 | synaptic transmission           | Dmd, Edn1, Cacnb2, Pcdh8, Ctnnd2, Gria2, Ube2v2, Ache, Aldh9a1, Apba3, Cadps, Gnai1, Gnai2, Myo5a, Rasd2, Slc29a1, Sphk1                      | mmu-miR-124, mmu-miR-26a, mmu-miR-30e, mmu-miR-379, mmu-miR-384-5p |
| GO:0007389 | pattern specification process   | Edn1, Eya1, Pcdh8, Lhx2, Efnb1, Gas1, Gna13, Hoxb1, Kif3a, Ovol2, Rarg, Ror2, Fst                                                             | mmu-miR-124, mmu-miR-26a, mmu-miR-30e, mmu-miR-379, mmu-miR-384-5p |
| GO:0007411 | axon guidance                   | Lhx2, Dlx5, Efnb1, Flot1, Gas1, Myh10, Slit1, Sema3a                                                                                          | mmu-miR-124, mmu-miR-30e, mmu-miR-379, mmu-miR-384-5p              |
| GO:0007413 | axonal fasciculation            | Celsr3, Sema3a                                                                                                                                | mmu-miR-124, mmu-miR-30e, mmu-miR-379, mmu-miR-384-5p              |



|            |                                           |                                                                                                                                      |                                                                    |
|------------|-------------------------------------------|--------------------------------------------------------------------------------------------------------------------------------------|--------------------------------------------------------------------|
| GO:0007420 | brain development                         | Ctns, Lhx2, Fzd4, Gas1, Hoxb1, Mdk, Myh10, Sfrp5, Slit1, Sphk1, Tbx19, Twsg1, Smad1                                                  | mmu-miR-124, mmu-miR-26a, mmu-miR-30e, mmu-miR-384-5p              |
| GO:0007423 | sensory organ development                 | Edn1, Map3k1, Eya1, Ache, Bmp6, Epha2, Fzd4, Gas1, Myh10, Rarg, Ror2, Sox8, Twsg1, Abi2, Mab211l1                                    | mmu-miR-124, mmu-miR-26a, mmu-miR-30e, mmu-miR-379, mmu-miR-384-5p |
| GO:0007497 | posterior midgut development              | Ednrb                                                                                                                                | mmu-miR-124, mmu-miR-30e, mmu-miR-384-5p                           |
| GO:0007517 | muscle organ development                  | Dmd, Fxr1, Cd164, Barx2, Cav1, Lemd2, Rcan1, Rxra, Ryr1, Snta1, Sox8, Srpk3, Usp2                                                    | mmu-miR-124, mmu-miR-30e, mmu-miR-384-5p                           |
| GO:0007519 | skeletal muscle tissue development        | Dmd, Barx2, Cav1, Lemd2, Rcan1, Ryr1, Snta1, Sox8, Srpk3, Usp2                                                                       | mmu-miR-124, mmu-miR-30e, mmu-miR-384-5p                           |
| GO:0008152 | metabolic process                         | Kif21b, Acp2, Rffl, Dram1, Enpp4, Galnt12, Galnt9, Glt8d1, Kif2a, Kif3a, Myh10, Parp16, Parp9, Ptprz1, Tmed10, Tpst2, Zdhhc20, Mkrn3 | mmu-miR-124, mmu-miR-26a, mmu-miR-30e, mmu-miR-384-5p              |
| GO:0008154 | actin polymerization or depolymerization  | Map3k1, Twf1, Arpc1b, Gsn, Ssh3                                                                                                      | mmu-miR-124, mmu-miR-26a, mmu-miR-30e, mmu-miR-379, mmu-miR-384-5p |
| GO:0008219 | cell death                                | Ppm1f, Acp2, Trim39, Rffl, 2610018G03Rik, Ache, Bcl2l13, Dram1, Dsg2, Epha2, Eya2, Gas2, Gsn, Mdk, Mmd2, Peg3, Rilpl1, Trib3, Sema3a | mmu-miR-124, mmu-miR-26a, mmu-miR-30e, mmu-miR-379, mmu-miR-384-5p |
| GO:0008284 | positive regulation of cell proliferation | Edn1, Eya1, Pdcd10, Bcl6, Fgfr1op, Abcc4, Apln, Bmp6, Dlx5, Ednrb, Efnb1, Gas1, Gnai2, Gpam, Nr4a1, Sox8, Sphk1, Mab211l1            | mmu-miR-124, mmu-miR-26a, mmu-miR-30e, mmu-miR-379, mmu-miR-384-5p |
| GO:0008285 | negative regulation of cell proliferation | Tcfap4, Bcl6, Cav1, Dhcr24, Gas1, Ovol2, Pemt, Rarg, Ror2, Rxra, Sfrp5, Pawr, Smad1, Rps6ka2                                         | mmu-miR-124, mmu-miR-26a, mmu-miR-30e, mmu-miR-384-5p              |
| GO:0008361 | regulation of cell size                   | Edn1, Ttl, Akt1s1, Slit1, Sema3a                                                                                                     | mmu-miR-124, mmu-miR-30e, mmu-miR-379, mmu-miR-384-5p              |
| GO:0008544 | epidermis development                     | Barx2, Dhcr24, Epha2, Myo5a, Ovol2, Plod3, Ppl, Ryr1, Fst                                                                            | mmu-miR-124, mmu-miR-26a, mmu-miR-30e, mmu-miR-379, mmu-miR-384-5p |

|            |                                                  |                                                                                                                                                              |                                                                    |
|------------|--------------------------------------------------|--------------------------------------------------------------------------------------------------------------------------------------------------------------|--------------------------------------------------------------------|
| GO:0008643 | carbohydrate transport                           | Edn1, Slc2a12, Clip3, Slc17a5, Trib3                                                                                                                         | mmu-miR-124, mmu-miR-379                                           |
| GO:0009057 | macromolecule catabolic process                  | Agl, Casc3, Cycs, Dhcr24, Nthl1, Pan3, Tmed10                                                                                                                | mmu-miR-124, mmu-miR-26a, mmu-miR-30e, mmu-miR-384-5p              |
| GO:0009058 | biosynthetic process                             | Ache, Aldh1l2, Dhcr24, Gfpt2, Gpt2, Sc5d                                                                                                                     | mmu-miR-124, mmu-miR-30e, mmu-miR-384-5p                           |
| GO:0009078 | pyruvate family amino acid metabolic process     | Gpt2                                                                                                                                                         | mmu-miR-124, mmu-miR-30e, mmu-miR-384-5p                           |
| GO:0009100 | glycoprotein metabolic process                   | Edem3, Acan, C1galt1, Dhcr24, Galnt10, Spock3, Stt3a, Tmed10, Pawr                                                                                           | mmu-miR-124, mmu-miR-26a, mmu-miR-30e, mmu-miR-379, mmu-miR-384-5p |
| GO:0009108 | coenzyme biosynthetic process                    | Acss1, Dcakd, Fpgs, Mat2a                                                                                                                                    | mmu-miR-124, mmu-miR-26a, mmu-miR-30e, mmu-miR-384-5p              |
| GO:0009119 | ribonucleoside metabolic process                 | Nme4, Ocln, Dcakd, Mat2a, Pemt                                                                                                                               | mmu-miR-124, mmu-miR-26a, mmu-miR-30e, mmu-miR-384-5p              |
| GO:0009124 | nucleoside monophosphate biosynthetic process    | Edn1, Gnal, Adcy9, Ampd3, Gna13, Gnai1, Gnai2, Pde2a                                                                                                         | mmu-miR-124, mmu-miR-26a, mmu-miR-30e, mmu-miR-379, mmu-miR-384-5p |
| GO:0009146 | purine nucleoside triphosphate catabolic process | Epha3, Gnal, Myo1e, Arhgap17, At13, Bcl6, Abca2, Atp1a1, Epha2, Gna13, Gnai1, Gnai2, Pcyox1, Pip5k1a, Rab27a, Rasd2, Rgs9, Rhog, Rras, Tbc1d9b, Xrcc6        | mmu-miR-124, mmu-miR-26a, mmu-miR-30e, mmu-miR-384-5p              |
| GO:0009154 | purine ribonucleotide catabolic process          | Epha3, Gnal, Myo1e, Arhgap17, At13, Bcl6, Abca2, Atp1a1, Epha2, Gna13, Gnai1, Gnai2, Pcyox1, Pip5k1a, Rab27a, Rasd2, Rgs9, Rhog, Rras, Tbc1d9b, Xrcc6        | mmu-miR-124, mmu-miR-26a, mmu-miR-30e, mmu-miR-384-5p              |
| GO:0009166 | nucleotide catabolic process                     | Epha3, Gnal, Myo1e, Arhgap17, At13, Bcl6, Abca2, Atp1a1, Epha2, Gna13, Gnai1, Gnai2, Pcyox1, Pde2a, Pip5k1a, Rab27a, Rasd2, Rgs9, Rhog, Rras, Tbc1d9b, Xrcc6 | mmu-miR-124, mmu-miR-26a, mmu-miR-30e, mmu-miR-379, mmu-miR-384-5p |

|            |                                                       |                                                                                                                                                       |                                                                    |
|------------|-------------------------------------------------------|-------------------------------------------------------------------------------------------------------------------------------------------------------|--------------------------------------------------------------------|
| GO:0009203 | ribonucleoside triphosphate catabolic process         | Epha3, Gnal, Myo1e, Arhgap17, At13, Bcl6, Abca2, Atp1a1, Epha2, Gna13, Gnai1, Gnai2, Pcyox1, Pip5k1a, Rab27a, Rasd2, Rgs9, Rhog, Rras, Tbc1d9b, Xrcc6 | mmu-miR-124, mmu-miR-26a, mmu-miR-30e, mmu-miR-384-5p              |
| GO:0009306 | protein secretion                                     | Dnajc1, Adam9, Cbln4, Gpam, Rhbdf1, Steap3                                                                                                            | mmu-miR-124, mmu-miR-26a, mmu-miR-30e, mmu-miR-384-5p              |
| GO:0009792 | embryo development ending in birth or egg hatching    | Edn1, Rdh10, Sall4, Eya1, Myo1e, Pcdh8, Tet1, Lhx2, Apba3, Epha2, Gas1, Gna13, Hoxb1, Kif3a, Myh10, Ovol2, Plod3, Ror2, Sfrp5, Sox8                   | mmu-miR-124, mmu-miR-26a, mmu-miR-30e, mmu-miR-379, mmu-miR-384-5p |
| GO:0010591 | regulation of lamellipodium assembly                  | Epha2, Ssh3                                                                                                                                           | mmu-miR-124, mmu-miR-26a                                           |
| GO:0010648 | negative regulation of cell communication             | Bcl6, Aes, Akt1s1, Cav1, Epha2, Gas1, Gnai1, Gnai2, Lemd2, Ovol2, Rgs9, Ror2, Sfrp5, Sh3rf1, Snai2, Snx6, Twsg1, Fst, Pawr, Brap                      | mmu-miR-124, mmu-miR-26a, mmu-miR-30e, mmu-miR-379, mmu-miR-384-5p |
| GO:0010817 | regulation of hormone levels                          | Edn1, Rdh10, Apln, Atp1a1, Bmp6, Cpt1a, Fzd4, Hadh, Myo5a, Pim3, Sox8, Ppp3cb                                                                         | mmu-miR-124, mmu-miR-26a, mmu-miR-30e, mmu-miR-379, mmu-miR-384-5p |
| GO:0010837 | regulation of keratinocyte proliferation              | Ovol2, Snai2                                                                                                                                          | mmu-miR-124, mmu-miR-30e, mmu-miR-384-5p                           |
| GO:0010942 | positive regulation of cell death                     | Map3k1, Tcfap4, Bcl6, Anxa5, Cav1, Clip3, Cycs, Dapk1, Ern1, Htatip2, Nr4a1, Plekhf1, Rab27a, Rarg, Rxra, Sh3rf1, Steap3, Pawr, Rps6ka2, Ppp3cb       | mmu-miR-124, mmu-miR-26a, mmu-miR-30e, mmu-miR-379, mmu-miR-384-5p |
| GO:0010957 | negative regulation of vitamin D biosynthetic process | Snai2                                                                                                                                                 | mmu-miR-124, mmu-miR-30e, mmu-miR-384-5p                           |
| GO:0010975 | regulation of neuron projection development           | Epha3, Ttl, Ube2v2, Kalrn, Ache, Slit1, Sphk1, Ssh3, Sema3a                                                                                           | mmu-miR-124, mmu-miR-26a, mmu-miR-30e, mmu-miR-379, mmu-miR-384-5p |
| GO:0014028 | notochord formation                                   | Epha2                                                                                                                                                 | mmu-miR-124, mmu-miR-26a                                           |

|            |                                       |                                                                                                                                                             |                                                                    |
|------------|---------------------------------------|-------------------------------------------------------------------------------------------------------------------------------------------------------------|--------------------------------------------------------------------|
| GO:0014032 | neural crest cell development         | Edn1, Rdh10, Snai2                                                                                                                                          | mmu-miR-124, mmu-miR-30e, mmu-miR-379, mmu-miR-384-5p              |
| GO:0014826 | vein smooth muscle contraction        | Edn1, Ednrb                                                                                                                                                 | mmu-miR-124, mmu-miR-30e, mmu-miR-379, mmu-miR-384-5p              |
| GO:0014889 | muscle atrophy                        | Fbxo32                                                                                                                                                      | mmu-miR-30e, mmu-miR-379, mmu-miR-384-5p                           |
| GO:0015031 | protein transport                     | Bcl6, Rffl, Ap1m2, Apba3, Cadps, Clip3, Lman2l, Pip5k1a, Pttg1ip, Rab27a, Rab3d, Rufy1, Sdad1, Sec61a2, Sft2d2, Slc15a4, Snap29, Snx6, Tmed1, Tmed10, Vps35 | mmu-miR-124, mmu-miR-26a, mmu-miR-30e, mmu-miR-384-5p              |
| GO:0015833 | peptide transport                     | Edn1, Cpt1a, Hadh, Myo5a, Pim3, Slc15a4, Ppp3cb                                                                                                             | mmu-miR-124, mmu-miR-26a, mmu-miR-30e, mmu-miR-379, mmu-miR-384-5p |
| GO:0016032 | viral reproduction                    | Map3k1, Tcfap4, Rxra, Zkscan3, Zscan20                                                                                                                      | mmu-miR-124, mmu-miR-30e, mmu-miR-379, mmu-miR-384-5p              |
| GO:0016044 | cellular membrane organization        | Myo1e, Gria2, Ache, Cav1, Clip3, Dhcr24, Epha2, Flot1, Kif3a, Lpcat2, Myh10, Pip5k1a, Plekhf1, Rhog, Rufy1, Tmed10, Zmpste24                                | mmu-miR-124, mmu-miR-26a, mmu-miR-30e, mmu-miR-379, mmu-miR-384-5p |
| GO:0016311 | dephosphorylation                     | Ppm1f, Acp2, Eya1, Ctdsp1, Eya2, Ptprz1, Rcan1, Ssh3, Wdr81, Ptpn13, Ppp3cb                                                                                 | mmu-miR-124, mmu-miR-26a, mmu-miR-30e, mmu-miR-384-5p              |
| GO:0016331 | morphogenesis of embryonic epithelium | Rdh10, Sall4, Pcdh8, Lhx2, Ovol2, Sfrp5, Sox8                                                                                                               | mmu-miR-124, mmu-miR-30e, mmu-miR-384-5p                           |
| GO:0016477 | cell migration                        | Celsr3, Efnb1, Itga7, Mdk, Myh10, Ovol2, Rhbdf1, Slit1, Sox8, Abi2                                                                                          | mmu-miR-124, mmu-miR-26a, mmu-miR-30e, mmu-miR-384-5p              |
| GO:0016567 | protein ubiquitination                | Map3k1, Rasd2, Rnf135, Sphk1, Trib3, Ttc3, Ube2i, Ube4a, Ube2e3, Brap, Ube2ql1                                                                              | mmu-miR-124, mmu-miR-26a, mmu-miR-30e, mmu-miR-379, mmu-miR-384-5p |
| GO:0016576 | histone dephosphorylation             | Eya1, Eya2                                                                                                                                                  | mmu-miR-124, mmu-miR-30e, mmu-miR-384-5p                           |

|            |                                                       |                                                                                                                              |                                                                    |
|------------|-------------------------------------------------------|------------------------------------------------------------------------------------------------------------------------------|--------------------------------------------------------------------|
| GO:0018130 | heterocycle biosynthetic process                      | Edn1, Gnal, Nme4, Ak2, Adcy9, Aldh4a1, Ampd3, Atp1a1, Fpgs, Gna13, Gnai1, Gnai2, Mat2a, Pde2a, Slc25a13                      | mmu-miR-124, mmu-miR-26a, mmu-miR-30e, mmu-miR-379, mmu-miR-384-5p |
| GO:0018208 | peptidyl-proline modification                         | P4ha2, P4ha1, Fkbp3                                                                                                          | mmu-miR-124, mmu-miR-26a, mmu-miR-30e, mmu-miR-384-5p              |
| GO:0018401 | peptidyl-proline hydroxylation to 4-hydroxy-L-proline | P4ha2, P4ha1                                                                                                                 | mmu-miR-124, mmu-miR-30e, mmu-miR-384-5p                           |
| GO:0019216 | regulation of lipid metabolic process                 | Atp1a1, Bmp6, Gpam, Scd1, Slc27a1, Snai2                                                                                     | mmu-miR-124, mmu-miR-30e, mmu-miR-384-5p                           |
| GO:0019222 | regulation of metabolic process                       | Gria2, Kalrn, Ache, Apba3, Apln, Arhgef4, Cycs, Dhcr24, Gas2l1, Rcan1, Serinc2, Sh3rf1, Sos2, Spata13, Spock3, Wdr81, Ppp3cb | mmu-miR-124, mmu-miR-26a, mmu-miR-30e, mmu-miR-379, mmu-miR-384-5p |
| GO:0019637 | organophosphate metabolic process                     | Pip4k2a, Agpat5, Gpam, Lpcat2, Lpcat3, Pemt, Pip5k1a, Prdx6, Serinc2, Slc27a1                                                | mmu-miR-124, mmu-miR-30e, mmu-miR-384-5p                           |
| GO:0019932 | second-messenger-mediated signaling                   | Edn1, Gnal, Ednrb, Gna13, Gnai1, Gnai2, Itpr3, Pde2a, Rasd2, Rcan1, Sphk1                                                    | mmu-miR-124, mmu-miR-26a, mmu-miR-30e, mmu-miR-379, mmu-miR-384-5p |
| GO:0019933 | cAMP-mediated signaling                               | Gnal, Gna13, Gnai1, Gnai2, Pde2a, Rasd2                                                                                      | mmu-miR-124, mmu-miR-26a, mmu-miR-30e, mmu-miR-379, mmu-miR-384-5p |
| GO:0019934 | cGMP-mediated signaling                               | Ednrb, Pde2a                                                                                                                 | mmu-miR-124, mmu-miR-30e, mmu-miR-379, mmu-miR-384-5p              |
| GO:0021553 | olfactory nerve development                           | Dmd                                                                                                                          | mmu-miR-124, mmu-miR-30e, mmu-miR-384-5p                           |
| GO:0021602 | cranial nerve morphogenesis                           | Dmd, Hoxb1                                                                                                                   | mmu-miR-124, mmu-miR-30e, mmu-miR-384-5p                           |
| GO:0021629 | olfactory nerve structural organization               | Dmd                                                                                                                          | mmu-miR-124, mmu-miR-30e, mmu-miR-384-5p                           |

|            |                                        |                                                                                                                                                           |                                                                    |
|------------|----------------------------------------|-----------------------------------------------------------------------------------------------------------------------------------------------------------|--------------------------------------------------------------------|
| GO:0021904 | dorsal/ventral neural tube patterning  | Gas1, Kif3a                                                                                                                                               | mmu-miR-124, mmu-miR-30e, mmu-miR-384-5p                           |
| GO:0021915 | neural tube development                | Sall4, Lhx2, Epha2, Gas1, Kif3a, Ovol2, Plod3, Sfrp5                                                                                                      | mmu-miR-124, mmu-miR-26a, mmu-miR-30e, mmu-miR-384-5p              |
| GO:0022604 | regulation of cell morphogenesis       | Ttl, Ache, Brwd3, Gas2, Gna13, Myh10, Slit1, Ssh3, Ttc3, Sema3a                                                                                           | mmu-miR-124, mmu-miR-26a, mmu-miR-30e, mmu-miR-379, mmu-miR-384-5p |
| GO:0022612 | gland morphogenesis                    | Cav1, Epha2, Rarg, Rxra, Twsg1, Sema3a                                                                                                                    | mmu-miR-124, mmu-miR-26a, mmu-miR-30e, mmu-miR-379, mmu-miR-384-5p |
| GO:0023051 | regulation of signaling                | Ctnnd2, Gria2, Ache, Apln, Cpt1a, Hadh, Pim3, Ppp3cb                                                                                                      | mmu-miR-124, mmu-miR-26a, mmu-miR-30e, mmu-miR-379, mmu-miR-384-5p |
| GO:0023057 | negative regulation of signaling       | Bcl6, Aes, Akt1s1, Cav1, Epha2, Gas1, Gnai1, Gnai2, Lemd2, Ovol2, Rgs9, Ror2, Sfrp5, Sh3rf1, Snai2, Snx6, Twsg1, Fst, Pawr, Brap                          | mmu-miR-124, mmu-miR-26a, mmu-miR-30e, mmu-miR-379, mmu-miR-384-5p |
| GO:0030001 | metal ion transport                    | Cacnb2, Slc22a5, Atp1a1, Cacng5, Cav1, Gnai2, Itpr3, Kcnk10, Kcnk2, Kctd5, Kctd8, Myo5a, Nipa1, Ryr1, Scn7a, Slc1a4, Slc9a2, Slc9a9, Steap3, Stk39, Tpcn2 | mmu-miR-124, mmu-miR-26a, mmu-miR-30e, mmu-miR-384-5p              |
| GO:0030030 | cell projection organization           | Dmd, Epha3, Ttl, Lhx2, Ube2v2, Kalrn, Ache, Celsr3, Dlx5, Efhd1, Efnb1, Flot1, Gas1, Gsn, Ptpz1, Slit1, Sphk1, Abi2, Sema3a                               | mmu-miR-124, mmu-miR-26a, mmu-miR-30e, mmu-miR-379, mmu-miR-384-5p |
| GO:0030031 | cell projection assembly               | Arhgef4, Epha2, Kif3a, Pip5k1a, Poc1b, Prdx6, Spata13, Ssh3                                                                                               | mmu-miR-124, mmu-miR-26a, mmu-miR-30e, mmu-miR-384-5p              |
| GO:0030036 | actin cytoskeleton organization        | Edn1, Epha3, Bcl6, Inf2, Myh10, Pip5k1a, Rhog, Epb4.1l3                                                                                                   | mmu-miR-124, mmu-miR-26a, mmu-miR-30e, mmu-miR-379, mmu-miR-384-5p |
| GO:0030047 | actin modification                     | Twf1                                                                                                                                                      | mmu-miR-26a, mmu-miR-30e, mmu-miR-384-5p                           |
| GO:0030050 | vesicle transport along actin filament | Myo5a                                                                                                                                                     | mmu-miR-124, mmu-miR-30e, mmu-miR-384-5p                           |

|            |                                                            |                                                                                                                                                                    |                                                                    |
|------------|------------------------------------------------------------|--------------------------------------------------------------------------------------------------------------------------------------------------------------------|--------------------------------------------------------------------|
| GO:0030154 | cell differentiation                                       | Suv39h2, Fxr1, Adamts9, C1galt1, Dmrta1, Gna13, Htatif2, Kif2a, Mdk, Myo5a, Numa1, Nxn, Paqr8, Ppl, Rab27a, Ror2, Scd1, Sema6d, Sfrp5, Srpk3, Tbx19, Smad1, Ppp3cb | mmu-miR-124, mmu-miR-26a, mmu-miR-30e, mmu-miR-384-5p              |
| GO:0030155 | regulation of cell adhesion                                | Epha3, Ppm1f, Adam9, Bcl6, Epha2, Fzd4, Gsn, Sdc4, Snai2, Nid1                                                                                                     | mmu-miR-124, mmu-miR-26a, mmu-miR-30e, mmu-miR-384-5p              |
| GO:0030163 | protein catabolic process                                  | Edem3, Map3k1, Adam9, Ube2v2, Fbxo27, Pcyox1, Rhbdf1, Trib3, Ttc3, Ube2i, Usp1, Usp2, Usp30, Usp48, Yme11, Zmpste24, Erlin1                                        | mmu-miR-124, mmu-miR-26a, mmu-miR-30e, mmu-miR-379, mmu-miR-384-5p |
| GO:0030199 | collagen fibril organization                               | P4ha1, Acan, Plod3                                                                                                                                                 | mmu-miR-124, mmu-miR-30e, mmu-miR-384-5p                           |
| GO:0030318 | melanocyte differentiation                                 | Adamts9, Ednrb, Myo5a, Rab27a                                                                                                                                      | mmu-miR-124, mmu-miR-30e, mmu-miR-384-5p                           |
| GO:0030326 | embryonic limb morphogenesis                               | Rdh10, Sall4, Lnp, Dlx5, Gas1, Rarg                                                                                                                                | mmu-miR-124, mmu-miR-26a, mmu-miR-30e, mmu-miR-384-5p              |
| GO:0030334 | regulation of cell migration                               | Edn1, Map3k1, Ppm1f, Adam9, Fgfr1op, Acan, Dll4, Epha2, Gna13, Ror2, Rras, Snai2, Spata13, Sphk1, Sema3a                                                           | mmu-miR-124, mmu-miR-26a, mmu-miR-30e, mmu-miR-379, mmu-miR-384-5p |
| GO:0030497 | fatty acid elongation                                      | Elovl5, Pecer                                                                                                                                                      | mmu-miR-124, mmu-miR-30e, mmu-miR-384-5p                           |
| GO:0030509 | BMP signaling pathway                                      | Bmp6, Cav1, Twsg1, Fst, Smad1                                                                                                                                      | mmu-miR-124, mmu-miR-26a, mmu-miR-30e, mmu-miR-379, mmu-miR-384-5p |
| GO:0030516 | regulation of axon extension                               | Ttl, Slit1, Sema3a                                                                                                                                                 | mmu-miR-124, mmu-miR-30e, mmu-miR-379, mmu-miR-384-5p              |
| GO:0030800 | negative regulation of cyclic nucleotide metabolic process | Edn1, Gnai1, Gnai2, Pde2a                                                                                                                                          | mmu-miR-124, mmu-miR-30e, mmu-miR-379, mmu-miR-384-5p              |

|            |                                                                                       |                                                                             |                                                                    |
|------------|---------------------------------------------------------------------------------------|-----------------------------------------------------------------------------|--------------------------------------------------------------------|
| GO:0030802 | regulation of cyclic nucleotide biosynthetic process                                  | Edn1, Gnal, Adcy9, Gna13, Gnai1, Gnai2, Pde2a                               | mmu-miR-124, mmu-miR-26a, mmu-miR-30e, mmu-miR-379, mmu-miR-384-5p |
| GO:0030809 | negative regulation of nucleotide biosynthetic process                                | Edn1, Gnai1, Gnai2, Pde2a                                                   | mmu-miR-124, mmu-miR-30e, mmu-miR-379, mmu-miR-384-5p              |
| GO:0030814 | regulation of cAMP metabolic process                                                  | Edn1, Gnal, Adcy9, Gna13, Gnai1, Gnai2, Pde2a                               | mmu-miR-124, mmu-miR-26a, mmu-miR-30e, mmu-miR-379, mmu-miR-384-5p |
| GO:0030818 | negative regulation of cAMP biosynthetic process                                      | Edn1, Gnai1, Gnai2, Pde2a                                                   | mmu-miR-124, mmu-miR-30e, mmu-miR-379, mmu-miR-384-5p              |
| GO:0030832 | regulation of actin filament length                                                   | Map3k1, Twf1, Arpc1b, Gsn, Ssh3                                             | mmu-miR-124, mmu-miR-26a, mmu-miR-30e, mmu-miR-379, mmu-miR-384-5p |
| GO:0030833 | regulation of actin filament polymerization                                           | Map3k1, Twf1, Arpc1b, Gsn                                                   | mmu-miR-124, mmu-miR-26a, mmu-miR-30e, mmu-miR-379, mmu-miR-384-5p |
| GO:0030857 | negative regulation of epithelial cell differentiation                                | Cav1, Ovol2                                                                 | mmu-miR-124, mmu-miR-30e, mmu-miR-384-5p                           |
| GO:0031325 | positive regulation of cellular metabolic process                                     | Edn1, Apln, Cav1, Clip3, Ednrb, Gpam, Pemt, Rasd2, Scd1, Snai2, Sphk1, Pawr | mmu-miR-124, mmu-miR-26a, mmu-miR-30e, mmu-miR-379, mmu-miR-384-5p |
| GO:0031331 | positive regulation of cellular catabolic process                                     | Adam9, Ube2v2, Cpt1a, Mtdh, Trib3                                           | mmu-miR-124, mmu-miR-26a, mmu-miR-30e, mmu-miR-384-5p              |
| GO:0031585 | regulation of inositol 1,4,5-trisphosphate-sensitive calcium-release channel activity | Myo5a                                                                       | mmu-miR-124, mmu-miR-30e, mmu-miR-384-5p                           |



|            |                                                      |                                                                                                           |                                                                    |
|------------|------------------------------------------------------|-----------------------------------------------------------------------------------------------------------|--------------------------------------------------------------------|
| GO:0031667 | response to nutrient levels                          | Epha3, Gdap2, Agl, Gas2l1, Pemt, Rarg, Rxra, Snai2                                                        | mmu-miR-124, mmu-miR-30e, mmu-miR-384-5p                           |
| GO:0031987 | locomotion involved in locomotory behavior           | Fzd4, Myo5a                                                                                               | mmu-miR-124, mmu-miR-30e, mmu-miR-384-5p                           |
| GO:0032231 | regulation of actin filament bundle assembly         | Map3k1, Ppm1f, Sdc4                                                                                       | mmu-miR-124, mmu-miR-30e, mmu-miR-379, mmu-miR-384-5p              |
| GO:0032272 | negative regulation of protein polymerization        | Twf1, Clip3, Gsn                                                                                          | mmu-miR-124, mmu-miR-26a, mmu-miR-30e, mmu-miR-384-5p              |
| GO:0032319 | regulation of Rho GTPase activity                    | Epha3, Bcl6, Epha2, Pip5k1a, Rhog                                                                         | mmu-miR-124, mmu-miR-26a, mmu-miR-30e, mmu-miR-384-5p              |
| GO:0032331 | negative regulation of chondrocyte differentiation   | Rarg, Snai2                                                                                               | mmu-miR-124, mmu-miR-30e, mmu-miR-384-5p                           |
| GO:0032400 | melanosome localization                              | Myo5a, Rab27a                                                                                             | mmu-miR-124, mmu-miR-30e, mmu-miR-384-5p                           |
| GO:0032402 | melanosome transport                                 | Myo5a, Rab27a                                                                                             | mmu-miR-124, mmu-miR-30e, mmu-miR-384-5p                           |
| GO:0032526 | response to retinoic acid                            | Epha3, Gdap2, Rarg, Rxra                                                                                  | mmu-miR-124, mmu-miR-30e, mmu-miR-384-5p                           |
| GO:0032728 | positive regulation of interferon-beta production    | Polr3g, Rnf135                                                                                            | mmu-miR-124, mmu-miR-30e, mmu-miR-384-5p                           |
| GO:0032764 | negative regulation of mast cell cytokine production | Bcl6                                                                                                      | mmu-miR-124, mmu-miR-30e, mmu-miR-384-5p                           |
| GO:0032787 | monocarboxylic acid metabolic process                | Edn1, P4ha2, Rdh10, Scd2, Fa2h, P4ha1, Cav1, Cyb5, Elovl5, Gpam, Myo5a, Pocr, Scd1, Slc27a1, Sphk1, Trib3 | mmu-miR-124, mmu-miR-26a, mmu-miR-30e, mmu-miR-379, mmu-miR-384-5p |

|            |                                                                   |                                                                                                                      |                                                                    |
|------------|-------------------------------------------------------------------|----------------------------------------------------------------------------------------------------------------------|--------------------------------------------------------------------|
| GO:0032836 | glomerular basement membrane development                          | Myo1e, Nid1                                                                                                          | mmu-miR-124, mmu-miR-26a, mmu-miR-30e, mmu-miR-384-5p              |
| GO:0032844 | regulation of homeostatic process                                 | Edn1, Slc22a5, Apln, Cav1, Ednrb, Gas2l1, Gpam, Pim3, Ryr1, Slc27a1, Tpcn2, Ppp3cb                                   | mmu-miR-124, mmu-miR-26a, mmu-miR-30e, mmu-miR-379, mmu-miR-384-5p |
| GO:0032856 | activation of Ras GTPase activity                                 | Epha2, Pip5k1a, Rhog                                                                                                 | mmu-miR-124, mmu-miR-26a                                           |
| GO:0032863 | activation of Rac GTPase activity                                 | Epha2, Pip5k1a, Rhog                                                                                                 | mmu-miR-124, mmu-miR-26a                                           |
| GO:0032970 | regulation of actin filament-based process                        | Edn1, Epha3, Map3k1, Ppm1f, Twf1, Arpc1b, Gsn, Sdc4, Ssh3                                                            | mmu-miR-124, mmu-miR-26a, mmu-miR-30e, mmu-miR-379, mmu-miR-384-5p |
| GO:0032989 | cellular component morphogenesis                                  | Edn1, Bcl6, Brwd3, Epha2, Fzd4, Gas2, Gna13, Plod3, Snai2, Ttc3                                                      | mmu-miR-124, mmu-miR-26a, mmu-miR-30e, mmu-miR-379, mmu-miR-384-5p |
| GO:0032990 | cell part morphogenesis                                           | Dmd, Ttl, Lhx2, Kalrn, Ache, Celsr3, Dlx5, Efnb1, Flot1, Gas1, Gsn, Kif3a, Myh10, Poc1b, Ptprz1, Slit1, Ssh3, Sema3a | mmu-miR-124, mmu-miR-26a, mmu-miR-30e, mmu-miR-379, mmu-miR-384-5p |
| GO:0033043 | regulation of organelle organization                              | Edn1, Epha3, Map3k1, Ppm1f, Tet1, Twf1, Arpc1b, Cav1, Clip3, Gas2l1, Gsn, Sdc4, Snai2, Ssh3, Surf4                   | mmu-miR-124, mmu-miR-26a, mmu-miR-30e, mmu-miR-379, mmu-miR-384-5p |
| GO:0033159 | negative regulation of protein import into nucleus, translocation | Pde2a                                                                                                                | mmu-miR-124, mmu-miR-379                                           |
| GO:0033273 | response to vitamin                                               | Epha3, Gdap2, Pemt, Rarg, Rxra, Snai2                                                                                | mmu-miR-124, mmu-miR-30e, mmu-miR-384-5p                           |
| GO:0034241 | positive regulation of macrophage fusion                          | Adam9                                                                                                                | mmu-miR-26a, mmu-miR-30e, mmu-miR-384-5p                           |
| GO:0034329 | cell junction assembly                                            | Epha3, Ppm1f, Pip5k1a, Sdc4, Snai2                                                                                   | mmu-miR-124, mmu-miR-30e, mmu-miR-384-5p                           |

|            |                                                     |                                                                                                                          |                                                                    |
|------------|-----------------------------------------------------|--------------------------------------------------------------------------------------------------------------------------|--------------------------------------------------------------------|
| GO:0034654 | nucleobase-containing compound biosynthetic process | Edn1, Gnal, Nme4, Ak2, Adcy9, Ampd3, Atp1a1, Gna13, Gnai1, Gnai2, Mat2a, Pde2a, Slc25a13                                 | mmu-miR-124, mmu-miR-26a, mmu-miR-30e, mmu-miR-379, mmu-miR-384-5p |
| GO:0034765 | regulation of ion transmembrane transport           | Cacnb2, Cacng5, Clic6, Gnai2, Kcnk2, Kctd5, Kctd8, Myo5a, Scn7a, Tpcn2                                                   | mmu-miR-124, mmu-miR-30e, mmu-miR-384-5p                           |
| GO:0035023 | regulation of Rho protein signal transduction       | Kalrn, Arhgef4, Flot1, Sos2, Spata13                                                                                     | mmu-miR-124, mmu-miR-26a, mmu-miR-30e, mmu-miR-384-5p              |
| GO:0035107 | appendage morphogenesis                             | Rdh10, Sall4, Lnp, Dlx5, Gas1, Rarg                                                                                      | mmu-miR-124, mmu-miR-26a, mmu-miR-30e, mmu-miR-384-5p              |
| GO:0035121 | tail morphogenesis                                  | Epha2, Sfrp5                                                                                                             | mmu-miR-124, mmu-miR-26a                                           |
| GO:0035239 | tube morphogenesis                                  | Edn1, Rdh10, Sall4, Eya1, Lhx2, Epha2, Gna13, Ovol2, Sfrp5, Sox8                                                         | mmu-miR-124, mmu-miR-26a, mmu-miR-30e, mmu-miR-379, mmu-miR-384-5p |
| GO:0035414 | negative regulation of catenin import into nucleus  | Sfrp5, Snai2                                                                                                             | mmu-miR-124, mmu-miR-30e, mmu-miR-384-5p                           |
| GO:0035637 | multicellular organismal signaling                  | Dmd, Edn1, Cacnb2, Pcdh8, Ctnnd2, Gria2, Ube2v2, Ache, Aldh9a1, Apba3, Cadps, Gnai1, Gnai2, Myo5a, Rasd2, Slc29a1, Sphk1 | mmu-miR-124, mmu-miR-26a, mmu-miR-30e, mmu-miR-379, mmu-miR-384-5p |
| GO:0035645 | enteric smooth muscle cell differentiation          | Ednrb                                                                                                                    | mmu-miR-124, mmu-miR-30e, mmu-miR-384-5p                           |
| GO:0035690 | cellular response to drug                           | Ppm1f, Pde2a, Ppp3cb                                                                                                     | mmu-miR-124, mmu-miR-26a, mmu-miR-30e, mmu-miR-379, mmu-miR-384-5p |
| GO:0035810 | positive regulation of urine volume                 | Edn1, Ednrb                                                                                                              | mmu-miR-124, mmu-miR-30e, mmu-miR-379, mmu-miR-384-5p              |
| GO:0035815 | positive regulation of renal sodium excretion       | Edn1, Ednrb                                                                                                              | mmu-miR-124, mmu-miR-30e, mmu-miR-379, mmu-miR-384-5p              |

|            |                                       |                                                                                                                 |                                                                    |
|------------|---------------------------------------|-----------------------------------------------------------------------------------------------------------------|--------------------------------------------------------------------|
| GO:0035921 | desmosome disassembly                 | Snai2                                                                                                           | mmu-miR-124, mmu-miR-30e, mmu-miR-384-5p                           |
| GO:0035964 | COPI-coated vesicle budding           | Tmed10                                                                                                          | mmu-miR-124, mmu-miR-26a, mmu-miR-30e, mmu-miR-384-5p              |
| GO:0040008 | regulation of growth                  | Ppm1f, Ttl, Bcl6, Fgfr1op, Aes, Gas1, Gas2l1, Gpam, Scd1, Sfrp5, Slit1, Sphk1, Tmem8b, Ube2e3, Sema3a           | mmu-miR-124, mmu-miR-30e, mmu-miR-379, mmu-miR-384-5p              |
| GO:0040012 | regulation of locomotion              | Edn1, Map3k1, Ppm1f, Adam9, Fgfr1op, Acan, Dll4, Epha2, Gna13, Ror2, Rras, Slit1, Snai2, Spata13, Sphk1, Sema3a | mmu-miR-124, mmu-miR-26a, mmu-miR-30e, mmu-miR-379, mmu-miR-384-5p |
| GO:0042045 | epithelial fluid transport            | Edn1, Ednrb                                                                                                     | mmu-miR-124, mmu-miR-30e, mmu-miR-379, mmu-miR-384-5p              |
| GO:0042117 | monocyte activation                   | Adam9                                                                                                           | mmu-miR-26a, mmu-miR-30e, mmu-miR-384-5p                           |
| GO:0042275 | error-free postreplication DNA repair | Ube2v2                                                                                                          | mmu-miR-124, mmu-miR-30e, mmu-miR-384-5p                           |
| GO:0042278 | purine nucleoside metabolic process   | Ocln, Dcakd, Mat2a, Pemt                                                                                        | mmu-miR-124, mmu-miR-26a, mmu-miR-30e, mmu-miR-384-5p              |
| GO:0042310 | vasoconstriction                      | Edn1, Apln, Cav1, Ednrb                                                                                         | mmu-miR-124, mmu-miR-30e, mmu-miR-379, mmu-miR-384-5p              |
| GO:0042330 | taxis                                 | Edn1, Ppm1f, Lhx2, Dlx5, Ednrb, Efnb1, Epha2, Flot1, Gas1, Myh10, Nr4a1, Pip5k1a, Rhog, Slit1, Sema3a           | mmu-miR-124, mmu-miR-26a, mmu-miR-30e, mmu-miR-379, mmu-miR-384-5p |
| GO:0042474 | middle ear morphogenesis              | Edn1, Eya1, Gas1                                                                                                | mmu-miR-124, mmu-miR-379                                           |
| GO:0042493 | response to drug                      | Slc22a5, Abcc4, Atp1a1, Hadh, Hadha, Mat2a, Pemt, Smad1                                                         | mmu-miR-124, mmu-miR-26a, mmu-miR-30e, mmu-miR-379, mmu-miR-384-5p |
| GO:0042692 | muscle cell differentiation           | Edn1, Barx2, Ednrb, Lemd2, Myh10, Rcan1, Rxra, Ryr1, Snta1, Sox8                                                | mmu-miR-124, mmu-miR-30e, mmu-miR-379, mmu-miR-384-5p              |

|            |                                                                       |                                                                                                                                        |                                                                    |
|------------|-----------------------------------------------------------------------|----------------------------------------------------------------------------------------------------------------------------------------|--------------------------------------------------------------------|
| GO:0042759 | long-chain fatty acid biosynthetic process                            | Elovl5, Myo5a                                                                                                                          | mmu-miR-124, mmu-miR-30e, mmu-miR-384-5p                           |
| GO:0042851 | L-alanine metabolic process                                           | Gpt2                                                                                                                                   | mmu-miR-124, mmu-miR-30e, mmu-miR-384-5p                           |
| GO:0042981 | regulation of apoptotic process                                       | 2610018G03Rik, Bcl2l13, Htatip2, Mdk, Rilpl1                                                                                           | mmu-miR-124, mmu-miR-30e, mmu-miR-384-5p                           |
| GO:0042986 | positive regulation of amyloid precursor protein biosynthetic process | Pawr                                                                                                                                   | mmu-miR-26a, mmu-miR-30e, mmu-miR-384-5p                           |
| GO:0042987 | amyloid precursor protein catabolic process                           | Dhcr24, Tmed10                                                                                                                         | mmu-miR-124, mmu-miR-26a, mmu-miR-30e, mmu-miR-384-5p              |
| GO:0043010 | camera-type eye development                                           | Map3k1, Rdh10, Ache, Epha2, Fzd4, Gas1, Myh10, Sox8, Twsg1, Abi2, Mab2111                                                              | mmu-miR-124, mmu-miR-26a, mmu-miR-30e, mmu-miR-379, mmu-miR-384-5p |
| GO:0043065 | positive regulation of apoptotic process                              | Map3k1, Tcfap4, Bcl6, Anxa5, Cav1, Clip3, Cycs, Dapk1, Ern1, Nr4a1, Plekhf1, Rab27a, Rarg, Rxra, Sh3rf1, Steap3, Pawr, Rps6ka2, Ppp3cb | mmu-miR-124, mmu-miR-26a, mmu-miR-30e, mmu-miR-379, mmu-miR-384-5p |
| GO:0043066 | negative regulation of apoptotic process                              | Edn1, Eya1, Tcfap4, Pdcd10, Bcl6, Ube2v2, Akt1s1, Cav1, Dapk1, Dhcr24, Ednrb, Gas1, Gpam, Mtdh, Pim3, Sh3rf1, Snai2, Sox8, Sphk1       | mmu-miR-124, mmu-miR-26a, mmu-miR-30e, mmu-miR-379, mmu-miR-384-5p |
| GO:0043112 | receptor metabolic process                                            | Dmd, Edn1, Gria2, Ache, Cav1                                                                                                           | mmu-miR-124, mmu-miR-30e, mmu-miR-379, mmu-miR-384-5p              |
| GO:0043506 | regulation of JUN kinase activity                                     | Edn1, Map3k1, Fzd4, Sfrp5                                                                                                              | mmu-miR-124, mmu-miR-30e, mmu-miR-379, mmu-miR-384-5p              |
| GO:0043538 | regulation of actin phosphorylation                                   | Twf1                                                                                                                                   | mmu-miR-26a, mmu-miR-30e, mmu-miR-384-5p                           |
| GO:0043549 | regulation of kinase activity                                         | Edn1, Map3k1, Ppm1f, Tcfap4, Pdcd10, Adam9, Fgfr1op, Akt1s1, Cav1, Ern1, Fzd4, Gnai2, Sdc4, Sfrp5, Slc27a1, Sphk1, Trib3               | mmu-miR-124, mmu-miR-26a, mmu-miR-30e, mmu-miR-379, mmu-miR-384-5p |

|            |                                                        |                                                                                                                     |                                                                    |
|------------|--------------------------------------------------------|---------------------------------------------------------------------------------------------------------------------|--------------------------------------------------------------------|
| GO:0043632 | modification-dependent macromolecule catabolic process | Edem3, Map3k1, Ube2v2, Pcyox1, Trib3, Ttc3, Ube2i, Usp1, Usp2, Usp30, Usp48, Zmpste24, Erlin1                       | mmu-miR-124, mmu-miR-26a, mmu-miR-30e, mmu-miR-379, mmu-miR-384-5p |
| GO:0044087 | regulation of cellular component biogenesis            | Edn1, Twf1, Ube2v2, Arpc1b, Cav1, Clip3, Epha2, Gsn, Snai2, Ssh3                                                    | mmu-miR-124, mmu-miR-26a, mmu-miR-30e, mmu-miR-379, mmu-miR-384-5p |
| GO:0044249 | cellular biosynthetic process                          | Rdh10, Scd2, Fa2h, Dgat2, Acss1, Aldh9a1, B4galt6, Dcakd, Elovl5, Mtr, Myo5a, Pecn, Scd1                            | mmu-miR-124, mmu-miR-26a, mmu-miR-30e, mmu-miR-384-5p              |
| GO:0044255 | cellular lipid metabolic process                       | Edn1, Rdh10, Scd2, Fa2h, Lass2, B4galt6, Cyb5, Elovl5, Lpcat3, Myo5a, Pecn, Scd1, Sphk1, Trib3                      | mmu-miR-124, mmu-miR-26a, mmu-miR-30e, mmu-miR-379, mmu-miR-384-5p |
| GO:0044283 | small molecule biosynthetic process                    | Edn1, Scd2, Fa2h, Acadvl, Acss1, Aldh4a1, Elovl5, Fpgs, Mat2a, Mtr, Myo5a, Pecn, Scd1, Slc27a1, Snai2, Sphk1, Trib3 | mmu-miR-124, mmu-miR-26a, mmu-miR-30e, mmu-miR-379, mmu-miR-384-5p |
| GO:0045137 | development of primary sexual characteristics          | Cbx2, Rdh10, Bmp6, Dhcr24, Fzd4, Sfrp5, Sox8, Fst                                                                   | mmu-miR-124, mmu-miR-30e, mmu-miR-379, mmu-miR-384-5p              |
| GO:0045446 | endothelial cell differentiation                       | Bmp6, Pde2a, Plod3                                                                                                  | mmu-miR-124, mmu-miR-379                                           |
| GO:0045596 | negative regulation of cell differentiation            | Tet1, Bcl6, Ctdsp1, Gas2l1, Rcan1, Slit1, Sox8, Trib3, Ttc3, Twsg1, Fst, Sema3a                                     | mmu-miR-124, mmu-miR-26a, mmu-miR-30e, mmu-miR-379, mmu-miR-384-5p |
| GO:0045664 | regulation of neuron differentiation                   | Eya1, Bmp6, Ctdsp1, Ednrb, Sox8, Ttc3                                                                               | mmu-miR-124, mmu-miR-30e, mmu-miR-384-5p                           |
| GO:0045667 | regulation of osteoblast differentiation               | Bmp6, Dlx5, Snai2, Twsg1, Smad1                                                                                     | mmu-miR-124, mmu-miR-26a, mmu-miR-30e, mmu-miR-384-5p              |
| GO:0045761 | regulation of adenylate cyclase activity               | Gnal, Adcy9, Gna13, Gnai1, Gnai2                                                                                    | mmu-miR-124, mmu-miR-26a, mmu-miR-30e, mmu-miR-384-5p              |

|            |                                                  |                                                                                                            |                                                                    |
|------------|--------------------------------------------------|------------------------------------------------------------------------------------------------------------|--------------------------------------------------------------------|
| GO:0045933 | positive regulation of muscle contraction        | Edn1, Atp1a1, Sphk1                                                                                        | mmu-miR-124, mmu-miR-379                                           |
| GO:0045939 | negative regulation of steroid metabolic process | Atp1a1, Snai2                                                                                              | mmu-miR-124, mmu-miR-30e, mmu-miR-384-5p                           |
| GO:0046394 | carboxylic acid biosynthetic process             | Aldh4a1, Fpgs, Mat2a, Mtr, Slc27a1                                                                         | mmu-miR-124, mmu-miR-26a, mmu-miR-30e, mmu-miR-384-5p              |
| GO:0046486 | glycerolipid metabolic process                   | Pip4k2a, Dgat2, Agpat5, Cav1, Cpt1a, Gpam, Lipe, Lpcat2, Pemt, Pip5k1a, Serinc2, Slc27a1                   | mmu-miR-124, mmu-miR-30e, mmu-miR-384-5p                           |
| GO:0046498 | S-adenosylhomocysteine metabolic process         | Ocln, Pemt                                                                                                 | mmu-miR-124, mmu-miR-26a, mmu-miR-30e, mmu-miR-384-5p              |
| GO:0046500 | S-adenosylmethionine metabolic process           | Ocln, Mat2a, Pemt                                                                                          | mmu-miR-124, mmu-miR-26a, mmu-miR-30e, mmu-miR-384-5p              |
| GO:0046879 | hormone secretion                                | Edn1, Apln, Cpt1a, Fzd4, Hadh, Myo5a, Pim3, Ppp3cb                                                         | mmu-miR-124, mmu-miR-26a, mmu-miR-30e, mmu-miR-379, mmu-miR-384-5p |
| GO:0048066 | developmental pigmentation                       | Adamts9, Ednrb, Myo5a, Rab27a                                                                              | mmu-miR-124, mmu-miR-30e, mmu-miR-384-5p                           |
| GO:0048468 | cell development                                 | Dmd, Rdh10, Myo1e, Tet1, Pip4k2a, Bcl6, Acan, Efhd1, Ovol2, Pde2a, Rarg, Rcan1, Ryr1, Snta1, Abi2, Rps6ka2 | mmu-miR-124, mmu-miR-26a, mmu-miR-30e, mmu-miR-379, mmu-miR-384-5p |
| GO:0048484 | enteric nervous system development               | Ednrb, Sox8                                                                                                | mmu-miR-124, mmu-miR-30e, mmu-miR-384-5p                           |
| GO:0048532 | anatomical structure arrangement                 | Dmd, Hoxb1                                                                                                 | mmu-miR-124, mmu-miR-30e, mmu-miR-384-5p                           |
| GO:0048545 | response to steroid hormone stimulus             | Tcfap4, Adam9, Agl, Cav1, Nr4a1, Rarg, Rcan1, Rxra                                                         | mmu-miR-124, mmu-miR-26a, mmu-miR-30e, mmu-miR-384-5p              |

|            |                                                                 |                                                                                                                                          |                                                                    |
|------------|-----------------------------------------------------------------|------------------------------------------------------------------------------------------------------------------------------------------|--------------------------------------------------------------------|
| GO:0048562 | embryonic organ morphogenesis                                   | Edn1, Rdh10, Eya1, Dlx5, Epha2, Gas1, Hoxb1, Ovol2, Rarg, Ror2                                                                           | mmu-miR-124, mmu-miR-26a, mmu-miR-30e, mmu-miR-379, mmu-miR-384-5p |
| GO:0048585 | negative regulation of response to stimulus                     | Bcl6, Aes, Akt1s1, Cav1, Epha2, Gas1, Lemd2, Ovol2, Rgs9, Ror2, Sfrp5, Sh3rf1, Slit1, Snai2, Snx6, Twsg1, Fst, Sem3a, Pawr, Ppp3cb, Brap | mmu-miR-124, mmu-miR-26a, mmu-miR-30e, mmu-miR-379, mmu-miR-384-5p |
| GO:0048589 | developmental growth                                            | Rdh10, Sall4, Ttl, Gas1, Myo5a, Rarg, Sfrp5, Slit1, Sem3a                                                                                | mmu-miR-124, mmu-miR-30e, mmu-miR-379, mmu-miR-384-5p              |
| GO:0048608 | reproductive structure development                              | Rdh10, Slc22a5, Fzd4, Rarg, Rxra, Sfrp5, Sox8, Fst                                                                                       | mmu-miR-124, mmu-miR-30e, mmu-miR-379, mmu-miR-384-5p              |
| GO:0048646 | anatomical structure formation involved in morphogenesis        | Rdh10, Sall4, Eya1, Pcdh8, Tet1, Adam9, Lhx2, Dlx5, Hoxb1, Kif3a, Myh10, Poc1b, Ror2, Sfrp5, Snai2, Sox8, Twsg1, Smad1                   | mmu-miR-124, mmu-miR-26a, mmu-miR-30e, mmu-miR-384-5p              |
| GO:0048667 | cell morphogenesis involved in neuron differentiation           | Ttl, Lhx2, Kalrn, Ache, Celsr3, Dlx5, Efnb1, Flot1, Gas1, Myh10, Ptpz1, Slit1, Ssh3, Sem3a                                               | mmu-miR-124, mmu-miR-26a, mmu-miR-30e, mmu-miR-379, mmu-miR-384-5p |
| GO:0048705 | skeletal system morphogenesis                                   | Rdh10, Eya1, Bmp6, Dlx5, Gas1, Hoxb1, Rarg                                                                                               | mmu-miR-124, mmu-miR-30e, mmu-miR-384-5p                           |
| GO:0048729 | tissue morphogenesis                                            | Edn1, Rdh10, Sall4, Eya1, Pcdh8, Lhx2, Epha2, Gna13, Ovol2, Plod3, Rarg, Ror2, Rxra, Sfrp5, Snai2, Sox8, Twsg1, Fst, Sem3a, Smad1        | mmu-miR-124, mmu-miR-26a, mmu-miR-30e, mmu-miR-379, mmu-miR-384-5p |
| GO:0048762 | mesenchymal cell differentiation                                | Edn1, Rdh10, Ednrb, Efnb1, Ovol2, Snai2, Sox8                                                                                            | mmu-miR-124, mmu-miR-30e, mmu-miR-379, mmu-miR-384-5p              |
| GO:0048812 | neuron projection morphogenesis                                 | Dmd, Ttl, Lhx2, Kalrn, Ache, Celsr3, Dlx5, Efnb1, Flot1, Gas1, Myh10, Ptpz1, Slit1, Ssh3, Sem3a                                          | mmu-miR-124, mmu-miR-26a, mmu-miR-30e, mmu-miR-379, mmu-miR-384-5p |
| GO:0048820 | hair follicle maturation                                        | Barx2, Myo5a                                                                                                                             | mmu-miR-124, mmu-miR-30e, mmu-miR-384-5p                           |
| GO:0048843 | negative regulation of axon extension involved in axon guidance | Slit1, Sem3a                                                                                                                             | mmu-miR-124, mmu-miR-30e, mmu-miR-379, mmu-miR-384-5p              |



|            |                                                         |                                                                                                                       |                                                                    |
|------------|---------------------------------------------------------|-----------------------------------------------------------------------------------------------------------------------|--------------------------------------------------------------------|
| GO:0048856 | anatomical structure development                        | Pcdh8, Adam9, Ctnnd2, Lnp, Brwd3, Eya2, Gas2, Gsn, Poc1b                                                              | mmu-miR-124, mmu-miR-26a, mmu-miR-30e, mmu-miR-384-5p              |
| GO:0050434 | positive regulation of viral transcription              | Map3k1, Tcfap4                                                                                                        | mmu-miR-124, mmu-miR-30e, mmu-miR-379, mmu-miR-384-5p              |
| GO:0050872 | white fat cell differentiation                          | Scd1, Snai2                                                                                                           | mmu-miR-124, mmu-miR-30e, mmu-miR-384-5p                           |
| GO:0050878 | regulation of body fluid levels                         | Edn1, Lnp, Anxa5, Apln, Cav1, Ednrb, Gna13, Rab27a                                                                    | mmu-miR-124, mmu-miR-26a, mmu-miR-30e, mmu-miR-379, mmu-miR-384-5p |
| GO:0050886 | endocrine process                                       | Edn1, Apln, Fzd4, Rps6ka2                                                                                             | mmu-miR-124, mmu-miR-26a, mmu-miR-30e, mmu-miR-379, mmu-miR-384-5p |
| GO:0050919 | negative chemotaxis                                     | Slit1, Sema3a                                                                                                         | mmu-miR-124, mmu-miR-30e, mmu-miR-379, mmu-miR-384-5p              |
| GO:0051046 | regulation of secretion                                 | Dnajc1, Edn1, Adam9, Apln, Cadps, Cpt1a, Ednrb, Gpam, Hadh, Myo5a, Pim3, Rab27a, Rab3d, Rhbdf1, Sphk1, Ppp3cb         | mmu-miR-124, mmu-miR-26a, mmu-miR-30e, mmu-miR-379, mmu-miR-384-5p |
| GO:0051049 | regulation of transport                                 | Cacnb2, Abca2, Atp1a1, Cacng5, Clic6, Gnai2, Kcnk2, Kctd5, Kctd8, Scn7a, Stk39, Tpcn2, Trib3                          | mmu-miR-124, mmu-miR-26a, mmu-miR-30e, mmu-miR-384-5p              |
| GO:0051055 | negative regulation of lipid biosynthetic process       | Atp1a1, Slc27a1, Snai2                                                                                                | mmu-miR-124, mmu-miR-30e, mmu-miR-384-5p                           |
| GO:0051056 | regulation of small GTPase mediated signal transduction | Epha3, Bcl6, Kalrn, Arhgef4, Epha2, Flot1, Pip5k1a, Rhog, Sos2, Spata13, Tbc1d9b                                      | mmu-miR-124, mmu-miR-26a, mmu-miR-30e, mmu-miR-384-5p              |
| GO:0051223 | regulation of protein transport                         | Dnajc1, Adam9, Gpam, Lcp1, Pde2a, Rhbdf1, Sfrp5, Snai2, Sphk1                                                         | mmu-miR-124, mmu-miR-26a, mmu-miR-30e, mmu-miR-379, mmu-miR-384-5p |
| GO:0051270 | regulation of cellular component movement               | Edn1, Map3k1, Ppm1f, Adam9, Bcl6, Fgfr1op, Acan, Dll4, Epha2, Gna13, Ror2, Rras, Slit1, Snai2, Spata13, Sphk1, Sema3a | mmu-miR-124, mmu-miR-26a, mmu-miR-30e, mmu-miR-379, mmu-miR-384-5p |

|            |                                                            |                                                                                                                              |                                                                    |
|------------|------------------------------------------------------------|------------------------------------------------------------------------------------------------------------------------------|--------------------------------------------------------------------|
| GO:0051384 | response to glucocorticoid stimulus                        | Tcfap4, Adam9, Agl, Rxra                                                                                                     | mmu-miR-124, mmu-miR-26a, mmu-miR-30e, mmu-miR-384-5p              |
| GO:0051494 | negative regulation of cytoskeleton organization           | Map3k1, Twf1, Clip3, Gas2l1, Gsn                                                                                             | mmu-miR-124, mmu-miR-26a, mmu-miR-30e, mmu-miR-379, mmu-miR-384-5p |
| GO:0051495 | positive regulation of cytoskeleton organization           | Edn1, Map3k1, Ppm1f, Cav1, Sdc4                                                                                              | mmu-miR-124, mmu-miR-30e, mmu-miR-379, mmu-miR-384-5p              |
| GO:0051592 | response to calcium ion                                    | Adam9, Cav1, Itpr3, Slc25a13                                                                                                 | mmu-miR-124, mmu-miR-26a, mmu-miR-30e, mmu-miR-384-5p              |
| GO:0051603 | proteolysis involved in cellular protein catabolic process | Edem3, Map3k1, Ube2v2, Pcyox1, Rhbdf1, Trib3, Ttc3, Ube2i, Usp1, Usp2, Usp30, Usp48, Zmpste24, Erlin1                        | mmu-miR-124, mmu-miR-26a, mmu-miR-30e, mmu-miR-379, mmu-miR-384-5p |
| GO:0051604 | protein maturation                                         | Capn1, Dhcr24, Gas1, Vps35, Rps6ka2                                                                                          | mmu-miR-124, mmu-miR-26a, mmu-miR-30e, mmu-miR-384-5p              |
| GO:0051643 | endoplasmic reticulum localization                         | Myo5a                                                                                                                        | mmu-miR-124, mmu-miR-30e, mmu-miR-384-5p                           |
| GO:0051656 | establishment of organelle localization                    | Myo5a, Rab27a, Tmed10                                                                                                        | mmu-miR-124, mmu-miR-26a, mmu-miR-30e, mmu-miR-384-5p              |
| GO:0051898 | negative regulation of protein kinase B signaling cascade  | Epha2, Sfrp5                                                                                                                 | mmu-miR-124, mmu-miR-26a                                           |
| GO:0051905 | establishment of pigment granule localization              | Myo5a, Rab27a                                                                                                                | mmu-miR-124, mmu-miR-30e, mmu-miR-384-5p                           |
| GO:0051960 | regulation of nervous system development                   | Epha3, Eya1, Ttl, Ube2v2, Kalrn, Ache, Aspa, Bmp6, Ctdsp1, Dll4, Ednrb, Sfrp5, Slit1, Sox8, Sphk1, Ssh3, Ttc3, Xrcc6, Sema3a | mmu-miR-124, mmu-miR-26a, mmu-miR-30e, mmu-miR-379, mmu-miR-384-5p |
| GO:0055002 | striated muscle cell development                           | Edn1, Myh10, Rcan1, Ryr1, Snta1, Sox8                                                                                        | mmu-miR-124, mmu-miR-379                                           |

|            |                                                             |                                                                                                                                  |                                                                    |
|------------|-------------------------------------------------------------|----------------------------------------------------------------------------------------------------------------------------------|--------------------------------------------------------------------|
| GO:0055086 | nucleobase-containing small molecule metabolic process      | Ocln, Mat2a, Pemt                                                                                                                | mmu-miR-124, mmu-miR-26a, mmu-miR-30e, mmu-miR-384-5p              |
| GO:0060035 | notochord cell development                                  | Epha2                                                                                                                            | mmu-miR-124, mmu-miR-26a                                           |
| GO:0060047 | heart contraction                                           | Edn1, Apln, Atp1a1, Sema3a, Rps6ka2                                                                                              | mmu-miR-124, mmu-miR-26a, mmu-miR-30e, mmu-miR-379, mmu-miR-384-5p |
| GO:0060142 | regulation of syncytium formation by plasma membrane fusion | Adam9                                                                                                                            | mmu-miR-26a, mmu-miR-30e, mmu-miR-384-5p                           |
| GO:0060284 | regulation of cell development                              | Edn1, Epha3, Eya1, Ttl, Ube2v2, Kalrn, Ache, Aspa, Bmp6, Ctdsp1, Dll4, Ednrb, Slit1, Sox8, Sphk1, Ssh3, Ttc3, Xrcc6, Sema3a      | mmu-miR-124, mmu-miR-26a, mmu-miR-30e, mmu-miR-379, mmu-miR-384-5p |
| GO:0060326 | cell chemotaxis                                             | Edn1, Ednrb, Epha2, Nr4a1, Pip5k1a, Rhog                                                                                         | mmu-miR-124, mmu-miR-26a, mmu-miR-30e, mmu-miR-379, mmu-miR-384-5p |
| GO:0060537 | muscle tissue development                                   | Dmd, Eya1, Barx2, Cav1, Eya2, Lemd2, Myh10, Rcan1, Rxra, Ryr1, Snta1, Sox8, Srpk3, Usp2                                          | mmu-miR-124, mmu-miR-30e, mmu-miR-384-5p                           |
| GO:0060548 | negative regulation of cell death                           | Edn1, Eya1, Tcfap4, Pdcd10, Bcl6, Ube2v2, Akt1s1, Cav1, Dapk1, Dhcr24, Ednrb, Gas1, Gpam, Mtdh, Pim3, Sh3rf1, Snai2, Sox8, Sphk1 | mmu-miR-124, mmu-miR-26a, mmu-miR-30e, mmu-miR-379, mmu-miR-384-5p |
| GO:0060627 | regulation of vesicle-mediated transport                    | Cadps, Cav1, Clip3, Gas1, Kif3a, Myo5a, Rab27a, Rab3d, Rufy1                                                                     | mmu-miR-124, mmu-miR-30e, mmu-miR-384-5p                           |
| GO:0061035 | regulation of cartilage development                         | Rarg, Snai2, Smad1                                                                                                               | mmu-miR-124, mmu-miR-26a, mmu-miR-30e, mmu-miR-384-5p              |
| GO:0061138 | morphogenesis of a branching epithelium                     | Edn1, Rdh10, Eya1, Epha2, Gna13, Rxra, Sox8, Sema3a                                                                              | mmu-miR-124, mmu-miR-26a, mmu-miR-30e, mmu-miR-379, mmu-miR-384-5p |

|            |                                                              |                                                                                                                                                              |                                                                    |
|------------|--------------------------------------------------------------|--------------------------------------------------------------------------------------------------------------------------------------------------------------|--------------------------------------------------------------------|
| GO:0070201 | regulation of establishment of protein localization          | Clip3, Epha2, Rhog                                                                                                                                           | mmu-miR-124, mmu-miR-26a                                           |
| GO:0070384 | Harderian gland development                                  | Rarg                                                                                                                                                         | mmu-miR-124, mmu-miR-30e, mmu-miR-384-5p                           |
| GO:0070563 | negative regulation of vitamin D receptor signaling pathway  | Snai2                                                                                                                                                        | mmu-miR-124, mmu-miR-30e, mmu-miR-384-5p                           |
| GO:0070647 | protein modification by small protein conjugation or removal | Map3k1, Eny2, Rasd2, Rnf135, Sphk1, Trib3, Ttc3, Ube2i, Ube4a, Usp1, Usp2, Ube2e3, Brap, Ube2ql1                                                             | mmu-miR-124, mmu-miR-26a, mmu-miR-30e, mmu-miR-379, mmu-miR-384-5p |
| GO:0070727 | cellular macromolecule localization                          | Eya1, Bcl6, Rffl, Ap1m2, Casc3, Clip3, Epha2, Flot1, Lcp1, Pde2a, Pip5k1a, Pttg1ip, Rab27a, Rhog, Sfrp5, Snai2, Snx6, Sphk1, Tmed10                          | mmu-miR-124, mmu-miR-26a, mmu-miR-30e, mmu-miR-379, mmu-miR-384-5p |
| GO:0071322 | cellular response to carbohydrate stimulus                   | Pim3, Rps6ka2, Ppp3cb                                                                                                                                        | mmu-miR-124, mmu-miR-26a, mmu-miR-30e, mmu-miR-384-5p              |
| GO:0071702 | organic substance transport                                  | Ctns, Abca2, Slc22a5, Cadps, Cav1, Fzd4, Osbpl11, Osbpl7, Slc15a4, Slc1a4, Slc25a13, Slc27a1                                                                 | mmu-miR-124, mmu-miR-26a, mmu-miR-30e, mmu-miR-384-5p              |
| GO:0072358 | cardiovascular system development                            | Sall4, Slc22a5, Kif3a, Myh10, Ryr1, Snai2, Rps6ka2, Ppp3cb                                                                                                   | mmu-miR-124, mmu-miR-26a, mmu-miR-30e, mmu-miR-384-5p              |
| GO:0072523 | purine-containing compound catabolic process                 | Epha3, Gnal, Myo1e, Arhgap17, At13, Bcl6, Abca2, Atp1a1, Epha2, Gna13, Gnai1, Gnai2, Pcyox1, Pde2a, Pip5k1a, Rab27a, Rasd2, Rgs9, Rhog, Rras, Tbc1d9b, Xrcc6 | mmu-miR-124, mmu-miR-26a, mmu-miR-30e, mmu-miR-379, mmu-miR-384-5p |
| GO:0072659 | protein localization in plasma membrane                      | Clip3, Epha2, Flot1, Pip5k1a, Rhog                                                                                                                           | mmu-miR-124, mmu-miR-26a                                           |
| GO:0080135 | regulation of cellular response to stress                    | Edn1, Map3k1, Eya1, Ube2v2, Fzd4, Sfrp5, Sh3rf1, Snai2, Usp1                                                                                                 | mmu-miR-124, mmu-miR-26a, mmu-miR-30e, mmu-miR-379, mmu-miR-384-5p |

|            |                                                                                                 |                                                                                             |                                                                    |
|------------|-------------------------------------------------------------------------------------------------|---------------------------------------------------------------------------------------------|--------------------------------------------------------------------|
| GO:0090004 | positive regulation of establishment of protein localization in plasma membrane                 | Clip3, Epha2, Rhog                                                                          | mmu-miR-124, mmu-miR-26a                                           |
| GO:0090066 | regulation of anatomical structure size                                                         | Edn1, Map3k1, Ttl, Twf1, Akt1s1, Apln, Arpc1b, Cav1, Ednrb, Gsn, Plod3, Slit1, Ssh3, Sema3a | mmu-miR-124, mmu-miR-26a, mmu-miR-30e, mmu-miR-379, mmu-miR-384-5p |
| GO:0090090 | negative regulation of canonical Wnt receptor signaling pathway                                 | Aes, Cav1, Ror2, Sfrp5, Snai2                                                               | mmu-miR-124, mmu-miR-30e, mmu-miR-384-5p                           |
| GO:0090101 | negative regulation of transmembrane receptor protein serine/threonine kinase signaling pathway | Cav1, Snx6, Twsg1, Fst                                                                      | mmu-miR-124, mmu-miR-30e, mmu-miR-379, mmu-miR-384-5p              |
| GO:0090150 | establishment of protein localization in membrane                                               | Clip3, Epha2, Pip5k1a, Rhog                                                                 | mmu-miR-124, mmu-miR-26a                                           |
| GO:0090257 | regulation of muscle system process                                                             | Edn1, Atp1a1, Casq2, Cav1, Ryr1, Sphk1                                                      | mmu-miR-124, mmu-miR-379                                           |
| GO:0097011 | cellular response to granulocyte macrophage colony-stimulating factor stimulus                  | Pde2a                                                                                       | mmu-miR-124, mmu-miR-379                                           |
| GO:2000027 | regulation of organ morphogenesis                                                               | Edn1, Eya1, Ror2, Rxra, Sfrp5, Sox8                                                         | mmu-miR-124, mmu-miR-379                                           |
| GO:2000647 | negative regulation of stem cell proliferation                                                  | Snai2                                                                                       | mmu-miR-124, mmu-miR-30e, mmu-miR-384-5p                           |
|            |                                                                                                 |                                                                                             |                                                                    |
|            |                                                                                                 |                                                                                             |                                                                    |
|            |                                                                                                 |                                                                                             |                                                                    |

| <b>GO ID (molecular function)</b> | <b>Go Term (molecular function GO Term)</b>                        | <b>Gene Symbol (genes enriched by down-regulated miRNAs)</b>             | <b>Down-regulated miRNAs</b>                                       |
|-----------------------------------|--------------------------------------------------------------------|--------------------------------------------------------------------------|--------------------------------------------------------------------|
| GO:0000146                        | microfilament motor activity                                       | Myh10, Myo5a                                                             | mmu-miR-124, mmu-miR-30e, mmu-miR-384-5p                           |
| GO:0001664                        | G-protein coupled receptor binding                                 | Edn1, Gnal, Homer2, Apln, Clic6, Ednrb, Gna13, Gnai1, Gnai2, Ror2        | mmu-miR-124, mmu-miR-26a, mmu-miR-30e, mmu-miR-379, mmu-miR-384-5p |
| GO:0001948                        | glycoprotein binding                                               | Dmd, Fbxo27, Slit1, Fst                                                  | mmu-miR-124, mmu-miR-30e, mmu-miR-379, mmu-miR-384-5p              |
| GO:0002151                        | G-quadruplex RNA binding                                           | Fxr1                                                                     | mmu-miR-124, mmu-miR-30e, mmu-miR-384-5p                           |
| GO:0003708                        | retinoic acid receptor activity                                    | Rarg, Rxra                                                               | mmu-miR-124, mmu-miR-30e, mmu-miR-384-5p                           |
| GO:0003779                        | actin binding                                                      | Dmd, Homer2, Twf1, Arpc1b, Gsn, Inf2, Myo5a, Snta1, Ssh3, Pawr, Epb4.1l3 | mmu-miR-124, mmu-miR-26a, mmu-miR-30e, mmu-miR-379, mmu-miR-384-5p |
| GO:0003924                        | GTPase activity                                                    | Gnal, At13, Gna13, Gnai1, Gnai2, Rab27a, Rasd2, Rhog, Rras               | mmu-miR-124, mmu-miR-26a, mmu-miR-30e, mmu-miR-384-5p              |
| GO:0003950                        | NAD+ ADP-ribosyltransferase activity                               | Parp16, Parp9                                                            | mmu-miR-124, mmu-miR-30e, mmu-miR-384-5p                           |
| GO:0004021                        | L-alanine:2-oxoglutarate aminotransferase activity                 | Gpt2                                                                     | mmu-miR-124, mmu-miR-30e, mmu-miR-384-5p                           |
| GO:0004221                        | ubiquitin thiolesterase activity                                   | Usp1, Usp2, Usp30, Usp48                                                 | mmu-miR-124, mmu-miR-26a, mmu-miR-30e, mmu-miR-384-5p              |
| GO:0004360                        | glutamine-fructose-6-phosphate transaminase (isomerizing) activity | Gfpt2                                                                    | mmu-miR-124, mmu-miR-30e, mmu-miR-384-5p                           |

|            |                                                  |                                                                        |                                                                    |
|------------|--------------------------------------------------|------------------------------------------------------------------------|--------------------------------------------------------------------|
| GO:0004478 | methionine adenosyltransferase activity          | Mat2a                                                                  | mmu-miR-124, mmu-miR-26a, mmu-miR-30e, mmu-miR-384-5p              |
| GO:0004569 | glycoprotein endo-alpha-1,2-mannosidase activity | Edem3                                                                  | mmu-miR-30e, mmu-miR-379, mmu-miR-384-5p                           |
| GO:0004656 | procollagen-proline 4-dioxygenase activity       | P4ha2, P4ha1                                                           | mmu-miR-124, mmu-miR-30e, mmu-miR-384-5p                           |
| GO:0004706 | JUN kinase kinase kinase activity                | Map3k1                                                                 | mmu-miR-124, mmu-miR-30e, mmu-miR-379, mmu-miR-384-5p              |
| GO:0004710 | MAPK/ERK kinase kinase activity                  | Map3k1                                                                 | mmu-miR-124, mmu-miR-30e, mmu-miR-379, mmu-miR-384-5p              |
| GO:0004711 | ribosomal protein S6 kinase activity             | Rps6ka2                                                                | mmu-miR-26a, mmu-miR-30e, mmu-miR-384-5p                           |
| GO:0004721 | phosphoprotein phosphatase activity              | Acp2, Eya1, Eya2, Ptpnz1, Ssh3, Ptpn13                                 | mmu-miR-124, mmu-miR-26a, mmu-miR-30e, mmu-miR-384-5p              |
| GO:0004722 | protein serine/threonine phosphatase activity    | Ppm1f, Ctdsp1, Ppp3cb                                                  | mmu-miR-124, mmu-miR-26a, mmu-miR-30e, mmu-miR-384-5p              |
| GO:0004842 | ubiquitin-protein ligase activity                | Map3k1, Rnf135, Ttc3, Ube2i, Ube4a, Ube2e3, Brap, Ube2ql1              | mmu-miR-124, mmu-miR-26a, mmu-miR-30e, mmu-miR-379, mmu-miR-384-5p |
| GO:0005003 | ephrin receptor activity                         | Epha3, Epha2                                                           | mmu-miR-124, mmu-miR-26a                                           |
| GO:0005088 | Ras guanyl-nucleotide exchange factor activity   | Kalrn, Arhgef4, Ranbp10, Sos2, Spata13                                 | mmu-miR-124, mmu-miR-26a, mmu-miR-30e, mmu-miR-384-5p              |
| GO:0005244 | voltage-gated ion channel activity               | Cacnb2, Cacng5, Clic6, Kcnk2, Kctd5, Kctd8, Ryr1, Scn7a, Tpcn2         | mmu-miR-124, mmu-miR-30e, mmu-miR-384-5p                           |
| GO:0005261 | cation channel activity                          | Cacnb2, Cacng5, Itpr3, Kcnk10, Kcnk2, Kctd5, Kctd8, Ryr1, Scn7a, Tpcn2 | mmu-miR-124, mmu-miR-30e, mmu-miR-384-5p                           |

|            |                                                                        |                                                                                                                                                             |                                                                    |
|------------|------------------------------------------------------------------------|-------------------------------------------------------------------------------------------------------------------------------------------------------------|--------------------------------------------------------------------|
| GO:0005506 | iron ion binding                                                       | P4ha2, Scd2, Fa2h, Tet1, P4ha1, 1110031I02Rik, Cyb5, Cycs, Plod3, Scd1, Steap3                                                                              | mmu-miR-124, mmu-miR-26a, mmu-miR-30e, mmu-miR-384-5p              |
| GO:0005516 | calmodulin binding                                                     | Myo1e, Dapk1, Myh10, Myo5a, Snta1, Sphk1, Ppp3cb                                                                                                            | mmu-miR-124, mmu-miR-26a, mmu-miR-30e, mmu-miR-384-5p              |
| GO:0005518 | collagen binding                                                       | Adam9, Ache, Nid1                                                                                                                                           | mmu-miR-124, mmu-miR-26a, mmu-miR-30e, mmu-miR-384-5p              |
| GO:0005525 | GTP binding                                                            | Gnal, At13, Gna13, Gnai1, Gnai2, Rab27a, Rab3d, Rasd2, Rhog, Rras, Sept10, Sept9, Suclg2                                                                    | mmu-miR-124, mmu-miR-26a, mmu-miR-30e, mmu-miR-384-5p              |
| GO:0005543 | phospholipid binding                                                   | Myo1e, Twf1, Kalrn, Anxa4, Anxa5, Arhgef4, Cadps, Itpr3, Pemt, Plekhf1, Snta1, Snx6, Sos2, Spata13                                                          | mmu-miR-124, mmu-miR-26a, mmu-miR-30e, mmu-miR-384-5p              |
| GO:0008119 | thiopurine S-methyltransferase activity                                | Ocln                                                                                                                                                        | mmu-miR-26a, mmu-miR-30e, mmu-miR-384-5p                           |
| GO:0008168 | methyltransferase activity                                             | Suv39h2, Ocln, Aldh1l2, Ftsjd1, Mtr, Nsun2, Pemt                                                                                                            | mmu-miR-124, mmu-miR-26a, mmu-miR-30e, mmu-miR-384-5p              |
| GO:0008489 | UDP-galactose:glucosylceramide beta-1,4-galactosyltransferase activity | B4galt6                                                                                                                                                     | mmu-miR-124, mmu-miR-30e, mmu-miR-384-5p                           |
| GO:0015075 | ion transmembrane transporter activity                                 | Cacnb2, 2310046O06Rik, Gria2, Slc22a5, Atp1a1, Cacng5, Clic6, Itpr3, Kcnk10, Kcnk2, Kctd5, Kctd8, Pcyox1, Ryr1, Scn7a, Slc1a4, Slc9a2, Slc9a9, Tmco3, Tpcn2 | mmu-miR-124, mmu-miR-26a, mmu-miR-30e, mmu-miR-379, mmu-miR-384-5p |
| GO:0015077 | monovalent inorganic cation transmembrane transporter activity         | 2310046O06Rik, Atp1a1, Kcnk10, Kcnk2, Kctd5, Kctd8, Slc1a4, Slc9a2, Slc9a9, Tmco3                                                                           | mmu-miR-124, mmu-miR-26a, mmu-miR-30e, mmu-miR-384-5p              |



|            |                                                                                                                                                                                                   |                                                                                                                                             |                                                       |
|------------|---------------------------------------------------------------------------------------------------------------------------------------------------------------------------------------------------|---------------------------------------------------------------------------------------------------------------------------------------------|-------------------------------------------------------|
| GO:0015291 | secondary active transmembrane transporter activity                                                                                                                                               | Slc22a5, Slc15a4, Slc17a5, Slc1a4, Slc9a2, Slc9a9, Tmco3                                                                                    | mmu-miR-124, mmu-miR-26a                              |
| GO:0015299 | solute:hydrogen antiporter activity                                                                                                                                                               | Slc9a2, Slc9a9, Tmco3                                                                                                                       | mmu-miR-124, mmu-miR-26a                              |
| GO:0015300 | solute:solute antiporter activity                                                                                                                                                                 | Slc9a2, Slc9a9, Tmco3                                                                                                                       | mmu-miR-124, mmu-miR-26a                              |
| GO:0015385 | sodium:hydrogen antiporter activity                                                                                                                                                               | Slc9a2, Slc9a9                                                                                                                              | mmu-miR-124, mmu-miR-26a                              |
| GO:0015491 | cation:cation antiporter activity                                                                                                                                                                 | Slc9a2, Slc9a9                                                                                                                              | mmu-miR-124, mmu-miR-26a                              |
| GO:0016307 | phosphatidylinositol phosphate kinase activity                                                                                                                                                    | Pip4k2a, Pip5k1a                                                                                                                            | mmu-miR-124, mmu-miR-30e, mmu-miR-384-5p              |
| GO:0016462 | pyrophosphatase activity                                                                                                                                                                          | Gnal, Kif21b, Myo1e, At13, Abca2, Atp1a1, Gna13, Gnai1, Gnai2, Kif2a, Kif3a, Myh10, Myo5a, Pcyox1, Rab27a, Rasd2, Rhog, Rras, Xrcc6, Yme111 | mmu-miR-124, mmu-miR-26a, mmu-miR-30e, mmu-miR-384-5p |
| GO:0016702 | oxidoreductase activity, acting on single donors with incorporation of molecular oxygen, incorporation of two atoms of oxygen                                                                     | P4ha2, Tet1, P4ha1, 1110031I02Rik, Plod3                                                                                                    | mmu-miR-124, mmu-miR-26a, mmu-miR-30e, mmu-miR-384-5p |
| GO:0016706 | oxidoreductase activity, acting on paired donors, with incorporation or reduction of molecular oxygen, 2-oxoglutarate as one donor, and incorporation of one atom each of oxygen into both donors | Tet1, 1110031I02Rik, Plod3                                                                                                                  | mmu-miR-124, mmu-miR-26a, mmu-miR-30e, mmu-miR-384-5p |

|            |                                                                             |                                                                                                                                             |                                                                    |
|------------|-----------------------------------------------------------------------------|---------------------------------------------------------------------------------------------------------------------------------------------|--------------------------------------------------------------------|
| GO:0016747 | transferase activity, transferring acyl groups other than amino-acyl groups | Lass2, Dgat2, Agpat5, Cpt1a, Elovl5, Gpam, Hadha, Lpcat2, Lpcat3                                                                            | mmu-miR-124, mmu-miR-30e, mmu-miR-384-5p                           |
| GO:0016757 | transferase activity, transferring glycosyl groups                          | Agl, B4galt6, C1galt1, Galnt10, Galnt12, Galnt9, Glt8d1, Parp16, Parp9, Plod3, Stt3a                                                        | mmu-miR-124, mmu-miR-30e, mmu-miR-384-5p                           |
| GO:0016817 | hydrolase activity, acting on acid anhydrides                               | Gnal, Kif21b, Myo1e, At13, Abca2, Atp1a1, Gna13, Gnai1, Gnai2, Kif2a, Kif3a, Myh10, Myo5a, Pcyox1, Rab27a, Rasd2, Rhog, Rras, Xrcc6, Yme1l1 | mmu-miR-124, mmu-miR-26a, mmu-miR-30e, mmu-miR-384-5p              |
| GO:0016874 | ligase activity                                                             | Map3k1, Ttl, Rffl, Acss1, Farsa, Fpgs, Hars2, Rnf135, Sh3rf1, Slc27a1, Suclg2, Ttc3, Ube2i, Ube4a, Ube2e3, Brap, Mkrn3, Ube2ql1             | mmu-miR-124, mmu-miR-26a, mmu-miR-30e, mmu-miR-379, mmu-miR-384-5p |
| GO:0016881 | acid-amino acid ligase activity                                             | Map3k1, Ttl, Rnf135, Ttc3, Ube2i, Ube4a, Ube2e3, Brap, Ube2ql1                                                                              | mmu-miR-124, mmu-miR-26a, mmu-miR-30e, mmu-miR-379, mmu-miR-384-5p |
| GO:0019001 | guanyl nucleotide binding                                                   | Gnal, At13, Gna13, Gnai1, Gnai2, Pde2a, Rab27a, Rab3d, Rasd2, Rhog, Rras, Sept10, Sept9, Suclg2                                             | mmu-miR-124, mmu-miR-26a, mmu-miR-30e, mmu-miR-379, mmu-miR-384-5p |
| GO:0019905 | syntaxin binding                                                            | Cav1, Myo5a, Snap29                                                                                                                         | mmu-miR-124, mmu-miR-30e, mmu-miR-384-5p                           |
| GO:0022803 | passive transmembrane transporter activity                                  | Cacnb2, Gria2, Cacng5, Clic6, Itpr3, Kcnk10, Kcnk2, Kctd5, Kctd8, Ryr1, Scn7a, Slc1a4, Tpcn2                                                | mmu-miR-124, mmu-miR-30e, mmu-miR-379, mmu-miR-384-5p              |
| GO:0022836 | gated channel activity                                                      | Cacnb2, Gria2, Cacng5, Clic6, Itpr3, Kcnk2, Kctd5, Kctd8, Ryr1, Scn7a, Tpcn2                                                                | mmu-miR-124, mmu-miR-30e, mmu-miR-379, mmu-miR-384-5p              |
| GO:0022838 | substrate-specific channel activity                                         | Cacnb2, Gria2, Cacng5, Clic6, Itpr3, Kcnk10, Kcnk2, Kctd5, Kctd8, Ryr1, Scn7a, Slc1a4, Tpcn2                                                | mmu-miR-124, mmu-miR-30e, mmu-miR-379, mmu-miR-384-5p              |
| GO:0022891 | substrate-specific transmembrane transporter activity                       | Slc2a12, Sec61a2, Slc29a1, Slc2a13                                                                                                          | mmu-miR-124, mmu-miR-26a, mmu-miR-30e, mmu-miR-384-5p              |
| GO:0030165 | PDZ domain binding                                                          | Dmd, Gria2, Slc22a5, Fzd4, Sfrp5, Snta1                                                                                                     | mmu-miR-124, mmu-miR-30e, mmu-miR-379, mmu-miR-384-5p              |

|            |                                                   |                                                                                                                                                                              |                                                                    |
|------------|---------------------------------------------------|------------------------------------------------------------------------------------------------------------------------------------------------------------------------------|--------------------------------------------------------------------|
| GO:0030275 | LRR domain binding                                | Lrrfip2, Pawr                                                                                                                                                                | mmu-miR-124, mmu-miR-26a, mmu-miR-30e, mmu-miR-384-5p              |
| GO:0031418 | L-ascorbic acid binding                           | P4ha2, P4ha1, 1110031I02Rik, Plod3                                                                                                                                           | mmu-miR-124, mmu-miR-30e, mmu-miR-384-5p                           |
| GO:0031543 | peptidyl-proline dioxygenase activity             | P4ha2, P4ha1                                                                                                                                                                 | mmu-miR-124, mmu-miR-30e, mmu-miR-384-5p                           |
| GO:0031683 | G-protein beta/gamma-subunit complex binding      | Gnal, Gna13, Gnai1, Gnai2                                                                                                                                                    | mmu-miR-124, mmu-miR-26a, mmu-miR-30e, mmu-miR-384-5p              |
| GO:0031702 | type 1 angiotensin receptor binding               | Ednrb, Gna13                                                                                                                                                                 | mmu-miR-124, mmu-miR-26a, mmu-miR-30e, mmu-miR-384-5p              |
| GO:0031752 | D5 dopamine receptor binding                      | Gna13                                                                                                                                                                        | mmu-miR-124, mmu-miR-26a                                           |
| GO:0033192 | calmodulin-dependent protein phosphatase activity | Ppm1f, Ppp3cb                                                                                                                                                                | mmu-miR-124, mmu-miR-26a, mmu-miR-30e, mmu-miR-384-5p              |
| GO:0036004 | GAF domain binding                                | Pde2a                                                                                                                                                                        | mmu-miR-124, mmu-miR-379                                           |
| GO:0036094 | small molecule binding                            | P4ha2, P4ha1, 1110031I02Rik, Ache, Aldh1l2, Gpt2, Itpr3, Lmbrd1, Mtr, Plod3                                                                                                  | mmu-miR-124, mmu-miR-30e, mmu-miR-384-5p                           |
| GO:0042578 | phosphoric ester hydrolase activity               | Ppm1f, Acp2, Eya1, Atp1a1, Ctdsp1, Eya2, Pde2a, Ptpnz1, Ssh3, Ptpn13, Ppp3cb                                                                                                 | mmu-miR-124, mmu-miR-26a, mmu-miR-30e, mmu-miR-379, mmu-miR-384-5p |
| GO:0042802 | identical protein binding                         | Homer2, Tcfap4, Pdc10, At13, Trim39, Dgat2, Fgfr1op, 2610018G03Rik, Ache, Aldh9a1, Casc3, Clic6, Cpt1a, Fzd4, Lcp1, Nr4a1, Pde2a, Slc27a1, Snx6, Tpcn2, Tpd52l2, Usp2, Smad1 | mmu-miR-124, mmu-miR-26a, mmu-miR-30e, mmu-miR-379, mmu-miR-384-5p |
| GO:0043236 | laminin binding                                   | Adam9, Ache, Itga7, Nid1                                                                                                                                                     | mmu-miR-124, mmu-miR-26a, mmu-miR-30e, mmu-miR-384-5p              |
| GO:0043395 | heparan sulfate proteoglycan binding              | Slit1, Fst                                                                                                                                                                   | mmu-miR-124, mmu-miR-30e, mmu-miR-379, mmu-miR-384-5p              |

|            |                               |               |                                                       |
|------------|-------------------------------|---------------|-------------------------------------------------------|
| GO:0046625 | sphingolipid binding          | Map3k1, Clip3 | mmu-miR-124, mmu-miR-30e, mmu-miR-379, mmu-miR-384-5p |
| GO:0050998 | nitric-oxide synthase binding | Dmd, Cav1     | mmu-miR-124, mmu-miR-30e, mmu-miR-384-5p              |

**Supplementary Table 4.** Statistical analysis of electrophysiology data in Fig. 2a.

| Time after LTP induction (min) | Comparison of 3 groups (EGFP, miR-26a, miR-384-5p) |                            |                         |                               | miR-26a vs. EGFP      |                            |                  |                               | miR-384-5p vs. EGFP   |                            |                  |                               |
|--------------------------------|----------------------------------------------------|----------------------------|-------------------------|-------------------------------|-----------------------|----------------------------|------------------|-------------------------------|-----------------------|----------------------------|------------------|-------------------------------|
|                                | Normality test passed                              | Equal variance test passed | P-value (One-way ANOVA) | P-value (Kruskal-Wallis test) | Normality test passed | Equal variance test passed | P-value (t-test) | P-value (Mann-Whitney U Test) | Normality test passed | Equal variance test passed | P-value (t-test) | P-value (Mann-Whitney U Test) |
| 3                              | N                                                  |                            |                         | 0.074                         |                       |                            |                  |                               |                       |                            |                  |                               |
| 6                              | N                                                  |                            |                         | 0.126                         |                       |                            |                  |                               |                       |                            |                  |                               |
| 9                              | N                                                  |                            |                         | 0.114                         |                       |                            |                  |                               |                       |                            |                  |                               |
| 12                             | N                                                  |                            |                         | 0.323                         |                       |                            |                  |                               |                       |                            |                  |                               |
| 15                             | N                                                  |                            |                         | 0.111                         |                       |                            |                  |                               |                       |                            |                  |                               |
| 18                             | N                                                  |                            |                         | 0.076                         |                       |                            |                  |                               |                       |                            |                  |                               |
| 21                             | N                                                  |                            |                         | 0.184                         |                       |                            |                  |                               |                       |                            |                  |                               |
| 24                             | N                                                  |                            |                         | 0.165                         |                       |                            |                  |                               |                       |                            |                  |                               |
| 27                             | N                                                  |                            |                         | 0.342                         |                       |                            |                  |                               |                       |                            |                  |                               |
| 30                             | N                                                  |                            |                         | 0.237                         |                       |                            |                  |                               |                       |                            |                  |                               |
| 33                             | N                                                  |                            |                         | 0.113                         |                       |                            |                  |                               |                       |                            |                  |                               |
| 36                             | N                                                  |                            |                         | 0.05                          |                       |                            |                  |                               |                       |                            |                  |                               |
| 39                             | N                                                  |                            |                         | 0.086                         |                       |                            |                  |                               |                       |                            |                  |                               |
| 42                             | N                                                  |                            |                         | 0.041                         | N                     |                            |                  | 0.022                         | Y                     | N                          |                  | 0.058                         |
| 45                             | N                                                  |                            |                         | 0.013                         | Y                     | N                          |                  | 0.026                         | Y                     | N                          |                  | 0.006                         |
| 48                             | N                                                  |                            |                         | 0.024                         | N                     |                            |                  | 0.076                         | N                     |                            |                  | 0.01                          |
| 51                             | N                                                  |                            |                         | 0.022                         | Y                     | N                          |                  | 0.018                         | Y                     | N                          |                  | 0.023                         |
| 54                             | N                                                  |                            |                         | 0.024                         | Y                     | N                          |                  | 0.018                         | Y                     | N                          |                  | 0.028                         |
| 57                             | N                                                  |                            |                         | 0.037                         | Y                     | Y                          | 0.021            |                               | Y                     | N                          |                  | 0.033                         |

|     |   |   |       |        |   |   |        |        |   |   |       |        |
|-----|---|---|-------|--------|---|---|--------|--------|---|---|-------|--------|
| 60  | N |   |       | 0.02   | Y | N |        | 0.057  | Y | N |       | 0.008  |
| 63  | N |   |       | 0.022  | N |   |        | 0.03   | Y | N |       | 0.015  |
| 66  | N |   |       | 0.01   | Y | N |        | 0.009  | Y | N |       | 0.015  |
| 69  | Y | Y | 0.003 |        | Y | Y | 0.008  |        | Y | Y | 0.01  |        |
| 72  | Y | N |       | 0.003  | Y | N |        | 0.003  | Y | N |       | 0.005  |
| 75  | Y | N |       | 0.006  | Y | N |        | 0.004  | Y | N |       | 0.01   |
| 78  | Y | N |       | 0.003  | Y | N |        | 0.004  | Y | N |       | 0.005  |
| 81  | N |   |       | 0.007  | Y | N |        | 0.007  | Y | N |       | 0.02   |
| 84  | N |   |       | 0.023  | Y | Y | 0.012  |        | N |   |       | 0.055  |
| 87  | N |   |       | 0.006  | Y | N |        | 0.004  | Y | N |       | 0.013  |
| 90  | Y | N |       | 0.002  | Y | N |        | 0.001  | Y | Y | 0.006 |        |
| 93  | N |   |       | <0.001 | N |   |        | <0.001 | Y | Y | 0.004 |        |
| 96  | N |   |       | 0.001  | Y | Y | <0.001 |        | Y | Y | 0.009 |        |
| 99  | N |   |       | 0.002  | N |   |        | 0.001  | Y | Y | 0.016 |        |
| 102 | N |   |       | 0.001  | N |   |        | <0.001 | Y | Y | 0.005 |        |
| 105 | N |   |       | <0.001 | N |   |        | <0.001 | N |   |       | 0.002  |
| 108 | N |   |       | <0.001 | N |   |        | <0.001 | N |   |       | 0.002  |
| 111 | N |   |       | <0.001 | N |   |        | <0.001 | Y | Y | 0.02  |        |
| 114 | N |   |       | 0.001  | N |   |        | 0.001  | Y | Y | 0.014 |        |
| 117 | N |   |       | <0.001 | N |   |        | <0.001 | N |   |       | <0.001 |
| 120 | N |   |       | <0.001 | N |   |        | <0.001 | Y | N |       | 0.005  |

**Supplementary Table 5.** Statistic analysis of electrophysiology data in Fig. 2b.

| Time after LTP induction (min) | Comparison of 3 groups (EGFP, miR-26a, miR-384-5p) |                            |                         |                               |
|--------------------------------|----------------------------------------------------|----------------------------|-------------------------|-------------------------------|
|                                | Normality test passed                              | Equal variance test passed | P-value (One-way ANOVA) | P-value (Kruskal-Wallis test) |
| 3                              | Y                                                  | Y                          | 0.925                   |                               |
| 6                              | Y                                                  | Y                          | 0.937                   |                               |
| 9                              | Y                                                  | Y                          | 0.982                   |                               |
| 12                             | Y                                                  | N                          |                         | 0.763                         |
| 15                             | Y                                                  | Y                          | 0.891                   |                               |
| 18                             | N                                                  |                            |                         | 0.811                         |
| 21                             | Y                                                  | Y                          | 0.554                   |                               |
| 24                             | Y                                                  | Y                          | 0.214                   |                               |
| 27                             | Y                                                  | Y                          | 0.2                     |                               |
| 30                             | N                                                  |                            |                         | 0.145                         |
| 33                             | N                                                  |                            |                         | 0.454                         |
| 36                             | Y                                                  | Y                          | 0.437                   |                               |
| 39                             | Y                                                  | Y                          | 0.359                   |                               |
| 42                             | Y                                                  | Y                          | 0.201                   |                               |
| 45                             | Y                                                  | Y                          | 0.29                    |                               |
| 48                             | Y                                                  | Y                          | 0.267                   |                               |
| 51                             | Y                                                  | Y                          | 0.343                   |                               |
| 54                             | Y                                                  | Y                          | 0.286                   |                               |
| 57                             | Y                                                  | Y                          | 0.079                   |                               |
| 60                             | Y                                                  | Y                          | 0.239                   |                               |
| 63                             | Y                                                  | Y                          | 0.124                   |                               |
| 66                             | Y                                                  | Y                          | 0.229                   |                               |
| 69                             | Y                                                  | Y                          | 0.079                   |                               |
| 72                             | Y                                                  | Y                          | 0.151                   |                               |
| 75                             | Y                                                  | Y                          | 0.264                   |                               |
| 78                             | Y                                                  | Y                          | 0.055                   |                               |
| 81                             | Y                                                  | Y                          | 0.463                   |                               |
| 84                             | Y                                                  | Y                          | 0.242                   |                               |
| 87                             | Y                                                  | Y                          | 0.604                   |                               |

|     |   |   |       |  |
|-----|---|---|-------|--|
| 90  | Y | Y | 0.173 |  |
| 93  | Y | Y | 0.055 |  |
| 96  | Y | Y | 0.227 |  |
| 99  | Y | Y | 0.318 |  |
| 102 | Y | Y | 0.507 |  |
| 105 | Y | Y | 0.202 |  |
| 108 | Y | Y | 0.555 |  |
| 111 | Y | Y | 0.835 |  |
| 114 | Y | Y | 0.221 |  |
| 117 | Y | Y | 0.389 |  |
| 120 | Y | Y | 0.474 |  |



**Supplementary Table 6.** Statistical analysis of electrophysiology data in Fig. 2c.

| Comparison of 6 groups (control, miR-26a-AS-Scr, miR-384-5p-AS-Scr, miR-26a-AS, miR-384-5p-AS, miR-191-AS) |                       |                            |                         |                               |
|------------------------------------------------------------------------------------------------------------|-----------------------|----------------------------|-------------------------|-------------------------------|
| Time (min)                                                                                                 | Normality test passed | Equal variance test passed | P-value (One-way ANOVA) | P-value (Kruskal-Wallis test) |
| 1                                                                                                          | Y                     | Y                          | 0.788                   |                               |
| 2                                                                                                          | N                     |                            |                         | 0.114                         |
| 3                                                                                                          | Y                     | Y                          | 0.982                   |                               |
| 4                                                                                                          | Y                     | Y                          | 0.257                   |                               |
| 5                                                                                                          | Y                     | Y                          | 0.594                   |                               |
| 6                                                                                                          | Y                     | Y                          | 0.02                    |                               |
| 7                                                                                                          | Y                     | Y                          | <0.001                  |                               |
| 8                                                                                                          | Y                     | N                          |                         | 0.003                         |
| 9                                                                                                          | N                     |                            |                         | <0.001                        |
| 10                                                                                                         | Y                     | N                          |                         | <0.001                        |
| 11                                                                                                         | N                     |                            |                         | <0.001                        |
| 12                                                                                                         | Y                     | N                          |                         | 0.004                         |
| 13                                                                                                         | Y                     | N                          |                         | 0.007                         |
| 14                                                                                                         | Y                     | N                          |                         | 0.003                         |
| 15                                                                                                         | N                     |                            |                         | 0.006                         |
| 16                                                                                                         | Y                     | N                          |                         | <0.001                        |
| 17                                                                                                         | N                     |                            |                         | <0.001                        |
| 18                                                                                                         | Y                     | N                          |                         | <0.001                        |
| 19                                                                                                         | N                     |                            |                         | <0.001                        |
| 20                                                                                                         | N                     |                            |                         | <0.001                        |
| 21                                                                                                         | N                     |                            |                         | <0.001                        |
| 22                                                                                                         | N                     |                            |                         | <0.001                        |
| 23                                                                                                         | N                     |                            |                         | <0.001                        |
| 24                                                                                                         | N                     |                            |                         | <0.001                        |
| 25                                                                                                         | N                     |                            |                         | <0.001                        |
| 26                                                                                                         | N                     |                            |                         | <0.001                        |
| 27                                                                                                         | N                     |                            |                         | <0.001                        |
| 28                                                                                                         | N                     |                            |                         | <0.001                        |
| 29                                                                                                         | N                     |                            |                         | <0.001                        |
| 30                                                                                                         | N                     |                            |                         | <0.001                        |
| 31                                                                                                         | N                     |                            |                         | <0.001                        |
| 32                                                                                                         | N                     |                            |                         | <0.001                        |
| 33                                                                                                         | N                     |                            |                         | <0.001                        |
| 34                                                                                                         | Y                     | N                          |                         | 0.001                         |
| 35                                                                                                         | N                     |                            |                         | <0.001                        |
| 36                                                                                                         | N                     |                            |                         | <0.001                        |
| 37                                                                                                         | N                     |                            |                         | <0.001                        |
| 38                                                                                                         | N                     |                            |                         | <0.001                        |
| 39                                                                                                         | N                     |                            |                         | <0.001                        |
| 40                                                                                                         | N                     |                            |                         | <0.001                        |
| 41                                                                                                         | N                     |                            |                         | <0.001                        |

|    |   |   |        |        |
|----|---|---|--------|--------|
| 42 | Y | N |        | <0.001 |
| 43 | N |   |        | <0.001 |
| 44 | Y | Y | <0.001 |        |
| 45 | N |   |        | <0.001 |
| 46 | N |   |        | <0.001 |
| 47 | N |   |        | <0.001 |
| 48 | Y | Y | <0.001 |        |
| 49 | Y | Y | <0.001 |        |
| 50 | N |   |        | <0.001 |
| 51 | Y | Y | <0.001 |        |
| 52 | Y | Y | <0.001 |        |
| 53 | N |   |        | 0.001  |
| 54 | Y | Y | <0.001 |        |
| 55 | Y | Y | <0.001 |        |
| 56 | Y | Y | <0.001 |        |
| 57 | Y | Y | <0.001 |        |
| 58 | Y | Y | <0.001 |        |
| 59 | Y | Y | <0.001 |        |
| 60 | Y | Y | <0.001 |        |

|            | miR-26a-AS-Scr vs. control |                            |                  |                               |
|------------|----------------------------|----------------------------|------------------|-------------------------------|
| Time (min) | Normality test passed      | Equal variance test passed | P-value (t-test) | P-value (Mann-Whitney U Test) |
| 1          |                            |                            |                  |                               |
| 2          |                            |                            |                  |                               |
| 3          |                            |                            |                  |                               |
| 4          |                            |                            |                  |                               |
| 5          |                            |                            |                  |                               |
| 6          | Y                          | Y                          | 0.102            |                               |
| 7          | Y                          | Y                          | 0.569            |                               |
| 8          | Y                          | Y                          | 0.447            |                               |
| 9          | Y                          | Y                          | 0.065            |                               |
| 10         | Y                          | Y                          | 0.808            |                               |
| 11         | N                          |                            |                  | 0.336                         |
| 12         | Y                          | Y                          | 0.793            |                               |
| 13         | Y                          | Y                          | 0.916            |                               |
| 14         | Y                          | Y                          | 0.664            |                               |
| 15         | Y                          | Y                          | 0.969            |                               |
| 16         | Y                          | Y                          | 0.853            |                               |
| 17         | Y                          | Y                          | 0.746            |                               |
| 18         | Y                          | Y                          | 0.802            |                               |
| 19         | Y                          | Y                          | 0.668            |                               |
| 20         | Y                          | Y                          | 0.189            |                               |
| 21         | N                          |                            |                  | 0.867                         |
| 22         | N                          |                            |                  | 0.779                         |
| 23         | Y                          | Y                          | 0.319            |                               |
| 24         | Y                          | Y                          | 0.365            |                               |
| 25         | Y                          | Y                          | 0.626            |                               |
| 26         | Y                          | Y                          | 0.972            |                               |
| 27         | Y                          | Y                          | 0.748            |                               |
| 28         | Y                          | Y                          | 0.899            |                               |
| 29         | Y                          | Y                          | 0.779            |                               |
| 30         | Y                          | Y                          | 0.179            |                               |
| 31         | Y                          | Y                          | 0.17             |                               |
| 32         | Y                          | Y                          | 0.796            |                               |
| 33         | Y                          | Y                          | 0.648            |                               |
| 34         | Y                          | Y                          | 0.286            |                               |
| 35         | Y                          | Y                          | 0.505            |                               |
| 36         | Y                          | Y                          | 0.526            |                               |
| 37         | Y                          | Y                          | 0.494            |                               |
| 38         | Y                          | Y                          | 0.966            |                               |
| 39         | Y                          | Y                          | 0.566            |                               |
| 40         | Y                          | Y                          | 0.606            |                               |
| 41         | Y                          | Y                          | 0.203            |                               |

|    |   |   |       |       |
|----|---|---|-------|-------|
| 42 | N |   |       | 0.463 |
| 43 | Y | Y | 0.196 |       |
| 44 | N |   |       | 0.613 |
| 45 | N |   |       | 0.613 |
| 46 | Y | Y | 0.591 |       |
| 47 | N |   |       | 0.694 |
| 48 | Y | Y | 0.966 |       |
| 49 | Y | Y | 0.776 |       |
| 50 | Y | Y | 0.437 |       |
| 51 | Y | Y | 0.872 |       |
| 52 | Y | Y | 0.724 |       |
| 53 | Y | Y | 0.345 |       |
| 54 | Y | Y | 0.186 |       |
| 55 | Y | Y | 0.984 |       |
| 56 | Y | Y | 0.773 |       |
| 57 | Y | Y | 0.844 |       |
| 58 | Y | Y | 0.714 |       |
| 59 | Y | Y | 0.987 |       |
| 60 | Y | Y | 0.969 |       |

| miR-384-5p-AS-Scr vs. control |                       |                            |                  |                               |
|-------------------------------|-----------------------|----------------------------|------------------|-------------------------------|
| Time (min)                    | Normality test passed | Equal variance test passed | P-value (t-test) | P-value (Mann-Whitney U Test) |
| 1                             |                       |                            |                  |                               |
| 2                             |                       |                            |                  |                               |
| 3                             |                       |                            |                  |                               |
| 4                             |                       |                            |                  |                               |
| 5                             |                       |                            |                  |                               |
| 6                             | Y                     | Y                          | 0.9              |                               |
| 7                             | Y                     | Y                          | 0.736            |                               |
| 8                             | Y                     | Y                          | 0.902            |                               |
| 9                             | Y                     | Y                          | 0.006            |                               |
| 10                            | Y                     | Y                          | 0.763            |                               |
| 11                            | N                     |                            |                  | 0.195                         |
| 12                            | Y                     | Y                          | 0.807            |                               |
| 13                            | Y                     | Y                          | 0.962            |                               |
| 14                            | Y                     | Y                          | 0.799            |                               |
| 15                            | Y                     | Y                          | 0.941            |                               |
| 16                            | Y                     | Y                          | 0.902            |                               |
| 17                            | Y                     | Y                          | 0.422            |                               |
| 18                            | Y                     | Y                          | 0.702            |                               |
| 19                            | Y                     | Y                          | 0.248            |                               |
| 20                            | Y                     | Y                          | 0.694            |                               |
| 21                            | N                     |                            |                  | 0.574                         |
| 22                            | N                     |                            |                  | 0.645                         |
| 23                            | Y                     | N                          |                  | 0.779                         |
| 24                            | Y                     | Y                          | 0.521            |                               |
| 25                            | Y                     | Y                          | 0.856            |                               |
| 26                            | Y                     | Y                          | 0.534            |                               |
| 27                            | Y                     | Y                          | 0.994            |                               |
| 28                            | Y                     | Y                          | 0.939            |                               |
| 29                            | Y                     | Y                          | 0.399            |                               |
| 30                            | Y                     | Y                          | 0.723            |                               |
| 31                            | Y                     | Y                          | 0.294            |                               |
| 32                            | Y                     | Y                          | 0.982            |                               |
| 33                            | Y                     | Y                          | 0.416            |                               |
| 34                            | Y                     | Y                          | 0.211            |                               |
| 35                            | Y                     | Y                          | 0.443            |                               |
| 36                            | Y                     | Y                          | 0.614            |                               |
| 37                            | Y                     | Y                          | 0.416            |                               |
| 38                            | Y                     | Y                          | 0.862            |                               |
| 39                            | Y                     | Y                          | 0.467            |                               |
| 40                            | Y                     | Y                          | 0.996            |                               |
| 41                            | Y                     | Y                          | 0.365            |                               |

|    |   |   |       |       |
|----|---|---|-------|-------|
| 42 | N |   |       | 0.328 |
| 43 | Y | Y | 0.173 |       |
| 44 | N |   |       | 0.959 |
| 45 | N |   |       | 0.645 |
| 46 | N |   |       | 0.574 |
| 47 | N |   |       | 1     |
| 48 | N |   |       | 0.505 |
| 49 | Y | N |       | 0.798 |
| 50 | Y | Y | 0.347 |       |
| 51 | Y | Y | 0.737 |       |
| 52 | Y | Y | 0.541 |       |
| 53 | Y | Y | 0.294 |       |
| 54 | Y | Y | 0.192 |       |
| 55 | Y | Y | 0.783 |       |
| 56 | Y | Y | 0.694 |       |
| 57 | Y | Y | 0.982 |       |
| 58 | Y | Y | 0.56  |       |
| 59 | N |   |       | 0.536 |
| 60 | Y | Y | 0.75  |       |

|            | miR-26a-AS vs. control |                            |                  |                               |
|------------|------------------------|----------------------------|------------------|-------------------------------|
| Time (min) | Normality test passed  | Equal variance test passed | P-value (t-test) | P-value (Mann-Whitney U Test) |
| 1          |                        |                            |                  |                               |
| 2          |                        |                            |                  |                               |
| 3          |                        |                            |                  |                               |
| 4          |                        |                            |                  |                               |
| 5          |                        |                            |                  |                               |
| 6          | Y                      | Y                          | 0.049            |                               |
| 7          | Y                      | Y                          | 0.002            |                               |
| 8          | Y                      | Y                          | 0.007            |                               |
| 9          | N                      |                            |                  | <0.001                        |
| 10         | Y                      | Y                          | 0.004            |                               |
| 11         | Y                      | Y                          | 0.012            |                               |
| 12         | Y                      | N                          |                  | 0.054                         |
| 13         | Y                      | N                          |                  | 0.021                         |
| 14         | Y                      | N                          |                  | 0.072                         |
| 15         | Y                      | Y                          | 0.054            |                               |
| 16         | Y                      | Y                          | 0.017            |                               |
| 17         | N                      |                            |                  | 0.021                         |
| 18         | Y                      | N                          |                  | 0.011                         |
| 19         | Y                      | N                          |                  | 0.035                         |
| 20         | Y                      | N                          |                  | 0.04                          |
| 21         | N                      |                            |                  | 0.04                          |
| 22         | N                      |                            |                  | 0.094                         |
| 23         | N                      |                            |                  | 0.026                         |
| 24         | N                      |                            |                  | 0.152                         |
| 25         | N                      |                            |                  | 0.152                         |
| 26         | N                      |                            |                  | 0.014                         |
| 27         | N                      |                            |                  | 0.054                         |
| 28         | N                      |                            |                  | 0.021                         |
| 29         | N                      |                            |                  | 0.009                         |
| 30         | N                      |                            |                  | 0.029                         |
| 31         | Y                      | Y                          | 0.025            |                               |
| 32         | Y                      | N                          |                  | 0.014                         |
| 33         | Y                      | N                          |                  | 0.021                         |
| 34         | Y                      | Y                          | 0.089            |                               |
| 35         | Y                      | Y                          | 0.033            |                               |
| 36         | N                      |                            |                  | 0.094                         |
| 37         | Y                      | N                          |                  | 0.011                         |
| 38         | Y                      | N                          |                  | 0.019                         |
| 39         | Y                      | N                          |                  | 0.108                         |
| 40         | N                      |                            |                  | 0.008                         |
| 41         | Y                      | Y                          | 0.035            |                               |

|    |   |   |        |       |
|----|---|---|--------|-------|
| 42 | Y | N |        | 0.005 |
| 43 | Y | N |        | 0.03  |
| 44 | Y | Y | 0.003  |       |
| 45 | Y | Y | 0.02   |       |
| 46 | Y | Y | 0.013  |       |
| 47 | Y | Y | 0.004  |       |
| 48 | Y | Y | 0.004  |       |
| 49 | Y | Y | 0.002  |       |
| 50 | Y | Y | 0.002  |       |
| 51 | Y | Y | 0.006  |       |
| 52 | Y | Y | 0.003  |       |
| 53 | Y | Y | 0.013  |       |
| 54 | Y | Y | 0.009  |       |
| 55 | Y | Y | 0.002  |       |
| 56 | Y | Y | 0.001  |       |
| 57 | Y | Y | 0.002  |       |
| 58 | Y | Y | <0.001 |       |
| 59 | Y | Y | 0.003  |       |
| 60 | Y | Y | 0.002  |       |



| miR-384-5p-AS vs. control |                       |                            |                  |                               |
|---------------------------|-----------------------|----------------------------|------------------|-------------------------------|
| Time (min)                | Normality test passed | Equal variance test passed | P-value (t-test) | P-value (Mann-Whitney U Test) |
| 1                         |                       |                            |                  |                               |
| 2                         |                       |                            |                  |                               |
| 3                         |                       |                            |                  |                               |
| 4                         |                       |                            |                  |                               |
| 5                         |                       |                            |                  |                               |
| 6                         | Y                     | Y                          | 0.036            |                               |
| 7                         | Y                     | Y                          | 0.004            |                               |
| 8                         | Y                     | N                          |                  | 0.014                         |
| 9                         | Y                     | N                          |                  | 0.001                         |
| 10                        | Y                     | N                          |                  | 0.005                         |
| 11                        | Y                     | Y                          | 0.008            |                               |
| 12                        | Y                     | N                          |                  | 0.008                         |
| 13                        | Y                     | N                          |                  | 0.03                          |
| 14                        | Y                     | N                          |                  | 0.008                         |
| 15                        | Y                     | N                          |                  | 0.049                         |
| 16                        | Y                     | Y                          | 0.011            |                               |
| 17                        | Y                     | Y                          | 0.003            |                               |
| 18                        | Y                     | Y                          | 0.003            |                               |
| 19                        | Y                     | N                          |                  | 0.003                         |
| 20                        | Y                     | Y                          | 0.007            |                               |
| 21                        | N                     |                            |                  | 0.03                          |
| 22                        | N                     |                            |                  | 0.049                         |
| 23                        | Y                     | Y                          | 0.023            |                               |
| 24                        | Y                     | Y                          | 0.03             |                               |
| 25                        | Y                     | Y                          | 0.009            |                               |
| 26                        | Y                     | Y                          | 0.003            |                               |
| 27                        | Y                     | Y                          | 0.01             |                               |
| 28                        | N                     |                            |                  | 0.005                         |
| 29                        | Y                     | Y                          | <0.001           |                               |
| 30                        | Y                     | Y                          | 0.004            |                               |
| 31                        | N                     |                            |                  | 0.011                         |
| 32                        | N                     |                            |                  | 0.008                         |
| 33                        | N                     |                            |                  | 0.006                         |
| 34                        | Y                     | Y                          | 0.069            |                               |
| 35                        | N                     |                            |                  | 0.014                         |
| 36                        | N                     |                            |                  | 0.011                         |
| 37                        | N                     |                            |                  | 0.006                         |
| 38                        | N                     |                            |                  | 0.008                         |
| 39                        | Y                     | Y                          | 0.009            |                               |
| 40                        | N                     |                            |                  | 0.008                         |
| 41                        | Y                     | Y                          | 0.029            |                               |

|    |   |   |       |       |
|----|---|---|-------|-------|
| 42 | N |   |       | 0.014 |
| 43 | N |   |       | 0.011 |
| 44 | Y | Y | 0.012 |       |
| 45 | N |   |       | 0.039 |
| 46 | Y | Y | 0.028 |       |
| 47 | N |   |       | 0.03  |
| 48 | Y | Y | 0.042 |       |
| 49 | Y | Y | 0.036 |       |
| 50 | Y | Y | 0.015 |       |
| 51 | Y | Y | 0.02  |       |
| 52 | N |   |       | 0.015 |
| 53 | Y | Y | 0.038 |       |
| 54 | Y | Y | 0.103 |       |
| 55 | Y | Y | 0.042 |       |
| 56 | N |   |       | 0.009 |
| 57 | Y | Y | 0.013 |       |
| 58 | Y | Y | 0.013 |       |
| 59 | Y | Y | 0.021 |       |
| 60 | Y | Y | 0.035 |       |

| miR-191-antisense vs. control |                       |                            |                  |                               |
|-------------------------------|-----------------------|----------------------------|------------------|-------------------------------|
| Time (min)                    | Normality test passed | Equal variance test passed | P-value (t-test) | P-value (Mann-Whitney U Test) |
| 1                             |                       |                            |                  |                               |
| 2                             |                       |                            |                  |                               |
| 3                             |                       |                            |                  |                               |
| 4                             |                       |                            |                  |                               |
| 5                             |                       |                            |                  |                               |
| 6                             | Y                     | Y                          | 0.664            |                               |
| 7                             | Y                     | Y                          | 0.815            |                               |
| 8                             | Y                     | Y                          | 0.977            |                               |
| 9                             | Y                     | Y                          | 0.234            |                               |
| 10                            | Y                     | Y                          | 0.619            |                               |
| 11                            | Y                     | Y                          | 0.444            |                               |
| 12                            | Y                     | Y                          | 0.273            |                               |
| 13                            | Y                     | Y                          | 0.399            |                               |
| 14                            | Y                     | Y                          | 0.129            |                               |
| 15                            | Y                     | Y                          | 0.147            |                               |
| 16                            | Y                     | Y                          | 0.131            |                               |
| 17                            | Y                     | Y                          | 0.02             |                               |
| 18                            | N                     |                            |                  | 0.026                         |
| 19                            | Y                     | Y                          | 0.101            |                               |
| 20                            | Y                     | Y                          | 0.011            |                               |
| 21                            | N                     |                            |                  | 0.011                         |
| 22                            | N                     |                            |                  | 0.018                         |
| 23                            | Y                     | Y                          | 0.064            |                               |
| 24                            | Y                     | Y                          | 0.01             |                               |
| 25                            | N                     |                            |                  | 0.018                         |
| 26                            | Y                     | Y                          | 0.243            |                               |
| 27                            | Y                     | Y                          | 0.056            |                               |
| 28                            | Y                     | Y                          | 0.185            |                               |
| 29                            | Y                     | Y                          | 0.125            |                               |
| 30                            | Y                     | Y                          | 0.05             |                               |
| 31                            | Y                     | Y                          | 0.023            |                               |
| 32                            | Y                     | Y                          | 0.043            |                               |
| 33                            | Y                     | Y                          | 0.052            |                               |
| 34                            | Y                     | Y                          | 0.025            |                               |
| 35                            | Y                     | Y                          | 0.042            |                               |
| 36                            | Y                     | Y                          | 0.01             |                               |
| 37                            | Y                     | Y                          | 0.008            |                               |
| 38                            | Y                     | Y                          | 0.008            |                               |
| 39                            | Y                     | Y                          | 0.005            |                               |
| 40                            | Y                     | Y                          | <0.001           |                               |
| 41                            | Y                     | Y                          | <0.001           |                               |

|    |   |   |        |       |
|----|---|---|--------|-------|
| 42 | Y | Y | 0.002  |       |
| 43 | Y | Y | <0.001 |       |
| 44 | N |   |        | 0.018 |
| 45 | N |   |        | 0.006 |
| 46 | Y | Y | 0.01   |       |
| 47 | Y | Y | 0.009  |       |
| 48 | Y | Y | 0.035  |       |
| 49 | Y | Y | 0.008  |       |
| 50 | Y | Y | 0.004  |       |
| 51 | Y | Y | 0.023  |       |
| 52 | Y | Y | 0.05   |       |
| 53 | N |   |        | 0.073 |
| 54 | Y | Y | 0.021  |       |
| 55 | Y | Y | 0.14   |       |
| 56 | Y | Y | 0.266  |       |
| 57 | Y | Y | 0.179  |       |
| 58 | Y | Y | 0.301  |       |
| 59 | Y | Y | 0.259  |       |
| 60 | Y | Y | 0.139  |       |

**Supplementary Table 7.** Statistical analysis of electrophysiology data in Fig. 3g

| <b>Comparison between vehicle and BI-D1870 treated groups</b> |                       |                            |                  |                               |
|---------------------------------------------------------------|-----------------------|----------------------------|------------------|-------------------------------|
| Time after LTP induction (min)                                | Normality Test passed | Equal Variance Test passed | P value (T-test) | P value (Mann-Whitney U Test) |
| 3                                                             | Y                     | Y                          | 0.907            |                               |
| 6                                                             | Y                     | Y                          | 0.295            |                               |
| 9                                                             | Y                     | Y                          | 0.294            |                               |
| 12                                                            | Y                     | Y                          | 0.318            |                               |
| 15                                                            | Y                     | Y                          | 0.251            |                               |
| 18                                                            | Y                     | Y                          | 0.205            |                               |
| 21                                                            | Y                     | Y                          | 0.354            |                               |
| 24                                                            | Y                     | Y                          | 0.499            |                               |
| 27                                                            | Y                     | Y                          | 0.406            |                               |
| 30                                                            | Y                     | Y                          | 0.304            |                               |
| 33                                                            | Y                     | Y                          | 0.539            |                               |
| 36                                                            | Y                     | Y                          | 0.402            |                               |
| 39                                                            | Y                     | Y                          | 0.138            |                               |
| 42                                                            | Y                     | Y                          | 0.133            |                               |
| 45                                                            | Y                     | Y                          | 0.135            |                               |
| 48                                                            | Y                     | Y                          | 0.172            |                               |
| 51                                                            | Y                     | Y                          | 0.086            |                               |
| 54                                                            | N                     |                            |                  | 0.117                         |
| 57                                                            | Y                     | Y                          | 0.088            |                               |
| 60                                                            | Y                     | Y                          | 0.064            |                               |
| 63                                                            | N                     |                            |                  | 0.117                         |
| 66                                                            | Y                     | Y                          | 0.026            |                               |
| 69                                                            | Y                     | Y                          | 0.072            |                               |
| 72                                                            | Y                     | Y                          | 0.117            |                               |
| 75                                                            | Y                     | Y                          | 0.008            |                               |
| 78                                                            | Y                     | Y                          | 0.022            |                               |
| 81                                                            | Y                     | Y                          | 0.028            |                               |
| 84                                                            | Y                     | Y                          | 0.074            |                               |
| 87                                                            | Y                     | Y                          | 0.073            |                               |
| 90                                                            | Y                     | Y                          | 0.027            |                               |
| 93                                                            | Y                     | Y                          | 0.027            |                               |
| 96                                                            | Y                     | N                          |                  | 0.033                         |
| 99                                                            | Y                     | Y                          | 0.015            |                               |
| 102                                                           | Y                     | Y                          | 0.011            |                               |
| 105                                                           | Y                     | Y                          | 0.008            |                               |
| 108                                                           | Y                     | Y                          | 0.014            |                               |
| 111                                                           | Y                     | Y                          | 0.018            |                               |
| 114                                                           | Y                     | Y                          | 0.014            |                               |
| 117                                                           | Y                     | Y                          | 0.01             |                               |
| 120                                                           | Y                     | Y                          | 0.013            |                               |

**Supplementary Table 8.** Statistical analysis of electrophysiology data in Supplementary Fig. 7a

| <b>Comparison between pre-stimulation baseline and post-stimulation fEPSPs</b> |            |                       |                            |                  |                               |
|--------------------------------------------------------------------------------|------------|-----------------------|----------------------------|------------------|-------------------------------|
|                                                                                | Time (min) | Normality Test passed | Equal Variance Test passed | P value (T-test) | P value (Mann-Whitney U Test) |
| After first HFS                                                                | 5          | Y                     | Y                          | <0.001           |                               |
| After first HFS                                                                | 10         | Y                     | Y                          | <0.001           |                               |
| After first HFS                                                                | 15         | Y                     | Y                          | <0.001           |                               |
| After first HFS                                                                | 20         | Y                     | Y                          | 0.006            |                               |
| After first HFS                                                                | 25         | N                     |                            |                  | 0.008                         |
| After first HFS                                                                | 30         | Y                     | Y                          | <0.001           |                               |
| After first HFS                                                                | 35         | N                     |                            |                  | 0.008                         |
| After first HFS                                                                | 40         | Y                     | Y                          | <0.001           |                               |
| After first HFS                                                                | 45         | N                     |                            |                  | 0.008                         |
| After first HFS                                                                | 50         | N                     |                            |                  | 0.008                         |
| After first HFS                                                                | 55         | N                     |                            |                  | 0.008                         |
| After first HFS                                                                | 60         | N                     |                            |                  | 0.008                         |
| After first HFS                                                                | 65         | Y                     | Y                          | 0.004            |                               |
| After first HFS                                                                | 70         | N                     |                            |                  | 0.008                         |
| After first HFS                                                                | 75         | N                     |                            |                  | 0.008                         |
| After first HFS                                                                | 80         | N                     |                            |                  | 0.008                         |
| After first HFS                                                                | 85         | N                     |                            |                  | 0.008                         |
| After first HFS                                                                | 90         | N                     |                            |                  | 0.008                         |
| After first HFS                                                                | 95         | Y                     | Y                          | 0.01             |                               |
| After first HFS                                                                | 100        | Y                     | Y                          | 0.024            |                               |
| After first HFS                                                                | 105        | Y                     | Y                          | 0.018            |                               |
| After first HFS                                                                | 110        | Y                     | Y                          | 0.095            |                               |
| After first HFS                                                                | 115        | N                     |                            |                  | 0.69                          |
| After first HFS                                                                | 120        | N                     |                            |                  | 0.151                         |
| After washout                                                                  | 5          | N                     |                            |                  | 0.151                         |
| After washout                                                                  | 10         | N                     |                            |                  | 0.151                         |
| After washout                                                                  | 15         | N                     |                            |                  | 0.008                         |
| After washout                                                                  | 20         | N                     |                            |                  | 0.008                         |

|                  |     |   |   |        |       |
|------------------|-----|---|---|--------|-------|
| After washout    | 25  | Y | Y | 0.115  |       |
| After washout    | 30  | N |   |        | 0.008 |
| After washout    | 35  | N |   |        | 0.151 |
| After washout    | 40  | Y | Y | 0.143  |       |
| After washout    | 45  | Y | Y | 0.136  |       |
| After washout    | 50  | N |   |        | 0.69  |
| After washout    | 55  | N |   |        | 0.69  |
| After washout    | 60  | N |   |        | 0.151 |
| After second HFS | 5   | N |   |        | 0.008 |
| After second HFS | 10  | Y | Y | <0.001 |       |
| After second HFS | 15  | Y | Y | <0.001 |       |
| After second HFS | 20  | Y | Y | <0.001 |       |
| After second HFS | 25  | Y | Y | <0.001 |       |
| After second HFS | 30  | Y | Y | <0.001 |       |
| After second HFS | 35  | N |   |        | 0.008 |
| After second HFS | 40  | N |   |        | 0.008 |
| After second HFS | 45  | Y | Y | <0.001 |       |
| After second HFS | 50  | N |   |        | 0.008 |
| After second HFS | 55  | Y | Y | <0.001 |       |
| After second HFS | 60  | N |   |        | 0.008 |
| After second HFS | 65  | Y | Y | <0.001 |       |
| After second HFS | 70  | Y | Y | <0.001 |       |
| After second HFS | 75  | Y | Y | <0.001 |       |
| After second HFS | 80  | Y | Y | <0.001 |       |
| After second HFS | 85  | Y | Y | <0.001 |       |
| After second HFS | 90  | Y | Y | <0.001 |       |
| After second HFS | 95  | Y | Y | <0.001 |       |
| After second HFS | 100 | N |   |        | 0.008 |
| After second HFS | 105 | N |   |        | 0.008 |
| After second HFS | 110 | Y | Y | <0.001 |       |
| After second HFS | 115 | Y | Y | <0.001 |       |
| After second HFS | 120 | Y | Y | <0.001 |       |

**Supplementary Table 9.** Statistical analysis of electrophysiology data in Fig. 3h.

| <b>Comparison of 4 groups (EGFP, RSK3 siRNA, RSK3 siRNA+RSK3-m, RSK3)</b> |                       |                            |                         |                               |
|---------------------------------------------------------------------------|-----------------------|----------------------------|-------------------------|-------------------------------|
| Time after LTP induction (min)                                            | Normality test passed | Equal variance test passed | P-value (One-way ANOVA) | P-value (Kruskal-Wallis test) |
| 3                                                                         | Y                     | Y                          | 0.282                   |                               |
| 6                                                                         | Y                     | N                          |                         | 0.726                         |
| 9                                                                         | Y                     | Y                          | 0.495                   |                               |
| 12                                                                        | Y                     | N                          |                         | 0.747                         |
| 15                                                                        | N                     |                            |                         | 0.709                         |
| 18                                                                        | N                     |                            |                         | 0.71                          |
| 21                                                                        | Y                     | Y                          | 0.554                   |                               |
| 24                                                                        | Y                     | N                          |                         | 0.701                         |
| 27                                                                        | Y                     | Y                          | 0.556                   |                               |
| 30                                                                        | Y                     | Y                          | 0.734                   |                               |
| 33                                                                        | Y                     | Y                          | 0.639                   |                               |
| 36                                                                        | Y                     | N                          |                         | 0.786                         |
| 39                                                                        | Y                     | Y                          | 0.417                   |                               |
| 42                                                                        | Y                     | Y                          | 0.421                   |                               |
| 45                                                                        | Y                     | Y                          | 0.283                   |                               |
| 48                                                                        | Y                     | Y                          | 0.623                   |                               |
| 51                                                                        | Y                     | Y                          | 0.498                   |                               |
| 54                                                                        | Y                     | Y                          | 0.28                    |                               |
| 57                                                                        | Y                     | Y                          | 0.204                   |                               |
| 60                                                                        | Y                     | Y                          | 0.161                   |                               |
| 63                                                                        | Y                     | Y                          | 0.257                   |                               |
| 66                                                                        | Y                     | N                          |                         | 0.04                          |
| 69                                                                        | Y                     | Y                          | 0.096                   |                               |
| 72                                                                        | Y                     | Y                          | 0.049                   |                               |
| 75                                                                        | Y                     | N                          |                         | 0.045                         |
| 78                                                                        | Y                     | Y                          | 0.099                   |                               |
| 81                                                                        | Y                     | Y                          | 0.156                   |                               |
| 84                                                                        | Y                     | Y                          | 0.041                   |                               |
| 87                                                                        | Y                     | Y                          | 0.038                   |                               |
| 90                                                                        | Y                     | Y                          | 0.013                   |                               |
| 93                                                                        | Y                     | Y                          | 0.018                   |                               |
| 96                                                                        | Y                     | Y                          | 0.024                   |                               |
| 99                                                                        | N                     |                            |                         | 0.013                         |
| 102                                                                       | Y                     | Y                          | 0.056                   |                               |
| 105                                                                       | Y                     | Y                          | 0.01                    |                               |
| 108                                                                       | Y                     | Y                          | 0.023                   |                               |
| 111                                                                       | Y                     | Y                          | 0.016                   |                               |
| 114                                                                       | Y                     | Y                          | 0.006                   |                               |
| 117                                                                       | N                     |                            |                         | 0.004                         |
| 120                                                                       | Y                     | Y                          | 0.012                   |                               |



| Time after LTP induction (min) | RSK3 siRNA vs. EGFP   |                            |                  | P-value (Mann-Whitney U Test) |
|--------------------------------|-----------------------|----------------------------|------------------|-------------------------------|
|                                | Normality test passed | Equal variance test passed | P-value (t-test) |                               |
| 3                              |                       |                            |                  |                               |
| 6                              |                       |                            |                  |                               |
| 9                              |                       |                            |                  |                               |
| 12                             |                       |                            |                  |                               |
| 15                             |                       |                            |                  |                               |
| 18                             |                       |                            |                  |                               |
| 21                             |                       |                            |                  |                               |
| 24                             |                       |                            |                  |                               |
| 27                             |                       |                            |                  |                               |
| 30                             |                       |                            |                  |                               |
| 33                             |                       |                            |                  |                               |
| 36                             |                       |                            |                  |                               |
| 39                             |                       |                            |                  |                               |
| 42                             |                       |                            |                  |                               |
| 45                             |                       |                            |                  |                               |
| 48                             |                       |                            |                  |                               |
| 51                             |                       |                            |                  |                               |
| 54                             |                       |                            |                  |                               |
| 57                             |                       |                            |                  |                               |
| 60                             |                       |                            |                  |                               |
| 63                             |                       |                            |                  |                               |
| 66                             | Y                     | N                          |                  | 0.04                          |
| 69                             |                       |                            |                  |                               |
| 72                             | Y                     | N                          |                  | 0.025                         |
| 75                             | Y                     | N                          |                  | 0.011                         |
| 78                             |                       |                            |                  |                               |
| 81                             |                       |                            |                  |                               |
| 84                             | N                     |                            |                  | 0.006                         |
| 87                             | Y                     | Y                          | 0.016            |                               |
| 90                             | Y                     | Y                          | 0.004            |                               |
| 93                             | Y                     | Y                          | 0.008            |                               |
| 96                             | Y                     | Y                          | 0.015            |                               |
| 99                             | N                     |                            |                  | 0.025                         |
| 102                            |                       |                            |                  |                               |
| 105                            | N                     |                            |                  | 0.004                         |
| 108                            | Y                     | Y                          | 0.015            |                               |
| 111                            | Y                     | Y                          | 0.021            |                               |
| 114                            | Y                     | Y                          | 0.006            |                               |
| 117                            | N                     |                            |                  | 0.004                         |
| 120                            | Y                     | N                          |                  | 0.008                         |

|                                | RSK3 siRNA+RSK3-m vs. EGFP |                            |                  |                               |
|--------------------------------|----------------------------|----------------------------|------------------|-------------------------------|
| Time after LTP induction (min) | Normality test passed      | Equal variance test passed | P-value (t-test) | P-value (Mann-Whitney U Test) |
| 3                              |                            |                            |                  |                               |
| 6                              |                            |                            |                  |                               |
| 9                              |                            |                            |                  |                               |
| 12                             |                            |                            |                  |                               |
| 15                             |                            |                            |                  |                               |
| 18                             |                            |                            |                  |                               |
| 21                             |                            |                            |                  |                               |
| 24                             |                            |                            |                  |                               |
| 27                             |                            |                            |                  |                               |
| 30                             |                            |                            |                  |                               |
| 33                             |                            |                            |                  |                               |
| 36                             |                            |                            |                  |                               |
| 39                             |                            |                            |                  |                               |
| 42                             |                            |                            |                  |                               |
| 45                             |                            |                            |                  |                               |
| 48                             |                            |                            |                  |                               |
| 51                             |                            |                            |                  |                               |
| 54                             |                            |                            |                  |                               |
| 57                             |                            |                            |                  |                               |
| 60                             |                            |                            |                  |                               |
| 63                             |                            |                            |                  |                               |
| 66                             | Y                          | Y                          | 0.881            |                               |
| 69                             |                            |                            |                  |                               |
| 72                             | Y                          | Y                          | 0.302            |                               |
| 75                             | Y                          | Y                          | 0.436            |                               |
| 78                             |                            |                            |                  |                               |
| 81                             |                            |                            |                  |                               |
| 84                             | Y                          | Y                          | 0.811            |                               |
| 87                             | Y                          | Y                          | 0.824            |                               |
| 90                             | Y                          | Y                          | 0.755            |                               |
| 93                             | Y                          | Y                          | 0.822            |                               |
| 96                             | Y                          | Y                          | 0.802            |                               |
| 99                             | Y                          | Y                          | 0.881            |                               |
| 102                            |                            |                            |                  |                               |
| 105                            | Y                          | Y                          | 0.557            |                               |
| 108                            | Y                          | Y                          | 0.777            |                               |
| 111                            | Y                          | Y                          | 0.933            |                               |
| 114                            | Y                          | Y                          | 0.93             |                               |
| 117                            | Y                          | Y                          | 0.718            |                               |
| 120                            | Y                          | Y                          | 0.727            |                               |

| RSK3 vs. EGFP                  |                       |                            |                  |                               |
|--------------------------------|-----------------------|----------------------------|------------------|-------------------------------|
| Time after LTP induction (min) | Normality test passed | Equal variance test passed | P-value (t-test) | P-value (Mann-Whitney U Test) |
| 3                              |                       |                            |                  |                               |
| 6                              |                       |                            |                  |                               |
| 9                              |                       |                            |                  |                               |
| 12                             |                       |                            |                  |                               |
| 15                             |                       |                            |                  |                               |
| 18                             |                       |                            |                  |                               |
| 21                             |                       |                            |                  |                               |
| 24                             |                       |                            |                  |                               |
| 27                             |                       |                            |                  |                               |
| 30                             |                       |                            |                  |                               |
| 33                             |                       |                            |                  |                               |
| 36                             |                       |                            |                  |                               |
| 39                             |                       |                            |                  |                               |
| 42                             |                       |                            |                  |                               |
| 45                             |                       |                            |                  |                               |
| 48                             |                       |                            |                  |                               |
| 51                             |                       |                            |                  |                               |
| 54                             |                       |                            |                  |                               |
| 57                             |                       |                            |                  |                               |
| 60                             |                       |                            |                  |                               |
| 63                             |                       |                            |                  |                               |
| 66                             | Y                     | Y                          | 0.56             |                               |
| 69                             |                       |                            |                  |                               |
| 72                             | Y                     | Y                          | 0.328            |                               |
| 75                             | Y                     | Y                          | 0.403            |                               |
| 78                             |                       |                            |                  |                               |
| 81                             |                       |                            |                  |                               |
| 84                             | Y                     | Y                          | 0.83             |                               |
| 87                             | Y                     | Y                          | 0.832            |                               |
| 90                             | Y                     | Y                          | 0.718            |                               |
| 93                             | Y                     | Y                          | 0.934            |                               |
| 96                             | Y                     | Y                          | 0.607            |                               |
| 99                             | Y                     | Y                          | 0.673            |                               |
| 102                            |                       |                            |                  |                               |
| 105                            | Y                     | Y                          | 0.677            |                               |
| 108                            | Y                     | Y                          | 0.7              |                               |
| 111                            | Y                     | Y                          | 0.377            |                               |
| 114                            | Y                     | Y                          | 0.566            |                               |
| 117                            | Y                     | Y                          | 0.962            |                               |
| 120                            | Y                     | Y                          | 0.987            |                               |

**Supplementary Table 10.** Statistical analysis of electrophysiology data in Fig. 3i.

| Comparison of 3 groups (EGFP, miR-26a+RSK3, miR-384-5p+RSK3) |                       |                            |                         |                               |
|--------------------------------------------------------------|-----------------------|----------------------------|-------------------------|-------------------------------|
| Time after LTP induction (min)                               | Normality test passed | Equal variance test passed | P-value (One-way ANOVA) | P-value (Kruskal-Wallis test) |
| 3                                                            | N                     |                            |                         | 0.168                         |
| 6                                                            | N                     |                            |                         | 0.417                         |
| 9                                                            | N                     |                            |                         | 0.437                         |
| 12                                                           | N                     |                            |                         | 0.653                         |
| 15                                                           | N                     |                            |                         | 0.668                         |
| 18                                                           | N                     |                            |                         | 0.393                         |
| 21                                                           | N                     |                            |                         | 0.437                         |
| 24                                                           | N                     |                            |                         | 0.574                         |
| 27                                                           | N                     |                            |                         | 0.9                           |
| 30                                                           | N                     |                            |                         | 0.728                         |
| 33                                                           | N                     |                            |                         | 0.75                          |
| 36                                                           | N                     |                            |                         | 0.51                          |
| 39                                                           | N                     |                            |                         | 0.665                         |
| 42                                                           | N                     |                            |                         | 0.863                         |
| 45                                                           | N                     |                            |                         | 0.887                         |
| 48                                                           | N                     |                            |                         | 0.895                         |
| 51                                                           | N                     |                            |                         | 0.622                         |
| 54                                                           | N                     |                            |                         | 0.683                         |
| 57                                                           | N                     |                            |                         | 0.705                         |
| 60                                                           | N                     |                            |                         | 0.583                         |
| 63                                                           | N                     |                            |                         | 0.83                          |
| 66                                                           | N                     |                            |                         | 0.871                         |
| 69                                                           | N                     |                            |                         | 0.776                         |
| 72                                                           | N                     |                            |                         | 0.402                         |
| 75                                                           | N                     |                            |                         | 0.349                         |
| 78                                                           | N                     |                            |                         | 0.587                         |
| 81                                                           | Y                     | Y                          | 0.679                   |                               |
| 84                                                           | N                     |                            |                         | 0.793                         |
| 87                                                           | N                     |                            |                         | 0.708                         |
| 90                                                           | N                     |                            |                         | 0.64                          |
| 93                                                           | N                     |                            |                         | 0.687                         |
| 96                                                           | N                     |                            |                         | 0.746                         |
| 99                                                           | N                     |                            |                         | 0.591                         |
| 102                                                          | N                     |                            |                         | 0.613                         |
| 105                                                          | N                     |                            |                         | 0.534                         |
| 108                                                          | N                     |                            |                         | 0.496                         |
| 111                                                          | N                     |                            |                         | 0.482                         |
| 114                                                          | N                     |                            |                         | 0.506                         |
| 117                                                          | N                     |                            |                         | 0.215                         |
| 120                                                          | N                     |                            |                         | 0.483                         |

**Supplementary Table 11.** Statistical analysis of electrophysiology data in Fig. 10a.

| <b>Comparison between EGFP and let-7 virus-transduced slices</b> |                       |                            |                  |                               |
|------------------------------------------------------------------|-----------------------|----------------------------|------------------|-------------------------------|
| Time after LTP induction (min)                                   | Normality Test passed | Equal Variance Test passed | P value (T-test) | P value (Mann-Whitney U Test) |
| 3                                                                | Y                     | Y                          | 0.393            |                               |
| 6                                                                | N                     |                            |                  | 0.213                         |
| 9                                                                | Y                     | Y                          | 0.325            |                               |
| 12                                                               | N                     |                            |                  | 0.65                          |
| 15                                                               | Y                     | Y                          | 0.652            |                               |
| 18                                                               | Y                     | Y                          | 0.865            |                               |
| 21                                                               | N                     |                            |                  | 0.91                          |
| 24                                                               | Y                     | Y                          | 0.543            |                               |
| 27                                                               | N                     |                            |                  | 0.213                         |
| 30                                                               | Y                     | Y                          | 0.68             |                               |
| 33                                                               | Y                     | Y                          | 0.519            |                               |
| 36                                                               | Y                     | Y                          | 0.158            |                               |
| 39                                                               | N                     |                            |                  | 0.23                          |
| 42                                                               | Y                     | Y                          | 0.064            |                               |
| 45                                                               | Y                     | Y                          | 0.125            |                               |
| 48                                                               | Y                     | Y                          | 0.192            |                               |
| 51                                                               | Y                     | Y                          | 0.188            |                               |
| 54                                                               | Y                     | Y                          | 0.068            |                               |
| 57                                                               | Y                     | Y                          | 0.072            |                               |
| 60                                                               | Y                     | Y                          | 0.054            |                               |
| 63                                                               | Y                     | Y                          | 0.074            |                               |
| 66                                                               | Y                     | Y                          | 0.055            |                               |
| 69                                                               | Y                     | Y                          | 0.089            |                               |
| 72                                                               | Y                     | Y                          | 0.037            |                               |
| 75                                                               | Y                     | Y                          | 0.041            |                               |
| 78                                                               | Y                     | Y                          | 0.034            |                               |
| 81                                                               | Y                     | Y                          | 0.076            |                               |
| 84                                                               | Y                     | Y                          | 0.121            |                               |
| 87                                                               | Y                     | Y                          | 0.047            |                               |
| 90                                                               | Y                     | Y                          | 0.021            |                               |
| 93                                                               | Y                     | Y                          | 0.041            |                               |
| 96                                                               | Y                     | Y                          | 0.048            |                               |
| 99                                                               | Y                     | Y                          | 0.091            |                               |
| 102                                                              | Y                     | Y                          | 0.076            |                               |
| 105                                                              | Y                     | Y                          | 0.032            |                               |
| 108                                                              | Y                     | Y                          | 0.046            |                               |
| 111                                                              | N                     |                            |                  | 0.046                         |
| 114                                                              | Y                     | Y                          | 0.028            |                               |
| 117                                                              | Y                     | Y                          | 0.029            |                               |
| 120                                                              | Y                     | Y                          | 0.045            |                               |
